# Supplementary material for: Long-lived metabolic enzymes in the crystalline lens identified by pulse-labeling of mice and mass spectrometry
Source: eLife. 2019 Dec 10;8:e50170. doi: 10.7554/eLife.50170 (PMC6914337; doi:10.7554/eLife.50170)
Supplement: Supplementary file 1. — Tables S1 to S5 show all proteins identified in whole lens, lens cortex, lens nucleus, sclera choroid and vitreoretinal respectively. The tables also include individual peptide and protein 14N/15N ratios, as well as relative total protein amount (calculated as MS spectral count). [file elife-50170-supp1.xlsx]

## Sheet: Lens
Table S1. A complete list of lens proteins identified by mass spectrometry
Uniprot Entry	Gene symbol	Peptide ratio(s) (14N/15N)	Composite ratio (14N/15N)	Spectra count	Protein names
P20152	Vim	0.02553,0.06611,0.06611,0.07158,0.06154,0.06154,0.02035,	0.06	39	Vimentin
Q8QZY1	Eif3l Eif3eip Eif3s6ip Paf67	0.13298,	0.13	8	Eukaryotic translation initiation factor 3 subunit L (eIF3l) (66 kDa tyrosine-rich heat shock protein) (67 kDa polymerase-associated factor) (Eukaryotic translation initiation factor 3 subunit 6-interacting protein) (Eukaryotic translation initiation factor 3 subunit E-interacting protein) (HSP-66Y) (PAF67)
P84244	H3f3a H3.3a; H3f3b H3.3b	0.12294,0.33594,	0.2	12	Histone H3.3
P02301	H3f3c Gm14384	0.12294,0.33594,	0.2	12	Histone H3.3C (Embryonic)
O08709	Prdx6 Aop2 Ltw4 Prdx5	0.26277,	0.26	6	Peroxiredoxin-6 (EC 1.11.1.15) (1-Cys peroxiredoxin) (1-Cys PRX) (Acidic calcium-independent phospholipase A2) (aiPLA2) (EC 3.1.1.4) (Antioxidant protein 2) (Non-selenium glutathione peroxidase) (NSGPx)
Q920Q8	Ivns1abp Kiaa0850 Nd1 Nd1L Nd1S Ns1 Ns1bp	0.32815,0.30976,	0.32	3	Influenza virus NS1A-binding protein homolog (NS1-BP) (NS1-binding protein homolog) (Kelch family protein Nd1-L) (ND1-L2) (Nd1-S)
Q62433	Ndrg1 Ndr1 Ndrl Tdd5	0.42449,0.72621,0.44051,	0.44	12	Protein NDRG1 (N-myc downstream-regulated gene 1 protein) (Protein Ndr1)
P14602	Hspb1 Hsp25 Hsp27	0.51677,0.54899,0.63914,0.35888,0.54736,0.42452,0.17539,0.14644,	0.47	75	Heat shock protein beta-1 (HspB1) (Growth-related 25 kDa protein) (Heat shock 25 kDa protein) (HSP 25) (Heat shock 27 kDa protein) (HSP 27) (p25)
Q64727	Vcl	0.58045,	0.58	1	Vinculin (Metavinculin)
Q8R1M2	H2afj	0.6313,	0.63	6	Histone H2A.J (H2a/j)
P27661	H2afx H2a.x H2ax Hist5-2ax	0.6313,	0.63	6	Histone H2AX (H2a/x) (Histone H2A.X)
C0HKE1	Hist1h2ab	0.6313,	0.63	6	Histone H2A type 1-B
C0HKE2	Hist1h2ac	0.6313,	0.63	6	Histone H2A type 1-C
C0HKE3	Hist1h2ad	0.6313,	0.63	6	Histone H2A type 1-D
C0HKE4	Hist1h2ae	0.6313,	0.63	6	Histone H2A type 1-E
Q8CGP5	Hist1h2af	0.6313,	0.63	6	Histone H2A type 1-F
C0HKE5	Hist1h2ag	0.6313,	0.63	6	Histone H2A type 1-G
Q8CGP6	Hist1h2ah	0.6313,	0.63	6	Histone H2A type 1-H
C0HKE6	Hist1h2ai	0.6313,	0.63	6	Histone H2A type 1-I
Q8CGP7	Hist1h2ak	0.6313,	0.63	6	Histone H2A type 1-K
C0HKE7	Hist1h2an	0.6313,	0.63	6	Histone H2A type 1-N
C0HKE8	Hist1h2ao	0.6313,	0.63	6	Histone H2A type 1-O
C0HKE9	Hist1h2ap	0.6313,	0.63	6	Histone H2A type 1-P
Q6GSS7	Hist2h2aa1; Hist2h2aa2	0.6313,	0.63	6	Histone H2A type 2-A (H2a-614) (H2a-615) (Histone H2A.2)
Q64522	Hist2h2ab	0.6313,	0.63	6	Histone H2A type 2-B (H2a-613A)
Q64523	Hist2h2ac Hist2h2ab	0.6313,	0.63	6	Histone H2A type 2-C (H2a-613B)
Q8BFU2	Hist3h2a	0.6313,	0.63	6	Histone H2A type 3
P98203	Arvcf	0.53979,0.98334,0.55252,0.79257,	0.66	11	Armadillo repeat protein deleted in velo-cardio-facial syndrome homolog
Q8CIX8	Lgsn Gluld1 Lgs	0.76384,0.80242,0.63794,0.68277,0.6802,0.57231,0.6775,0.4383,	0.68	66	Lengsin (Glutamate-ammonia ligase domain-containing protein 1) (Lens glutamine synthase-like)
P10107	Anxa1 Anx1 Lpc-1 Lpc1	0.54661,0.66947,0.71247,0.79871,0.79871,	0.71	27	Annexin A1 (Annexin I) (Annexin-1) (Calpactin II) (Calpactin-2) (Chromobindin-9) (Lipocortin I) (Phospholipase A2 inhibitory protein) (p35)
Q9CQQ7	Atp5pb Atp5f1	0.71867,	0.72	3	ATP synthase F(0) complex subunit B1, mitochondrial (ATP synthase peripheral stalk-membrane subunit b) (ATP synthase subunit b) (ATPase subunit b)
Q61301	Ctnna2 Catna2	1.48477,0.36252,	0.73	11	Catenin alpha-2 (Alpha N-catenin)
P48036	Anxa5 Anx5	0.74871,	0.75	4	Annexin A5 (Anchorin CII) (Annexin V) (Annexin-5) (Calphobindin I) (CBP-I) (Endonexin II) (Lipocortin V) (Placental anticoagulant protein 4) (PP4) (Placental anticoagulant protein I) (PAP-I) (Thromboplastin inhibitor) (Vascular anticoagulant-alpha) (VAC-alpha)
P19096	Fasn	0.79226,0.72343,	0.76	4	Fatty acid synthase (EC 2.3.1.85) [Includes: [Acyl-carrier-protein] S-acetyltransferase (EC 2.3.1.38); [Acyl-carrier-protein] S-malonyltransferase (EC 2.3.1.39); 3-oxoacyl-[acyl-carrier-protein] synthase (EC 2.3.1.41); 3-oxoacyl-[acyl-carrier-protein] reductase (EC 1.1.1.100); 3-hydroxyacyl-[acyl-carrier-protein] dehydratase (EC 4.2.1.59); Enoyl-[acyl-carrier-protein] reductase (EC 1.3.1.39); Ole…
P17742	Ppia	0.79276,0.75873,	0.78	12	Peptidyl-prolyl cis-trans isomerase A (PPIase A) (EC 5.2.1.8) (Cyclophilin A) (Cyclosporin A-binding protein) (Rotamase A) (SP18) [Cleaved into: Peptidyl-prolyl cis-trans isomerase A, N-terminally processed]
Q64475	Hist1h2bb	0.78783,	0.79	2	Histone H2B type 1-B (h2B-143)
Q6ZWY9	Hist1h2bc; Hist1h2be; Hist1h2bg	0.78783,	0.79	2	Histone H2B type 1-C/E/G
P10853	Hist1h2bf H2b-f; Hist1h2bj H2b-j; Hist1h2bl H2b-l; Hist1h2bn H2b-n	0.78783,	0.79	2	Histone H2B type 1-F/J/L (H2B 291A)
Q64478	Hist1h2bh	0.78783,	0.79	2	Histone H2B type 1-H (h2B-221)
Q8CGP1	Hist1h2bk	0.78783,	0.79	2	Histone H2B type 1-K
P10854	Hist1h2bm	0.78783,	0.79	2	Histone H2B type 1-M (H2B 291B)
Q8CGP2	Hist1h2bp	0.78783,	0.79	2	Histone H2B type 1-P
Q64525	Hist2h2bb	0.78783,	0.79	2	Histone H2B type 2-B (H2b 616)
Q64524	Hist2h2be	0.78783,	0.79	2	Histone H2B type 2-E (H2b 613)
Q9D2U9	Hist3h2ba	0.78783,	0.79	2	Histone H2B type 3-A
Q9ERD7	Tubb3	0.68881,0.92924,1.48642,0.80196,0.79919,	0.8	26	Tubulin beta-3 chain
Q9D6F9	Tubb4a Tubb4	0.80196,0.79919,	0.8	61	Tubulin beta-4A chain (Tubulin beta-4 chain)
Q922F4	Tubb6	0.80196,0.79919,	0.8	22	Tubulin beta-6 chain
P14152	Mdh1 Mor2	0.70109,0.58196,0.93309,0.92707,0.99749,1.17556,0.8355,0.80074,0.80663,0.8797,0.75835,	0.84	15	Malate dehydrogenase, cytoplasmic (EC 1.1.1.37) (Cytosolic malate dehydrogenase)
P40142	Tkt	0.83935,	0.84	91	Transketolase (TK) (EC 2.2.1.1) (P68)
P68372	Tubb4b Tubb2c	0.68881,0.97216,0.92924,1.48642,0.80196,0.79919,	0.86	67	Tubulin beta-4B chain (Tubulin beta-2C chain)
P99024	Tubb5	0.68881,0.97216,0.92924,1.48642,0.80196,0.79919,	0.86	56	Tubulin beta-5 chain
P97461	Rps5	0.86648,	0.87	3	40S ribosomal protein S5 [Cleaved into: 40S ribosomal protein S5, N-terminally processed]
P62806	Hist1h4a; Hist1h4b H4-53; Hist1h4c H4-12; Hist1h4d; Hist1h4f; Hist1h4h; Hist1h4i; Hist1h4j; Hist1h4k; Hist1h4m; Hist2h4a Hist2h4; Hist4h4	0.88138,	0.88	4	Histone H4
O08553	Dpysl2 Crmp2 Ulip2	0.89443,	0.89	14	Dihydropyrimidinase-related protein 2 (DRP-2) (Unc-33-like phosphoprotein 2) (ULIP-2)
Q8CGA0	Ppm1f	0.89071,	0.89	3	Protein phosphatase 1F (EC 3.1.3.16) (Ca(2+)/calmodulin-dependent protein kinase phosphatase) (CaM-kinase phosphatase) (CaMKPase)
Q9ET01	Pygl	0.91339,0.86102,	0.89	26	Glycogen phosphorylase, liver form (EC 2.4.1.1)
Q7TMM9	Tubb2a Tubb2	0.68881,0.97216,0.92924,1.48642,1.61258,0.80196,0.79919,	0.93	66	Tubulin beta-2A chain
Q9CWF2	Tubb2b	0.68881,0.97216,0.92924,1.48642,1.61258,0.80196,0.79919,	0.93	63	Tubulin beta-2B chain
Q6ZQ73	Cand2 Kiaa0667 Tip120b	2.09482,0.42125,	0.94	11	Cullin-associated NEDD8-dissociated protein 2 (Cullin-associated and neddylation-dissociated protein 2) (TBP-interacting protein of 120 kDa B) (TBP-interacting protein 120B) (p120 CAND2)
P62702	Rps4x Rps4	0.95702,	0.96	7	40S ribosomal protein S4, X isoform
Q922R8	Pdia6 Txndc7	1.04107,	1.04	11	Protein disulfide-isomerase A6 (EC 5.3.4.1) (Thioredoxin domain-containing protein 7)
Q9DCD0	Pgd	1.04993,	1.05	11	6-phosphogluconate dehydrogenase, decarboxylating (EC 1.1.1.44)
P84078	Arf1	2.44273,0.45806,	1.06	14	ADP-ribosylation factor 1
Q8BSL7	Arf2	2.44273,0.45806,	1.06	10	ADP-ribosylation factor 2
P61205	Arf3	2.44273,0.45806,	1.06	14	ADP-ribosylation factor 3
P61750	Arf4	2.44273,0.45806,	1.06	12	ADP-ribosylation factor 4
P84084	Arf5	2.44273,0.45806,	1.06	16	ADP-ribosylation factor 5
Q62465	Vat1 Vat-1	0.7839,1.43748,	1.06	4	Synaptic vesicle membrane protein VAT-1 homolog (EC 1.-.-.-)
Q8R0W0	Eppk1 EPPK	1.06806,	1.07	2	Epiplakin
P25444	Rps2 Llrep3 Rps4	1.07818,	1.08	10	40S ribosomal protein S2 (40S ribosomal protein S4) (Protein LLRep3)
Q78ZA7	Nap1l4	1.08681,	1.09	13	Nucleosome assembly protein 1-like 4
Q9QUI0	Rhoa Arha Arha2	1.12477,	1.12	3	Transforming protein RhoA
Q6R0H6	Gnas Gnas1	1.1432,	1.14	8	Protein ALEX (Alternative gene product encoded by XL-exon)
Q6R0H7	Gnas Gnas1	1.1432,	1.14	8	Guanine nucleotide-binding protein G(s) subunit alpha isoforms XLas (Adenylate cyclase-stimulating G alpha protein) (Extra large alphas protein) (XLalphas)
P63094	Gnas Gnas1 MNCb-5546	1.1432,	1.14	8	Guanine nucleotide-binding protein G(s) subunit alpha isoforms short (Adenylate cyclase-stimulating G alpha protein)
P62696	Crybb2	1.51678,2.03247,1.45219,0.98098,1.05509,1.04511,1.15527,1.16119,1.04293,0.97157,0.69613,0.70282,2.16569,1.22125,1.22628,	1.16	655	Beta-crystallin B2 (Beta-B2 crystallin) (Beta-crystallin Bp)
Q9QXS1	Plec Plec1	2.81102,1.06806,0.50014,1.26826,	1.16	34	Plectin (PCN) (PLTN) (Plectin-1) (Plectin-6)
Q9D1U0	Grifin	1.22667,1.14924,	1.19	20	Grifin (Galectin-related inter-fiber protein)
P54775	Psmc4 Tbp7	1.20973,	1.21	8	26S proteasome regulatory subunit 6B (26S proteasome AAA-ATPase subunit RPT3) (CIP21) (MB67-interacting protein) (MIP224) (Proteasome 26S subunit ATPase 4) (Tat-binding protein 7) (TBP-7)
P62334	Psmc6 Sug2	1.20596,	1.21	3	26S proteasome regulatory subunit 10B (26S proteasome AAA-ATPase subunit RPT4) (Proteasome 26S subunit ATPase 6) (Proteasome subunit p42)
P23927	Cryab Crya2	1.84198,2.70162,1.15038,1.08595,1.2217,1.08817,1.07717,1.09088,0.77322,1.95677,1.69483,1.49717,1.55387,	1.22	1052	Alpha-crystallin B chain (Alpha(B)-crystallin) (P23)
Q9DCL9	Paics	1.24725,1.83475,1.23903,1.08054,	1.24	21	Multifunctional protein ADE2 [Includes: Phosphoribosylaminoimidazole-succinocarboxamide synthase (EC 6.3.2.6) (SAICAR synthetase); Phosphoribosylaminoimidazole carboxylase (EC 4.1.1.21) (AIR carboxylase) (AIRC)]
Q9CPU0	Glo1	1.28671,	1.29	9	Lactoylglutathione lyase (EC 4.4.1.5) (Aldoketomutase) (Glyoxalase I) (Glx I) (Ketone-aldehyde mutase) (Methylglyoxalase) (S-D-lactoylglutathione methylglyoxal lyase)
P05214	Tuba3a Tuba3; Tuba3b Tuba7	1.00392,1.11018,1.3308,1.31693,2.83873,2.51377,0.74701,1.64175,	1.32	85	Tubulin alpha-3 chain (Alpha-tubulin 3/7) (Alpha-tubulin isotype M-alpha-3/7) (Tubulin alpha-3/alpha-7 chain) [Cleaved into: Detyrosinated tubulin alpha-3 chain]
Q9JJZ2	Tuba8	1.3308,1.31693,0.74701,1.64175,	1.32	56	Tubulin alpha-8 chain (Alpha-tubulin 8)
P05213	Tuba1b Tuba2	1.00392,1.11018,1.3308,1.31693,2.83873,2.51377,0.74701,1.64175,	1.33	99	Tubulin alpha-1B chain (Alpha-tubulin 2) (Alpha-tubulin isotype M-alpha-2) (Tubulin alpha-2 chain) [Cleaved into: Detyrosinated tubulin alpha-1B chain]
P68373	Tuba1c Tuba6	1.3308,1.31693,0.74701,1.70821,1.64175,	1.33	96	Tubulin alpha-1C chain (Alpha-tubulin 6) (Alpha-tubulin isotype M-alpha-6) (Tubulin alpha-6 chain) [Cleaved into: Detyrosinated tubulin alpha-1C chain]
P68368	Tuba4a Tuba4	1.00392,1.11018,1.3308,1.31693,1.91919,2.09941,0.74701,1.70821,1.64175,	1.33	79	Tubulin alpha-4A chain (Alpha-tubulin 4) (Alpha-tubulin isotype M-alpha-4) (Tubulin alpha-4 chain)
P08122	Col4a2	1.3308,1.31693,0.74701,1.70821,1.64175,	1.34	32	Collagen alpha-2(IV) chain [Cleaved into: Canstatin]
Q9QZS0	Col4a3	1.00392,1.11018,1.3308,1.31693,1.91919,2.09941,0.74701,1.70821,1.64175,	1.34	4	Collagen alpha-3(IV) chain [Cleaved into: Tumstatin]
P51180	Mip Palm	1.00392,1.11018,1.3308,1.31693,1.91919,2.09941,0.74701,1.70821,1.64175,	1.34	42	Lens fiber major intrinsic protein (Aquaporin-0) (MIP26) (MP26)
P62983	Rps27a Uba80 Ubcep1	1.33932,	1.34	3	Ubiquitin-40S ribosomal protein S27a (Ubiquitin carboxyl extension protein 80) [Cleaved into: Ubiquitin; 40S ribosomal protein S27a]
P62984	Uba52 Ubcep2	1.33932,	1.34	3	Ubiquitin-60S ribosomal protein L40 (Ubiquitin A-52 residue ribosomal protein fusion product 1) [Cleaved into: Ubiquitin; 60S ribosomal protein L40 (CEP52)]
P0CG49	Ubb	1.33932,	1.34	3	Polyubiquitin-B [Cleaved into: Ubiquitin]
P0CG50	Ubc	1.33932,	1.34	3	Polyubiquitin-C [Cleaved into: Ubiquitin; Ubiquitin-related 1; Ubiquitin-related 2]
P62835	Rap1a Krev-1	1.35609,	1.36	2	Ras-related protein Rap-1A (Ras-related protein Krev-1)
Q99JI6	Rap1b	1.35609,	1.36	2	Ras-related protein Rap-1b (GTP-binding protein smg p21B)
Q9QYC0	Add1	1.38375,	1.38	2	Alpha-adducin (Erythrocyte adducin subunit alpha)
P16858	Gapdh Gapd	1.3635,2.03692,2.40998,1.37906,1.08655,	1.38	100	Glyceraldehyde-3-phosphate dehydrogenase (GAPDH) (EC 1.2.1.12) (Peptidyl-cysteine S-nitrosylase GAPDH) (EC 2.6.99.-)
O70310	Nmt1	1.397,	1.4	8	Glycylpeptide N-tetradecanoyltransferase 1 (EC 2.3.1.97) (Myristoyl-CoA:protein N-myristoyltransferase 1) (NMT 1) (Type I N-myristoyltransferase) (Peptide N-myristoyltransferase 1)
O70311	Nmt2	1.397,	1.4	2	Glycylpeptide N-tetradecanoyltransferase 2 (EC 2.3.1.97) (Myristoyl-CoA:protein N-myristoyltransferase 2) (NMT 2) (Peptide N-myristoyltransferase 2) (Type II N-myristoyltransferase)
P14901	Hmox1	1.46883,	1.47	5	Heme oxygenase 1 (HO-1) (EC 1.14.14.18) (P32 protein)
P18760	Cfl1	1.49335,	1.49	8	Cofilin-1 (Cofilin, non-muscle isoform)
P02463	Col4a1	1.97499,1.57937,1.63807,0.7996,1.4539,1.32719,	1.52	62	Collagen alpha-1(IV) chain [Cleaved into: Arresten]
Q7TQI3	Otub1	1.53689,	1.54	5	Ubiquitin thioesterase OTUB1 (EC 3.4.19.12) (Deubiquitinating enzyme OTUB1) (OTU domain-containing ubiquitin aldehyde-binding protein 1) (Otubain-1) (Ubiquitin-specific-processing protease OTUB1)
Q9CZM2	Rpl15	1.5526,	1.55	6	60S ribosomal protein L15
P17751	Tpi1 Tpi	2.17352,1.11586,	1.56	14	Triosephosphate isomerase (TIM) (EC 5.3.1.1) (Methylglyoxal synthase) (EC 4.2.3.3) (Triose-phosphate isomerase)
P13707	Gpd1 Gdc-1 Gdc1 Kiaa4010	1.62872,1.65905,	1.64	13	Glycerol-3-phosphate dehydrogenase [NAD(+)], cytoplasmic (GPD-C) (GPDH-C) (EC 1.1.1.8)
P68369	Tuba1a Tuba1	1.00392,1.11018,1.3308,1.31693,1.91919,2.09941,2.83873,2.51377,0.74701,1.70821,1.64175,	1.64	102	Tubulin alpha-1A chain (Alpha-tubulin 1) (Alpha-tubulin isotype M-alpha-1) (Tubulin alpha-1 chain) [Cleaved into: Detyrosinated tubulin alpha-1A chain]
P05063	Aldoc Aldo3 Scrg2	1.35658,1.65116,1.93333,	1.65	42	Fructose-bisphosphate aldolase C (EC 4.1.2.13) (Aldolase 3) (Brain-type aldolase) (Scrapie-responsive protein 2) (Zebrin II)
Q9CZ04	Cops7a Csn7a	1.6546,	1.65	5	COP9 signalosome complex subunit 7a (SGN7a) (Signalosome subunit 7a) (JAB1-containing signalosome subunit 7a)
P62737	Acta2 Actsa Actvs	1.5399,1.66906,2.06325,	1.67	17	Actin, aortic smooth muscle (Alpha-actin-2) [Cleaved into: Actin, aortic smooth muscle, intermediate form]
P63268	Actg2 Acta3 Actsg	1.5399,1.66906,2.06325,	1.67	17	Actin, gamma-enteric smooth muscle (Alpha-actin-3) (Gamma-2-actin) (Smooth muscle gamma-actin) [Cleaved into: Actin, gamma-enteric smooth muscle, intermediate form]
A2AMT1	Bfsp1	3.83316,1.99815,2.24228,2.42315,2.26575,10.61075,5.77527,0.40663,0.35201,1.41755,1.34588,1.12808,0.91443,0.86854,	1.68	137	Filensin (Beaded filament structural protein 1) (Lens fiber cell beaded-filament structural protein CP 95) (CP95)
Q3UX10	Tubal3	1.70821,	1.71	2	Tubulin alpha chain-like 3
Q99LG2	Tnpo2	1.49058,1.9926,	1.72	5	Transportin-2 (Karyopherin beta-2b)
P68134	Acta1 Acta	1.5399,1.66906,1.79181,2.06325,	1.73	27	Actin, alpha skeletal muscle (Alpha-actin-1) [Cleaved into: Actin, alpha skeletal muscle, intermediate form]
P68033	Actc1 Actc	1.5399,1.66906,1.79181,2.06325,	1.73	27	Actin, alpha cardiac muscle 1 (Alpha-cardiac actin) [Cleaved into: Actin, alpha cardiac muscle 1, intermediate form]
P05064	Aldoa Aldo1	1.76458,	1.76	18	Fructose-bisphosphate aldolase A (EC 4.1.2.13) (Aldolase 1) (Muscle-type aldolase)
P61202	Cops2 Csn2 Trip15	1.50379,2.11611,	1.78	7	COP9 signalosome complex subunit 2 (SGN2) (Signalosome subunit 2) (Alien homolog) (JAB1-containing signalosome subunit 2) (Thyroid receptor-interacting protein 15) (TR-interacting protein 15) (TRIP-15)
Q99LX0	Park7	1.72938,1.83502,	1.78	19	Protein/nucleic acid deglycase DJ-1 (EC 3.1.2.-) (EC 3.5.1.-) (EC 3.5.1.124) (Maillard deglycase) (Parkinson disease protein 7 homolog) (Parkinsonism-associated deglycase) (Protein DJ-1) (DJ-1)
P07356	Anxa2 Anx2 Cal1h	1.6935,1.917,	1.8	14	Annexin A2 (Annexin II) (Annexin-2) (Calpactin I heavy chain) (Calpactin-1 heavy chain) (Chromobindin-8) (Lipocortin II) (Placental anticoagulant protein IV) (PAP-IV) (Protein I) (p36)
P68254	Ywhaq	1.64256,1.68576,1.93766,2.44219,	1.81	18	14-3-3 protein theta (14-3-3 protein tau)
P19639	Gstm3	1.81654,	1.82	12	Glutathione S-transferase Mu 3 (EC 2.5.1.18) (GST class-mu 3) (Glutathione S-transferase GT9.3)
Q61696	Hspa1a Hsp70-3 Hsp70A1	1.86673,	1.87	10	Heat shock 70 kDa protein 1A (Heat shock 70 kDa protein 3) (HSP70.3) (Hsp68)
P17879	Hspa1b Hcp70.1 Hsp70-1 Hsp70a1 Hspa1	1.86673,	1.87	10	Heat shock 70 kDa protein 1B (Heat shock 70 kDa protein 1) (HSP70.1)
P10126	Eef1a1 Eef1a	1.87539,2.11099,2.09502,2.09502,1.38968,0.66749,1.05147,	1.88	72	Elongation factor 1-alpha 1 (EF-1-alpha-1) (Elongation factor Tu) (EF-Tu) (Eukaryotic elongation factor 1 A-1) (eEF1A-1)
Q9R1P0	Psma4	1.90096,1.90926,	1.91	11	Proteasome subunit alpha type-4 (EC 3.4.25.1) (Macropain subunit C9) (Multicatalytic endopeptidase complex subunit C9) (Proteasome component C9) (Proteasome subunit L)
P63321	Rala Ral Ral-a	1.91706,	1.92	3	Ras-related protein Ral-A
Q9JIW9	Ralb	1.91706,	1.92	3	Ras-related protein Ral-B
Q99PT1	Arhgdia C87222 Gdi1	1.93791,	1.94	5	Rho GDP-dissociation inhibitor 1 (Rho GDI 1) (GDI-1) (Rho-GDI alpha)
Q9D0F9	Pgm1 Pgm2	2.44926,1.57798,	1.97	11	Phosphoglucomutase-1 (PGM 1) (EC 5.4.2.2) (Glucose phosphomutase 1) (Phosphoglucomutase-2)
P61982	Ywhag	0.96858,2.07702,1.8716,2.44219,	1.97	23	14-3-3 protein gamma [Cleaved into: 14-3-3 protein gamma, N-terminally processed]
P60710	Actb	1.79181,1.97659,1.86557,3.37321,1.91847,2.5671,1.67004,1.68294,2.06325,2.0063,2.09662,1.97132,2.01774,2.02063,	1.99	183	Actin, cytoplasmic 1 (Beta-actin) [Cleaved into: Actin, cytoplasmic 1, N-terminally processed]
P63260	Actg1 Actg	1.79181,1.97659,1.86557,3.37321,1.91847,2.5671,1.67004,1.68294,2.06325,2.0063,2.09662,1.97132,2.01774,2.02063,	1.99	183	Actin, cytoplasmic 2 (Gamma-actin) [Cleaved into: Actin, cytoplasmic 2, N-terminally processed]
P24622	Cryaa Crya1	2.42486,1.98752,1.95912,2.05136,3.37918,1.37905,1.55951,0.88281,0.71409,2.10077,1.33837,0.9426,3.57129,3.53308,1.06258,1.47793,2.06579,1.65849,	1.99	1236	Alpha-crystallin A chain
Q6NVD9	Bfsp2	2.08413,2.08413,1.95267,2.41776,2.19402,1.40404,0.79654,1.19056,1.23012,	2.02	128	Phakinin (49 kDa cytoskeletal protein) (Beaded filament structural protein 2) (Lens fiber cell beaded filament protein CP 49) (CP49)
Q02053	Uba1 Sbx Ube1 Ube1ax Ube1x	1.84507,1.18126,2.03775,2.12562,2.35223,	2.04	21	Ubiquitin-like modifier-activating enzyme 1 (EC 6.2.1.45) (Ubiquitin-activating enzyme E1) (Ubiquitin-activating enzyme E1 X) (Ubiquitin-like modifier-activating enzyme 1 X)
P26040	Ezr Vil2	2.05022,	2.05	32	Ezrin (Cytovillin) (Villin-2) (p81)
Q8BFZ3	Actbl2	3.37321,1.91847,2.06325,	2.06	54	Beta-actin-like protein 2 (Kappa-actin)
Q9CQV8	Ywhab	1.73184,2.44219,	2.06	11	14-3-3 protein beta/alpha (Protein kinase C inhibitor protein 1) (KCIP-1) [Cleaved into: 14-3-3 protein beta/alpha, N-terminally processed]
Q68FD5	Cltc	2.65232,2.69849,1.62638,1.63036,	2.08	61	Clathrin heavy chain 1
P62631	Eef1a2 Eef1al Stn	2.09502,2.09502,	2.1	22	Elongation factor 1-alpha 2 (EF-1-alpha-2) (Eukaryotic elongation factor 1 A-2) (eEF1A-2) (Statin-S1)
P13020	Gsn Gsb	1.34613,1.37674,3.63079,2.31462,4.61868,1.94505,0.63682,3.07169,	2.12	63	Gelsolin (Actin-depolymerizing factor) (ADF) (Brevin)
P61164	Actr1a Ctrn1	1.46602,2.16443,2.37429,	2.16	11	Alpha-centractin (Centractin) (ARP1) (Actin-RPV) (Centrosome-associated actin homolog)
P10649	Gstm1	2.68623,1.81654,	2.21	18	Glutathione S-transferase Mu 1 (EC 2.5.1.18) (GST 1-1) (GST class-mu 1) (Glutathione S-transferase GT8.7) (pmGT10)
Q62261	Sptbn1 Elf Spnb-2 Spnb2 Sptb2	2.20588,2.17561,1.67893,2.43659,	2.21	107	Spectrin beta chain, non-erythrocytic 1 (Beta-II spectrin) (Embryonic liver fodrin) (Fodrin beta chain)
Q04447	Ckb Ckbb	3.03087,1.61886,	2.22	14	Creatine kinase B-type (EC 2.7.3.2) (B-CK) (Creatine kinase B chain) (Creatine phosphokinase B-type) (CPK-B)
P02469	Lamb1 Lamb-1 Lamb1-1	2.23752,	2.24	16	Laminin subunit beta-1 (Laminin B1 chain) (Laminin-1 subunit beta) (Laminin-10 subunit beta) (Laminin-12 subunit beta) (Laminin-2 subunit beta) (Laminin-6 subunit beta) (Laminin-8 subunit beta)
P16627	Hspa1l Hsc70t	1.86673,2.73593,	2.26	7	Heat shock 70 kDa protein 1-like (Heat shock 70 kDa protein 1L) (Heat shock 70 kDa-like protein 1) (Spermatid-specific heat shock protein 70)
Q8R5C5	Actr1b	2.16443,2.37429,	2.27	7	Beta-centractin (Actin-related protein 1B) (ARP1B)
O35639	Anxa3 Anx3	2.26816,	2.27	14	Annexin A3 (35-alpha calcimedin) (Annexin III) (Annexin-3) (Lipocortin III) (Placental anticoagulant protein III) (PAP-III)
P24549	Aldh1a1 Ahd-2 Ahd2 Aldh1	2.16443,2.37429,	2.3	72	Retinal dehydrogenase 1 (RALDH 1) (RalDH1) (EC 1.2.1.-) (EC 1.2.1.36) (ALDH-E1) (ALHDII) (Aldehyde dehydrogenase family 1 member A1) (Aldehyde dehydrogenase, cytosolic)
Q80X95	Rraga	2.3005,	2.3	3	Ras-related GTP-binding protein A (Rag A) (RagA)
O35945	Aldh1a7 Aldh-pb	2.31241,	2.31	35	Aldehyde dehydrogenase, cytosolic 1 (EC 1.2.1.3) (ALDH class 1) (ALDH-E1) (ALHDII) (Aldehyde dehydrogenase family 1 member A7) (Aldehyde dehydrogenase phenobarbital-inducible)
Q9DCH4	Eif3f Eif3s5	2.14425,2.54556,	2.34	7	Eukaryotic translation initiation factor 3 subunit F (eIF3f) (Deubiquitinating enzyme eIF3f) (EC 3.4.19.12) (Eukaryotic translation initiation factor 3 subunit 5) (eIF-3-epsilon) (eIF3 p47)
Q5FWK3	Arhgap1	2.36321,	2.36	3	Rho GTPase-activating protein 1 (Rho-type GTPase-activating protein 1)
P62259	Ywhae	2.35635,2.34115,1.66496,2.08311,2.59455,2.59455,2.44219,	2.36	32	14-3-3 protein epsilon (14-3-3E)
P14869	Rplp0 Arbp	2.41123,	2.41	13	60S acidic ribosomal protein P0 (60S ribosomal protein L10E)
O70456	Sfn Mkrn3	2.44219,	2.44	6	14-3-3 protein sigma (Stratifin)
P68510	Ywhah	3.44166,2.43721,1.94706,2.44219,	2.44	19	14-3-3 protein eta
P07901	Hsp90aa1 Hsp86 Hsp86-1 Hspca	2.63828,2.42401,2.45165,	2.45	25	Heat shock protein HSP 90-alpha (Heat shock 86 kDa) (HSP 86) (HSP86) (Tumor-specific transplantation 86 kDa antigen) (TSTA)
P70398	Usp9x Fafl Fam	2.48594,	2.49	4	Probable ubiquitin carboxyl-terminal hydrolase FAF-X (EC 3.4.19.12) (Deubiquitinating enzyme FAF-X) (Fat facets homolog) (Fat facets protein-related, X-linked) (Ubiquitin carboxyl-terminal hydrolase FAM) (Ubiquitin thioesterase FAF-X) (Ubiquitin-specific protease 9, X chromosome) (Ubiquitin-specific-processing protease FAF-X)
Q8K274	Fn3krp	2.5006,	2.5	4	Ketosamine-3-kinase (EC 2.7.1.-) (Fructosamine-3-kinase-related protein)
Q01853	Vcp	2.50538,2.24036,2.26657,2.26844,2.08005,1.95847,2.09341,2.68458,	2.51	75	Transitional endoplasmic reticulum ATPase (TER ATPase) (EC 3.6.4.6) (15S Mg(2+)-ATPase p97 subunit) (Valosin-containing protein) (VCP)
P17156	Hspa2 Hcp70.2 Hsp70-2	1.86673,2.73593,2.57134,	2.57	20	Heat shock-related 70 kDa protein 2 (Heat shock protein 70.2)
P63017	Hspa8 Hsc70 Hsc73	5.02269,2.60334,1.86673,2.18691,2.44372,2.73593,2.57134,	2.57	72	Heat shock cognate 71 kDa protein (Heat shock 70 kDa protein 8)
Q61001	Lama5	2.42543,2.74555,	2.58	14	Laminin subunit alpha-5 (Laminin-10 subunit alpha) (Laminin-11 subunit alpha) (Laminin-15 subunit alpha)
P70168	Kpnb1 Impnb	3.94251,3.33566,1.59615,2.42562,2.22,2.77683,	2.6	64	Importin subunit beta-1 (Karyopherin subunit beta-1) (Nuclear factor p97) (Pore targeting complex 97 kDa subunit) (PTAC97) (SCG)
P06151	Ldha Ldh-1 Ldh1	3.26748,2.61256,3.23626,2.56123,2.37303,	2.61	28	L-lactate dehydrogenase A chain (LDH-A) (EC 1.1.1.27) (LDH muscle subunit) (LDH-M)
Q9DCT1	Akr1e2 Akr1cl2 Akr1e1	2.62141,	2.62	2	1,5-anhydro-D-fructose reductase (AF reductase) (EC 1.1.1.263) (Aldo-keto reductase family 1 member C-like protein 2) (Aldo-keto reductase family 1 member E1) (Aldo-keto reductase family 1 member E2)
P60229	Eif3e Eif3s6 Int6	2.94199,2.35589,	2.63	9	Eukaryotic translation initiation factor 3 subunit E (eIF3e) (Eukaryotic translation initiation factor 3 subunit 6) (MMTV integration site 6) (Mammary tumor-associated protein INT-6) (Viral integration site protein INT-6) (eIF-3 p48)
P11499	Hsp90ab1 Hsp84 Hsp84-1 Hspcb	2.60483,2.63828,4.2895,	2.64	36	Heat shock protein HSP 90-beta (Heat shock 84 kDa) (HSP 84) (HSP84) (Tumor-specific transplantation 84 kDa antigen) (TSTA)
Q9JJV1	Cryba2	2.21168,5.29153,2.28575,15.48797,2.58157,2.78354,2.54829,5.31198,1.73569,	2.68	349	Beta-crystallin A2 (Beta-A2 crystallin)
P99026	Psmb4 Lmp3	2.69809,	2.7	7	Proteasome subunit beta type-4 (EC 3.4.25.1) (Low molecular mass protein 3) (Macropain beta chain) (Multicatalytic endopeptidase complex beta chain) (Proteasome beta chain) (Proteasome chain 3)
Q9Z0S1	Bpnt1	2.73332,	2.73	7	3'(2'),5'-bisphosphate nucleotidase 1 (EC 3.1.3.7) (Bisphosphate 3'-nucleotidase 1) (PAP-inositol 1,4-phosphatase) (PIP)
Q9CQI6	Cotl1 Clp	3.61774,2.05801,	2.73	21	Coactosin-like protein
Q9JHU4	Dync1h1 Dhc1 Dnch1 Dnchc1 Dyhc	2.73593,	2.74	70	Cytoplasmic dynein 1 heavy chain 1 (Cytoplasmic dynein heavy chain 1) (Dynein heavy chain, cytosolic)
P20029	Hspa5 Grp78	2.73593,	2.74	5	Endoplasmic reticulum chaperone BiP (EC 3.6.4.10) (78 kDa glucose-regulated protein) (GRP-78) (Binding-immunoglobulin protein) (BiP) (Heat shock protein 70 family protein 5) (HSP70 family protein 5) (Heat shock protein family A member 5) (Immunoglobulin heavy chain-binding protein)
P80317	Cct6a Cct6 Cctz Cctz1	2.30692,3.29145,	2.76	19	T-complex protein 1 subunit zeta (TCP-1-zeta) (CCT-zeta-1)
P11983	Tcp1 Cct1 Ccta	2.40611,3.22703,2.05836,3.22703,	2.79	20	T-complex protein 1 subunit alpha (TCP-1-alpha) (CCT-alpha) (Tailless complex polypeptide 1A) (TCP-1-A) (Tailless complex polypeptide 1B) (TCP-1-B)
Q9WVJ2	Psmd13	2.79587,	2.8	5	26S proteasome non-ATPase regulatory subunit 13 (26S proteasome regulatory subunit RPN9) (26S proteasome regulatory subunit S11) (26S proteasome regulatory subunit p40.5)
Q91VC3	Eif4a3 Ddx48	2.8199,	2.82	4	Eukaryotic initiation factor 4A-III (eIF-4A-III) (eIF4A-III) (EC 3.6.4.13) (ATP-dependent RNA helicase DDX48) (ATP-dependent RNA helicase eIF4A-3) (DEAD box protein 48) (Eukaryotic translation initiation factor 4A isoform 3) [Cleaved into: Eukaryotic initiation factor 4A-III, N-terminally processed]
P80314	Cct2 Cctb	2.83449,	2.83	29	T-complex protein 1 subunit beta (TCP-1-beta) (CCT-beta)
P16460	Ass1 Ass	1.7451,2.44076,1.44517,2.95777,2.73053,2.97248,3.22606,2.99423,	2.84	71	Argininosuccinate synthase (EC 6.3.4.5) (Citrulline--aspartate ligase)
Q9EPL8	Ipo7 Ranbp7	2.88804,	2.89	7	Importin-7 (Imp7) (Ran-binding protein 7) (RanBP7)
Q8BZF8	Pgm5	2.95481,	2.95	7	Phosphoglucomutase-like protein 5
P68433	Hist1h3a H3a; Hist1h3g H3.1-221 H3g; Hist1h3h H3.1-291 H3h; Hist1h3i H3.1-I H3i	2.9825,	2.98	6	Histone H3.1
P80316	Cct5 Ccte Kiaa0098	2.72163,3.2815,	2.99	11	T-complex protein 1 subunit epsilon (TCP-1-epsilon) (CCT-epsilon)
P10630	Eif4a2 Ddx2b	2.8199,3.19867,	3	10	Eukaryotic initiation factor 4A-II (eIF-4A-II) (eIF4A-II) (EC 3.6.4.13) (ATP-dependent RNA helicase eIF4A-2)
P63101	Ywhaz	2.98944,3.1304,	3.06	13	14-3-3 protein zeta/delta (Protein kinase C inhibitor protein 1) (KCIP-1) (SEZ-2)
P80313	Cct7 Ccth	2.16754,2.26659,	3.07	34	T-complex protein 1 subunit eta (TCP-1-eta) (CCT-eta)
Q8VDM4	Psmd2	3.83212,3.90154,2.49047,1.71795,	3.09	13	26S proteasome non-ATPase regulatory subunit 2 (26S proteasome regulatory subunit RPN1) (26S proteasome regulatory subunit S2) (26S proteasome subunit p97)
P60843	Eif4a1 Ddx2a Eif4a	2.8199,4.14067,4.13641,3.19867,2.00098,	3.2	32	Eukaryotic initiation factor 4A-I (eIF-4A-I) (eIF4A-I) (EC 3.6.4.13) (ATP-dependent RNA helicase eIF4A-1)
O88544	Cops4 Csn4	3.25475,	3.25	8	COP9 signalosome complex subunit 4 (SGN4) (Signalosome subunit 4) (JAB1-containing signalosome subunit 4)
P56563	Lim2	3.7487,2.81688,	3.25	10	Lens fiber membrane intrinsic protein (MP17) (MP18) (MP19) (MP20)
Q9R0P9	Uchl1	3.18078,3.27605,3.55064,	3.28	50	Ubiquitin carboxyl-terminal hydrolase isozyme L1 (UCH-L1) (EC 3.4.19.12) (EC 6.-.-.-) (Neuron cytoplasmic protein 9.5) (PGP 9.5) (PGP9.5) (Ubiquitin thioesterase L1)
Q9Z1Q9	Vars Bat6 G7a Vars2	3.36718,	3.37	8	Valine--tRNA ligase (EC 6.1.1.9) (Protein G7a) (Valyl-tRNA synthetase) (ValRS)
Q8C0C7	Farsa Farsla	3.49562,	3.5	2	Phenylalanine--tRNA ligase alpha subunit (EC 6.1.1.20) (Phenylalanyl-tRNA synthetase alpha subunit) (PheRS)
P08030	Aprt	3.59481,	3.59	8	Adenine phosphoribosyltransferase (APRT) (EC 2.4.2.7)
P48774	Gstm5 Fsc2 Gstm3	3.74759,	3.75	12	Glutathione S-transferase Mu 5 (EC 2.5.1.18) (Fibrous sheath component 2) (Fsc2) (GST class-mu 5)
P06745	Gpi Gpi1	3.23326,4.44794,	3.79	20	Glucose-6-phosphate isomerase (GPI) (EC 5.3.1.9) (Autocrine motility factor) (AMF) (Neuroleukin) (NLK) (Phosphoglucose isomerase) (PGI) (Phosphohexose isomerase) (PHI)
Q9DBJ1	Pgam1	4.01713,3.9284,	3.97	16	Phosphoglycerate mutase 1 (EC 5.4.2.11) (EC 5.4.2.4) (BPG-dependent PGAM 1) (Phosphoglycerate mutase isozyme B) (PGAM-B)
P52480	Pkm Pk3 Pkm2 Pykm	3.42962,2.91839,3.44884,9.09335,1.12276,1.7828,2.44846,4.04048,4.75908,3.90049,4.59209,	3.97	145	Pyruvate kinase PKM (EC 2.7.1.40) (Pyruvate kinase muscle isozyme)
P17182	Eno1 Eno-1	3.41741,3.94058,4.12914,3.04088,3.34578,3.1229,	4	107	Alpha-enolase (EC 4.2.1.11) (2-phospho-D-glycerate hydro-lyase) (Enolase 1) (Non-neural enolase) (NNE)
P84228	Hist1h3b H3-53 H3.2 H3b; Hist1h3c H3-143; Hist1h3d H3-B; Hist1h3e H3-F; Hist1h3f H3.2-221 H3f; Hist2h3b H3.2-616; Hist2h3c1 H3.2-615 Hist2h3ca1; Hist2h3c2 H3.2-614 Hist2h3ca2	3.39203,4.77042,	4.02	6	Histone H3.2
Q9DCJ9	Npl	4.04735,	4.05	27	N-acetylneuraminate lyase (NALase) (EC 4.1.3.3) (N-acetylneuraminate pyruvate-lyase) (N-acetylneuraminic acid aldolase) (Sialate lyase) (Sialate-pyruvate lyase) (Sialic acid aldolase) (Sialic acid lyase)
P17183	Eno2 Eno-2	3.41741,4.06613,5.9609,	4.07	34	Gamma-enolase (EC 4.2.1.11) (2-phospho-D-glycerate hydro-lyase) (Enolase 2) (Neural enolase) (Neuron-specific enolase) (NSE)
P21550	Eno3 Eno-3	3.41741,4.06613,5.9609,	4.07	39	Beta-enolase (EC 4.2.1.11) (2-phospho-D-glycerate hydro-lyase) (Enolase 3) (Muscle-specific enolase) (MSE) (Skeletal muscle enolase)
Q7TMY7	Ipo8	4.0801,	4.08	6	Importin-8 (Imp8) (Ran-binding protein 8) (RanBP8)
Q9CQ60	Pgls	4.78919,3.46999,	4.08	6	6-phosphogluconolactonase (6PGL) (EC 3.1.1.31)
Q05793	Hspg2	3.97508,5.56841,5.59728,4.10638,3.8897,3.8897,1.59329,0.39768,0.42127,	4.11	112	Basement membrane-specific heparan sulfate proteoglycan core protein (HSPG) [Cleaved into: Endorepellin; LG3 peptide]
O55234	Psmb5	4.21995,	4.22	3	Proteasome subunit beta type-5 (EC 3.4.25.1) (Macropain epsilon chain) (Multicatalytic endopeptidase complex epsilon chain) (Proteasome chain 6) (Proteasome epsilon chain) (Proteasome subunit X)
O35486	Crygs	2.60479,2.6423,4.6849,4.254,3.79159,3.43356,2.22001,4.63476,1.40299,4.33636,3.98031,5.32297,	4.27	394	Gamma-crystallin S (Beta-crystallin S) (Gamma-S-crystallin)
P49722	Psma2 Lmpc3	6.88518,2.7089,	4.32	11	Proteasome subunit alpha type-2 (EC 3.4.25.1) (Macropain subunit C3) (Multicatalytic endopeptidase complex subunit C3) (Proteasome component C3)
P09041	Pgk2 Pgk-2	NA	4.38	10	Phosphoglycerate kinase 2 (EC 2.7.2.3) (Phosphoglycerate kinase, testis specific)
Q9JLR9	Higd1a Hig1	4.41906,	4.42	2	HIG1 domain family member 1A, mitochondrial (Hypoxia-inducible gene 1 protein)
P34884	Mif	4.42023,	4.42	8	Macrophage migration inhibitory factor (MIF) (EC 5.3.2.1) (Delayed early response protein 6) (DER6) (Glycosylation-inhibiting factor) (GIF) (L-dopachrome isomerase) (L-dopachrome tautomerase) (EC 5.3.3.12) (Phenylpyruvate tautomerase)
P28474	Adh5 Adh-2 Adh2	4.44644,	4.45	15	Alcohol dehydrogenase class-3 (EC 1.1.1.1) (Alcohol dehydrogenase 2) (Alcohol dehydrogenase 5) (Alcohol dehydrogenase B2) (ADH-B2) (Alcohol dehydrogenase class-III) (Glutathione-dependent formaldehyde dehydrogenase) (FALDH) (FDH) (GSH-FDH) (EC 1.1.1.-) (S-(hydroxymethyl)glutathione dehydrogenase) (EC 1.1.1.284)
P15532	Nme1 Nm23	4.52474,	4.52	9	Nucleoside diphosphate kinase A (NDK A) (NDP kinase A) (EC 2.7.4.6) (Metastasis inhibition factor NM23) (NDPK-A) (Tumor metastatic process-associated protein) (nm23-M1)
Q8BJY1	Psmd5 Kiaa0072	4.58809,	4.59	1	26S proteasome non-ATPase regulatory subunit 5 (26S protease subunit S5 basic) (26S proteasome subunit S5B)
P14206	Rpsa Lamr1 P40-8	4.84089,	4.84	12	40S ribosomal protein SA (37 kDa laminin receptor precursor) (37LRP) (37 kDa oncofetal antigen) (37/67 kDa laminin receptor) (LRP/LR) (67 kDa laminin receptor) (67LR) (Laminin receptor 1) (LamR) (Laminin-binding protein precursor p40) (LBP/p40) (OFA/iLRP)
P58252	Eef2	2.62573,3.04606,3.99862,0.7965,8.60068,4.23123,8.74205,	4.86	76	Elongation factor 2 (EF-2)
Q9JJV0	Cryba4	4.88096,5.8305,2.01787,9.24,11.84736,4.6328,7.61799,4.53243,2.8879,3.79008,5.97238,5.63708,4.94531,5.74513,5.27383,	4.95	825	Beta-crystallin A4 (Beta-A4 crystallin)
P26043	Rdx	4.97754,	4.98	16	Radixin (ESP10)
Q61598	Gdi2 Gdi3	4.32608,5.0392,2.95661,3.45827,	5.04	79	Rab GDP dissociation inhibitor beta (Rab GDI beta) (GDI-3) (Guanosine diphosphate dissociation inhibitor 2) (GDI-2)
P09411	Pgk1 Pgk-1	4.67846,	5.18	54	Phosphoglycerate kinase 1 (EC 2.7.2.3)
P51855	Gss	5.45356,2.4684,3.45522,8.4385,3.0495,5.79603,	5.45	36	Glutathione synthetase (GSH synthetase) (GSH-S) (EC 6.3.2.3) (Glutathione synthase)
Q61597	Crygc Gammab-cry	5.42621,7.55686,5.97427,5.05945,5.2874,6.62024,6.17684,5.73334,5.67621,5.94197,2.40963,5.41225,8.04373,6.29217,6.53854,7.69106,5.44241,8.38152,4.16166,4.86738,	5.7	732	Gamma-crystallin C (Gamma-C-crystallin)
P04344	Crygb	5.42621,7.55686,5.97427,5.05945,5.2874,6.62024,6.17684,5.73334,5.67621,5.94197,2.40963,5.41225,8.04373,6.29217,6.53854,7.69106,5.19768,5.5291,3.82877,5.69248,6.40468,4.07274,6.69687,4.02466,11.45105,5.60062,	5.94	801	Gamma-crystallin B (Gamma-B-crystallin) (Gamma-crystallin 3)
P19157	Gstp1 Gstpib	5.94107,	5.94	26	Glutathione S-transferase P 1 (Gst P1) (EC 2.5.1.18) (GST YF-YF) (GST class-pi) (GST-piB) (Preadipocyte growth factor)
P46425	Gstp2 Gstpia	5.94107,	5.94	13	Glutathione S-transferase P 2 (Gst P2) (EC 2.5.1.18) (GST YF-YF) (GST class-pi) (GST-piA)
Q64737	Gart	6.25618,	6.26	1	Trifunctional purine biosynthetic protein adenosine-3 [Includes: Phosphoribosylamine--glycine ligase (EC 6.3.4.13) (Glycinamide ribonucleotide synthetase) (GARS) (Phosphoribosylglycinamide synthetase); Phosphoribosylformylglycinamidine cyclo-ligase (EC 6.3.3.1) (AIR synthase) (AIRS) (Phosphoribosyl-aminoimidazole synthetase); Phosphoribosylglycinamide formyltransferase (EC 2.1.2.2) (5'-phosphorib…
Q9D8N0	Eef1g	11.52302,4.01586,	6.8	22	Elongation factor 1-gamma (EF-1-gamma) (eEF-1B gamma)
P28236	Gja8	7.19476,	7.19	8	Gap junction alpha-8 protein (Connexin-50) (Cx50) (Lens fiber protein MP70)
Q05816	Fabp5 Fabpe Klbp Mal1	4.64816,2.82478,	7.54	133	Fatty acid-binding protein 5 (Epidermal-type fatty acid-binding protein) (E-FABP) (Fatty acid-binding protein, epidermal) (Keratinocyte lipid-binding protein) (Psoriasis-associated fatty acid-binding protein homolog) (PA-FABP)
Q9WVJ5	Crybb1	2.44682,5.0132,5.3465,4.44452,11.6364,4.99524,5.1292,10.42183,8.80333,7.53683,8.88745,19.4646,14.72225,5.69651,1.35485,1.77307,1.81853,	8.8	917	Beta-crystallin B1 (Beta-B1 crystallin) [Cleaved into: Beta-crystallin B1B]
P04342	Crygd	8.89373,5.85649,3.80342,9.98498,19.63001,5.79337,4.76176,5.63542,5.61627,11.45105,14.93369,12.93993,17.12456,	8.89	660	Gamma-crystallin D (Gamma-D-crystallin) (Gamma-crystallin 1)
P47911	Rpl6	9.03185,	9.03	5	60S ribosomal protein L6 (TAX-responsive enhancer element-binding protein 107) (TAXREB107)
Q9JJU9	Crybb3	7.70671,7.16341,9.66546,17.76789,9.65122,13.46549,8.6436,7.32349,13.81544,	9.13	459	Beta-crystallin B3 (Beta-B3 crystallin) [Cleaved into: Beta-crystallin B3, N-terminally processed]
Q8BKC5	Ipo5 Kpnb3 Ranbp5	4.12772,14.81859,5.66998,10.30621,15.02383,8.52482,5.60999,	10.31	113	Importin-5 (Imp5) (Importin subunit beta-3) (Karyopherin beta-3) (Ran-binding protein 5) (RanBP5)
Q64691	Capn3	4.12872,	18.18	24	Calpain-3 (EC 3.4.22.54) (Calcium-activated neutral proteinase 3) (CANP 3) (Calpain L3) (Calpain p94) (Muscle-specific calcium-activated neutral protease 3)
P04345	Cryga	7.55686,5.97427,5.05945,5.2874,6.62024,	20	328	Gamma-crystallin A (Gamma-A-crystallin) (Gamma-crystallin 4)
Q03740	Cryge	19.63001,43.25735,51.80495,11.45105,14.93369,12.93993,17.12456,	20	707	Gamma-crystallin E (Gamma-E-crystallin)
Q9CXV3	Crygf	19.63001,43.25735,51.80495,11.45105,14.93369,12.93993,17.12456,	20	707	Gamma-crystallin F (Gamma-F-crystallin)
Q8VHL5	Crygn	24.79891,17.49771,	20	94	Gamma-crystallin N (Gamma-N-crystallin)
O70250	Pgam2	17.58506,42.60487,	20	35	Phosphoglycerate mutase 2 (EC 5.4.2.11) (EC 5.4.2.4) (BPG-dependent PGAM 2) (Muscle-specific phosphoglycerate mutase) (Phosphoglycerate mutase isozyme M) (PGAM-M)
P31786	Dbi		15N only	4	Acyl-CoA-binding protein (ACBP) (Diazepam-binding inhibitor) (DBI) (Endozepine) (EP)
P47739	Aldh3a1 Ahd-4 Ahd4 Aldh3 Aldh4		15N only	2	Aldehyde dehydrogenase, dimeric NADP-preferring (EC 1.2.1.5) (Aldehyde dehydrogenase 4) (Aldehyde dehydrogenase family 3 member A1) (Dioxin-inducible aldehyde dehydrogenase 3)
Q6PIC6	Atp1a3		15N only	2	Sodium/potassium-transporting ATPase subunit alpha-3 (Na(+)/K(+) ATPase alpha-3 subunit) (EC 3.6.3.9) (Na(+)/K(+) ATPase alpha(III) subunit) (Sodium pump subunit alpha-3)
Q6PIE5	Atp1a2		15N only	2	Sodium/potassium-transporting ATPase subunit alpha-2 (Na(+)/K(+) ATPase alpha-2 subunit) (EC 3.6.3.9) (Na(+)/K(+) ATPase alpha(+) subunit) (Sodium pump subunit alpha-2)
Q8VDN2	Atp1a1		15N only	2	Sodium/potassium-transporting ATPase subunit alpha-1 (Na(+)/K(+) ATPase alpha-1 subunit) (EC 3.6.3.9) (Sodium pump subunit alpha-1)
Q9WV27	Atp1a4 Atp1al2		15N only	2	Sodium/potassium-transporting ATPase subunit alpha-4 (Na(+)/K(+) ATPase alpha-4 subunit) (EC 3.6.3.9) (Sodium pump subunit alpha-4)
Q9D4D4	Tktl2		15N only	1	Transketolase-like protein 2 (EC 2.2.1.1)
P10493	Nid1 Ent		15N only	1	Nidogen-1 (NID-1) (Entactin)
P01027	C3		15N only	1	Complement C3 (HSE-MSF) [Cleaved into: Complement C3 beta chain; C3-beta-c (C3bc); Complement C3 alpha chain; C3a anaphylatoxin; Acylation stimulating protein (ASP) (C3adesArg); Complement C3b alpha' chain; Complement C3c alpha' chain fragment 1; Complement C3dg fragment; Complement C3g fragment; Complement C3d fragment; Complement C3f fragment; Complement C3c alpha' chain fragment 2]
P47962	Rpl5		14N only	6	60S ribosomal protein L5
Q9CWJ9	Atic Purh		14N only	4	Bifunctional purine biosynthesis protein PURH [Includes: Phosphoribosylaminoimidazolecarboxamide formyltransferase (EC 2.1.2.3) (5-aminoimidazole-4-carboxamide ribonucleotide formyltransferase) (AICAR transformylase); IMP cyclohydrolase (EC 3.5.4.10) (ATIC) (IMP synthase) (Inosinicase)]
P46735	Myo1b		14N only	4	Unconventional myosin-Ib (MIH-L) (Myosin I alpha) (MMI-alpha) (MMIa)
P97351	Rps3a Rps3a1		14N only	6	40S ribosomal protein S3a (Protein TU-11)
P68037	Ube2l3 Ubce7		14N only	5	Ubiquitin-conjugating enzyme E2 L3 (EC 2.3.2.23) (E2 ubiquitin-conjugating enzyme L3) (UbcM4) (Ubiquitin carrier protein L3) (Ubiquitin-protein ligase L3)
Q9JJC6	Rilpl1 MNCb-2440		14N only	4	RILP-like protein 1 (Rab-interacting lysosomal-like protein 1)
P12382	Pfkl Pfk-l Pfkb		14N only	23	ATP-dependent 6-phosphofructokinase, liver type (ATP-PFK) (PFK-L) (EC 2.7.1.11) (6-phosphofructokinase type B) (Phosphofructo-1-kinase isozyme B) (PFK-B) (Phosphohexokinase)
Q9DBF1	Aldh7a1 Ald7a1		14N only	20	Alpha-aminoadipic semialdehyde dehydrogenase (Alpha-AASA dehydrogenase) (EC 1.2.1.31) (Aldehyde dehydrogenase family 7 member A1) (EC 1.2.1.3) (Antiquitin-1) (Betaine aldehyde dehydrogenase) (EC 1.2.1.8) (Delta1-piperideine-6-carboxylate dehydrogenase) (P6c dehydrogenase)
Q01768	Nme2		14N only	18	Nucleoside diphosphate kinase B (NDK B) (NDP kinase B) (EC 2.7.4.6) (Histidine protein kinase NDKB) (EC 2.7.13.3) (P18) (nm23-M2)
Q02248	Ctnnb1 Catnb		14N only	12	Catenin beta-1 (Beta-catenin)
P50396	Gdi1 Rabgdia		14N only	17	Rab GDP dissociation inhibitor alpha (Rab GDI alpha) (Guanosine diphosphate dissociation inhibitor 1) (GDI-1)
P68040	Rack1 Gnb2-rs1 Gnb2l1		14N only	11	Receptor of activated protein C kinase 1 (12-3) (Guanine nucleotide-binding protein subunit beta-2-like 1) (Receptor for activated C kinase) (Receptor of activated protein kinase C 1) (p205) [Cleaved into: Receptor of activated protein C kinase 1, N-terminally processed (Guanine nucleotide-binding protein subunit beta-2-like 1, N-terminally processed)]
P80315	Cct4 Cctd		14N only	8	T-complex protein 1 subunit delta (TCP-1-delta) (A45) (CCT-delta)
P70296	Pebp1 Pbp Pebp		14N only	15	Phosphatidylethanolamine-binding protein 1 (PEBP-1) (HCNPpp) [Cleaved into: Hippocampal cholinergic neurostimulating peptide (HCNP)]
Q80W21	Gstm7		14N only	11	Glutathione S-transferase Mu 7 (EC 2.5.1.18) (GST class-mu 7) (GSTM-7)
O09061	Psmb1		14N only	7	Proteasome subunit beta type-1 (EC 3.4.25.1) (Macropain subunit C5) (Multicatalytic endopeptidase complex subunit C5) (Proteasome component C5) (Proteasome gamma chain)
Q9Z2U0	Psma7		14N only	7	Proteasome subunit alpha type-7 (EC 3.4.25.1) (Proteasome subunit RC6-1)
P62827	Ran Rasl2-8		14N only	5	GTP-binding nuclear protein Ran (GTPase Ran) (Ras-like protein TC4) (Ras-related nuclear protein)
O88685	Psmc3 Tbp1		14N only	10	26S proteasome regulatory subunit 6A (26S proteasome AAA-ATPase subunit RPT5) (Proteasome 26S subunit ATPase 3) (Tat-binding protein 1) (TBP-1)
Q920E5	Fdps		14N only	9	Farnesyl pyrophosphate synthase (FPP synthase) (FPS) (EC 2.5.1.10) ((2E,6E)-farnesyl diphosphate synthase) (Cholesterol-regulated 39 kDa protein) (CR 39) (Dimethylallyltranstransferase) (EC 2.5.1.1) (Farnesyl diphosphate synthase) (Geranyltranstransferase)
P28656	Nap1l1 Nrp		14N only	8	Nucleosome assembly protein 1-like 1 (Brain protein DN38) (NAP-1-related protein)
Q9Z0N1	Eif2s3x		14N only	7	Eukaryotic translation initiation factor 2 subunit 3, X-linked (Eukaryotic translation initiation factor 2 subunit gamma, X-linked) (eIF-2-gamma X)
Q9Z0N2	Eif2s3y		14N only	7	Eukaryotic translation initiation factor 2 subunit 3, Y-linked (Eukaryotic translation initiation factor 2 subunit gamma, Y-linked) (eIF-2-gamma Y) (Spermatogonial proliferation factor) (Spy)
P80318	Cct3 Cctg		14N only	8	T-complex protein 1 subunit gamma (TCP-1-gamma) (CCT-gamma) (Matricin) (mTRiC-P5)
O88342	Wdr1		14N only	8	WD repeat-containing protein 1 (Actin-interacting protein 1) (AIP1)
Q91VI7	Rnh1 Rnh		14N only	6	Ribonuclease inhibitor (Ribonuclease/angiogenin inhibitor 1)
Q9WUB3	Pygm		14N only	8	Glycogen phosphorylase, muscle form (EC 2.4.1.1) (Myophosphorylase)
Q6ZQ38	Cand1 D10Ertd516e Kiaa0829		14N only	10	Cullin-associated NEDD8-dissociated protein 1 (Cullin-associated and neddylation-dissociated protein 1) (p120 CAND1)
O35643	Ap1b1 Adtb1		14N only	7	AP-1 complex subunit beta-1 (Adaptor protein complex AP-1 subunit beta-1) (Adaptor-related protein complex 1 subunit beta-1) (Beta-1-adaptin) (Beta-adaptin 1) (Clathrin assembly protein complex 1 beta large chain) (Golgi adaptor HA1/AP1 adaptin beta subunit)
P62889	Rpl30		14N only	9	60S ribosomal protein L30
P62962	Pfn1		14N only	7	Profilin-1 (Profilin I)
Q6ZWV3	Rpl10 Qm		14N only	10	60S ribosomal protein L10 (Protein QM homolog) (Ribosomal protein L10)
P35700	Prdx1 Msp23 Paga Tdpx2		14N only	9	Peroxiredoxin-1 (EC 1.11.1.15) (Macrophage 23 kDa stress protein) (Osteoblast-specific factor 3) (OSF-3) (Thioredoxin peroxidase 2) (Thioredoxin-dependent peroxide reductase 2)
Q9Z2U1	Psma5		14N only	8	Proteasome subunit alpha type-5 (EC 3.4.25.1) (Macropain zeta chain) (Multicatalytic endopeptidase complex zeta chain) (Proteasome zeta chain)
P14148	Rpl7		14N only	7	60S ribosomal protein L7
Q9R0P3	Esd Es10 Sid478		14N only	7	S-formylglutathione hydrolase (FGH) (EC 3.1.2.12) (Esterase 10) (Esterase D) (Sid 478)
Q9CWH6	Psma8 Psma7l		14N only	6	Proteasome subunit alpha-type 7-like (EC 3.4.25.1)
Q99JY9	Actr3 Arp3		14N only	8	Actin-related protein 3 (Actin-like protein 3)
Q99JI4	Psmd6		14N only	7	26S proteasome non-ATPase regulatory subunit 6 (26S proteasome regulatory subunit RPN7) (26S proteasome regulatory subunit S10) (p42A)
P05132	Prkaca Pkaca		14N only	6	cAMP-dependent protein kinase catalytic subunit alpha (PKA C-alpha) (EC 2.7.11.11)
Q9CPV4	Glod4		14N only	5	Glyoxalase domain-containing protein 4
Q8R016	Blmh		14N only	7	Bleomycin hydrolase (BH) (BLM hydrolase) (BMH) (EC 3.4.22.40)
P40124	Cap1 Cap		14N only	7	Adenylyl cyclase-associated protein 1 (CAP 1)
P50247	Ahcy		14N only	6	Adenosylhomocysteinase (AdoHcyase) (EC 3.3.1.1) (CUBP) (Liver copper-binding protein) (S-adenosyl-L-homocysteine hydrolase)
Q9CZD3	Gars		14N only	10	Glycine--tRNA ligase (EC 3.6.1.17) (EC 6.1.1.14) (Diadenosine tetraphosphate synthetase) (AP-4-A synthetase) (Glycyl-tRNA synthetase) (GlyRS)
O35343	Kpna4 Qip1		14N only	6	Importin subunit alpha-3 (Importin alpha Q1) (Qip1) (Karyopherin subunit alpha-4)
Q61553	Fscn1 Fan1 Snl		14N only	5	Fascin (Singed-like protein)
P57780	Actn4		14N only	7	Alpha-actinin-4 (Non-muscle alpha-actinin 4)
P42932	Cct8 Cctq		14N only	4	T-complex protein 1 subunit theta (TCP-1-theta) (CCT-theta)
Q8K1M6	Dnm1l Drp1		14N only	5	Dynamin-1-like protein (EC 3.6.5.5) (Dynamin family member proline-rich carboxyl-terminal domain less) (Dymple) (Dynamin-related protein 1)
Q99KC8	Vwa5a Loh11cr2a		14N only	5	von Willebrand factor A domain-containing protein 5A (Loss of heterozygosity 11 chromosomal region 2 gene A protein homolog)
Q9EPK7	Xpo7 Kiaa0745 Ranbp16		14N only	4	Exportin-7 (Exp7) (Ran-binding protein 16)
P63028	Tpt1 Trt		14N only	6	Translationally-controlled tumor protein (TCTP) (21 kDa polypeptide) (p21) (p23)
P61089	Ube2n Blu		14N only	5	Ubiquitin-conjugating enzyme E2 N (EC 2.3.2.23) (Bendless-like ubiquitin-conjugating enzyme) (E2 ubiquitin-conjugating enzyme N) (Ubc13) (Ubiquitin carrier protein N) (Ubiquitin-protein ligase N)
P62082	Rps7		14N only	6	40S ribosomal protein S7
P35979	Rpl12		14N only	5	60S ribosomal protein L12
P99029	Prdx5 Prdx6		14N only	5	Peroxiredoxin-5, mitochondrial (EC 1.11.1.15) (Antioxidant enzyme B166) (AOEB166) (Liver tissue 2D-page spot 2D-0014IV) (PLP) (Peroxiredoxin V) (Prx-V) (Peroxisomal antioxidant enzyme) (Thioredoxin peroxidase PMP20)
Q921M7	Fam49b		14N only	7	Protein FAM49B
Q9Z223	Mocs2		14N only	4	Molybdopterin synthase catalytic subunit (EC 2.8.1.12) (Molybdenum cofactor synthesis protein 2 large subunit) (Molybdenum cofactor synthesis protein 2B) (MOCS2B)
Q64467	Gapdhs Gapd-s Gapds		14N only	9	Glyceraldehyde-3-phosphate dehydrogenase, testis-specific (EC 1.2.1.12) (Spermatogenic cell-specific glyceraldehyde 3-phosphate dehydrogenase 2) (GAPDH-2) (Spermatogenic glyceraldehyde-3-phosphate dehydrogenase)
Q3ULJ0	Gpd1l Kiaa0089		14N only	7	Glycerol-3-phosphate dehydrogenase 1-like protein (EC 1.1.1.8)
Q9R0P5	Dstn Dsn Sid23		14N only	3	Destrin (Actin-depolymerizing factor) (ADF) (Sid 23)
P97372	Psme2 Pa28b1		14N only	4	Proteasome activator complex subunit 2 (11S regulator complex subunit beta) (REG-beta) (Activator of multicatalytic protease subunit 2) (Proteasome activator 28 subunit beta) (PA28b) (PA28beta)
O70435	Psma3		14N only	4	Proteasome subunit alpha type-3 (EC 3.4.25.1) (Macropain subunit C8) (Multicatalytic endopeptidase complex subunit C8) (Proteasome component C8) (Proteasome subunit K)
P26041	Msn		14N only	9	Moesin (Membrane-organizing extension spike protein)
P12970	Rpl7a Surf-3 Surf3		14N only	4	60S ribosomal protein L7a (Surfeit locus protein 3)
Q8VCA8	Scrn2		14N only	6	Secernin-2
P62843	Rps15 Rig		14N only	2	40S ribosomal protein S15 (RIG protein)
Q9CVB6	Arpc2		14N only	4	Actin-related protein 2/3 complex subunit 2 (Arp2/3 complex 34 kDa subunit) (p34-ARC)
P50516	Atp6v1a Atp6a1 Atp6a2 Atp6v1a1		14N only	8	V-type proton ATPase catalytic subunit A (V-ATPase subunit A) (EC 7.1.2.2) (V-ATPase 69 kDa subunit) (Vacuolar proton pump subunit alpha)
O08529	Capn2		14N only	9	Calpain-2 catalytic subunit (EC 3.4.22.53) (80 kDa M-calpain subunit) (CALP80) (Calcium-activated neutral proteinase 2) (CANP 2) (Calpain M-type) (Calpain-2 large subunit) (Millimolar-calpain) (M-calpain)
P45376	Akr1b1 Akr1b3 Aldor1 Aldr1		14N only	4	Aldose reductase (AR) (EC 1.1.1.21) (Aldehyde reductase)
P02535	Krt10 Krt1-10		14N only	7	Keratin, type I cytoskeletal 10 (56 kDa cytokeratin) (Cytokeratin-10) (CK-10) (Keratin, type I cytoskeletal 59 kDa) (Keratin-10) (K10)
P06801	Me1 Mod-1 Mod1		14N only	7	NADP-dependent malic enzyme (NADP-ME) (EC 1.1.1.40) (Malic enzyme 1)
Q9QUM9	Psma6		14N only	3	Proteasome subunit alpha type-6 (EC 3.4.25.1) (Macropain iota chain) (Multicatalytic endopeptidase complex iota chain) (Proteasome iota chain)
O08917	Flot1		14N only	5	Flotillin-1
Q99JX4	Eif3m Pcid1		14N only	4	Eukaryotic translation initiation factor 3 subunit M (eIF3m) (PCI domain-containing protein 1)
P68181	Prkacb Pkacb		14N only	4	cAMP-dependent protein kinase catalytic subunit beta (PKA C-beta) (EC 2.7.11.11)
P26638	Sars Sars1 Sers		14N only	5	Serine--tRNA ligase, cytoplasmic (EC 6.1.1.11) (Seryl-tRNA synthetase) (SerRS) (Seryl-tRNA(Ser/Sec) synthetase)
Q9D7G0	Prps1		14N only	3	Ribose-phosphate pyrophosphokinase 1 (EC 2.7.6.1) (Phosphoribosyl pyrophosphate synthase I) (PRS-I)
Q9CS42	Prps2		14N only	3	Ribose-phosphate pyrophosphokinase 2 (EC 2.7.6.1) (Phosphoribosyl pyrophosphate synthase II) (PRS-II)
Q8BP48	Metap1		14N only	3	Methionine aminopeptidase 1 (MAP 1) (MetAP 1) (EC 3.4.11.18) (Peptidase M 1)
P50580	Pa2g4 Ebp1 Plfap		14N only	3	Proliferation-associated protein 2G4 (IRES-specific cellular trans-acting factor 45 kDa) (ITAF45) (Mpp1) (Proliferation-associated protein 1) (Protein p38-2G4)
P27659	Rpl3		14N only	3	60S ribosomal protein L3 (J1 protein)
P14824	Anxa6 Anx6		14N only	5	Annexin A6 (67 kDa calelectrin) (Annexin VI) (Annexin-6) (Calphobindin-II) (CPB-II) (Chromobindin-20) (Lipocortin VI) (Protein III) (p68) (p70)
Q91WQ3	Yars		14N only	4	Tyrosine--tRNA ligase, cytoplasmic (EC 6.1.1.1) (Tyrosyl-tRNA synthetase) (TyrRS) [Cleaved into: Tyrosine--tRNA ligase, cytoplasmic, N-terminally processed]
O88543	Cops3 Csn3		14N only	3	COP9 signalosome complex subunit 3 (SGN3) (Signalosome subunit 3) (JAB1-containing signalosome subunit 3)
P18052	Ptpra Lrp Ptpa		14N only	5	Receptor-type tyrosine-protein phosphatase alpha (Protein-tyrosine phosphatase alpha) (R-PTP-alpha) (EC 3.1.3.48) (LCA-related phosphatase) (PTPTY-28)
P24547	Impdh2		14N only	3	Inosine-5'-monophosphate dehydrogenase 2 (IMP dehydrogenase 2) (IMPD 2) (IMPDH 2) (EC 1.1.1.205) (IMPDH-II)
P14685	Psmd3 P91a Tstap91a		14N only	3	26S proteasome non-ATPase regulatory subunit 3 (26S proteasome regulatory subunit RPN3) (26S proteasome regulatory subunit S3) (Proteasome subunit p58) (Transplantation antigen P91A) (Tum-P91A antigen)
Q6NXH9	Krt73 Kb36		14N only	3	Keratin, type II cytoskeletal 73 (Cytokeratin-73) (CK-73) (Keratin-73) (K73) (Type II inner root sheath-specific keratin-K6irs3) (Type-II keratin Kb36)
Q9EQQ9	Oga Hexc Kiaa0679 Mgea5		14N only	5	Protein O-GlcNAcase (OGA) (EC 3.2.1.169) (Beta-N-acetylhexosaminidase) (Beta-hexosaminidase) (Bifunctional protein NCOAT) (Meningioma-expressed antigen 5) (N-acetyl-beta-D-glucosaminidase) (N-acetyl-beta-glucosaminidase)
Q76MZ3	Ppp2r1a		14N only	3	Serine/threonine-protein phosphatase 2A 65 kDa regulatory subunit A alpha isoform (PP2A subunit A isoform PR65-alpha) (PP2A subunit A isoform R1-alpha)
P24527	Lta4h		14N only	3	Leukotriene A-4 hydrolase (LTA-4 hydrolase) (EC 3.3.2.6) (Leukotriene A(4) hydrolase)
Q9JI91	Actn2		14N only	4	Alpha-actinin-2 (Alpha-actinin skeletal muscle isoform 2) (F-actin cross-linking protein)
P23116	Eif3a Csma Eif3 Eif3s10		14N only	6	Eukaryotic translation initiation factor 3 subunit A (eIF3a) (Centrosomin) (Eukaryotic translation initiation factor 3 subunit 10) (eIF-3-theta) (eIF3 p167) (eIF3 p180) (eIF3 p185) (p162)
Q02257	Jup		14N only	3	Junction plakoglobin (Desmoplakin III) (Desmoplakin-3)
Q6ZPJ3	Ube2o Kiaa1734		14N only	5	(E3-independent) E2 ubiquitin-conjugating enzyme UBE2O (EC 2.3.2.24) (E2/E3 hybrid ubiquitin-protein ligase UBE2O) (Ubiquitin carrier protein O) (Ubiquitin-conjugating enzyme E2 O) (Ubiquitin-conjugating enzyme E2 of 230 kDa) (Ubiquitin-conjugating enzyme E2-230K) (Ubiquitin-protein ligase O)
Q9ER72	Cars		14N only	3	Cysteine--tRNA ligase, cytoplasmic (EC 6.1.1.16) (Cysteinyl-tRNA synthetase) (CysRS)
Q8BYA0	Tbcd		14N only	4	Tubulin-specific chaperone D (Beta-tubulin cofactor D) (Tubulin-folding cofactor D)
Q11011	Npepps Psa		14N only	3	Puromycin-sensitive aminopeptidase (PSA) (EC 3.4.11.14) (Cytosol alanyl aminopeptidase) (AAP-S)
Q61768	Kif5b Khcs Kns1		14N only	3	Kinesin-1 heavy chain (Conventional kinesin heavy chain) (Ubiquitous kinesin heavy chain) (UKHC)
Q91W89	Man2c1		14N only	3	Alpha-mannosidase 2C1 (EC 3.2.1.24) (Alpha-D-mannoside mannohydrolase) (Mannosidase alpha class 2C member 1) (Neutral/cytosolic alpha-mannosidase)
Q8VI75	Ipo4 Imp4a Ranbp4		14N only	3	Importin-4 (Imp4) (Importin-4a) (Imp4a) (Ran-binding protein 4) (RanBP4)
Q05D44	Eif5b If2		14N only	3	Eukaryotic translation initiation factor 5B (eIF-5B) (EC 3.6.5.3) (Translation initiation factor IF-2)
P56399	Usp5 Isot		14N only	2	Ubiquitin carboxyl-terminal hydrolase 5 (EC 3.4.19.12) (Deubiquitinating enzyme 5) (Isopeptidase T) (Ubiquitin thioesterase 5) (Ubiquitin-specific-processing protease 5)
Q9DBG3	Ap2b1 Clapb1		14N only	2	AP-2 complex subunit beta (AP105B) (Adaptor protein complex AP-2 subunit beta) (Adaptor-related protein complex 2 subunit beta) (Beta-2-adaptin) (Beta-adaptin) (Clathrin assembly protein complex 2 beta large chain) (Plasma membrane adaptor HA2/AP2 adaptin beta subunit)
Q8CGC7	Eprs Qprs		14N only	2	Bifunctional glutamate/proline--tRNA ligase (Bifunctional aminoacyl-tRNA synthetase) [Includes: Glutamate--tRNA ligase (EC 6.1.1.17) (Glutamyl-tRNA synthetase) (GluRS); Proline--tRNA ligase (EC 6.1.1.15) (Prolyl-tRNA synthetase) (ProRS)]
P67984	Rpl22		14N only	4	60S ribosomal protein L22 (Heparin-binding protein HBp15)
P62858	Rps28		14N only	2	40S ribosomal protein S28
P86048	Rpl10l		14N only	6	60S ribosomal protein L10-like
P62301	Rps13		14N only	4	40S ribosomal protein S13
P63325	Rps10		14N only	4	40S ribosomal protein S10
Q9R1P3	Psmb2		14N only	4	Proteasome subunit beta type-2 (EC 3.4.25.1) (Macropain subunit C7-I) (Multicatalytic endopeptidase complex subunit C7-I) (Proteasome component C7-I)
Q9CR57	Rpl14		14N only	4	60S ribosomal protein L14
P62717	Rpl18a		14N only	3	60S ribosomal protein L18a
P62774	Mtpn Gcdp		14N only	2	Myotrophin (Granule cell differentiation protein) (Protein V-1)
P62900	Rpl31		14N only	2	60S ribosomal protein L31
Q9D892	Itpa		14N only	3	Inosine triphosphate pyrophosphatase (ITPase) (Inosine triphosphatase) (EC 3.6.1.9) (Non-canonical purine NTP pyrophosphatase) (Non-standard purine NTP pyrophosphatase) (Nucleoside-triphosphate diphosphatase) (Nucleoside-triphosphate pyrophosphatase) (NTPase)
P62849	Rps24		14N only	2	40S ribosomal protein S24
Q8BK64	Ahsa1		14N only	5	Activator of 90 kDa heat shock protein ATPase homolog 1 (AHA1)
Q60817	Naca		14N only	3	Nascent polypeptide-associated complex subunit alpha (Alpha-NAC) (Alpha-NAC/1.9.2)
P02088	Hbb-b1		14N only	4	Hemoglobin subunit beta-1 (Beta-1-globin) (Hemoglobin beta-1 chain) (Hemoglobin beta-major chain)
Q9CR86	Carhsp1		14N only	2	Calcium-regulated heat stable protein 1 (Calcium-regulated heat-stable protein of 24 kDa) (CRHSP-24)
Q91VH6	Memo1		14N only	4	Protein MEMO1 (Mediator of ErbB2-driven cell motility 1) (Memo-1)
Q61206	Pafah1b2 Pafahb		14N only	3	Platelet-activating factor acetylhydrolase IB subunit beta (EC 3.1.1.47) (PAF acetylhydrolase 30 kDa subunit) (PAF-AH 30 kDa subunit) (PAF-AH subunit beta) (PAFAH subunit beta)
P62751	Rpl23a		14N only	2	60S ribosomal protein L23a
Q6ZWX6	Eif2s1 Eif2a		14N only	4	Eukaryotic translation initiation factor 2 subunit 1 (Eukaryotic translation initiation factor 2 subunit alpha) (eIF-2-alpha) (eIF-2A) (eIF-2alpha)
Q91WK2	Eif3h Eif3s3		14N only	4	Eukaryotic translation initiation factor 3 subunit H (eIF3h) (Eukaryotic translation initiation factor 3 subunit 3) (eIF-3-gamma) (eIF3 p40 subunit)
Q9CXW4	Rpl11		14N only	2	60S ribosomal protein L11
Q99K85	Psat1 Psa Psat		14N only	4	Phosphoserine aminotransferase (PSAT) (EC 2.6.1.52) (Endometrial progesterone-induced protein) (EPIP) (Phosphohydroxythreonine aminotransferase)
P35980	Rpl18		14N only	2	60S ribosomal protein L18
Q9D7X8	Ggct		14N only	2	Gamma-glutamylcyclotransferase (EC 4.3.2.9)
P51410	Rpl9		14N only	2	60S ribosomal protein L9
Q9R0N0	Galk1 Galk Glk		14N only	4	Galactokinase (EC 2.7.1.6) (Galactose kinase)
Q8JZM2	Prr15l Atad4		14N only	1	Proline-rich protein 15-like protein (Protein ATAD4)
P62821	Rab1A Rab1		14N only	2	Ras-related protein Rab-1A (YPT1-related protein)
O35593	Psmd14 Pad1		14N only	3	26S proteasome non-ATPase regulatory subunit 14 (EC 3.4.19.-) (26S proteasome regulatory subunit RPN11) (MAD1)
P62492	Rab11a Rab11		14N only	2	Ras-related protein Rab-11A (Rab-11)
P46638	Rab11b		14N only	2	Ras-related protein Rab-11B
P09671	Sod2 Sod-2		14N only	2	Superoxide dismutase [Mn], mitochondrial (EC 1.15.1.1)
Q9CQM9	Glrx3 Picot Txnl2		14N only	3	Glutaredoxin-3 (PKC-interacting cousin of thioredoxin) (PICOT) (PKC-theta-interacting protein) (PKCq-interacting protein) (Thioredoxin-like protein 2)
O70251	Eef1b Eef1b2		14N only	2	Elongation factor 1-beta (EF-1-beta)
A2AQ07	Tubb1		14N only	4	Tubulin beta-1 chain
Q91XV3	Basp1 Nap22		14N only	2	Brain acid soluble protein 1 (22 kDa neuronal tissue-enriched acidic protein) (Neuronal axonal membrane protein NAP-22)
P51807	Dynlt1 Tctel1 Tctex-1 Tctex1		14N only	1	Dynein light chain Tctex-type 1 (Activator of G-protein signaling 2) (AGS2) (T-complex testis-specific protein 1) (TCTEX-1)
Q61205	Pafah1b3 Pafahg		14N only	2	Platelet-activating factor acetylhydrolase IB subunit gamma (EC 3.1.1.47) (PAF acetylhydrolase 29 kDa subunit) (PAF-AH 29 kDa subunit) (PAF-AH subunit gamma) (PAFAH subunit gamma)
Q9D8S4	Rexo2 Smfn		14N only	2	Oligoribonuclease, mitochondrial (EC 3.1.-.-) (RNA exonuclease 2 homolog) (Small fragment nuclease)
P62754	Rps6		14N only	2	40S ribosomal protein S6 (Phosphoprotein NP33)
P97371	Psme1		14N only	2	Proteasome activator complex subunit 1 (11S regulator complex subunit alpha) (REG-alpha) (Activator of multicatalytic protease subunit 1) (Proteasome activator 28 subunit alpha) (PA28a) (PA28alpha)
P00920	Ca2 Car2		14N only	2	Carbonic anhydrase 2 (EC 4.2.1.1) (Carbonate dehydratase II) (Carbonic anhydrase II) (CA-II)
O88456	Capns1 Capn4		14N only	2	Calpain small subunit 1 (CSS1) (Calcium-activated neutral proteinase small subunit) (CANP small subunit) (Calcium-dependent protease small subunit) (CDPS) (Calcium-dependent protease small subunit 1) (Calpain regulatory subunit)
Q9CZ30	Ola1 Gtpbp9		14N only	7	Obg-like ATPase 1 (GTP-binding protein 9)
Q9CQ65	Mtap		14N only	2	S-methyl-5'-thioadenosine phosphorylase (EC 2.4.2.28) (5'-methylthioadenosine phosphorylase) (MTA phosphorylase) (MTAP) (MTAPase)
P62267	Rps23		14N only	1	40S ribosomal protein S23
Q9D819	Ppa1 Pp Pyp		14N only	2	Inorganic pyrophosphatase (EC 3.6.1.1) (Pyrophosphate phospho-hydrolase) (PPase)
P97346	Nxn Gn25		14N only	3	Nucleoredoxin (EC 1.8.1.8) (Protein Red-1)
P14131	Rps16		14N only	1	40S ribosomal protein S16
P62838	Ube2d2 Ubc4 Ubch4 Ubch5b Ube2d2a		14N only	1	Ubiquitin-conjugating enzyme E2 D2 (EC 2.3.2.23) ((E3-independent) E2 ubiquitin-conjugating enzyme D2) (EC 2.3.2.24) (E2 ubiquitin-conjugating enzyme D2) (Ubiquitin carrier protein D2) (Ubiquitin-conjugating enzyme E2(17)KB 2) (Ubiquitin-conjugating enzyme E2-17 kDa 2) (Ubiquitin-protein ligase D2)
P61079	Ube2d3		14N only	1	Ubiquitin-conjugating enzyme E2 D3 (EC 2.3.2.23) ((E3-independent) E2 ubiquitin-conjugating enzyme D3) (EC 2.3.2.24) (E2 ubiquitin-conjugating enzyme D3) (Ubiquitin carrier protein D3) (Ubiquitin-conjugating enzyme E2(17)KB 3) (Ubiquitin-conjugating enzyme E2-17 kDa 3) (Ubiquitin-protein ligase D3)
Q8BP67	Rpl24		14N only	1	60S ribosomal protein L24
P42669	Pura		14N only	2	Transcriptional activator protein Pur-alpha (Purine-rich single-stranded DNA-binding protein alpha)
O88545	Cops6 Csn6		14N only	2	COP9 signalosome complex subunit 6 (SGN6) (Signalosome subunit 6) (JAB1-containing signalosome subunit 6)
P62141	Ppp1cb		14N only	2	Serine/threonine-protein phosphatase PP1-beta catalytic subunit (PP-1B) (EC 3.1.3.16) (EC 3.1.3.53)
Q91Z53	Grhpr Glxr		14N only	2	Glyoxylate reductase/hydroxypyruvate reductase (EC 1.1.1.79) (EC 1.1.1.81)
P62137	Ppp1ca Ppp1a		14N only	2	Serine/threonine-protein phosphatase PP1-alpha catalytic subunit (PP-1A) (EC 3.1.3.16)
P45591	Cfl2		14N only	1	Cofilin-2 (Cofilin, muscle isoform)
Q7TNG5	Eml2		14N only	4	Echinoderm microtubule-associated protein-like 2 (EMAP-2)
P63087	Ppp1cc		14N only	2	Serine/threonine-protein phosphatase PP1-gamma catalytic subunit (PP-1G) (EC 3.1.3.16) (Protein phosphatase 1C catalytic subunit)
P62880	Gnb2		14N only	2	Guanine nucleotide-binding protein G(I)/G(S)/G(T) subunit beta-2 (G protein subunit beta-2) (Transducin beta chain 2)
Q06138	Cab39 Mo25		14N only	2	Calcium-binding protein 39 (MO25alpha) (Protein Mo25)
Q9D0J4	Arl2		14N only	1	ADP-ribosylation factor-like protein 2
Q9DBC7	Prkar1a		14N only	2	cAMP-dependent protein kinase type I-alpha regulatory subunit [Cleaved into: cAMP-dependent protein kinase type I-alpha regulatory subunit, N-terminally processed]
Q9CQW1	Ykt6		14N only	1	Synaptobrevin homolog YKT6 (EC 2.3.1.-)
P11352	Gpx1		14N only	1	Glutathione peroxidase 1 (GPx-1) (GSHPx-1) (EC 1.11.1.9) (Cellular glutathione peroxidase) (Selenium-dependent glutathione peroxidase 1)
O88844	Idh1		14N only	2	Isocitrate dehydrogenase [NADP] cytoplasmic (IDH) (EC 1.1.1.42) (Cytosolic NADP-isocitrate dehydrogenase) (IDP) (NADP(+)-specific ICDH) (Oxalosuccinate decarboxylase)
P62242	Rps8		14N only	1	40S ribosomal protein S8
Q64448	Gja3		14N only	2	Gap junction alpha-3 protein (Connexin-46) (Cx46)
Q641P0	Actr3b		14N only	2	Actin-related protein 3B (ARP3-beta) (Actin-like protein 3B)
Q9R0Y5	Ak1		14N only	1	Adenylate kinase isoenzyme 1 (AK 1) (EC 2.7.4.3) (EC 2.7.4.6) (ATP-AMP transphosphorylase 1) (ATP:AMP phosphotransferase) (Adenylate monophosphate kinase) (Myokinase)
Q91V41	Rab14		14N only	1	Ras-related protein Rab-14
P24369	Ppib		14N only	1	Peptidyl-prolyl cis-trans isomerase B (PPIase B) (EC 5.2.1.8) (CYP-S1) (Cyclophilin B) (Rotamase B) (S-cyclophilin) (SCYLP)
Q61820	Rasl2-9		14N only	1	GTP-binding nuclear protein Ran, testis-specific isoform
P00493	Hprt1 Hprt		14N only	1	Hypoxanthine-guanine phosphoribosyltransferase (HGPRT) (HGPRTase) (EC 2.4.2.8) (HPRT B)
Q9D142	Nudt14		14N only	1	Uridine diphosphate glucose pyrophosphatase (UDPG pyrophosphatase) (UGPPase) (EC 3.6.1.45) (Nucleoside diphosphate-linked moiety X motif 14) (Nudix motif 14)
Q62348	Tsn		14N only	1	Translin (EC 3.1.-.-) (Component 3 of promoter of RISC) (C3PO) (Testis/brain RNA-binding protein) (TB-RBP)
Q9D1A2	Cndp2 Cn2		14N only	2	Cytosolic non-specific dipeptidase (EC 3.4.13.18) (CNDP dipeptidase 2) (Glutamate carboxypeptidase-like protein 1)
Q99KX1	Mlf2		14N only	1	Myeloid leukemia factor 2 (Myelodysplasia-myeloid leukemia factor 2)
Q9DB29	Iah1		14N only	1	Isoamyl acetate-hydrolyzing esterase 1 homolog (EC 3.1.-.-)
Q99KK9	Hars2 Harsl		14N only	2	Probable histidine--tRNA ligase, mitochondrial (EC 6.1.1.21) (Histidine--tRNA ligase-like) (Histidyl-tRNA synthetase) (HisRS)
O70325	Gpx4		14N only	1	Phospholipid hydroperoxide glutathione peroxidase (PHGPx) (EC 1.11.1.12) (Glutathione peroxidase 4) (GPx-4) (GSHPx-4)
Q61035	Hars		14N only	2	Histidine--tRNA ligase, cytoplasmic (EC 6.1.1.21) (Histidyl-tRNA synthetase) (HisRS)
Q9R0H5	Krt71 K6irs1 Kb34 Krt2-6g Krt6g		14N only	2	Keratin, type II cytoskeletal 71 (Cytokeratin-6G) (CK-6G) (Cytokeratin-71) (CK-71) (Keratin-6G) (K6G) (Keratin-71) (K71) (Type II inner root sheath-specific keratin-K6irs1) (mK6irs) (mK6irs1/Krt2-6g) (Type-II keratin Kb34)
Q9WVK4	Ehd1 Past1		14N only	2	EH domain-containing protein 1 (PAST homolog 1) (mPAST1)
Q9QXY6	Ehd3 Ehd2		14N only	2	EH domain-containing protein 3
O70194	Eif3d Eif3s7		14N only	2	Eukaryotic translation initiation factor 3 subunit D (eIF3d) (Eukaryotic translation initiation factor 3 subunit 7) (eIF-3-zeta) (eIF3 p66)
P48758	Cbr1 Cbr		14N only	1	Carbonyl reductase [NADPH] 1 (EC 1.1.1.184) (15-hydroxyprostaglandin dehydrogenase [NADP(+)]) (EC 1.1.1.197) (NADPH-dependent carbonyl reductase 1) (Prostaglandin 9-ketoreductase) (Prostaglandin-E(2) 9-reductase) (EC 1.1.1.189)
Q9Z1W9	Stk39 Spak		14N only	2	STE20/SPS1-related proline-alanine-rich protein kinase (Ste-20-related kinase) (EC 2.7.11.1) (Serine/threonine-protein kinase 39)
Q6IFZ6	Krt77 Krt1b		14N only	2	Keratin, type II cytoskeletal 1b (Cytokeratin-1B) (CK-1B) (Embryonic type II keratin-1) (Keratin-77) (K77) (Type-II keratin Kb39)
Q791V5	Mtch2		14N only	1	Mitochondrial carrier homolog 2
O89079	Cope Cope1		14N only	1	Coatomer subunit epsilon (Epsilon-coat protein) (Epsilon-COP)
P04104	Krt1 Krt2-1		14N only	2	Keratin, type II cytoskeletal 1 (67 kDa cytokeratin) (Cytokeratin-1) (CK-1) (Keratin-1) (K1) (Type-II keratin Kb1)
Q8R010	Aimp2 Jtv1		14N only	1	Aminoacyl tRNA synthase complex-interacting multifunctional protein 2 (Multisynthase complex auxiliary component p38) (Protein JTV-1)
Q9JII6	Akr1a1 Akr1a4		14N only	1	Alcohol dehydrogenase [NADP(+)] (EC 1.1.1.2) (Aldehyde reductase) (Aldo-keto reductase family 1 member A1)
Q8R001	Mapre2		14N only	1	Microtubule-associated protein RP/EB family member 2 (APC-binding protein EB2) (End-binding protein 2) (EB2)
P10518	Alad Lv		14N only	1	Delta-aminolevulinic acid dehydratase (ALADH) (EC 4.2.1.24) (Porphobilinogen synthase)
P47199	Cryz		14N only	1	Quinone oxidoreductase (EC 1.6.5.5) (NADPH:quinone reductase) (Zeta-crystallin)
Q9R062	Gyg1 Gyg		14N only	1	Glycogenin-1 (GN-1) (GN1) (EC 2.4.1.186)
Q9DCZ1	Gmpr Gmpr1		14N only	1	GMP reductase 1 (GMPR 1) (EC 1.7.1.7) (Guanosine 5'-monophosphate oxidoreductase 1) (Guanosine monophosphate reductase 1)
Q64527	Wnt8a Stra11 Wnt8d		14N only	1	Protein Wnt-8a (Protein Wnt-8d) (Stimulated by retinoic acid gene 11 protein)
Q9QY48	Dnase2b Dlad		14N only	1	Deoxyribonuclease-2-beta (EC 3.1.22.1) (DNase II-like acid DNase) (DNase2-like acid DNase) (Deoxyribonuclease II beta) (DNase II beta) (Endonuclease DLAD)
P63085	Mapk1 Erk2 Mapk Prkm1		14N only	1	Mitogen-activated protein kinase 1 (MAP kinase 1) (MAPK 1) (EC 2.7.11.24) (ERT1) (Extracellular signal-regulated kinase 2) (ERK-2) (MAP kinase isoform p42) (p42-MAPK) (Mitogen-activated protein kinase 2) (MAP kinase 2) (MAPK 2)
P21279	Gnaq		14N only	1	Guanine nucleotide-binding protein G(q) subunit alpha (Guanine nucleotide-binding protein alpha-q)
Q3UM45	Ppp1r7 Sds22		14N only	1	Protein phosphatase 1 regulatory subunit 7 (Protein phosphatase 1 regulatory subunit 22)
P22907	Hmbs Uros1		14N only	1	Porphobilinogen deaminase (PBG-D) (EC 2.5.1.61) (Hydroxymethylbilane synthase) (HMBS) (Pre-uroporphyrinogen synthase)
Q9CQT1	Mri1		14N only	1	Methylthioribose-1-phosphate isomerase (M1Pi) (MTR-1-P isomerase) (EC 5.3.1.23) (S-methyl-5-thioribose-1-phosphate isomerase) (Translation initiation factor eIF-2B subunit alpha/beta/delta-like protein)
Q91VR5	Ddx1		14N only	2	ATP-dependent RNA helicase DDX1 (EC 3.6.4.13) (DEAD box protein 1)
Q9QZQ8	H2afy		14N only	1	Core histone macro-H2A.1 (Histone macroH2A1) (mH2A1) (H2A.y) (H2A/y)
Q9EQ80	Nif3l1		14N only	1	NIF3-like protein 1
Q9JLV5	Cul3		14N only	2	Cullin-3 (CUL-3)
Q9D0M1	Prpsap1		14N only	1	Phosphoribosyl pyrophosphate synthase-associated protein 1 (PRPP synthase-associated protein 1) (39 kDa phosphoribosypyrophosphate synthase-associated protein) (PAP39)
Q5SSF7	Tent5c Fam46c		14N only	1	Terminal nucleotidyltransferase 5C (EC 2.7.7.19)
Q9WUA3	Pfkp Pfkc		14N only	2	ATP-dependent 6-phosphofructokinase, platelet type (ATP-PFK) (PFK-P) (EC 2.7.1.11) (6-phosphofructokinase type C) (Phosphofructo-1-kinase isozyme C) (PFK-C) (Phosphohexokinase)
P08113	Hsp90b1 Grp94 Tra-1 Tra1		14N only	2	Endoplasmin (94 kDa glucose-regulated protein) (GRP-94) (Endoplasmic reticulum resident protein 99) (ERp99) (Heat shock protein 90 kDa beta member 1) (Polymorphic tumor rejection antigen 1) (Tumor rejection antigen gp96)
Q8JZQ9	Eif3b Eif3s9		14N only	2	Eukaryotic translation initiation factor 3 subunit B (eIF3b) (Eukaryotic translation initiation factor 3 subunit 9) (eIF-3-eta) (eIF3 p116)
P48722	Hspa4l Apg1 Hsp4l Osp94		14N only	2	Heat shock 70 kDa protein 4L (Heat shock 70-related protein APG-1) (Osmotic stress protein 94)
Q9D8E6	Rpl4		14N only	1	60S ribosomal protein L4
Q8CI94	Pygb		14N only	2	Glycogen phosphorylase, brain form (EC 2.4.1.1)
P03995	Gfap		14N only	1	Glial fibrillary acidic protein (GFAP)
Q8BWY3	Etf1		14N only	1	Eukaryotic peptide chain release factor subunit 1 (Eukaryotic release factor 1) (eRF1)
Q7TPR4	Actn1		14N only	2	Alpha-actinin-1 (Alpha-actinin cytoskeletal isoform) (F-actin cross-linking protein) (Non-muscle alpha-actinin-1)
Q6ZWR4	Ppp2r2b		14N only	1	Serine/threonine-protein phosphatase 2A 55 kDa regulatory subunit B beta isoform (PP2A subunit B isoform B55-beta) (PP2A subunit B isoform PR55-beta) (PP2A subunit B isoform R2-beta) (PP2A subunit B isoform beta)
Q6P1F6	Ppp2r2a		14N only	1	Serine/threonine-protein phosphatase 2A 55 kDa regulatory subunit B alpha isoform (PP2A subunit B isoform B55-alpha) (PP2A subunit B isoform PR55-alpha) (PP2A subunit B isoform R2-alpha) (PP2A subunit B isoform alpha)
Q925E7	Ppp2r2d D7Ertd753e Kiaa1541		14N only	1	Serine/threonine-protein phosphatase 2A 55 kDa regulatory subunit B delta isoform (PP2A subunit B isoform B55-delta) (PP2A subunit B isoform PR55-delta) (PP2A subunit B isoform R2-delta) (PP2A subunit B isoform delta)
Q9DCV7	Krt7 Krt2-7		14N only	1	Keratin, type II cytoskeletal 7 (Cytokeratin-7) (CK-7) (Keratin-7) (K7) (Type-II keratin Kb7)
Q9Z2W0	Dnpep		14N only	1	Aspartyl aminopeptidase (EC 3.4.11.21)
Q91VY9	Znf622 D15Ertd806e Zfp622		14N only	1	Zinc finger protein 622
Q8BH44	Coro2b		14N only	1	Coronin-2B
Q9ERK4	Cse1l Xpo2		14N only	2	Exportin-2 (Exp2) (Chromosome segregation 1-like protein) (Importin-alpha re-exporter)
Q922B2	Dars		14N only	1	Aspartate--tRNA ligase, cytoplasmic (EC 6.1.1.12) (Aspartyl-tRNA synthetase) (AspRS)
Q9Z2T6	Krt85 Krt2-18 Krthb5		14N only	1	Keratin, type II cuticular Hb5 (Keratin-85) (K85) (Type II hair keratin Hb5) (Type-II keratin Kb25)
Q91ZJ5	Ugp2		14N only	1	UTP--glucose-1-phosphate uridylyltransferase (EC 2.7.7.9) (UDP-glucose pyrophosphorylase) (UDPGP) (UGPase)
Q61753	Phgdh		14N only	1	D-3-phosphoglycerate dehydrogenase (3-PGDH) (EC 1.1.1.95) (A10)
P14733	Lmnb1		14N only	1	Lamin-B1
Q8BMJ2	Lars		14N only	2	Leucine--tRNA ligase, cytoplasmic (EC 6.1.1.4) (Leucyl-tRNA synthetase) (LeuRS)
Q61292	Lamb2 Lams		14N only	3	Laminin subunit beta-2 (Laminin-11 subunit beta) (Laminin-14 subunit beta) (Laminin-15 subunit beta) (Laminin-3 subunit beta) (Laminin-4 subunit beta) (Laminin-7 subunit beta) (Laminin-9 subunit beta) (S-laminin subunit beta) (S-LAM beta)
Q7TNP2	Ppp2r1b		14N only	1	Serine/threonine-protein phosphatase 2A 65 kDa regulatory subunit A beta isoform (PP2A subunit A isoform PR65-beta) (PP2A subunit A isoform R1-beta)
Q7M761	Ovch2 Ovtn		14N only	1	Ovochymase-2 (EC 3.4.21.-) (Oviductin)
Q6V595	Klhl6		14N only	1	Kelch-like protein 6
Q3UDE2	Ttll12		14N only	1	Tubulin--tyrosine ligase-like protein 12
Q9D0I9	Rars		14N only	1	Arginine--tRNA ligase, cytoplasmic (EC 6.1.1.19) (Arginyl-tRNA synthetase) (ArgRS)
Q9Z0U0	Xpr1 Syg1		14N only	1	Xenotropic and polytropic retrovirus receptor 1 (Protein SYG1 homolog) (Rmc-1)
Q8CHT1	Ngef		14N only	1	Ephexin-1 (Eph-interacting exchange protein) (Neuronal guanine nucleotide exchange factor)
Q80X44	Zbtb24 Bif1 Bsg1 Znf450		14N only	1	Zinc finger and BTB domain-containing protein 24 (Bone morphogenetic protein-induced factor 1) (Brain-specific protein 1) (Zinc finger protein 450)
Q8BZW8	Nhlrc2		14N only	1	NHL repeat-containing protein 2
P70670	Naca Gm1878		14N only	3	Nascent polypeptide-associated complex subunit alpha, muscle-specific form (Alpha-NAC, muscle-specific form) (skNAC)
Q8R146	Apeh		14N only	1	Acylamino-acid-releasing enzyme (AARE) (EC 3.4.19.1) (Acyl-peptide hydrolase) (APH) (Acylaminoacyl-peptidase)
Q80TM9	Nisch Kiaa0975		14N only	2	Nischarin (Imidazoline receptor 1) (I-1) (IR1) (Imidazoline receptor I-1-like protein) (Imidazoline-1 receptor) (I1R)
P48193	Epb41 Epb4.1 Kiaa4056		14N only	1	Protein 4.1 (P4.1) (4.1R) (Band 4.1)
Q9QXK3	Copg2		14N only	1	Coatomer subunit gamma-2 (Gamma-2-coat protein) (Gamma-2-COP)
A2CE44	Zxdb		14N only	1	Zinc finger X-linked protein ZXDB
Q9WU78	Pdcd6ip Aip1 Alix		14N only	1	Programmed cell death 6-interacting protein (ALG-2-interacting protein 1) (ALG-2-interacting protein X) (E2F1-inducible protein) (Eig2)
Q99PV8	Bcl11b Ctip2 Rit1		14N only	1	B-cell lymphoma/leukemia 11B (BCL-11B) (B-cell CLL/lymphoma 11B) (COUP-TF-interacting protein 2) (Radiation-induced tumor suppressor gene 1 protein) (mRit1)
Q5QNQ6	Osbp2		14N only	1	Oxysterol-binding protein 2
Q6P2B1	Tnpo3		14N only	1	Transportin-3
Q9JIF7	Copb1 Copb		14N only	1	Coatomer subunit beta (Beta-coat protein) (Beta-COP)
Q3TXS7	Psmd1		14N only	1	26S proteasome non-ATPase regulatory subunit 1 (26S proteasome regulatory subunit RPN2) (26S proteasome regulatory subunit S1)
Q9Z1Z0	Uso1 Vdp		14N only	1	General vesicular transport factor p115 (Protein USO1 homolog) (Transcytosis-associated protein) (TAP) (Vesicle-docking protein)
Q8BGQ7	Aars		14N only	1	Alanine--tRNA ligase, cytoplasmic (EC 6.1.1.7) (Alanyl-tRNA synthetase) (AlaRS) (Protein sticky) (Sti)
Q6NXZ1	Krba1 Kiaa1862 MNCb-1826		14N only	1	Protein KRBA1
Q3UGY8	Arfgef3 Big3 D10Bwg1379e Kiaa1244		14N only	2	Brefeldin A-inhibited guanine nucleotide-exchange protein 3 (ARFGEF family member 3)
Q99NF8	Ranbp17		14N only	1	Ran-binding protein 17
P08032	Spta1 Spna1 Spta		14N only	2	Spectrin alpha chain, erythrocytic 1 (Erythroid alpha-spectrin)
O70546	Kdm6a Utx		14N only	1	Lysine-specific demethylase 6A (EC 1.14.11.-) (Histone demethylase UTX) (Ubiquitously transcribed TPR protein on the X chromosome) (Ubiquitously transcribed X chromosome tetratricopeptide repeat protein)
Q5ND34	Wdr81		14N only	1	WD repeat-containing protein 81
Q8VDD5	Myh9		14N only	1	Myosin-9 (Cellular myosin heavy chain, type A) (Myosin heavy chain 9) (Myosin heavy chain, non-muscle IIa) (Non-muscle myosin heavy chain A) (NMMHC-A) (Non-muscle myosin heavy chain IIa) (NMMHC II-a) (NMMHC-IIA)
Q61879	Myh10		14N only	1	Myosin-10 (Cellular myosin heavy chain, type B) (Myosin heavy chain 10) (Myosin heavy chain, non-muscle IIb) (Non-muscle myosin heavy chain B) (NMMHC-B) (Non-muscle myosin heavy chain IIb) (NMMHC II-b) (NMMHC-IIB)
Q60675	Lama2		14N only	1	Laminin subunit alpha-2 (Laminin M chain) (Laminin-12 subunit alpha) (Laminin-2 subunit alpha) (Laminin-4 subunit alpha) (Merosin heavy chain)

## Sheet: Lens-Cortex
Table S2. A complete list of lens-cortex proteins identified by mass spectrometry
Uniprot Entry	Gene symbol	Peptide ratio(s) (14N/15N)	Composite ratio (14N/15N)	Spectra count	Protein names
Q9WVJ5	Crybb1	1.67553,5.46466,2.01861,2.48457,3.9856,3.81436,3.59478,6.92216,3.59278,14.7778,15.53214,9.243,3.27047,6.39646,2.45809,1.51017,6.46896,1.16576,2.23752,1.67411,1.176,1.56318,1.25048,176.02363,580.33719,108.16625,100.0,1380.7614,6.51274,6.34389,30.36923,6.7983,	4.6669	680	Beta-crystallin B1 OS=Mus musculus GN=Crybb1 PE=1 SV=3
Q9JJV1	Cryba2	2.43431,1.88311,2.27249,3.39322,1.10436,6.34871,2.96103,4.0822,1.60691,1.31814,1.82832,3.49461,1.36763,5.11662,2.02823,1.60798,131.95627,87.23128,264.34687,	2.43431	186	Beta-crystallin A2 OS=Mus musculus GN=Cryba2 PE=2 SV=3
Q9JJV0	Cryba4	7.83809,4.39508,4.57571,12.58643,3.64211,3.59108,2.00454,2.03134,4.04504,4.08993,100.0,7.13573,	4.23976	706	Beta-crystallin A4 OS=Mus musculus GN=Cryba4 PE=2 SV=3
P62696	Crybb2	0.27608,0.38565,0.63261,0.70375,0.99303,0.47788,1.09649,1.11254,1.14175,2.44142,1.02547,1.73524,1.01208,	1.01208	318	Beta-crystallin B2 OS=Mus musculus GN=Crybb2 PE=1 SV=2
P04344	Crygb	3.01077,1.61073,3.21411,2.70706,3.78078,3.99092,3.24382,3.36632,2.1462,1.84938,6.48673,1.89686,1.96161,5.63854,4.51481,84.98148,32.5033,0.03003,46.12124,10.56036,6.21652,	3.36632	403	Gamma-crystallin B OS=Mus musculus GN=Crygb PE=2 SV=4
Q05816	Fabp5	2.1075,1.63859,2.88115,1.74072,8.96135,3.48487,5.53327,2.43151,3.35664,6.76671,15.40232,8.27256,10.51866,5.92976,48.47778,4.06932,4.45557,	4.45557	105	Fatty acid-binding protein, epidermal OS=Mus musculus GN=Fabp5 PE=1 SV=3
P24622	Cryaa	1.01055,1.95529,1.91153,3.29281,2.45443,1.86041,1.22829,1.72422,3.32168,0.31504,1.91516,9.23066,15.22857,1.60237,2.4483,8.32396,1.67898,	1.91516	1118	Alpha-crystallin A chain OS=Mus musculus GN=Cryaa PE=2 SV=1
P02525	Cryba1	3.1252,2.43634,3.78014,2.74508,1.99839,5.76282,2.77295,3.77389,7.80945,2.71466,0.97863,3.96643,4.72632,5.30039,1.07251,3.20945,4.01954,4.55197,11.17593,	3.77389	647	Beta-crystallin A1 OS=Mus musculus GN=Cryba1 PE=2 SV=2
Q9R0P9	Uchl1	3.29236,1.82308,21.24529,100.0,6.03728,	6.03728	43	Ubiquitin carboxyl-terminal hydrolase isozyme L1 OS=Mus musculus GN=Uchl1 PE=1 SV=1
P99024	Tubb5	0.59607,1.25935,1.05198,1.21171,1.68176,0.9303,0.8841,3.02943,1.1037,1.21546,1.153,	1.153	90	Tubulin beta-5 chain OS=Mus musculus GN=Tubb5 PE=1 SV=1
P23927	Cryab	1.63738,2.31887,1.28351,1.42912,1.39128,1.3464,3.64895,2.5013,1.26742,	1.42912	870	Alpha-crystallin B chain OS=Mus musculus GN=Cryab PE=1 SV=2
Q9CXV3	Crygf	63.65717,17.28307,4.29849,23.08653,63.8816,39.80242,100.0,42.06527,19.61749,6.65407,12.00099,12.03645,86.0524,17.42342,71.29418,42.21555,18.02613,30.43267,	26.5063	279	Gamma-crystallin F OS=Mus musculus GN=Crygf PE=2 SV=3
Q9JJU9	Crybb3	8.99236,3.38252,19.8552,9.59556,12.77162,3.60359,27.68414,16.75309,16.36276,7.71841,8.81397,6.15312,7.42911,37.66511,16.95852,6.20934,4.6506,5.12745,	8.90272	301	Beta-crystallin B3 OS=Mus musculus GN=Crybb3 PE=2 SV=3
Q61597	Crygc	3.01077,1.61073,3.21411,2.70706,3.78078,3.99092,3.24382,3.36632,2.1462,1.84938,4.76462,4.9827,1.6723,4.51481,84.98148,32.5033,4.79339,8.69515,37.42762,184.79932,	3.88443	445	Gamma-crystallin C OS=Mus musculus GN=Crygc PE=1 SV=3
P68372	Tubb4b	1.26225,1.25935,1.05198,1.21171,1.68176,0.9303,0.8841,3.02943,1.1037,1.21546,1.153,	1.21171	81	Tubulin beta-4B chain OS=Mus musculus GN=Tubb4b PE=1 SV=1
P16858	Gapdh	2.48251,3.41913,1.71471,1.87823,1.34213,3.17263,2.74894,2.04505,2.30571,1.79938,0.68162,1.00857,0.97459,	1.87823	119	Glyceraldehyde-3-phosphate dehydrogenase OS=Mus musculus GN=Gapdh PE=1 SV=2
P17742	Ppia	1.13795,0.81519,0.51799,0.44645,0.69265,0.76139,0.77382,0.67668,0.65439,	0.69265	25	Peptidyl-prolyl cis-trans isomerase A OS=Mus musculus GN=Ppia PE=1 SV=2
O35486	Crygs	2.79502,3.07428,1.97184,1.75584,1.85959,2.90421,0.6767,3.21245,2.05311,4.81339,1.73611,2.80039,2.75756,1.25396,1.40491,2.20538,23.20021,13.59876,6.47895,10.61592,0.08156,	2.75756	303	Beta-crystallin S OS=Mus musculus GN=Crygs PE=1 SV=3
P05063	Aldoc	1.64381,1.79394,2.98124,1.46737,1.19145,1.13172,1.45356,1.96368,1.89447,1.96368,	1.71724	54	Fructose-bisphosphate aldolase C OS=Mus musculus GN=Aldoc PE=1 SV=4
P04342	Crygd	4.04247,3.26258,4.31406,1.95965,1.9198,5.4184,4.50134,3.64741,2.68646,8.54154,39.80242,6.39416,5.14117,4.82013,12.24015,4.0607,19.61749,6.65407,5.6409,16.13072,5.35191,5.35191,	5.24548	343	Gamma-crystallin D OS=Mus musculus GN=Crygd PE=2 SV=3
Q6NVD9	Bfsp2	1.15304,1.26126,1.1767,0.88273,0.28497,0.18094,0.61178,0.39522,1.14273,0.64589,0.39709,0.16688,0.02266,100.0,14.12483,4.3201,8.99948,	0.88273	114	Phakinin OS=Mus musculus GN=Bfsp2 PE=1 SV=1
P52480	Pkm	1.51363,3.71165,4.39267,2.1556,4.4082,1.63184,0.89535,2.48186,2.45887,6.94298,7.16472,5.51886,1.5042,5.10362,4.62331,4.66414,10.06772,7.68627,14.57375,4.22999,	4.40042	122	Pyruvate kinase PKM OS=Mus musculus GN=Pkm PE=1 SV=4
P14602	Hspb1	0.53454,0.56556,0.29251,0.28292,0.60834,0.39716,0.81274,0.79922,0.55324,	0.55324	69	Heat shock protein beta-1 OS=Mus musculus GN=Hspb1 PE=1 SV=3
P68369	Tuba1a	1.31753,2.20833,3.41729,4.70159,1.14607,1.28123,0.70516,1.43167,1.279,1.92849,0.55341,3.18519,0.99753,3.18519,1.89902,0.132,11.43487,100.0,4.63933,4.07824,	1.9137	121	Tubulin alpha-1A chain OS=Mus musculus GN=Tuba1a PE=1 SV=1
P05213	Tuba1b	1.31753,2.20833,0.98706,1.14607,1.28123,0.70516,1.92849,0.55341,3.18519,0.99753,3.18519,1.89902,0.132,11.43487,100.0,4.63933,4.07824,	1.89902	113	Tubulin alpha-1B chain OS=Mus musculus GN=Tuba1b PE=1 SV=2
Q99LX0	Park7	0.7878,1.35892,1.53993,2.059,	1.4466	24	Protein DJ-1 OS=Mus musculus GN=Park7 PE=1 SV=1
Q8CIX8	Lgsn	0.65838,0.65838,0.35121,1.25539,0.51597,0.70521,0.50297,0.62353,0.53018,0.26353,0.67794,0.15924,0.47725,0.0,0.00463,0.05363,0.0,0.03836,0.08283,0.05919,	0.40941	77	Lengsin OS=Mus musculus GN=Lgsn PE=1 SV=1
P17182	Eno1	4.54425,4.63736,3.48737,0.90529,11.40696,6.19983,3.5493,3.91141,3.05647,4.32211,22.74983,4.70948,19.16128,5.87505,100.0,16.84395,14.91804,	4.70948	109	Alpha-enolase OS=Mus musculus GN=Eno1 PE=1 SV=3
P09411	Pgk1	3.08848,3.08848,5.08668,4.9704,10.25035,4.04682,2.7204,5.73022,100.0,5.25106,5.25106,0.11745,5.56686,5.35852,	5.16822	61	Phosphoglycerate kinase 1 OS=Mus musculus GN=Pgk1 PE=1 SV=4
P04345	Cryga	3.01077,1.61073,86.1786,60.54824,42.14084,39.24366,172.63802,4.51481,58.99283,77.4686,32.5033,155.44786,17.27888,31.24552,184.79932,	42.1408	138	Gamma-crystallin A OS=Mus musculus GN=Cryga PE=2 SV=2
Q61598	Gdi2	1.79282,3.50414,2.41021,9.16235,3.99597,4.71378,16.6545,3.83088,7.74961,4.71206,6.1772,26.35136,100.0,	4.71378	65	Rab GDP dissociation inhibitor beta OS=Mus musculus GN=Gdi2 PE=1 SV=1
Q9DCJ9	Npl	6.14049,100.0,4.75367,5.62273,5.98914,	5.98914	29	N-acetylneuraminate lyase OS=Mus musculus GN=Npl PE=1 SV=1
P20152	Vim	0.03944,0.04984,0.03255,0.05889,0.05065,0.05427,0.05366,0.03787,0.0472,0.0472,0.03369,0.03242,0.04726,0.05637,0.0381,0.02666,0.01517,0.01143,0.00111,0.02773,0.01808,0.0279,0.07364,0.06237,0.0,0.01982,0.0,0.00327,0.04471,0.0367,0.00364,0.0,0.02823,0.02503,0.00455,0.0,0.04821,0.04084,0.00738,0.0,	0.03249	70	Vimentin OS=Mus musculus GN=Vim PE=1 SV=3
P68373	Tuba1c	1.31753,2.20833,0.98706,1.14607,1.28123,0.70516,1.43167,1.279,1.92849,0.55341,3.18519,0.99753,3.18519,1.89902,0.132,11.43487,100.0,4.63933,4.07824,	1.43167	114	Tubulin alpha-1C chain OS=Mus musculus GN=Tuba1c PE=1 SV=1
Q9CWF2	Tubb2b	0.59607,1.25935,1.05198,1.21171,1.68176,0.9303,0.8841,3.02943,1.21546,1.153,	1.18199	64	Tubulin beta-2B chain OS=Mus musculus GN=Tubb2b PE=1 SV=1
Q7TMM9	Tubb2a	0.59607,1.05198,1.21171,1.68176,0.9303,0.8841,3.02943,1.21546,1.153,	1.153	67	Tubulin beta-2A chain OS=Mus musculus GN=Tubb2a PE=1 SV=1
P06151	Ldha	2.5407,2.91522,3.63848,2.59591,14.76529,7.84888,9.81979,39.54546,	5.34396	27	L-lactate dehydrogenase A chain OS=Mus musculus GN=Ldha PE=1 SV=3
P63260,P60710	Actb Actg1	1.47313,1.52412,1.66959,0.31754,0.81313,0.98389,1.33477,1.2801,1.42461,2.5501,2.13282,1.3288,	1.37896	194	Actin, cytoplasmic 2 OS=Mus musculus GN=Actg1 PE=1 SV=1 @Actin, cytoplasmic 1 OS=Mus musculus GN=Actb PE=1 SV=1
P40142	Tkt	0.95504,0.71487,1.27432,1.65962,0.81266,0.72836,0.64463,1.88184,1.53654,0.67282,0.71605,1.23077,0.96213,0.94067,4.35648,4.89735,16.77685,	0.96213	79	Transketolase OS=Mus musculus GN=Tkt PE=1 SV=1
P10107	Anxa1	0.49458,0.55312,0.6603,0.66275,0.64109,0.44799,0.44799,0.91167,	0.59548	42	Annexin A1 OS=Mus musculus GN=Anxa1 PE=1 SV=2
Q8VHL5	Crygn	15.11486,8.32442,11.58783,10.98016,10.1866,9.40096,143.46068,18.12386,12.63585,33.5931,11.35576,13.13691,13.13691,	12.6358	40	Gamma-crystallin N OS=Mus musculus GN=Crygn PE=1 SV=2
P68040	Gnb2l1	3.55352,19.0751,100.0,8.55202,	12.7723	25	Guanine nucleotide-binding protein subunit beta-2-like 1 OS=Mus musculus GN=Gnb2l1 PE=1 SV=3
P62962	Pfn1	4.16105,	4.16105	19	Profilin-1 OS=Mus musculus GN=Pfn1 PE=1 SV=2
P16460	Ass1	7.14525,2.97824,4.22245,2.21958,1.05812,4.50888,4.65134,5.14462,6.88256,4.0404,4.0404,	4.22245	77	Argininosuccinate synthase OS=Mus musculus GN=Ass1 PE=1 SV=1
P10126	Eef1a1	4.11597,1.90093,1.90093,1.19775,1.20672,1.07812,3.16043,1.20459,1.88256,1.65015,1.5376,	1.65015	81	Elongation factor 1-alpha 1 OS=Mus musculus GN=Eef1a1 PE=1 SV=3
P19157	Gstp1	7.427,4.6713,6.44676,6.14003,7.16509,5.02083,6.68098,26.41016,	6.56282	34	Glutathione S-transferase P 1 OS=Mus musculus GN=Gstp1 PE=1 SV=2
Q8BKC5	Ipo5	4.92437,49.16638,7.03881,14.15465,4.09455,4.09455,5.20966,4.3922,3.3736,3.3736,100.0,9.90436,7.37867,9.34557,41.84507,4.42446,5.72124,8.55619,18.80315,5.83638,100.0,7.59024,5.91899,4.90265,100.0,27.31294,100.0,	7.37867	104	Importin-5 OS=Mus musculus GN=Ipo5 PE=1 SV=3
P16546	Sptan1	0.67257,0.67257,1.08227,1.08227,1.51641,1.4023,0.68184,0.8229,2.02039,0.81991,0.52406,1.36559,1.09211,1.10573,0.34273,1.03413,1.59323,1.31899,0.27284,1.05173,0.82798,0.67521,0.53958,0.67521,0.50822,0.73192,1.32439,0.44438,1.11259,0.33381,0.9728,0.84043,0.59376,0.58996,0.57725,0.42081,1.00999,0.91689,1.04428,1.04428,1.3407,0.75745,0.75745,0.09377,139.54916,0.11192,0.02703,0.08922,	0.82141	236	Spectrin alpha chain, non-erythrocytic 1 OS=Mus musculus GN=Sptan1 PE=1 SV=4
Q9D1U0	Grifin	2.0332,1.59256,0.80919,	1.59256	13	Grifin OS=Mus musculus GN=Grifin PE=2 SV=1
P62827	Ran	3.78303,	3.78303	12	GTP-binding nuclear protein Ran OS=Mus musculus GN=Ran PE=1 SV=3
Q9DCL9	Paics	1.14795,1.34287,1.09009,1.11703,	1.13238	38	Multifunctional protein ADE2 OS=Mus musculus GN=Paics PE=1 SV=4
A2AMT1	Bfsp1	0.78018,1.14446,1.03603,1.05469,0.87378,0.51791,0.62999,0.06886,1.25166,0.8658,1.83463,0.47684,0.16213,0.15167,0.79026,0.19733,0.14191,0.20216,0.43629,0.55746,6.86543,0.00806,0.1867,	0.55746	125	Filensin OS=Mus musculus GN=Bfsp1 PE=2 SV=1
P10649	Gstm1	3.76721,1.51217,2.1017,5.19543,5.50827,8.32284,74.02639,	5.19543	23	Glutathione S-transferase Mu 1 OS=Mus musculus GN=Gstm1 PE=1 SV=2
Q01853	Vcp	2.46297,2.82987,2.96826,2.17655,2.14966,2.19281,1.80997,1.02111,1.05986,4.66541,6.63213,100.0,100.0,	2.46297	66	Transitional endoplasmic reticulum ATPase OS=Mus musculus GN=Vcp PE=1 SV=4
P24549	Aldh1a1	1.77852,1.79686,2.482,3.0669,3.32526,5.20055,0.77268,1.16561,0.84596,4.16324,4.32663,10.55134,4.0474,0.07532,13.8943,0.01041,	2.759	64	Retinal dehydrogenase 1 OS=Mus musculus GN=Aldh1a1 PE=1 SV=5
P60843	Eif4a1	0.79478,0.97951,4.79971,1.23636,8.89132,6.66414,7.06077,5.94732,5.82107,13.42807,5.68181,	5.82107	39	Eukaryotic initiation factor 4A-I OS=Mus musculus GN=Eif4a1 PE=1 SV=1
P70168	Kpnb1	1.2627,2.16564,1.93507,2.19785,0.99273,1.85734,1.47337,1.08612,1.49169,5.78669,	1.6645	56	Importin subunit beta-1 OS=Mus musculus GN=Kpnb1 PE=1 SV=2
P05064	Aldoa	1.89624,1.92781,3.56341,8.26512,4.19241,30.58283,	3.86514	33	Fructose-bisphosphate aldolase A OS=Mus musculus GN=Aldoa PE=1 SV=2
P63028	Tpt1	2.99563,2.99563,	2.99563	8	Translationally-controlled tumor protein OS=Mus musculus GN=Tpt1 PE=1 SV=1
P51410	Rpl9	1.3751,	1.3751	6	60S ribosomal protein L9 OS=Mus musculus GN=Rpl9 PE=1 SV=2
P58252	Eef2	3.27627,3.32285,6.39501,4.95806,3.39892,4.4397,100.0,15.99648,6.00789,10.78873,6.60027,100.0,6.66391,11.72363,10.55688,4.58119,7.96841,8.18499,100.0,4.06096,6.64072,	6.64072	88	Elongation factor 2 OS=Mus musculus GN=Eef2 PE=1 SV=2
Q9QUI0	Rhoa	9.37992,	9.37992	9	Transforming protein RhoA OS=Mus musculus GN=Rhoa PE=1 SV=1
Q78ZA7	Nap1l4	1.88997,1.88997,1.24419,	1.88997	27	Nucleosome assembly protein 1-like 4 OS=Mus musculus GN=Nap1l4 PE=1 SV=1
P13020	Gsn	2.78442,2.45338,2.78442,2.74015,1.18197,4.81078,12.14789,5.41188,5.20231,	2.78442	75	Gelsolin OS=Mus musculus GN=Gsn PE=1 SV=3
P35700	Prdx1	1.56817,9.91434,1.31531,0.98175,1.45579,1.3465,1.53421,	1.45579	15	Peroxiredoxin-1 OS=Mus musculus GN=Prdx1 PE=1 SV=1
P80316	Cct5	1.90306,9.41026,	4.23182	30	T-complex protein 1 subunit epsilon OS=Mus musculus GN=Cct5 PE=1 SV=1
Q9DBJ1	Pgam1	2.7548,5.1335,	3.76055	15	Phosphoglycerate mutase 1 OS=Mus musculus GN=Pgam1 PE=1 SV=3
O09061	Psmb1	2.1822,3.18138,3.18138,1.29467,	2.63484	15	Proteasome subunit beta type-1 OS=Mus musculus GN=Psmb1 PE=1 SV=1
P51855	Gss	3.17977,4.92457,3.32741,5.0218,2.86044,4.0522,18.2442,10.4389,	4.46714	32	Glutathione synthetase OS=Mus musculus GN=Gss PE=2 SV=1
Q9D8N0	Eef1g	7.59352,	7.59352	27	Elongation factor 1-gamma OS=Mus musculus GN=Eef1g PE=1 SV=3
P80314	Cct2	3.34338,	3.34338	22	T-complex protein 1 subunit beta OS=Mus musculus GN=Cct2 PE=1 SV=4
P10518	Alad	0.42326,0.28778,0.36664,	0.36664	14	Delta-aminolevulinic acid dehydratase OS=Mus musculus GN=Alad PE=1 SV=1
O08709	Prdx6	0.32289,0.46159,	0.38606	13	Peroxiredoxin-6 OS=Mus musculus GN=Prdx6 PE=1 SV=3
Q62433	Ndrg1	0.25688,0.48864,	0.35429	14	Protein NDRG1 OS=Mus musculus GN=Ndrg1 PE=1 SV=1
Q9D0M5	Dynll2	4.60989,4.60989,9.53197,	4.60989	9	Dynein light chain 2, cytoplasmic OS=Mus musculus GN=Dynll2 PE=1 SV=1
P62259	Ywhae	1.12928,1.95042,1.95444,2.12149,	1.95243	22	14-3-3 protein epsilon OS=Mus musculus GN=Ywhae PE=1 SV=1
P61982	Ywhag	1.51575,1.51575,1.45918,1.68766,1.70482,	1.51575	19	14-3-3 protein gamma OS=Mus musculus GN=Ywhag PE=1 SV=2
Q04447	Ckb	21.69448,	21.6945	18	Creatine kinase B-type OS=Mus musculus GN=Ckb PE=1 SV=1
P63017	Hspa8	1.08159,1.11616,1.77666,1.42439,1.57713,1.63692,1.67351,2.1731,2.13755,2.1731,0.9292,0.96501,0.9292,0.96501,2.22096,2.28828,1.389,1.389,	1.49881	58	Heat shock cognate 71 kDa protein OS=Mus musculus GN=Hspa8 PE=1 SV=1
P84084	Arf5	5.11497,	5.11497	10	ADP-ribosylation factor 5 OS=Mus musculus GN=Arf5 PE=1 SV=2
Q921M7	Fam49b	3.51262,0.92351,	1.8011	13	Protein FAM49B OS=Mus musculus GN=Fam49b PE=2 SV=1
Q61171	Prdx2	2.36243,	2.36243	14	Peroxiredoxin-2 OS=Mus musculus GN=Prdx2 PE=1 SV=3
P48774	Gstm5	4.02202,	4.02202	12	Glutathione S-transferase Mu 5 OS=Mus musculus GN=Gstm5 PE=1 SV=1
P07356	Anxa2	1.22503,	1.22503	19	Annexin A2 OS=Mus musculus GN=Anxa2 PE=1 SV=2
Q62261	Sptbn1	0.37957,1.82756,0.87276,0.87276,0.85204,0.85204,0.77441,0.77441,0.98496,0.8968,0.54942,0.54942,0.97584,3.5799,0.24992,0.2196,1.01917,0.91519,0.4442,0.626,0.45921,0.12919,0.11141,0.37932,	0.77441	129	Spectrin beta chain, non-erythrocytic 1 OS=Mus musculus GN=Sptbn1 PE=1 SV=2
Q9ERD7	Tubb3	0.59607,0.9303,0.8841,2.15908,1.153,	0.9303	43	Tubulin beta-3 chain OS=Mus musculus GN=Tubb3 PE=1 SV=1
P62806	Hist1h4a	0.75834,0.76374,0.71345,0.76374,	0.76104	8	Histone H4 OS=Mus musculus GN=Hist1h4a PE=1 SV=2
Q05793	Hspg2	3.20425,4.50739,4.50739,7.81408,7.81408,3.56449,3.21728,3.03062,3.4705,3.37619,4.66619,4.26076,4.49333,3.58633,5.66849,3.94936,3.94936,2.50518,3.60609,4.65248,4.64071,4.4847,0.91344,1.19225,1.75316,1.54999,1.0076,0.97144,0.6808,1.51348,0.72006,0.94371,0.89075,0.42081,1.33691,0.88562,0.56207,0.90059,0.27119,0.65661,0.3993,0.51283,0.44217,0.28419,0.46872,0.46227,0.12268,14.0972,5.49663,100.0,20.210…	3.37619	232	Basement membrane-specific heparan sulfate proteoglycan core protein OS=Mus musculus GN=Hspg2 PE=1 SV=1
P51180	Mip	0.66823,	0.66823	15	Lens fiber major intrinsic protein OS=Mus musculus GN=Mip PE=1 SV=2
O35639	Anxa3	5.97815,1.60753,	3.10001	13	Annexin A3 OS=Mus musculus GN=Anxa3 PE=1 SV=4
P63101	Ywhaz	2.92009,2.95992,0.9664,3.21704,2.98944,3.26067,6.46499,157.4675,8.38807,	3.21704	23	14-3-3 protein zeta/delta OS=Mus musculus GN=Ywhaz PE=1 SV=1
P99026	Psmb4	4.57733,	4.57733	9	Proteasome subunit beta type-4 OS=Mus musculus GN=Psmb4 PE=1 SV=1
P68510	Ywhah	2.9429,	2.9429	15	14-3-3 protein eta OS=Mus musculus GN=Ywhah PE=1 SV=2
P06745	Gpi	8.1939,2.61845,6.91862,14.57749,4.04819,5.84725,5.84725,60.9544,20.42256,	6.91862	22	Glucose-6-phosphate isomerase OS=Mus musculus GN=Gpi PE=1 SV=4
P68254	Ywhaq	1.78928,2.11894,2.50554,2.54417,1.41005,	2.11894	11	14-3-3 protein theta OS=Mus musculus GN=Ywhaq PE=1 SV=1
P11983	Tcp1	5.44037,2.86933,5.44037,	5.44037	25	T-complex protein 1 subunit alpha OS=Mus musculus GN=Tcp1 PE=1 SV=3
Q922F4	Tubb6	1.25935,0.9303,0.8841,	0.9303	33	Tubulin beta-6 chain OS=Mus musculus GN=Tubb6 PE=1 SV=1
P14206	Rpsa	2.96129,2.96129,1.85189,2.26408,	2.58932	13	40S ribosomal protein SA OS=Mus musculus GN=Rpsa PE=1 SV=4
P11499	Hsp90ab1	1.16066,1.31833,1.8341,3.62713,3.0017,2.25029,	2.03156	60	Heat shock protein HSP 90-beta OS=Mus musculus GN=Hsp90ab1 PE=1 SV=3
Q99PT1	Arhgdia	2.3293,	2.3293	7	Rho GDP-dissociation inhibitor 1 OS=Mus musculus GN=Arhgdia PE=1 SV=3
P17751	Tpi1	5.22253,	5.22253	12	Triosephosphate isomerase OS=Mus musculus GN=Tpi1 PE=1 SV=4
O70250	Pgam2	13.39005,24.40943,19.55801,100.0,6.53087,	19.558	12	Phosphoglycerate mutase 2 OS=Mus musculus GN=Pgam2 PE=1 SV=3
Q01768	Nme2	3.56697,	3.56697	18	Nucleoside diphosphate kinase B OS=Mus musculus GN=Nme2 PE=1 SV=1
Q9ET01	Pygl	0.98296,1.15617,0.60155,0.87231,0.97382,	0.97382	37	Glycogen phosphorylase, liver form OS=Mus musculus GN=Pygl PE=1 SV=4
Q68FD5	Cltc	1.0474,4.0035,2.72318,1.41193,12.79669,6.33765,0.9259,	2.72318	63	Clathrin heavy chain 1 OS=Mus musculus GN=Cltc PE=1 SV=3
P80313	Cct7	2.24599,1.97619,2.85885,1.3319,1.23117,1.45515,	1.69578	19	T-complex protein 1 subunit eta OS=Mus musculus GN=Cct7 PE=1 SV=1
Q9D0J4	Arl2	0.05179,	0.05179	3	ADP-ribosylation factor-like protein 2 OS=Mus musculus GN=Arl2 PE=1 SV=1
Q9DBF1	Aldh7a1	100.0,0.00896,0.00205,	0.00896	12	Alpha-aminoadipic semialdehyde dehydrogenase OS=Mus musculus GN=Aldh7a1 PE=1 SV=4
P70195	Psmb7	1.57864,	1.57864	5	Proteasome subunit beta type-7 OS=Mus musculus GN=Psmb7 PE=1 SV=1
Q9D0F9	Pgm1	2.42836,2.30877,1.82393,2.49251,	2.36781	17	Phosphoglucomutase-1 OS=Mus musculus GN=Pgm1 PE=1 SV=4
P21550	Eno3	4.54425,3.5493,3.91141,3.05647,4.32211,11.16577,22.74983,	4.32211	33	Beta-enolase OS=Mus musculus GN=Eno3 PE=1 SV=3
O55234	Psmb5	6.01853,4.58483,7.07634,32.15942,	6.52604	7	Proteasome subunit beta type-5 OS=Mus musculus GN=Psmb5 PE=1 SV=3
Q9WUB3	Pygm	2.77388,100.0,12.64691,11.29075,4.5446,9.11194,22.77661,7.42229,14.59394,25.75985,5.36827,23.29364,	11.9496	37	Glycogen phosphorylase, muscle form OS=Mus musculus GN=Pygm PE=1 SV=3
Q99JR5	Tinagl1	0.00266,0.00249,0.07602,	0.00266	13	Tubulointerstitial nephritis antigen-like OS=Mus musculus GN=Tinagl1 PE=1 SV=1
Q9Z0S1	Bpnt1	7.36518,4.21042,5.80996,5.22594,11.05862,	5.80996	13	3'(2'),5'-bisphosphate nucleotidase 1 OS=Mus musculus GN=Bpnt1 PE=1 SV=2
P15532	Nme1	3.56697,	3.56697	5	Nucleoside diphosphate kinase A OS=Mus musculus GN=Nme1 PE=1 SV=1
P70349	Hint1	3.07964,	3.07964	2	Histidine triad nucleotide-binding protein 1 OS=Mus musculus GN=Hint1 PE=1 SV=3
Q9R1P0	Psma4	2.50953,2.50953,	2.50953	7	Proteasome subunit alpha type-4 OS=Mus musculus GN=Psma4 PE=1 SV=1
Q9DCD0	Pgd	2.84402,10.50236,4.98054,12.66014,0.09823,	4.98054	18	6-phosphogluconate dehydrogenase, decarboxylating OS=Mus musculus GN=Pgd PE=1 SV=3
Q99JY9	Actr3	1.9946,1.42999,	1.68886	9	Actin-related protein 3 OS=Mus musculus GN=Actr3 PE=1 SV=3
P28656	Nap1l1	1.88997,1.88997,	1.88997	16	Nucleosome assembly protein 1-like 1 OS=Mus musculus GN=Nap1l1 PE=1 SV=2
Q60692	Psmb6	4.1295,	4.1295	3	Proteasome subunit beta type-6 OS=Mus musculus GN=Psmb6 PE=1 SV=3
P07901	Hsp90aa1	1.41812,1.23001,2.11534,1.8341,1.86892,1.59231,1.59231,	1.59231	31	Heat shock protein HSP 90-alpha OS=Mus musculus GN=Hsp90aa1 PE=1 SV=4
Q9CPU0	Glo1	1.65151,	1.65151	11	Lactoylglutathione lyase OS=Mus musculus GN=Glo1 PE=1 SV=3
O35945	Aldh1a7	1.79686,2.482,4.16324,4.32663,10.55134,4.0474,11.95805,0.01041,	4.10491	23	Aldehyde dehydrogenase, cytosolic 1 OS=Mus musculus GN=Aldh1a7 PE=2 SV=1
Q9JIW9,P63321	Rala Ralb	3.20248,	3.20248	9	Ras-related protein Ral-B OS=Mus musculus GN=Ralb PE=2 SV=1 @Ras-related protein Ral-A OS=Mus musculus GN=Rala PE=1 SV=1
P10630	Eif4a2	0.97951,1.59532,1.59532,4.79971,1.23636,	1.59532	21	Eukaryotic initiation factor 4A-II OS=Mus musculus GN=Eif4a2 PE=2 SV=2
Q02053	Uba1	0.28679,3.47848,2.07515,1.96772,4.18091,4.7567,3.27012,4.63797,	3.37269	53	Ubiquitin-like modifier-activating enzyme 1 OS=Mus musculus GN=Uba1 PE=1 SV=1
Q6R0H7,P63094	Gnas Gnas	0.33961,0.5642,0.37509,0.46738,	0.4187	9	Guanine nucleotide-binding protein G(s) subunit alpha isoforms XLas OS=Mus musculus GN=Gnas PE=2 SV=1 @Guanine nucleotide-binding protein G(s) subunit alpha isoforms short OS=Mus musculus GN=Gnas PE=1 SV=1
P80315	Cct4	2.99097,14.98752,6.93434,36.0709,5.08384,	6.93434	15	T-complex protein 1 subunit delta OS=Mus musculus GN=Cct4 PE=1 SV=3
P80318	Cct3	2.62574,2.62574,	2.62574	13	T-complex protein 1 subunit gamma OS=Mus musculus GN=Cct3 PE=1 SV=1
Q61301	Ctnna2	0.58308,0.43565,0.2418,0.2418,0.69454,	0.43565	35	Catenin alpha-2 OS=Mus musculus GN=Ctnna2 PE=1 SV=3
P62082	Rps7	1.66874,1.07196,	1.33747	7	40S ribosomal protein S7 OS=Mus musculus GN=Rps7 PE=2 SV=1
P68433	Hist1h3a	2.30928,	2.30928	7	Histone H3.1 OS=Mus musculus GN=Hist1h3a PE=1 SV=2
P84228	Hist1h3b	3.69574,3.84414,	3.76921	3	Histone H3.2 OS=Mus musculus GN=Hist1h3b PE=1 SV=2
P84244,P02301	H3f3c H3f3a	0.58935,0.62262,	0.60576	2	Histone H3.3 OS=Mus musculus GN=H3f3a PE=1 SV=2 @Histone H3.3C OS=Mus musculus GN=H3f3c PE=3 SV=3
Q8VCA8	Scrn2	100.0,10.43274,10.30514,	10.4327	7	Secernin-2 OS=Mus musculus GN=Scrn2 PE=2 SV=1
P14869	Rplp0	1.79955,1.8442,2.01213,	1.8442	13	60S acidic ribosomal protein P0 OS=Mus musculus GN=Rplp0 PE=1 SV=3
P80317	Cct6a	2.57634,2.0477,3.72455,	2.57634	19	T-complex protein 1 subunit zeta OS=Mus musculus GN=Cct6a PE=1 SV=3
P10493	Nid1	0.22478,0.0187,0.0,0.0,0.01123,0.08745,0.00592,0.00662,0.0,	0.01	29	Nidogen-1 OS=Mus musculus GN=Nid1 PE=1 SV=2
Q02248	Ctnnb1	0.51393,1.15263,0.48453,	0.51393	21	Catenin beta-1 OS=Mus musculus GN=Ctnnb1 PE=1 SV=1
Q6ZWX6	Eif2s1	1.25431,	1.25431	8	Eukaryotic translation initiation factor 2 subunit 1 OS=Mus musculus GN=Eif2s1 PE=1 SV=3
Q7TQI3	Otub1	8.64768,3.2065,4.35625,6.93251,5.0647,	5.0647	10	Ubiquitin thioesterase OTUB1 OS=Mus musculus GN=Otub1 PE=1 SV=2
P68134,P68033	Actc1 Acta1	1.47313,0.81313,1.2801,1.42461,	1.35042	63	Actin, alpha skeletal muscle OS=Mus musculus GN=Acta1 PE=1 SV=1 @Actin, alpha cardiac muscle 1 OS=Mus musculus GN=Actc1 PE=1 SV=1
P15508	Sptb	0.60678,1.32024,0.41945,2.35804,0.4366,	0.60678	56	Spectrin beta chain, erythrocytic OS=Mus musculus GN=Sptb PE=1 SV=4
Q9R0P3	Esd	1.59558,	1.59558	11	S-formylglutathione hydrolase OS=Mus musculus GN=Esd PE=1 SV=1
P62889	Rpl30	4.77982,	4.77982	4	60S ribosomal protein L30 OS=Mus musculus GN=Rpl30 PE=2 SV=2
Q61581	Igfbp7	0.0,0.00536,0.03281,	0.01	4	Insulin-like growth factor-binding protein 7 OS=Mus musculus GN=Igfbp7 PE=2 SV=3
Q9CQ60	Pgls	13.81237,5.60154,	8.79605	7	6-phosphogluconolactonase OS=Mus musculus GN=Pgls PE=2 SV=1
O88342	Wdr1	14.77446,4.04411,100.0,4.56237,	8.21015	8	WD repeat-containing protein 1 OS=Mus musculus GN=Wdr1 PE=1 SV=3
P02468	Lamc1	5.09627,2.53727,2.53727,2.24801,2.42071,2.25982,1.96928,36.89403,5.53302,5.53302,23.11332,	2.53727	48	Laminin subunit gamma-1 OS=Mus musculus GN=Lamc1 PE=1 SV=2
Q6ZWV3	Rpl10	4.37645,	4.37645	9	60S ribosomal protein L10 OS=Mus musculus GN=Rpl10 PE=1 SV=3
P26040	Ezr	1.72017,	1.72017	24	Ezrin OS=Mus musculus GN=Ezr PE=1 SV=3
Q9D8E6	Rpl4	2.22941,	2.22941	12	60S ribosomal protein L4 OS=Mus musculus GN=Rpl4 PE=1 SV=3
Q9CQV8	Ywhab	1.68982,	1.68982	5	14-3-3 protein beta/alpha OS=Mus musculus GN=Ywhab PE=1 SV=3
O35344	Kpna3	1.85853,1.07267,	1.41194	4	Importin subunit alpha-4 OS=Mus musculus GN=Kpna3 PE=1 SV=1
Q9CPY7	Lap3	1.70669,	1.70669	8	Cytosol aminopeptidase OS=Mus musculus GN=Lap3 PE=1 SV=3
O08529	Capn2	1.34314,	1.34314	21	Calpain-2 catalytic subunit OS=Mus musculus GN=Capn2 PE=2 SV=4
P57780	Actn4	0.67688,0.67688,	0.67688	17	Alpha-actinin-4 OS=Mus musculus GN=Actn4 PE=1 SV=1
P47739	Aldh3a1	0.01021,0.0,8.1E-4,	0.01	11	Aldehyde dehydrogenase, dimeric NADP-preferring OS=Mus musculus GN=Aldh3a1 PE=2 SV=2
Q6PHN9	Rab35	2.3245,	2.3245	4	Ras-related protein Rab-35 OS=Mus musculus GN=Rab35 PE=1 SV=1
Q9CQI6	Cotl1	2.36186,	2.36186	6	Coactosin-like protein OS=Mus musculus GN=Cotl1 PE=1 SV=3
P47962	Rpl5	4.20256,4.20256,8.66144,15.97284,	6.03326	11	60S ribosomal protein L5 OS=Mus musculus GN=Rpl5 PE=1 SV=3
Q76MZ3	Ppp2r1a	1.11712,	1.11712	10	Serine/threonine-protein phosphatase 2A 65 kDa regulatory subunit A alpha isoform OS=Mus musculus GN=Ppp2r1a PE=1 SV=3
P02469	Lamb1	8.33372,5.66066,90.29215,0.13864,19.56458,6.56616,31.14722,4.00045,9.49616,4.1131,100.0,16.11899,	8.89597	42	Laminin subunit beta-1 OS=Mus musculus GN=Lamb1 PE=1 SV=3
P49722	Psma2	2.78941,	2.78941	6	Proteasome subunit alpha type-2 OS=Mus musculus GN=Psma2 PE=1 SV=3
Q91XV3	Basp1	0.12904,	0.12904	4	Brain acid soluble protein 1 OS=Mus musculus GN=Basp1 PE=1 SV=3
P62838,P61079	Ube2d3 Ube2d2	2.58013,2.37636,	2.47615	2	Ubiquitin-conjugating enzyme E2 D2 OS=Mus musculus GN=Ube2d2 PE=1 SV=1 @Ubiquitin-conjugating enzyme E2 D3 OS=Mus musculus GN=Ube2d3 PE=1 SV=1
P98203	Arvcf	0.29504,0.42372,0.20421,0.19427,0.0,	0.20421	18	Armadillo repeat protein deleted in velo-cardio-facial syndrome homolog OS=Mus musculus GN=Arvcf PE=1 SV=2
P12382	Pfkl	15.31887,9.99542,4.5489,	9.99542	18	6-phosphofructokinase, liver type OS=Mus musculus GN=Pfkl PE=1 SV=4
Q61316	Hspa4	4.98699,0.1275,0.08466,0.14591,	0.1364	13	Heat shock 70 kDa protein 4 OS=Mus musculus GN=Hspa4 PE=1 SV=1
P60229	Eif3e	9.23623,	9.23623	8	Eukaryotic translation initiation factor 3 subunit E OS=Mus musculus GN=Eif3e PE=1 SV=1
P61458	Pcbd1	0.97518,	0.97518	2	Pterin-4-alpha-carbinolamine dehydratase OS=Mus musculus GN=Pcbd1 PE=1 SV=2
P50516	Atp6v1a	0.99787,0.89156,	0.94322	13	V-type proton ATPase catalytic subunit A OS=Mus musculus GN=Atp6v1a PE=1 SV=2
P62843	Rps15	5.06306,2.15319,	3.30178	2	40S ribosomal protein S15 OS=Mus musculus GN=Rps15 PE=2 SV=2
Q8R016	Blmh	6.47773,6.33331,	6.40511	6	Bleomycin hydrolase OS=Mus musculus GN=Blmh PE=1 SV=1
P25444	Rps2	2.8746,	2.8746	5	40S ribosomal protein S2 OS=Mus musculus GN=Rps2 PE=2 SV=3
P61979	Hnrnpk	0.12292,	0.12292	4	Heterogeneous nuclear ribonucleoprotein K OS=Mus musculus GN=Hnrnpk PE=1 SV=1
Q80W21	Gstm7	1.36481,	1.36481	9	Glutathione S-transferase Mu 7 OS=Mus musculus GN=Gstm7 PE=1 SV=1
Q64691	Capn3	5.45757,17.58176,8.6329,	8.6329	11	Calpain-3 OS=Mus musculus GN=Capn3 PE=2 SV=2
P05132	Prkaca	0.5976,	0.5976	3	cAMP-dependent protein kinase catalytic subunit alpha OS=Mus musculus GN=Prkaca PE=1 SV=3
Q99KC8	Vwa5a	1.81655,	1.81655	11	von Willebrand factor A domain-containing protein 5A OS=Mus musculus GN=Vwa5a PE=1 SV=2
P35980	Rpl18	6.24323,6.63693,6.01228,	6.24323	3	60S ribosomal protein L18 OS=Mus musculus GN=Rpl18 PE=2 SV=3
P26638	Sars	7.01861,5.20855,4.65398,6.63695,	5.87953	10	Serine--tRNA ligase, cytoplasmic OS=Mus musculus GN=Sars PE=2 SV=3
Q9DCH4	Eif3f	2.50527,2.50527,	2.50527	6	Eukaryotic translation initiation factor 3 subunit F OS=Mus musculus GN=Eif3f PE=1 SV=2
P42932	Cct8	1.05971,2.51114,	1.63129	6	T-complex protein 1 subunit theta OS=Mus musculus GN=Cct8 PE=1 SV=3
P50396	Gdi1	16.6545,	16.6545	13	Rab GDP dissociation inhibitor alpha OS=Mus musculus GN=Gdi1 PE=1 SV=3
P63001	Rac1	0.96747,0.96747,	0.96747	4	Ras-related C3 botulinum toxin substrate 1 OS=Mus musculus GN=Rac1 PE=1 SV=1
Q8VDN2	Atp1a1	0.5319,0.54829,1.15112,	0.54829	15	Sodium/potassium-transporting ATPase subunit alpha-1 OS=Mus musculus GN=Atp1a1 PE=1 SV=1
Q60675	Lama2	4.69397,3.18656,1.77357,2.6247,0.915,4.27939,7.21243,4.50455,8.16525,4.79327,4.01215,4.2813,	4.28034	42	Laminin subunit alpha-2 OS=Mus musculus GN=Lama2 PE=1 SV=2
O35343	Kpna4	1.85853,1.07821,1.25945,	1.25945	7	Importin subunit alpha-3 OS=Mus musculus GN=Kpna4 PE=1 SV=1
Q3UQ28	Pxdn	0.0,0.01158,0.0,0.002,0.00445,0.02237,0.0,0.03738,	0.01	14	Peroxidasin homolog OS=Mus musculus GN=Pxdn PE=2 SV=2
Q922R8	Pdia6	0.85356,	0.85356	11	Protein disulfide-isomerase A6 OS=Mus musculus GN=Pdia6 PE=1 SV=3
P97371	Psme1	3.49747,	3.49747	2	Proteasome activator complex subunit 1 OS=Mus musculus GN=Psme1 PE=2 SV=2
Q8CGA0	Ppm1f	2.49411,	2.49411	6	Protein phosphatase 1F OS=Mus musculus GN=Ppm1f PE=2 SV=1
Q8R5C5	Actr1b	1.32615,	1.32615	5	Beta-centractin OS=Mus musculus GN=Actr1b PE=1 SV=1
Q9QYC0	Add1	1.01149,0.86469,0.31305,	0.86469	7	Alpha-adducin OS=Mus musculus GN=Add1 PE=1 SV=2
Q8C8R3	Ank2	0.89246,0.99728,0.45056,0.21675,0.1488,0.1488,0.15125,0.23279,0.02402,0.13647,	0.18106	45	Ankyrin-2 OS=Mus musculus GN=Ank2 PE=1 SV=2
Q8K1M6	Dnm1l	5.99954,	5.99954	10	Dynamin-1-like protein OS=Mus musculus GN=Dnm1l PE=1 SV=2
P62900	Rpl31	1.06552,1.06552,	1.06552	4	60S ribosomal protein L31 OS=Mus musculus GN=Rpl31 PE=1 SV=1
Q91WK2	Eif3h	4.28398,	4.28398	3	Eukaryotic translation initiation factor 3 subunit H OS=Mus musculus GN=Eif3h PE=1 SV=1
P12970	Rpl7a	3.45257,	3.45257	2	60S ribosomal protein L7a OS=Mus musculus GN=Rpl7a PE=2 SV=2
Q9JHU4	Dync1h1	3.78483,5.76724,9.58925,6.26585,10.56947,5.61723,0.18726,7.94012,5.59446,100.0,5.07523,100.0,4.41484,	5.76724	58	Cytoplasmic dynein 1 heavy chain 1 OS=Mus musculus GN=Dync1h1 PE=1 SV=2
Q7TNG5	Eml2	3.97747,0.23641,0.01527,100.0,	0.96969	5	Echinoderm microtubule-associated protein-like 2 OS=Mus musculus GN=Eml2 PE=2 SV=1
Q91VH6	Memo1	0.73776,	0.73776	2	Protein MEMO1 OS=Mus musculus GN=Memo1 PE=1 SV=1
Q61001	Lama5	2.56093,3.00829,2.31465,4.5623,3.00829,8.0209,	3.00829	37	Laminin subunit alpha-5 OS=Mus musculus GN=Lama5 PE=1 SV=4
Q8BJY1	Psmd5	1.63473,	1.63473	3	26S proteasome non-ATPase regulatory subunit 5 OS=Mus musculus GN=Psmd5 PE=1 SV=4
P08122	Col4a2	1.12223,1.7774,0.66348,0.71733,1.11293,1.13679,2.76626,	1.12223	53	Collagen alpha-2(IV) chain OS=Mus musculus GN=Col4a2 PE=2 SV=4
P16110	Lgals3	0.1704,	0.1704	2	Galectin-3 OS=Mus musculus GN=Lgals3 PE=1 SV=3
Q9D0I9	Rars	6.19345,5.3002,20.98371,	6.19345	7	Arginine--tRNA ligase, cytoplasmic OS=Mus musculus GN=Rars PE=2 SV=2
P50247	Ahcy	4.02606,4.53961,4.33115,	4.33115	5	Adenosylhomocysteinase OS=Mus musculus GN=Ahcy PE=1 SV=3
Q8BWY3	Etf1	11.39892,	11.3989	3	Eukaryotic peptide chain release factor subunit 1 OS=Mus musculus GN=Etf1 PE=1 SV=4
Q6ZQ38	Cand1	0.99764,	0.99764	10	Cullin-associated NEDD8-dissociated protein 1 OS=Mus musculus GN=Cand1 PE=2 SV=2
Q9CYT6	Cap2	2.12198,	2.12198	7	Adenylyl cyclase-associated protein 2 OS=Mus musculus GN=Cap2 PE=1 SV=1
P42669	Pura	1.62608,	1.62608	1	Transcriptional activator protein Pur-alpha OS=Mus musculus GN=Pura PE=1 SV=1
Q8VDM4	Psmd2	0.02443,	0.02443	6	26S proteasome non-ATPase regulatory subunit 2 OS=Mus musculus GN=Psmd2 PE=1 SV=1
P40124	Cap1	0.38218,	0.38218	5	Adenylyl cyclase-associated protein 1 OS=Mus musculus GN=Cap1 PE=1 SV=4
O88544	Cops4	2.07521,	2.07521	9	COP9 signalosome complex subunit 4 OS=Mus musculus GN=Cops4 PE=1 SV=1
Q9DB05	Napa	1.24433,	1.24433	2	Alpha-soluble NSF attachment protein OS=Mus musculus GN=Napa PE=1 SV=1
P53810	Pitpna	9.1451,	9.1451	3	Phosphatidylinositol transfer protein alpha isoform OS=Mus musculus GN=Pitpna PE=1 SV=2
Q9QXS1	Plec	0.67176,0.78146,0.92925,0.31902,0.69167,0.68182,0.62297,0.56395,0.50365,0.50365,	0.64691	44	Plectin OS=Mus musculus GN=Plec PE=1 SV=2
Q9DCT1	Akr1e2	2.79947,	2.79947	1	1,5-anhydro-D-fructose reductase OS=Mus musculus GN=Akr1e2 PE=1 SV=1
P28236	Gja8	4.35304,1.99311,	2.94552	5	Gap junction alpha-8 protein OS=Mus musculus GN=Gja8 PE=1 SV=2
O70310	Nmt1	1.28504,	1.28504	7	Glycylpeptide N-tetradecanoyltransferase 1 OS=Mus musculus GN=Nmt1 PE=1 SV=1
Q9EPL8	Ipo7	2.90679,1.0304,	1.73066	7	Importin-7 OS=Mus musculus GN=Ipo7 PE=1 SV=2
P68181	Prkacb	0.5976,	0.5976	2	cAMP-dependent protein kinase catalytic subunit beta OS=Mus musculus GN=Prkacb PE=1 SV=2
Q922B2	Dars	2.63237,2.63237,	2.63237	5	Aspartate--tRNA ligase, cytoplasmic OS=Mus musculus GN=Dars PE=2 SV=2
P56563	Lim2	1.23522,	1.23522	2	Lens fiber membrane intrinsic protein OS=Mus musculus GN=Lim2 PE=1 SV=2
P20029	Hspa5	0.10612,4.12957,0.09337,	0.10612	7	78 kDa glucose-regulated protein OS=Mus musculus GN=Hspa5 PE=1 SV=3
Q8CGC7	Eprs	5.11644,6.8031,7.43875,100.0,20.05267,	7.43875	8	Bifunctional glutamate/proline--tRNA ligase OS=Mus musculus GN=Eprs PE=1 SV=4
Q8BK64	Ahsa1	1.56524,	1.56524	2	Activator of 90 kDa heat shock protein ATPase homolog 1 OS=Mus musculus GN=Ahsa1 PE=2 SV=2
Q9DBC7	Prkar1a	0.27201,0.27201,	0.27201	3	cAMP-dependent protein kinase type I-alpha regulatory subunit OS=Mus musculus GN=Prkar1a PE=1 SV=3
P62754	Rps6	0.56524,0.53127,	0.54799	2	40S ribosomal protein S6 OS=Mus musculus GN=Rps6 PE=1 SV=1
Q9QYB8	Add2	0.31305,	0.31305	3	Beta-adducin OS=Mus musculus GN=Add2 PE=1 SV=4
Q60960	Kpna1	0.46207,	0.46207	2	Importin subunit alpha-5 OS=Mus musculus GN=Kpna1 PE=1 SV=2
P24270	Cat	0.30761,	0.30761	4	Catalase OS=Mus musculus GN=Cat PE=1 SV=4
Q8C5W3	Tbcel	1.1445,	1.1445	1	Tubulin-specific chaperone cofactor E-like protein OS=Mus musculus GN=Tbcel PE=1 SV=1
Q9CQQ7	Atp5f1	1.0516,	1.0516	1	ATP synthase F(0) complex subunit B1, mitochondrial OS=Mus musculus GN=Atp5f1 PE=1 SV=1
O54950	Prkag1	1.21901,	1.21901	1	5'-AMP-activated protein kinase subunit gamma-1 OS=Mus musculus GN=Prkag1 PE=1 SV=2
Q05D44	Eif5b	0.57632,	0.57632	5	Eukaryotic translation initiation factor 5B OS=Mus musculus GN=Eif5b PE=1 SV=2
Q6ZQ73	Cand2	1.09253,	1.09253	6	Cullin-associated NEDD8-dissociated protein 2 OS=Mus musculus GN=Cand2 PE=1 SV=2
Q9JJC6	Rilpl1	0.21822,	0.21822	2	RILP-like protein 1 OS=Mus musculus GN=Rilpl1 PE=2 SV=1
P02463	Col4a1	2.53538,2.28402,0.70437,3.0701,2.70921,2.01063,1.45042,1.01287,0.97651,	2.01063	84	Collagen alpha-1(IV) chain OS=Mus musculus GN=Col4a1 PE=2 SV=4
P17426	Ap2a1	0.66264,	0.66264	4	AP-2 complex subunit alpha-1 OS=Mus musculus GN=Ap2a1 PE=1 SV=1
P62270	Rps18	1.67082,	1.67082	1	40S ribosomal protein S18 OS=Mus musculus GN=Rps18 PE=1 SV=3
P62141,P62137,P63087	Ppp1ca Ppp1cc Ppp1cb	0.70023,0.6058,	0.6513	3	Serine/threonine-protein phosphatase PP1-beta catalytic subunit OS=Mus musculus GN=Ppp1cb PE=1 SV=3 @Serine/threonine-protein phosphatase PP1-alpha catalytic subunit OS=Mus musculus GN=Ppp1ca PE=1 SV=1 @Serine/threonine-protein phosphatase PP1-gamma catalytic subunit OS=Mus musculus GN=Ppp1cc PE=1 SV=1
Q9CQM9	Glrx3	3.59683,	3.59683	2	Glutaredoxin-3 OS=Mus musculus GN=Glrx3 PE=1 SV=1
Q6P5F9	Xpo1	1.50393,	1.50393	6	Exportin-1 OS=Mus musculus GN=Xpo1 PE=1 SV=1
P29341	Pabpc1	0.62328,	0.62328	2	Polyadenylate-binding protein 1 OS=Mus musculus GN=Pabpc1 PE=1 SV=2
P15116	Cdh2	0.70377,0.53111,	0.61138	4	Cadherin-2 OS=Mus musculus GN=Cdh2 PE=1 SV=2
P45376	Akr1b1	2.01222,	2.01222	1	Aldose reductase OS=Mus musculus GN=Akr1b1 PE=1 SV=3
Q9QZB7	Actr10	1.53906,	1.53906	3	Actin-related protein 10 OS=Mus musculus GN=Actr10 PE=1 SV=2
Q9QZS0	Col4a3	27.16799,	27.168	24	Collagen alpha-3(IV) chain OS=Mus musculus GN=Col4a3 PE=1 SV=2
P54822	Adsl	1.7224,	1.7224	1	Adenylosuccinate lyase OS=Mus musculus GN=Adsl PE=2 SV=2
P19096	Fasn	0.70354,1.11811,	0.88693	7	Fatty acid synthase OS=Mus musculus GN=Fasn PE=1 SV=2
P63038	Hspd1	0.58989,	0.58989	1	60 kDa heat shock protein, mitochondrial OS=Mus musculus GN=Hspd1 PE=1 SV=1
P48193	Epb41	1.54534,	1.54534	3	Protein 4.1 OS=Mus musculus GN=Epb41 PE=1 SV=2
P47757	Capzb	2.14878,	2.14878	1	F-actin-capping protein subunit beta OS=Mus musculus GN=Capzb PE=1 SV=3
Q9DB77	Uqcrc2	0.2918,	0.2918	1	Cytochrome b-c1 complex subunit 2, mitochondrial OS=Mus musculus GN=Uqcrc2 PE=1 SV=1
O88543	Cops3	0.44125,	0.44125	2	COP9 signalosome complex subunit 3 OS=Mus musculus GN=Cops3 PE=1 SV=3
Q99KJ8	Dctn2	0.73189,1.65388,	1.10021	2	Dynactin subunit 2 OS=Mus musculus GN=Dctn2 PE=1 SV=3
Q9EQ80	Nif3l1	2.84059,	2.84059	2	Putative GTP cyclohydrolase 1 type 2 Nif3l1 OS=Mus musculus GN=Nif3l1 PE=1 SV=4
Q8BHN3	Ganab	0.31468,	0.31468	1	Neutral alpha-glucosidase AB OS=Mus musculus GN=Ganab PE=1 SV=1
Q9WU78	Pdcd6ip	0.67022,0.77511,	0.72076	4	Programmed cell death 6-interacting protein OS=Mus musculus GN=Pdcd6ip PE=1 SV=3
Q9R0Q6	Arpc1a	2.04351,	2.04351	1	Actin-related protein 2/3 complex subunit 1A OS=Mus musculus GN=Arpc1a PE=1 SV=1
Q91W89	Man2c1	2.20118,	2.20118	3	Alpha-mannosidase 2C1 OS=Mus musculus GN=Man2c1 PE=2 SV=1
Q9Z1Q9	Vars	1.52794,	1.52794	5	Valine--tRNA ligase OS=Mus musculus GN=Vars PE=2 SV=1
O88322	Nid2	3.76766,	3.76766	2	Nidogen-2 OS=Mus musculus GN=Nid2 PE=1 SV=2
Q80UM3	Naa15	7.38922,	7.38922	1	N-alpha-acetyltransferase 15, NatA auxiliary subunit OS=Mus musculus GN=Naa15 PE=1 SV=1
Q9JLV5	Cul3	3.60369,	3.60369	4	Cullin-3 OS=Mus musculus GN=Cul3 PE=1 SV=1
Q70IV5	Synm	0.12976,	0.12976	2	Synemin OS=Mus musculus GN=Synm PE=1 SV=2
P70398	Usp9x	1.23377,	1.23377	7	Probable ubiquitin carboxyl-terminal hydrolase FAF-X OS=Mus musculus GN=Usp9x PE=1 SV=2
Q5SQX6	Cyfip2	1.07283,	1.07283	3	Cytoplasmic FMR1-interacting protein 2 OS=Mus musculus GN=Cyfip2 PE=1 SV=2
Q64331	Myo6	0.1875,	0.1875	2	Unconventional myosin-VI OS=Mus musculus GN=Myo6 PE=1 SV=1
Q8BTM8	Flna	0.37754,	0.37754	3	Filamin-A OS=Mus musculus GN=Flna PE=1 SV=5
Q80X90	Flnb	0.66636,0.66636,	0.66636	3	Filamin-B OS=Mus musculus GN=Flnb PE=1 SV=3
Q71LX4	Tln2	1.69481,	1.69481	1	Talin-2 OS=Mus musculus GN=Tln2 PE=1 SV=3
A2ASQ1	Agrn	2.85648,	2.85648	1	Agrin OS=Mus musculus GN=Agrn PE=1 SV=1
P13707	Gpd1		14N Only	23	Glycerol-3-phosphate dehydrogenase [NAD(+)], cytoplasmic OS=Mus musculus GN=Gpd1 PE=1 SV=3 ;
Q9WUL7	Arl3		14N Only	6	ADP-ribosylation factor-like protein 3 OS=Mus musculus GN=Arl3 PE=1 SV=1 ;
P08030	Aprt		14N Only	3	Adenine phosphoribosyltransferase OS=Mus musculus GN=Aprt PE=1 SV=2 ;
P62821	Rab1A		14N Only	11	Ras-related protein Rab-1A OS=Mus musculus GN=Rab1A PE=1 SV=3 ;
P61205,P84078	Arf3,Arf1		14N Only	13	ADP-ribosylation factor 3 OS=Mus musculus GN=Arf3 PE=2 SV=2 ;ADP-ribosylation factor 1 OS=Mus musculus GN=Arf1 PE=1 SV=2 ;
P62301	Rps13		14N Only	4	40S ribosomal protein S13 OS=Mus musculus GN=Rps13 PE=1 SV=2 ;
P63011	Rab3a		14N Only	5	Ras-related protein Rab-3A OS=Mus musculus GN=Rab3a PE=1 SV=1 ;
P28474	Adh5		14N Only	10	Alcohol dehydrogenase class-3 OS=Mus musculus GN=Adh5 PE=1 SV=3 ;
Q3ULJ0	Gpd1l		14N Only	8	Glycerol-3-phosphate dehydrogenase 1-like protein OS=Mus musculus GN=Gpd1l PE=1 SV=2 ;
P62823	Rab3c		14N Only	8	Ras-related protein Rab-3C OS=Mus musculus GN=Rab3c PE=1 SV=1 ;
Q9R1P1	Psmb3		14N Only	7	Proteasome subunit beta type-3 OS=Mus musculus GN=Psmb3 PE=1 SV=1 ;
P63242	Eif5a		14N Only	2	Eukaryotic translation initiation factor 5A-1 OS=Mus musculus GN=Eif5a PE=1 SV=2 ;
P23506	Pcmt1		14N Only	2	Protein-L-isoaspartate(D-aspartate) O-methyltransferase OS=Mus musculus GN=Pcmt1 PE=1 SV=3 ;
Q9Z2U1	Psma5		14N Only	7	Proteasome subunit alpha type-5 OS=Mus musculus GN=Psma5 PE=1 SV=1 ;
P61759	Vbp1		14N Only	3	Prefoldin subunit 3 OS=Mus musculus GN=Vbp1 PE=2 SV=2 ;
Q9D892	Itpa		14N Only	3	Inosine triphosphate pyrophosphatase OS=Mus musculus GN=Itpa PE=1 SV=2 ;
Q920E5	Fdps		14N Only	8	Farnesyl pyrophosphate synthase OS=Mus musculus GN=Fdps PE=1 SV=1 ;
P0CG49,P62984,P62983,P0CG50	Ubb,Uba52,Rps27a,Ubc		14N Only	2	Polyubiquitin-B OS=Mus musculus GN=Ubb PE=2 SV=1 ;Ubiquitin-60S ribosomal protein L40 OS=Mus musculus GN=Uba52 PE=1 SV=2 ;Ubiquitin-40S ribosomal protein S27a OS=Mus musculus GN=Rps27a PE=1 SV=2 ;Polyubiquitin-C OS=Mus musculus GN=Ubc PE=1 SV=2 ;
P14901	Hmox1		14N Only	5	Heme oxygenase 1 OS=Mus musculus GN=Hmox1 PE=1 SV=1 ;
Q9D1G1	Rab1b		14N Only	8	Ras-related protein Rab-1B OS=Mus musculus GN=Rab1b PE=1 SV=1 ;
Q9CWJ9	Atic		14N Only	9	Bifunctional purine biosynthesis protein PURH OS=Mus musculus GN=Atic PE=1 SV=2 ;
O35215	Ddt		14N Only	1	D-dopachrome decarboxylase OS=Mus musculus GN=Ddt PE=1 SV=3 ;
Q61206	Pafah1b2		14N Only	4	Platelet-activating factor acetylhydrolase IB subunit beta OS=Mus musculus GN=Pafah1b2 PE=1 SV=2 ;
P26516	Psmd7		14N Only	3	26S proteasome non-ATPase regulatory subunit 7 OS=Mus musculus GN=Psmd7 PE=1 SV=2 ;
P51881	Slc25a5		14N Only	13	ADP/ATP translocase 2 OS=Mus musculus GN=Slc25a5 PE=1 SV=3 ;
P48962	Slc25a4		14N Only	13	ADP/ATP translocase 1 OS=Mus musculus GN=Slc25a4 PE=1 SV=4 ;
Q9CZT8	Rab3b		14N Only	6	Ras-related protein Rab-3B OS=Mus musculus GN=Rab3b PE=1 SV=1 ;
P47199	Cryz		14N Only	4	Quinone oxidoreductase OS=Mus musculus GN=Cryz PE=1 SV=1 ;
P63276	Rps17		14N Only	3	40S ribosomal protein S17 OS=Mus musculus GN=Rps17 PE=1 SV=2 ;
Q9D8B4	Ndufa11		14N Only	2	NADH dehydrogenase [ubiquinone] 1 alpha subcomplex subunit 11 OS=Mus musculus GN=Ndufa11 PE=2 SV=2 ;
Q9CVB6	Arpc2		14N Only	4	Actin-related protein 2/3 complex subunit 2 OS=Mus musculus GN=Arpc2 PE=1 SV=3 ;
P51807	Dynlt1		14N Only	1	Dynein light chain Tctex-type 1 OS=Mus musculus GN=Dynlt1 PE=1 SV=1 ;
Q9D142	Nudt14		14N Only	2	Uridine diphosphate glucose pyrophosphatase OS=Mus musculus GN=Nudt14 PE=2 SV=1 ;
Q9R1P3	Psmb2		14N Only	2	Proteasome subunit beta type-2 OS=Mus musculus GN=Psmb2 PE=1 SV=1 ;
P62196	Psmc5		14N Only	4	26S protease regulatory subunit 8 OS=Mus musculus GN=Psmc5 PE=1 SV=1 ;
Q9CQD1	Rab5a		14N Only	7	Ras-related protein Rab-5A OS=Mus musculus GN=Rab5a PE=1 SV=1 ;
Q9R1P4	Psma1		14N Only	2	Proteasome subunit alpha type-1 OS=Mus musculus GN=Psma1 PE=1 SV=1 ;
P07091	S100a4		14N Only	2	Protein S100-A4 OS=Mus musculus GN=S100a4 PE=1 SV=1 ;
P68037	Ube2l3		14N Only	2	Ubiquitin-conjugating enzyme E2 L3 OS=Mus musculus GN=Ube2l3 PE=2 SV=1 ;
P62830	Rpl23		14N Only	2	60S ribosomal protein L23 OS=Mus musculus GN=Rpl23 PE=1 SV=1 ;
Q9CQC9	Sar1b		14N Only	1	GTP-binding protein SAR1b OS=Mus musculus GN=Sar1b PE=1 SV=1 ;
Q91WQ3	Yars		14N Only	6	Tyrosine--tRNA ligase, cytoplasmic OS=Mus musculus GN=Yars PE=2 SV=3 ;
P61087	Ube2k		14N Only	2	Ubiquitin-conjugating enzyme E2 K OS=Mus musculus GN=Ube2k PE=1 SV=3 ;
P53026	Rpl10a		14N Only	2	60S ribosomal protein L10a OS=Mus musculus GN=Rpl10a PE=1 SV=3 ;
P27659	Rpl3		14N Only	5	60S ribosomal protein L3 OS=Mus musculus GN=Rpl3 PE=1 SV=3 ;
Q8BZF8	Pgm5		14N Only	7	Phosphoglucomutase-like protein 5 OS=Mus musculus GN=Pgm5 PE=1 SV=2 ;
O35969	Gamt		14N Only	2	Guanidinoacetate N-methyltransferase OS=Mus musculus GN=Gamt PE=1 SV=1 ;
Q9CZM2	Rpl15		14N Only	3	60S ribosomal protein L15 OS=Mus musculus GN=Rpl15 PE=2 SV=4 ;
Q9QUM9	Psma6		14N Only	7	Proteasome subunit alpha type-6 OS=Mus musculus GN=Psma6 PE=1 SV=1 ;
Q91ZR1	Rab4b		14N Only	5	Ras-related protein Rab-4B OS=Mus musculus GN=Rab4b PE=2 SV=2 ;
P62746	Rhob		14N Only	1	Rho-related GTP-binding protein RhoB OS=Mus musculus GN=Rhob PE=1 SV=1 ;
Q9CZ30	Ola1		14N Only	4	Obg-like ATPase 1 OS=Mus musculus GN=Ola1 PE=1 SV=1 ;
Q9D0B6	Pbdc1		14N Only	2	Protein PBDC1 OS=Mus musculus GN=Pbdc1 PE=2 SV=1 ;
Q9R0N0	Galk1		14N Only	6	Galactokinase OS=Mus musculus GN=Galk1 PE=2 SV=2 ;
P45591	Cfl2		14N Only	1	Cofilin-2 OS=Mus musculus GN=Cfl2 PE=1 SV=1 ;
Q99K85	Psat1		14N Only	4	Phosphoserine aminotransferase OS=Mus musculus GN=Psat1 PE=1 SV=1 ;
Q9Z2W0	Dnpep		14N Only	5	Aspartyl aminopeptidase OS=Mus musculus GN=Dnpep PE=2 SV=2 ;
P60335	Pcbp1		14N Only	2	Poly(rC)-binding protein 1 OS=Mus musculus GN=Pcbp1 PE=1 SV=1 ;
P47911	Rpl6		14N Only	3	60S ribosomal protein L6 OS=Mus musculus GN=Rpl6 PE=1 SV=3 ;
P61164	Actr1a		14N Only	7	Alpha-centractin OS=Mus musculus GN=Actr1a PE=2 SV=1 ;
P36536	Sar1a		14N Only	1	GTP-binding protein SAR1a OS=Mus musculus GN=Sar1a PE=2 SV=1 ;
Q61035	Hars		14N Only	2	Histidine--tRNA ligase, cytoplasmic OS=Mus musculus GN=Hars PE=2 SV=2 ;
Q9WVJ2	Psmd13		14N Only	2	26S proteasome non-ATPase regulatory subunit 13 OS=Mus musculus GN=Psmd13 PE=1 SV=1 ;
Q9R062	Gyg1		14N Only	2	Glycogenin-1 OS=Mus musculus GN=Gyg1 PE=2 SV=3 ;
P59999	Arpc4		14N Only	2	Actin-related protein 2/3 complex subunit 4 OS=Mus musculus GN=Arpc4 PE=1 SV=3 ;
O35593	Psmd14		14N Only	4	26S proteasome non-ATPase regulatory subunit 14 OS=Mus musculus GN=Psmd14 PE=1 SV=2 ;
P61971	Nutf2		14N Only	1	Nuclear transport factor 2 OS=Mus musculus GN=Nutf2 PE=2 SV=1 ;
Q9CZ04	Cops7a		14N Only	5	COP9 signalosome complex subunit 7a OS=Mus musculus GN=Cops7a PE=1 SV=2 ;
Q9DBZ5	Eif3k		14N Only	1	Eukaryotic translation initiation factor 3 subunit K OS=Mus musculus GN=Eif3k PE=1 SV=1 ;
P48758	Cbr1		14N Only	5	Carbonyl reductase [NADPH] 1 OS=Mus musculus GN=Cbr1 PE=1 SV=3 ;
Q9WTP6	Ak2		14N Only	1	Adenylate kinase 2, mitochondrial OS=Mus musculus GN=Ak2 PE=1 SV=5 ;
Q61205	Pafah1b3		14N Only	2	Platelet-activating factor acetylhydrolase IB subunit gamma OS=Mus musculus GN=Pafah1b3 PE=1 SV=1 ;
Q9R0Y5	Ak1		14N Only	6	Adenylate kinase isoenzyme 1 OS=Mus musculus GN=Ak1 PE=1 SV=1 ;
Q9CZX8	Rps19		14N Only	3	40S ribosomal protein S19 OS=Mus musculus GN=Rps19 PE=1 SV=3 ;
Q923D2	Blvrb		14N Only	4	Flavin reductase (NADPH) OS=Mus musculus GN=Blvrb PE=2 SV=3 ;
Q9CR57	Rpl14		14N Only	3	60S ribosomal protein L14 OS=Mus musculus GN=Rpl14 PE=1 SV=3 ;
Q921Z5	Tnfaip8		14N Only	1	Tumor necrosis factor alpha-induced protein 8 OS=Mus musculus GN=Tnfaip8 PE=2 SV=1 ;
O88685	Psmc3		14N Only	3	26S protease regulatory subunit 6A OS=Mus musculus GN=Psmc3 PE=1 SV=2 ;
O08756	Hsd17b10		14N Only	2	3-hydroxyacyl-CoA dehydrogenase type-2 OS=Mus musculus GN=Hsd17b10 PE=1 SV=4 ;
Q91YI0	Asl		14N Only	1	Argininosuccinate lyase OS=Mus musculus GN=Asl PE=1 SV=1 ;
Q61239	Fnta		14N Only	2	Protein farnesyltransferase/geranylgeranyltransferase type-1 subunit alpha OS=Mus musculus GN=Fnta PE=1 SV=1 ;
P56380	Nudt2		14N Only	2	Bis(5'-nucleosyl)-tetraphosphatase [asymmetrical] OS=Mus musculus GN=Nudt2 PE=1 SV=3 ;
P47964	Rpl36		14N Only	1	60S ribosomal protein L36 OS=Mus musculus GN=Rpl36 PE=2 SV=2 ;
Q8BFY9	Tnpo1		14N Only	7	Transportin-1 OS=Mus musculus GN=Tnpo1 PE=1 SV=2 ;
P02535	Krt10		14N Only	5	Keratin, type I cytoskeletal 10 OS=Mus musculus GN=Krt10 PE=1 SV=3 ;
Q9CQC6	Bzw1		14N Only	4	Basic leucine zipper and W2 domain-containing protein 1 OS=Mus musculus GN=Bzw1 PE=1 SV=1 ;
P60766	Cdc42		14N Only	1	Cell division control protein 42 homolog OS=Mus musculus GN=Cdc42 PE=1 SV=2 ;
P35278	Rab5c		14N Only	2	Ras-related protein Rab-5C OS=Mus musculus GN=Rab5c PE=1 SV=2 ;
Q9DCS2	Mettl26		14N Only	6	Methyltransferase-like 26
P62852	Rps25		14N Only	1	40S ribosomal protein S25 OS=Mus musculus GN=Rps25 PE=1 SV=1 ;
Q01730	Rsu1		14N Only	1	Ras suppressor protein 1 OS=Mus musculus GN=Rsu1 PE=2 SV=3 ;
Q9CZD3	Gars		14N Only	3	Glycine--tRNA ligase OS=Mus musculus GN=Gars PE=1 SV=1 ;
O89112	Lancl1		14N Only	3	LanC-like protein 1 OS=Mus musculus GN=Lancl1 PE=1 SV=1 ;
Q8BP48	Metap1		14N Only	2	Methionine aminopeptidase 1 OS=Mus musculus GN=Metap1 PE=2 SV=1 ;
P08228	Sod1		14N Only	1	Superoxide dismutase [Cu-Zn] OS=Mus musculus GN=Sod1 PE=1 SV=2 ;
P97346	Nxn		14N Only	3	Nucleoredoxin OS=Mus musculus GN=Nxn PE=1 SV=1 ;
P62751	Rpl23a		14N Only	1	60S ribosomal protein L23a OS=Mus musculus GN=Rpl23a PE=1 SV=1 ;
P97494	Gclc		14N Only	4	Glutamate--cysteine ligase catalytic subunit OS=Mus musculus GN=Gclc PE=2 SV=4 ;
Q60931	Vdac3		14N Only	3	Voltage-dependent anion-selective channel protein 3 OS=Mus musculus GN=Vdac3 PE=1 SV=1 ;
Q9Z2U0	Psma7		14N Only	2	Proteasome subunit alpha type-7 OS=Mus musculus GN=Psma7 PE=1 SV=1 ;
P62717	Rpl18a		14N Only	1	60S ribosomal protein L18a OS=Mus musculus GN=Rpl18a PE=1 SV=1 ;
Q9CXW4	Rpl11		14N Only	1	60S ribosomal protein L11 OS=Mus musculus GN=Rpl11 PE=1 SV=4 ;
Q60932	Vdac1		14N Only	5	Voltage-dependent anion-selective channel protein 1 OS=Mus musculus GN=Vdac1 PE=1 SV=3 ;
P60879	Snap25		14N Only	1	Synaptosomal-associated protein 25 OS=Mus musculus GN=Snap25 PE=1 SV=1 ;
Q11011	Npepps		14N Only	7	Puromycin-sensitive aminopeptidase OS=Mus musculus GN=Npepps PE=1 SV=2 ;
Q9CR68	Uqcrfs1		14N Only	2	Cytochrome b-c1 complex subunit Rieske, mitochondrial OS=Mus musculus GN=Uqcrfs1 PE=1 SV=1 ;
P62267	Rps23		14N Only	1	40S ribosomal protein S23 OS=Mus musculus GN=Rps23 PE=1 SV=3 ;
P50580	Pa2g4		14N Only	2	Proliferation-associated protein 2G4 OS=Mus musculus GN=Pa2g4 PE=1 SV=3 ;
Q9ERS2	Ndufa13		14N Only	1	NADH dehydrogenase [ubiquinone] 1 alpha subcomplex subunit 13 OS=Mus musculus GN=Ndufa13 PE=1 SV=3 ;
Q99JI4	Psmd6		14N Only	2	26S proteasome non-ATPase regulatory subunit 6 OS=Mus musculus GN=Psmd6 PE=1 SV=1 ;
P62911	Rpl32		14N Only	1	60S ribosomal protein L32 OS=Mus musculus GN=Rpl32 PE=1 SV=2 ;
Q8VEM8	Slc25a3		14N Only	1	Phosphate carrier protein, mitochondrial OS=Mus musculus GN=Slc25a3 PE=1 SV=1 ;
Q8BVI4	Qdpr		14N Only	1	Dihydropteridine reductase OS=Mus musculus GN=Qdpr PE=1 SV=2 ;
Q9CRB9	Chchd3		14N Only	1	Coiled-coil-helix-coiled-coil-helix domain-containing protein 3, mitochondrial OS=Mus musculus GN=Chchd3 PE=1 SV=1 ;
Q9D646	Krt34		14N Only	3	Keratin, type I cuticular Ha4 OS=Mus musculus GN=Krt34 PE=2 SV=1 ;
P14685	Psmd3		14N Only	3	26S proteasome non-ATPase regulatory subunit 3 OS=Mus musculus GN=Psmd3 PE=1 SV=3 ;
P97351	Rps3a		14N Only	2	40S ribosomal protein S3a OS=Mus musculus GN=Rps3a PE=1 SV=3 ;
Q8BV13	Cops7b		14N Only	1	COP9 signalosome complex subunit 7b OS=Mus musculus GN=Cops7b PE=1 SV=1 ;
Q91ZJ5	Ugp2		14N Only	2	UTP--glucose-1-phosphate uridylyltransferase OS=Mus musculus GN=Ugp2 PE=2 SV=3 ;
P63085	Mapk1		14N Only	2	Mitogen-activated protein kinase 1 OS=Mus musculus GN=Mapk1 PE=1 SV=3 ;
P97372	Psme2		14N Only	2	Proteasome activator complex subunit 2 OS=Mus musculus GN=Psme2 PE=2 SV=4 ;
O70251	Eef1b		14N Only	1	Elongation factor 1-beta OS=Mus musculus GN=Eef1b PE=1 SV=5 ;
Q9ER72	Cars		14N Only	7	Cysteine--tRNA ligase, cytoplasmic OS=Mus musculus GN=Cars PE=2 SV=2 ;
Q8BH44	Coro2b		14N Only	2	Coronin-2B OS=Mus musculus GN=Coro2b PE=2 SV=2 ;
Q9JLJ2	Aldh9a1		14N Only	2	4-trimethylaminobutyraldehyde dehydrogenase OS=Mus musculus GN=Aldh9a1 PE=1 SV=1 ;
P46471	Psmc2		14N Only	2	26S protease regulatory subunit 7 OS=Mus musculus GN=Psmc2 PE=1 SV=5 ;
Q9CZC8	Scrn1		14N Only	3	Secernin-1 OS=Mus musculus GN=Scrn1 PE=1 SV=1 ;
P47754	Capza2		14N Only	1	F-actin-capping protein subunit alpha-2 OS=Mus musculus GN=Capza2 PE=1 SV=3 ;
P00920	Ca2		14N Only	1	Carbonic anhydrase 2 OS=Mus musculus GN=Ca2 PE=1 SV=4 ;
P47963	Rpl13		14N Only	1	60S ribosomal protein L13 OS=Mus musculus GN=Rpl13 PE=2 SV=3 ;
P62192	Psmc1		14N Only	2	26S protease regulatory subunit 4 OS=Mus musculus GN=Psmc1 PE=1 SV=1 ;
Q64105	Spr		14N Only	2	Sepiapterin reductase OS=Mus musculus GN=Spr PE=1 SV=1 ;
Q6P069	Sri		14N Only	2	Sorcin OS=Mus musculus GN=Sri PE=1 SV=1 ;
P46638,P62492	Rab11b,Rab11a		14N Only	1	Ras-related protein Rab-11B OS=Mus musculus GN=Rab11b PE=1 SV=3 ;Ras-related protein Rab-11A OS=Mus musculus GN=Rab11a PE=1 SV=3 ;
Q505B7	Zbtb8os		14N Only	1	Protein archease OS=Mus musculus GN=Zbtb8os PE=2 SV=2 ;
Q9CR09	Ufc1		14N Only	1	Ubiquitin-fold modifier-conjugating enzyme 1 OS=Mus musculus GN=Ufc1 PE=2 SV=1 ;
P06801	Me1		14N Only	2	NADP-dependent malic enzyme OS=Mus musculus GN=Me1 PE=1 SV=2 ;
Q9JII6	Akr1a1		14N Only	4	Alcohol dehydrogenase [NADP(+)] OS=Mus musculus GN=Akr1a1 PE=1 SV=3 ;
P35279,P61294	Rab6a,Rab6b		14N Only	1	Ras-related protein Rab-6A OS=Mus musculus GN=Rab6a PE=1 SV=4 ;Ras-related protein Rab-6B OS=Mus musculus GN=Rab6b PE=1 SV=1 ;
Q9DBL7	Coasy		14N Only	1	Bifunctional coenzyme A synthase OS=Mus musculus GN=Coasy PE=1 SV=2 ;
O35864	Cops5		14N Only	1	COP9 signalosome complex subunit 5 OS=Mus musculus GN=Cops5 PE=1 SV=3 ;
P23116	Eif3a		14N Only	7	Eukaryotic translation initiation factor 3 subunit A OS=Mus musculus GN=Eif3a PE=1 SV=5 ;
Q99LG2	Tnpo2		14N Only	4	Transportin-2 OS=Mus musculus GN=Tnpo2 PE=2 SV=1 ;
O70325,Q91XR9	Gpx4,Gpx4		14N Only	3	Phospholipid hydroperoxide glutathione peroxidase, mitochondrial OS=Mus musculus GN=Gpx4 PE=1 SV=4 ;Phospholipid hydroperoxide glutathione peroxidase, nuclear OS=Mus musculus GN=Gpx4 PE=2 SV=3 ;
Q61553	Fscn1		14N Only	4	Fascin OS=Mus musculus GN=Fscn1 PE=1 SV=4 ;
P22907	Hmbs		14N Only	2	Porphobilinogen deaminase OS=Mus musculus GN=Hmbs PE=1 SV=2 ;
Q9D819	Ppa1		14N Only	3	Inorganic pyrophosphatase OS=Mus musculus GN=Ppa1 PE=1 SV=1 ;
P63325	Rps10		14N Only	1	40S ribosomal protein S10 OS=Mus musculus GN=Rps10 PE=1 SV=1 ;
Q8VDK1	Nit1		14N Only	1	Nitrilase homolog 1 OS=Mus musculus GN=Nit1 PE=2 SV=2 ;
O35682	Myadm		14N Only	1	Myeloid-associated differentiation marker OS=Mus musculus GN=Myadm PE=2 SV=2 ;
Q9D7X8	Ggct		14N Only	1	Gamma-glutamylcyclotransferase OS=Mus musculus GN=Ggct PE=1 SV=1 ;
Q8BZW8	Nhlrc2		14N Only	1	NHL repeat-containing protein 2 OS=Mus musculus GN=Nhlrc2 PE=2 SV=1 ;
Q80X95	Rraga		14N Only	2	Ras-related GTP-binding protein A OS=Mus musculus GN=Rraga PE=2 SV=1 ;
P63073	Eif4e		14N Only	1	Eukaryotic translation initiation factor 4E OS=Mus musculus GN=Eif4e PE=1 SV=1 ;
P56399	Usp5		14N Only	3	Ubiquitin carboxyl-terminal hydrolase 5 OS=Mus musculus GN=Usp5 PE=1 SV=1 ;
Q63844	Mapk3		14N Only	1	Mitogen-activated protein kinase 3 OS=Mus musculus GN=Mapk3 PE=1 SV=5 ;
Q3UM45	Ppp1r7		14N Only	4	Protein phosphatase 1 regulatory subunit 7 OS=Mus musculus GN=Ppp1r7 PE=1 SV=2 ;
Q60737	Csnk2a1		14N Only	1	Casein kinase II subunit alpha OS=Mus musculus GN=Csnk2a1 PE=1 SV=2 ;
Q9DCZ1	Gmpr		14N Only	1	GMP reductase 1 OS=Mus musculus GN=Gmpr PE=2 SV=1 ;
P62715,P63330	Ppp2cb,Ppp2ca		14N Only	1	Serine/threonine-protein phosphatase 2A catalytic subunit beta isoform OS=Mus musculus GN=Ppp2cb PE=1 SV=1 ;Serine/threonine-protein phosphatase 2A catalytic subunit alpha isoform OS=Mus musculus GN=Ppp2ca PE=1 SV=1 ;
Q8JZQ9	Eif3b		14N Only	2	Eukaryotic translation initiation factor 3 subunit B OS=Mus musculus GN=Eif3b PE=1 SV=1 ;
Q60631	Grb2		14N Only	1	Growth factor receptor-bound protein 2 OS=Mus musculus GN=Grb2 PE=1 SV=1 ;
Q6NSR8	Npepl1		14N Only	1	Probable aminopeptidase NPEPL1 OS=Mus musculus GN=Npepl1 PE=2 SV=1 ;
Q9CQA3	Sdhb		14N Only	1	Succinate dehydrogenase [ubiquinone] iron-sulfur subunit, mitochondrial OS=Mus musculus GN=Sdhb PE=1 SV=1 ;
P62918	Rpl8		14N Only	1	60S ribosomal protein L8 OS=Mus musculus GN=Rpl8 PE=2 SV=2 ;
Q9WUM4	Coro1c		14N Only	1	Coronin-1C OS=Mus musculus GN=Coro1c PE=1 SV=2 ;
Q60736	Zp3r		14N Only	1	Zona pellucida sperm-binding protein 3 receptor OS=Mus musculus GN=Zp3r PE=1 SV=1 ;
Q9DB72	Btbd17		14N Only	1	BTB/POZ domain-containing protein 17 OS=Mus musculus GN=Btbd17 PE=2 SV=1 ;
Q8VE47	Uba5		14N Only	1	Ubiquitin-like modifier-activating enzyme 5 OS=Mus musculus GN=Uba5 PE=2 SV=2 ;
Q01755	Tcp11		14N Only	1	T-complex protein 11 OS=Mus musculus GN=Tcp11 PE=2 SV=1 ;
P62814	Atp6v1b2		14N Only	2	V-type proton ATPase subunit B, brain isoform OS=Mus musculus GN=Atp6v1b2 PE=1 SV=1 ;
O35643	Ap1b1		14N Only	3	AP-1 complex subunit beta-1 OS=Mus musculus GN=Ap1b1 PE=2 SV=2 ;
Q924M7	Mpi		14N Only	1	Mannose-6-phosphate isomerase OS=Mus musculus GN=Mpi PE=2 SV=1 ;
P19137	Lama1		14N Only	13	Laminin subunit alpha-1 OS=Mus musculus GN=Lama1 PE=1 SV=1 ;
Reverse_sp|Q60967|PAPS1_MOUSE	Papss1		14N Only	1	Bifunctional 3'-phosphoadenosine 5'-phosphosulfate synthase 1 OS=Mus musculus GN=Papss1 PE=1 SV=1 ;
Q91WU5	As3mt		14N Only	1	Arsenite methyltransferase OS=Mus musculus GN=As3mt PE=2 SV=2 ;
P04104	Krt1		14N Only	3	Keratin, type II cytoskeletal 1 OS=Mus musculus GN=Krt1 PE=1 SV=4 ;
O70194	Eif3d		14N Only	2	Eukaryotic translation initiation factor 3 subunit D OS=Mus musculus GN=Eif3d PE=1 SV=2 ;
P61161	Actr2		14N Only	1	Actin-related protein 2 OS=Mus musculus GN=Actr2 PE=1 SV=1 ;
Q93092	Taldo1		14N Only	1	Transaldolase OS=Mus musculus GN=Taldo1 PE=1 SV=2 ;
P48722	Hspa4l		14N Only	3	Heat shock 70 kDa protein 4L OS=Mus musculus GN=Hspa4l PE=1 SV=2 ;
Q9QYH6	Maged1		14N Only	1	Melanoma-associated antigen D1 OS=Mus musculus GN=Maged1 PE=1 SV=1 ;
Q60864	Stip1		14N Only	2	Stress-induced-phosphoprotein 1 OS=Mus musculus GN=Stip1 PE=1 SV=1 ;
Q9Z1K6	Arih2		14N Only	3	E3 ubiquitin-protein ligase ARIH2 OS=Mus musculus GN=Arih2 PE=1 SV=1 ;
Q8BFS6	Cpped1		14N Only	1	Calcineurin-like phosphoesterase domain-containing protein 1 OS=Mus musculus GN=Cpped1 PE=2 SV=1 ;
O70435	Psma3		14N Only	1	Proteasome subunit alpha type-3 OS=Mus musculus GN=Psma3 PE=1 SV=3 ;
Q8R1B4	Eif3c		14N Only	2	Eukaryotic translation initiation factor 3 subunit C OS=Mus musculus GN=Eif3c PE=1 SV=1 ;
Q9EQQ9	Mgea5		14N Only	2	Bifunctional protein NCOAT OS=Mus musculus GN=Mgea5 PE=1 SV=2 ;
Q8BP47	Nars		14N Only	2	Asparagine--tRNA ligase, cytoplasmic OS=Mus musculus GN=Nars PE=1 SV=2 ;
Q99LF4	Rtcb		14N Only	1	tRNA-splicing ligase RtcB homolog OS=Mus musculus GN=Rtcb PE=2 SV=1 ;
Q6P1F6,Q925E7,Q6ZWR4	Ppp2r2a,Ppp2r2d,Ppp2r2b		14N Only	2	Serine/threonine-protein phosphatase 2A 55 kDa regulatory subunit B alpha isoform OS=Mus musculus GN=Ppp2r2a PE=1 SV=1 ;Serine/threonine-protein phosphatase 2A 55 kDa regulatory subunit B delta isoform OS=Mus musculus GN=Ppp2r2d PE=2 SV=1 ;Serine/threonine-protein phosphatase 2A 55 kDa regulatory subunit B beta isoform OS=Mus musculus GN=Ppp2r2b PE=1 SV=1 ;
P30416	Fkbp4		14N Only	2	Peptidyl-prolyl cis-trans isomerase FKBP4 OS=Mus musculus GN=Fkbp4 PE=1 SV=5 ;
P35235	Ptpn11		14N Only	3	Tyrosine-protein phosphatase non-receptor type 11 OS=Mus musculus GN=Ptpn11 PE=1 SV=2 ;
P61202	Cops2		14N Only	1	COP9 signalosome complex subunit 2 OS=Mus musculus GN=Cops2 PE=1 SV=1 ;
Q99KK7	Dpp3		14N Only	1	Dipeptidyl peptidase 3 OS=Mus musculus GN=Dpp3 PE=2 SV=2 ;
Q8C0C7	Farsa		14N Only	1	Phenylalanine--tRNA ligase alpha subunit OS=Mus musculus GN=Farsa PE=2 SV=1 ;
Q8BG32	Psmd11		14N Only	1	26S proteasome non-ATPase regulatory subunit 11 OS=Mus musculus GN=Psmd11 PE=1 SV=3 ;
Q8R010	Aimp2		14N Only	1	Aminoacyl tRNA synthase complex-interacting multifunctional protein 2 OS=Mus musculus GN=Aimp2 PE=1 SV=2 ;
P33173	Kif1a		14N Only	2	Kinesin-like protein KIF1A OS=Mus musculus GN=Kif1a PE=1 SV=2 ;
P70698	Ctps1		14N Only	3	CTP synthase 1 OS=Mus musculus GN=Ctps1 PE=1 SV=2 ;
P34914	Ephx2		14N Only	2	Bifunctional epoxide hydrolase 2 OS=Mus musculus GN=Ephx2 PE=1 SV=2 ;
P63005	Pafah1b1		14N Only	1	Platelet-activating factor acetylhydrolase IB subunit alpha OS=Mus musculus GN=Pafah1b1 PE=1 SV=2 ;
Q7TMY7	Ipo8		14N Only	3	Importin-8 OS=Mus musculus GN=Ipo8 PE=1 SV=3 ;
Q8BYA0	Tbcd		14N Only	3	Tubulin-specific chaperone D OS=Mus musculus GN=Tbcd PE=2 SV=1 ;
Reverse_sp|Q6NS45|CCD66_MOUSE	Ccdc66		14N Only	1	Coiled-coil domain-containing protein 66 OS=Mus musculus GN=Ccdc66 PE=1 SV=3 ;
Q9WTX6	Cul1		14N Only	1	Cullin-1 OS=Mus musculus GN=Cul1 PE=1 SV=1 ;
Q9QUR6	Prep		14N Only	1	Prolyl endopeptidase OS=Mus musculus GN=Prep PE=2 SV=1 ;
Q61768	Kif5b		14N Only	2	Kinesin-1 heavy chain OS=Mus musculus GN=Kif5b PE=1 SV=3 ;
O88487	Dync1i2		14N Only	1	Cytoplasmic dynein 1 intermediate chain 2 OS=Mus musculus GN=Dync1i2 PE=1 SV=1 ;
Q6P1B1	Xpnpep1		14N Only	1	Xaa-Pro aminopeptidase 1 OS=Mus musculus GN=Xpnpep1 PE=2 SV=1 ;
Q9WUA2	Farsb		14N Only	1	Phenylalanine--tRNA ligase beta subunit OS=Mus musculus GN=Farsb PE=2 SV=2 ;
P50446,Q9Z331,Q922U2,Q8BGZ7	Krt6a,Krt6b,Krt5,Krt75		14N Only	3	Keratin, type II cytoskeletal 6A OS=Mus musculus GN=Krt6a PE=2 SV=3 ;Keratin, type II cytoskeletal 6B OS=Mus musculus GN=Krt6b PE=2 SV=3 ;Keratin, type II cytoskeletal 5 OS=Mus musculus GN=Krt5 PE=1 SV=1 ;Keratin, type II cytoskeletal 75 OS=Mus musculus GN=Krt75 PE=1 SV=1 ;
Q99LD4	Gps1		14N Only	1	COP9 signalosome complex subunit 1 OS=Mus musculus GN=Gps1 PE=1 SV=1 ;
P59325	Eif5		14N Only	1	Eukaryotic translation initiation factor 5 OS=Mus musculus GN=Eif5 PE=1 SV=1 ;
Q9QZR9	Col4a4		14N Only	5	Collagen alpha-4(IV) chain OS=Mus musculus GN=Col4a4 PE=2 SV=1 ;
Q64737	Gart		14N Only	1	Trifunctional purine biosynthetic protein adenosine-3 OS=Mus musculus GN=Gart PE=2 SV=3 ;
Q78PY7	Snd1		14N Only	1	Staphylococcal nuclease domain-containing protein 1 OS=Mus musculus GN=Snd1 PE=1 SV=1 ;
Q3U1J4	Ddb1		14N Only	2	DNA damage-binding protein 1 OS=Mus musculus GN=Ddb1 PE=1 SV=2 ;
Q3TTY5	Krt2		14N Only	1	Keratin, type II cytoskeletal 2 epidermal OS=Mus musculus GN=Krt2 PE=1 SV=1 ;
P24527	Lta4h		14N Only	1	Leukotriene A-4 hydrolase OS=Mus musculus GN=Lta4h PE=1 SV=4 ;
P17809	Slc2a1		14N Only	1	Solute carrier family 2, facilitated glucose transporter member 1 OS=Mus musculus GN=Slc2a1 PE=1 SV=4 ;
Q9QXK3,Q9QZE5	Copg2,Copg1		14N Only	1	Coatomer subunit gamma-2 OS=Mus musculus GN=Copg2 PE=2 SV=1 ;Coatomer subunit gamma-1 OS=Mus musculus GN=Copg1 PE=2 SV=1 ;
O08788	Dctn1		14N Only	2	Dynactin subunit 1 OS=Mus musculus GN=Dctn1 PE=1 SV=3 ;
Q6NZJ6	Eif4g1		14N Only	1	Eukaryotic translation initiation factor 4 gamma 1 OS=Mus musculus GN=Eif4g1 PE=1 SV=1 ;
P39447	Tjp1		14N Only	1	Tight junction protein ZO-1 OS=Mus musculus GN=Tjp1 PE=1 SV=2 ;
Q8BU30	Iars		14N Only	1	Isoleucine--tRNA ligase, cytoplasmic OS=Mus musculus GN=Iars PE=2 SV=2 ;
Q61879	Myh10		14N Only	1	Myosin-10 OS=Mus musculus GN=Myh10 PE=1 SV=2 ;
P70670,Q60817	Naca,Naca		14N Only	1	Nascent polypeptide-associated complex subunit alpha, muscle-specific form OS=Mus musculus GN=Naca PE=1 SV=2 ;Nascent polypeptide-associated complex subunit alpha OS=Mus musculus GN=Naca PE=1 SV=1 ;
Q9WVB6	Lenep		15N Only	1	Lens epithelial cell protein LEP503 OS=Mus musculus GN=Lenep PE=4 SV=1 ;
P62774	Mtpn		15N Only	1	Myotrophin OS=Mus musculus GN=Mtpn PE=1 SV=2 ;
P56480	Atp5b		15N Only	6	ATP synthase subunit beta, mitochondrial OS=Mus musculus GN=Atp5b PE=1 SV=2 ;
Q8QZY3	Dppa3		15N Only	1	Developmental pluripotency-associated protein 3 OS=Mus musculus GN=Dppa3 PE=1 SV=1 ;
P20443	Sag		15N Only	2	S-arrestin OS=Mus musculus GN=Sag PE=1 SV=1 ;
P16045	Lgals1		15N Only	1	Galectin-1 OS=Mus musculus GN=Lgals1 PE=1 SV=3 ;
Q9WUZ7	Sh3bgr		15N Only	1	SH3 domain-binding glutamic acid-rich protein OS=Mus musculus GN=Sh3bgr PE=2 SV=1 ;
O88569	Hnrnpa2b1		15N Only	2	Heterogeneous nuclear ribonucleoproteins A2/B1 OS=Mus musculus GN=Hnrnpa2b1 PE=1 SV=2 ;
Q9CZH7	Mxra7		15N Only	1	Matrix-remodeling-associated protein 7 OS=Mus musculus GN=Mxra7 PE=1 SV=2 ;
Q9DAW9	Cnn3		15N Only	3	Calponin-3 OS=Mus musculus GN=Cnn3 PE=1 SV=1 ;
Q8BR92	Palm2		15N Only	3	Paralemmin-2 OS=Mus musculus GN=Palm2 PE=1 SV=1 ;
Q62418	Dbnl		15N Only	3	Drebrin-like protein OS=Mus musculus GN=Dbnl PE=1 SV=2 ;
Q9D1X0	Nol3		15N Only	1	Nucleolar protein 3 OS=Mus musculus GN=Nol3 PE=1 SV=1 ;
P10852	Slc3a2		15N Only	2	4F2 cell-surface antigen heavy chain OS=Mus musculus GN=Slc3a2 PE=1 SV=1 ;
Q8CDN6	Txnl1		15N Only	1	Thioredoxin-like protein 1 OS=Mus musculus GN=Txnl1 PE=2 SV=3 ;
P53994	Rab2a		15N Only	1	Ras-related protein Rab-2A OS=Mus musculus GN=Rab2a PE=1 SV=1 ;
P49312	Hnrnpa1		15N Only	1	Heterogeneous nuclear ribonucleoprotein A1 OS=Mus musculus GN=Hnrnpa1 PE=1 SV=2 ;
Q8K0S2	Erich5		15N Only	1	Glutamate-rich protein 5
P39061	Col18a1		15N Only	7	Collagen alpha-1(XVIII) chain OS=Mus musculus GN=Col18a1 PE=1 SV=4 ;
Q03265	Atp5a1		15N Only	2	ATP synthase subunit alpha, mitochondrial OS=Mus musculus GN=Atp5a1 PE=1 SV=1 ;
Q9DBE8	Alg2		15N Only	1	Alpha-1,3/1,6-mannosyltransferase ALG2 OS=Mus musculus GN=Alg2 PE=2 SV=2 ;
O70318	Epb41l2		15N Only	2	Band 4.1-like protein 2 OS=Mus musculus GN=Epb41l2 PE=1 SV=2 ;
Q60715	P4ha1		15N Only	1	Prolyl 4-hydroxylase subunit alpha-1 OS=Mus musculus GN=P4ha1 PE=2 SV=2 ;
P54869	Hmgcs2		15N Only	1	Hydroxymethylglutaryl-CoA synthase, mitochondrial OS=Mus musculus GN=Hmgcs2 PE=1 SV=2 ;
Q9Z204	Hnrnpc		15N Only	1	Heterogeneous nuclear ribonucleoproteins C1/C2 OS=Mus musculus GN=Hnrnpc PE=1 SV=1 ;
Reverse_sp|Q3TLD5|RMP_MOUSE	Uri1		15N Only	1	Unconventional prefoldin RPB5 interactor OS=Mus musculus GN=Uri1 PE=1 SV=2 ;
Q99JY0	Hadhb		15N Only	1	Trifunctional enzyme subunit beta, mitochondrial OS=Mus musculus GN=Hadhb PE=1 SV=1 ;
Q8BGD9	Eif4b		15N Only	1	Eukaryotic translation initiation factor 4B OS=Mus musculus GN=Eif4b PE=1 SV=1 ;
P42208	Septin2		15N Only	1	Septin-2 OS=Mus musculus GN=Sept2 PE=1 SV=2 ;
P09103	P4hb		15N Only	1	Protein disulfide-isomerase OS=Mus musculus GN=P4hb PE=1 SV=2 ;
O54951	Sema6b		15N Only	1	Semaphorin-6B OS=Mus musculus GN=Sema6b PE=2 SV=1 ;
Q8K310	Matr3		15N Only	1	Matrin-3 OS=Mus musculus GN=Matr3 PE=1 SV=1 ;
Reverse_sp|Q80Y83|DIXC1_MOUSE	Dixdc1		15N Only	1	Dixin OS=Mus musculus GN=Dixdc1 PE=1 SV=1 ;
P26231	Ctnna1		15N Only	1	Catenin alpha-1 OS=Mus musculus GN=Ctnna1 PE=1 SV=1 ;
O55131	Septin7		15N Only	1	Septin-7 OS=Mus musculus GN=Sept7 PE=1 SV=1 ;
P58022	Loxl2		15N Only	1	Lysyl oxidase homolog 2 OS=Mus musculus GN=Loxl2 PE=1 SV=2 ;
Q8BMK4	Ckap4		15N Only	1	Cytoskeleton-associated protein 4 OS=Mus musculus GN=Ckap4 PE=1 SV=2 ;
Q8K1Y2	Prkd3		15N Only	1	Serine/threonine-protein kinase D3 OS=Mus musculus GN=Prkd3 PE=1 SV=1 ;
P29758	Oat		15N Only	1	Ornithine aminotransferase, mitochondrial OS=Mus musculus GN=Oat PE=1 SV=1 ;
P46935	Nedd4		15N Only	1	E3 ubiquitin-protein ligase NEDD4 OS=Mus musculus GN=Nedd4 PE=1 SV=3 ;
Q9JI33	Ntn4		15N Only	1	Netrin-4 OS=Mus musculus GN=Ntn4 PE=2 SV=2 ;
Q60668,Q9Z130	Hnrnpd,Hnrnpdl		15N Only	1	Heterogeneous nuclear ribonucleoprotein D0 OS=Mus musculus GN=Hnrnpd PE=1 SV=2 ;Heterogeneous nuclear ribonucleoprotein D-like OS=Mus musculus GN=Hnrnpdl PE=1 SV=1 ;
Q8R081	Hnrnpl		15N Only	1	Heterogeneous nuclear ribonucleoprotein L OS=Mus musculus GN=Hnrnpl PE=1 SV=2 ;
Reverse_sp|P33610|PRI2_MOUSE	Prim2		15N Only	1	DNA primase large subunit OS=Mus musculus GN=Prim2 PE=1 SV=1 ;
P27773	Pdia3		15N Only	1	Protein disulfide-isomerase A3 OS=Mus musculus GN=Pdia3 PE=1 SV=2 ;
Q04857	Col6a1		15N Only	1	Collagen alpha-1(VI) chain OS=Mus musculus GN=Col6a1 PE=2 SV=1 ;
Reverse_sp|Q80WQ9|ZBED4_MOUSE	Zbed4		15N Only	1	Zinc finger BED domain-containing protein 4 OS=Mus musculus GN=Zbed4 PE=2 SV=1 ;
Q810U4	Nrcam		15N Only	1	Neuronal cell adhesion molecule OS=Mus musculus GN=Nrcam PE=1 SV=2 ;
Q8K1H1	Tdrd7		15N Only	1	Tudor domain-containing protein 7 OS=Mus musculus GN=Tdrd7 PE=1 SV=1 ;
Q9WV92	Epb41l3		15N Only	1	Band 4.1-like protein 3 OS=Mus musculus GN=Epb41l3 PE=1 SV=1 ;
Q62417	Sorbs1		15N Only	1	Sorbin and SH3 domain-containing protein 1 OS=Mus musculus GN=Sorbs1 PE=1 SV=2 ;
Q9JHR7	Ide		15N Only	1	Insulin-degrading enzyme OS=Mus musculus GN=Ide PE=1 SV=1 ;
Q9EPX2	Papln		15N Only	1	Papilin OS=Mus musculus GN=Papln PE=2 SV=2 ;
Q02566,Q91Z83	Myh6,Myh7		15N Only	1	Myosin-6 OS=Mus musculus GN=Myh6 PE=1 SV=2 ;Myosin-7 OS=Mus musculus GN=Myh7 PE=1 SV=1 ;
Q61554	Fbn1		15N Only	1	Fibrillin-1 OS=Mus musculus GN=Fbn1 PE=1 SV=1 ;
Q61292	Lamb2		15N Only	1	Laminin subunit beta-2 OS=Mus musculus GN=Lamb2 PE=2 SV=2 ;
A2ASS6	Ttn		15N Only	1	Titin OS=Mus musculus GN=Ttn PE=1 SV=1 ;

## Sheet: Lens-Nucleus
Table S3. A complete list of lens-nucleus proteins identified by mass spectrometry
Uniprot Entry	Gene symbol	Peptide ratio(s) (14N/15N)	Composite ratio (14N/15N)	Spectra count	Protein names
Q9JJV0	Cryba4	100.0,395.47677,33.93584,160.89635,6.98268,625.12885,2666.54583,35.98804,100.0,90.4269,100.0,233.97742,100.0,100.0,100.0,14183.43561,1694.66229,	100	734	Beta-crystallin A4 OS=Mus musculus GN=Cryba4 PE=2 SV=3
P04344	Crygb	3.08329,1276.96204,240.72378,25.51342,40.71185,32.92523,100.0,100.0,100.0,66.47789,100.0,3941.71355,100.0,148.83096,86.45101,13781.36629,73.30657,4735.3086,2195.36723,140.53077,2449.40406,271.28894,100.0,100.0,100.0,45.75191,64.4884,355.53139,258.08872,6.25205,	100	1005	Gamma-crystallin B OS=Mus musculus GN=Crygb PE=2 SV=4
Q9JJV1	Cryba2	241.14847,31.23998,20.26176,83.30027,86.05445,79.19341,281.59721,2642.12631,100.0,6461.44167,336.85478,100.0,171.44028,20.23138,575.8958,21.26597,0.05911,100.0,100.0,100.0,9.65425,100.0,100.0,100.0,100.0,1957.87678,28.59733,91.40967,3472.5785,426.02211,	100	259	Beta-crystallin A2 OS=Mus musculus GN=Cryba2 PE=2 SV=3
Q9CXV3	Crygf	7.01224,675.47627,5.44626,100.0,100.0,100.0,8.30003,1219.02541,69.72663,161.93132,48.5795,68.88894,150.10066,1401.43783,377.29343,138.61864,344.6926,161.26201,132.06627,100.0,9303.31708,3382.12799,562.43613,100.0,66.96659,18323.05912,13.54631,100.0,100.0,3007.44939,2386.56279,859.63852,100.0,100.0,230.30065,370.05917,61.76607,100.0,218.60008,487.45071,0.21715,	132.066	737	Gamma-crystallin F OS=Mus musculus GN=Crygf PE=2 SV=3
P02525	Cryba1	0.11831,1143.37223,387.86571,890.89845,3694.00598,997.62661,2327.70611,609.26602,671.50929,259.25071,17.46164,5.09287,100.0,367.48302,100.0,19.87262,51.28644,14.9753,100.0,1344.1479,1347.73296,100.0,2225.56214,265.05083,	312.092	735	Beta-crystallin A1 OS=Mus musculus GN=Cryba1 PE=2 SV=2
Q9WVJ5	Crybb1	132.15244,103.7541,501.74885,385.65243,1261.64101,315.32727,100.0,1224.50657,53.70204,5.1856,294.42017,1522.66382,100.0,2910.48853,989.08929,601.38662,145.33781,113.03463,1086.29803,100.0,100.0,4024.93179,24.16803,100.0,332.40097,1450.73161,460.0257,2864.45199,22.38813,2344.1477,795.78588,24.68769,329.41532,314.12889,44.43042,39.04827,	314.728	1044	Beta-crystallin B1 OS=Mus musculus GN=Crybb1 PE=1 SV=3
P24622	Cryaa	31.75022,18.07681,34.76271,23.04417,82.72291,12.10221,80.82529,0.07011,2062.08669,100.0,20.12651,165.75326,20.47451,100.0,685.49761,848.67662,32.18033,41.57233,19.7491,206.40437,100.0,0.0023,236.0562,	41.5723	1047	Alpha-crystallin A chain OS=Mus musculus GN=Cryaa PE=2 SV=1
P04342	Crygd	20.16109,5.44626,15.97116,100.0,100.0,100.0,1689.17736,188.54117,254.21018,269.70182,13.28614,103.39745,39.3083,3061.37673,218.90879,100.0,9303.31708,3382.12799,562.43613,100.0,66.96659,1670.75007,100.0,5345.27436,654.87984,100.0,92.52908,209.52229,62.62135,17.34502,58.39663,108.78436,100.0,0.21715,	100	660	Gamma-crystallin D OS=Mus musculus GN=Crygd PE=2 SV=3
Q03740	Cryge	7.01224,675.47627,5.44626,15.97116,100.0,100.0,100.0,8.30003,1219.02541,69.72663,161.93132,48.5795,68.88894,150.10066,1401.43783,377.29343,138.61864,344.6926,161.26201,132.06627,100.0,9303.31708,3382.12799,562.43613,100.0,66.96659,100.0,100.0,3007.44939,2386.56279,859.63852,100.0,100.0,230.30065,370.05917,61.76607,100.0,218.60008,487.45071,0.21715,	114.92	739	Gamma-crystallin E OS=Mus musculus GN=Cryge PE=2 SV=4
Q61597	Crygc	3.08329,1276.96204,240.72378,25.51342,40.71185,170.68262,100.0,100.0,100.0,66.47789,100.0,3941.71355,100.0,148.83096,86.45101,13781.36629,73.30657,100.0,486.54896,908.56131,194.40127,702.55494,161.66736,530.63578,100.0,242.00608,154.35505,85.05648,157.50585,1109.05263,7488.60342,	154.355	877	Gamma-crystallin C OS=Mus musculus GN=Crygc PE=1 SV=3
Q05816	Fabp5	40.97039,4.32614,583.10573,100.0,100.0,101.09606,4453.98931,523.66696,1423.27969,100.0,255.40255,727.40682,1325.51509,504.57726,1774.35078,1887.60149,444.55596,405.00558,	473.617	102	Fatty acid-binding protein, epidermal OS=Mus musculus GN=Fabp5 PE=1 SV=3
P62696	Crybb2	11.88828,29.50771,14.78962,24.94427,24.46655,30.81291,9.47911,25.67313,18.32749,17.77952,25.6649,22.0791,138.87632,11.54736,18.66804,13.66341,15.75996,46.51197,92.16303,0.17264,99.73328,37.3895,23.27151,27.12132,29.84814,40.35107,21.95984,21.94406,0.08895,	23.2715	153	Beta-crystallin B2 OS=Mus musculus GN=Crybb2 PE=1 SV=2
P23927	Cryab	3.87082,13.36562,11.7177,11.10534,59.79823,62.68055,61.12646,24.83521,14.4506,6.39273,235.1035,530.41037,74.7594,33.88414,100.0,134.26463,71.86133,59.19142,59.19142,196.87936,170.00112,29.00071,100.0,100.0,	60.4587	633	Alpha-crystallin B chain OS=Mus musculus GN=Cryab PE=1 SV=2
P04345	Cryga	174.17339,40.71185,5.44626,15.97116,632.51432,100.0,729.991,24.85706,581.01704,110.34136,55.53137,616.25209,1207.16769,972.93215,277.9615,9303.31708,110.76449,562.43613,1060.28106,1153.1153,708.61652,1126.66278,84.86093,1185.50182,102.03781,157.50585,69.41525,100.0,100.0,	174.173	650	Gamma-crystallin A OS=Mus musculus GN=Cryga PE=2 SV=2
Q9JJU9	Crybb3	720.53381,218.47923,340.07674,829.35109,4217.86197,783.85488,11051.06521,234.76313,131.54733,41.67701,0.02865,134.11474,14.13496,219.0498,11.76945,205.13449,100.0,0.16261,100.0,379.20438,100.0,22.29119,	165.866	528	Beta-crystallin B3 OS=Mus musculus GN=Crybb3 PE=2 SV=3
O35486	Crygs	137.84104,84.77779,85.12922,156.76285,4.018,28.45724,63.0909,100.0,35.14148,171.83234,1101.87396,3216.60685,224.86074,63.81844,827.56141,272.04106,146.30468,	137.841	192	Beta-crystallin S OS=Mus musculus GN=Crygs PE=1 SV=3
Q61598	Gdi2	57.20199,532.59729,100.0,2570.87956,204.5197,6.79058,100.0,10.60474,76.40759,738.76297,107.1107,487.30206,100.0,85.18003,255.61708,107.76826,11.29269,100.0,	100	73	Rab GDP dissociation inhibitor beta OS=Mus musculus GN=Gdi2 PE=1 SV=1
Q9R0P9	Uchl1	236.20754,299.72857,115.54243,100.0,1260.01833,39.95218,	165.203	37	Ubiquitin carboxyl-terminal hydrolase isozyme L1 OS=Mus musculus GN=Uchl1 PE=1 SV=1
P16858	Gapdh	44.34306,248.05776,88.84169,100.0,875.11505,100.0,366.81914,1050.93335,104.20451,156.54163,59.16733,100.0,1919.7268,100.0,542.12158,3998.7838,459.82577,76.12385,666.35462,370.61728,	197.057	149	Glyceraldehyde-3-phosphate dehydrogenase OS=Mus musculus GN=Gapdh PE=1 SV=2
P52480	Pkm	33.06913,1507.4516,100.0,1171.60841,1164.91084,100.0,100.0,38.27568,112.25259,308.75582,293.30461,131.04413,94.44355,244.13668,146.98617,6.60021,40.36176,1060.17108,34.66021,100.0,100.0,14.89243,	100	144	Pyruvate kinase PKM OS=Mus musculus GN=Pkm PE=1 SV=4
Q9DCL9	Paics	284.00405,963.13473,43.18728,204.26131,100.0,18.55072,361.82972,100.0,100.0,5.36896,560.82689,953.23301,100.0,4748.6157,1438.18538,43.32186,100.0,65.58279,35.93133,100.0,	100	60	Multifunctional protein ADE2 OS=Mus musculus GN=Paics PE=1 SV=4
Q6NVD9	Bfsp2	11.90359,352.07809,203.00714,100.0,3663.46825,8596.79748,100.0,1646.12345,1844.95744,233.56024,5.09683,315.35382,526.17289,347.99229,118.31725,77.01361,15.25029,100.0,426.05731,1251.49231,138.36068,1040.58625,533.62777,45.96231,100.0,496.49157,	271.393	106	Phakinin OS=Mus musculus GN=Bfsp2 PE=1 SV=1
P17182	Eno1	1.23671,13.47497,5.50382,245301.79296,428.95344,100.0,47.76857,8.63904,2238.38906,102.50727,384991.42783,42.38653,11.16754,659.25717,100.0,133.05946,1482.81771,199.61663,16.18088,596.27957,	101.246	122	Alpha-enolase OS=Mus musculus GN=Eno1 PE=1 SV=3
P99024	Tubb5	0.23325,91.26888,4.35714,13.50935,53.22326,0.17749,9.8827,100.0,0.0539,0.00857,1136.28342,113.70478,966.71014,0.2128,6.58802,	9.8827	60	Tubulin beta-5 chain OS=Mus musculus GN=Tubb5 PE=1 SV=1
P68369	Tuba1a	3131.83699,0.02334,100.0,47.80624,100.0,6304.00561,100.0,203.03217,144.47463,100.0,100.0,155.32543,676.97219,47.70459,	100	99	Tubulin alpha-1A chain OS=Mus musculus GN=Tuba1a PE=1 SV=1
P05213	Tuba1b	3131.83699,0.02334,100.0,47.80624,100.0,6304.00561,675.10895,203.03217,144.47463,29.39766,100.0,155.32543,676.97219,47.70459,	120.198	89	Tubulin alpha-1B chain OS=Mus musculus GN=Tuba1b PE=1 SV=2
Q8BKC5	Ipo5	30.25227,17.32715,1148.45116,100.0,100.0,25.44981,4.87294,299.64062,234.23814,100.0,118.63156,24.74892,414.10255,1728.49648,95.10136,94.78873,100.0,51.48486,1147.35741,116.97459,974.5227,100.0,12.81463,344.53212,100.0,250.91718,2045.70725,100.0,100.0,100.0,54.24464,213.39052,100.0,88.57097,13.87573,100.0,5.03626,82.79698,	100	140	Importin-5 OS=Mus musculus GN=Ipo5 PE=1 SV=3
P68040	Gnb2l1	93.36568,162.63142,7.25113,442.83858,63.99706,0.11088,416.98586,100.0,390.68491,125.63147,	112.085	31	Guanine nucleotide-binding protein subunit beta-2-like 1 OS=Mus musculus GN=Gnb2l1 PE=1 SV=3
P14602	Hspb1	16.05872,3.19899,	7.1674	36	Heat shock protein beta-1 OS=Mus musculus GN=Hspb1 PE=1 SV=3
Q01768	Nme2	100.0,98.78663,321.27187,100.0,100.0,	100	21	Nucleoside diphosphate kinase B OS=Mus musculus GN=Nme2 PE=1 SV=1
P09411	Pgk1	57.67035,82.07882,100.0,100.0,6.13644,28.12671,476.58278,303.17653,100.0,5.11732,2181.81163,129.18343,1862.7275,	100	48	Phosphoglycerate kinase 1 OS=Mus musculus GN=Pgk1 PE=1 SV=4
Q9Z0S1	Bpnt1	4.00874,100.0,254.3956,25.57195,237.92125,34.0341,100.0,100.0,	100	23	3'(2'),5'-bisphosphate nucleotidase 1 OS=Mus musculus GN=Bpnt1 PE=1 SV=2
P68373	Tuba1c	3131.83699,0.02334,100.0,47.80624,100.0,6304.00561,675.10895,144.47463,100.0,100.0,155.32543,676.97219,47.70459,	100	89	Tubulin alpha-1C chain OS=Mus musculus GN=Tuba1c PE=1 SV=1
P63017	Hspa8	0.72029,850.92907,35265.65194,13.94887,100.0,635.15944,100.0,4.27891,1426.61798,100.0,911.76147,1442.76818,1227.44605,100.0,100.0,28.83672,100.0,100.0,425.59442,241.48791,324.10909,1218.09426,0.0331,	100	100	Heat shock cognate 71 kDa protein OS=Mus musculus GN=Hspa8 PE=1 SV=1
P68372	Tubb4b	91.26888,4.35714,13.50935,53.22326,0.17749,9.8827,100.0,0.0539,0.00857,1136.28342,113.70478,966.71014,6.58802,	13.5093	54	Tubulin beta-4B chain OS=Mus musculus GN=Tubb4b PE=1 SV=1
P51410	Rpl9	19.47203,48.36278,22.44072,	22.4407	13	60S ribosomal protein L9 OS=Mus musculus GN=Rpl9 PE=1 SV=2
P06151	Ldha	8.66841,46.70276,100.0,100.0,8.53475,641.83738,	68.3394	23	L-lactate dehydrogenase A chain OS=Mus musculus GN=Ldha PE=1 SV=3
Q8VHL5	Crygn	49.61062,1469.44912,179.15507,555.89853,17280.78185,3880.39007,1023.56047,100.0,	754.318	93	Gamma-crystallin N OS=Mus musculus GN=Crygn PE=1 SV=2
P63260,P60710	Actb,Actg1	13.99233,13.99233,823.10107,6215.99964,100.0,100.0,7.54649,25.30705,11.96745,232.57875,559.65947,420.34659,4.95703,196.26731,341.90575,107.83727,2075.56179,191.00412,	143.518	142	Actin, cytoplasmic 2 OS=Mus musculus GN=Actg1 PE=1 SV=1 @Actin, cytoplasmic 1 OS=Mus musculus GN=Actb PE=1 SV=1
P84078	Arf1	51.63229,308.46779,100.0,100.0,	100	17	ADP-ribosylation factor 1 OS=Mus musculus GN=Arf1 PE=1 SV=2
P70296	Pebp1	4.89,100.0,100.0,	100	11	Phosphatidylethanolamine-binding protein 1 OS=Mus musculus GN=Pebp1 PE=1 SV=3
P51855	Gss	5.20806,1735.13374,793.32109,100.0,100.0,251.67082,363.28611,100.0,100.0,155.83363,971.45003,178.72044,7.85244,27.18389,316.6609,	155.834	46	Glutathione synthetase OS=Mus musculus GN=Gss PE=2 SV=1
P19157	Gstp1	61.95777,189.56316,100.0,169.12845,466.81156,1465.47197,100.0,100.0,651.16736,100.0,228.64605,	169.128	37	Glutathione S-transferase P 1 OS=Mus musculus GN=Gstp1 PE=1 SV=2
Q9CWF2	Tubb2b	0.23325,91.26888,13.50935,53.22326,0.17749,9.8827,100.0,0.0539,0.00857,1136.28342,15.1088,1382.5047,113.70478,966.71014,6.58802,	15.1088	46	Tubulin beta-2B chain OS=Mus musculus GN=Tubb2b PE=1 SV=1
P16460	Ass1	6.08568,748.68675,33.07423,193.98749,18.54197,	33.0742	58	Argininosuccinate synthase OS=Mus musculus GN=Ass1 PE=1 SV=1
Q61171	Prdx2	181.73945,4.45357,5.76459,100.0,155.44271,	100	17	Peroxiredoxin-2 OS=Mus musculus GN=Prdx2 PE=1 SV=3
Q9DCJ9	Npl	181.31977,100.0,88.68304,213.23504,204.5486,100.0,8.40691,1358.94146,106.09312,	106.093	37	N-acetylneuraminate lyase OS=Mus musculus GN=Npl PE=1 SV=1
Q9D1U0	Grifin	3.70395,	3.70395	10	Grifin OS=Mus musculus GN=Grifin PE=2 SV=1
P16546	Sptan1	235.81393,15.67624,3.07064,3.798,716.39322,2.04979,0.02654,21.37921,55.72411,886.3098,6.95839,159.67254,136.37231,95.76143,79.92911,38.35473,125.64436,100.0,369.46852,10.88994,100.0,100.0,100.0,100.0,276.28844,119.80115,15.60755,290.67239,1762.30017,100.0,144.96019,908.84016,353.19813,181.26717,7.83448,100.0,250.08408,57.30825,100.0,456.35664,209.88505,100.0,32.05047,96.74725,100.0,66.60096,198.9…	100	235	Spectrin alpha chain, non-erythrocytic 1 OS=Mus musculus GN=Sptan1 PE=1 SV=4
P17742	Ppia	11.97958,100.0,26.59653,21.0511,6.12895,73.92518,	23.6619	12	Peptidyl-prolyl cis-trans isomerase A OS=Mus musculus GN=Ppia PE=1 SV=2
P58252	Eef2	37.64359,69.144,7.84308,33.66096,1159.10632,100.0,100.0,100.0,100.0,425.95316,100.0,174.74756,100.0,336.18817,100.0,100.0,77.07591,32.47395,37.77616,100.0,264.245,100.0,13.42613,227.33208,377.03641,513.33801,11.85159,678.01523,	100	110	Elongation factor 2 OS=Mus musculus GN=Eef2 PE=1 SV=2
P24549	Aldh1a1	233.40275,53.40692,239.28089,64.88472,316.00827,25.40327,8.91889,266.19097,498.96869,124.20418,100.0,0.09518,	111.447	87	Retinal dehydrogenase 1 OS=Mus musculus GN=Aldh1a1 PE=1 SV=5
Q99LX0	Park7	414.15366,175.08311,846.33386,44.37924,143.00636,	175.083	10	Protein DJ-1 OS=Mus musculus GN=Park7 PE=1 SV=1
P80314	Cct2	680.35903,100.0,17.70718,28.71712,45.10168,19.92243,19.33499,211.60414,27.27953,73.62274,100.0,335.83921,100.0,67.87439,	70.6902	40	T-complex protein 1 subunit beta OS=Mus musculus GN=Cct2 PE=1 SV=4
Q9QUI0	Rhoa	257.87049,12.48872,25.44584,91.6203,	48.2841	12	Transforming protein RhoA OS=Mus musculus GN=Rhoa PE=1 SV=1
P13020	Gsn	657.5086,1845.93616,258.10317,11.84861,196.29606,100.0,449.43473,0.08494,541.16394,22.65083,102.64631,100.0,100.0,0.02061,13.46815,135.38622,86.11539,411.12446,200.07259,100.0,61.18086,	100	97	Gelsolin OS=Mus musculus GN=Gsn PE=1 SV=3
P60843	Eif4a1	100.0,57.12201,93.1449,72.67559,39.44015,100.0,100.0,8.91679,100.0,100.0,100.0,61.78373,295.1346,	100	33	Eukaryotic initiation factor 4A-I OS=Mus musculus GN=Eif4a1 PE=1 SV=1
Q7TMM9	Tubb2a	0.23325,91.26888,0.17749,9.8827,100.0,0.0539,0.00857,1136.28342,15.1088,1382.5047,113.70478,966.71014,6.58802,	15.1088	45	Tubulin beta-2A chain OS=Mus musculus GN=Tubb2a PE=1 SV=1
Q01853	Vcp	2.2001,56.31953,8.50371,100.0,211.59325,351.0093,419.30508,689.90831,6.02488,13.20088,950.98189,33.07539,6.82709,162.2151,34.62148,1631.14845,100.0,4.28264,100.0,	100	60	Transitional endoplasmic reticulum ATPase OS=Mus musculus GN=Vcp PE=1 SV=4
P11983	Tcp1	15.71674,119.22076,536.01829,22.61704,267.39768,100.0,100.0,100.0,97.57371,48.00413,143.13775,12.52651,8.84441,100.0,867.66045,	100	46	T-complex protein 1 subunit alpha OS=Mus musculus GN=Tcp1 PE=1 SV=3
P14206	Rpsa	1.6268,113.33654,24.05023,2245.30286,2075.39529,940.56259,115.31199,	115.312	19	40S ribosomal protein SA OS=Mus musculus GN=Rpsa PE=1 SV=4
P28474	Adh5	82.11815,14.48172,0.10874,0.23889,100.0,100.8245,21.24788,	21.2479	21	Alcohol dehydrogenase class-3 OS=Mus musculus GN=Adh5 PE=1 SV=3
P40142	Tkt	13.3348,64.91485,29.26689,79.47246,28.30214,100.0,244.91378,54.96601,100.0,1077.63799,	71.8258	34	Transketolase OS=Mus musculus GN=Tkt PE=1 SV=1
Q9D7X8	Ggct	0.00435,134.93694,71.25798,100.0,543.44305,	100	9	Gamma-glutamylcyclotransferase OS=Mus musculus GN=Ggct PE=1 SV=1
P80313	Cct7	182.50857,18.13639,21.8921,145.34532,12.28893,100.0,100.0,706.83499,100.0,9953.93787,100.20162,43.6827,100.0,694.35238,449.03741,18.23859,75.0994,34.10895,85.59183,	100	35	T-complex protein 1 subunit eta OS=Mus musculus GN=Cct7 PE=1 SV=1
P35979	Rpl12	0.0566,734.00525,100.0,	100	10	60S ribosomal protein L12 OS=Mus musculus GN=Rpl12 PE=1 SV=2
Q62261	Sptbn1	42.18685,100.0,100.0,147.16656,12.95086,28.371,87.74149,190.10074,100.0,100.0,100.0,12.15169,80.55678,28.89864,0.03265,7.72599,184.75694,119.0727,100.0,0.05047,681.08845,115.55759,230.53471,4.16682,100.0,8.60262,4.06182,12.62048,186.11095,100.0,7.08489,100.0,37.61983,100.0,0.05378,10.24275,19.11678,142.38458,909.41903,100.0,180.06935,100.0,72.17904,16.98222,263.48783,100.0,17.18835,	100	131	Spectrin beta chain, non-erythrocytic 1 OS=Mus musculus GN=Sptbn1 PE=1 SV=2
P62259	Ywhae	253.34171,287.11159,100.0,76.45847,5.96311,143.94194,183.9044,	143.942	24	14-3-3 protein epsilon OS=Mus musculus GN=Ywhae PE=1 SV=1
P63101	Ywhaz	59.60545,19346.86378,2005.38583,58.23881,4432.31743,52.85587,67.40698,19.66107,191.73629,100.0,4.97562,132.34518,	82.1017	32	14-3-3 protein zeta/delta OS=Mus musculus GN=Ywhaz PE=1 SV=1
P80315	Cct4	0.80815,100.0,18.96998,8.37471,13.29484,100.0,7.00776,45.68183,100.0,100.0,202.49268,5.208,10.64897,14.73291,	16.7177	27	T-complex protein 1 subunit delta OS=Mus musculus GN=Cct4 PE=1 SV=3
Q9DBJ1	Pgam1	100.0,100.0,7.10747,100.0,16.50517,474.88877,2492.77671,	100	20	Phosphoglycerate mutase 1 OS=Mus musculus GN=Pgam1 PE=1 SV=3
Q64691	Capn3	5.84306,432.62797,64.51273,2810.11038,249770.77632,100.0,100.0,87.42358,2083.57043,85.79196,100.0,66.29186,18.09072,100.0,240.06275,78.86837,806.76218,100.0,2762.15855,58.09801,778.37926,100.0,	100	100	Calpain-3 OS=Mus musculus GN=Capn3 PE=2 SV=2
O09061	Psmb1	25.98243,113.53836,100.0,100.0,8934.81037,	100	21	Proteasome subunit beta type-1 OS=Mus musculus GN=Psmb1 PE=1 SV=1
P35700	Prdx1	500.64371,100.0,33.38574,	100	8	Peroxiredoxin-1 OS=Mus musculus GN=Prdx1 PE=1 SV=1
Q9WUB3	Pygm	1.04376,91.61307,19.08321,204.30112,79.86944,100.0,100.0,100.0,663.37474,130.17898,72.12407,18.34733,375.86466,34.7554,100.0,100.0,2022.85102,317.00408,324.24233,248.78944,	100	55	Glycogen phosphorylase, muscle form OS=Mus musculus GN=Pygm PE=1 SV=3
Q3ULJ0	Gpd1l	16.01418,100.0,363.65776,100.0,5.52097,100.0,100.0,6.29112,	100	18	Glycerol-3-phosphate dehydrogenase 1-like protein OS=Mus musculus GN=Gpd1l PE=1 SV=2
P48774	Gstm5	41.04398,11.61424,71.97557,224.36678,	54.3522	11	Glutathione S-transferase Mu 5 OS=Mus musculus GN=Gstm5 PE=1 SV=1
P70168	Kpnb1	13.13493,56.90527,3873.94747,100.0,383000.00182,69.56259,58.86999,100.0,0.04488,100.0,12.84411,11.22864,100.0,13.1923,6.30977,29.33602,	57.8793	43	Importin subunit beta-1 OS=Mus musculus GN=Kpnb1 PE=1 SV=2
Q04447	Ckb	94.54912,100.0,31.86365,17.44166,0.17327,476.53707,	54.8879	29	Creatine kinase B-type OS=Mus musculus GN=Ckb PE=1 SV=1
O55234	Psmb5	100.0,100.0,103.73943,124.86885,27.07057,198.58154,	101.853	15	Proteasome subunit beta type-5 OS=Mus musculus GN=Psmb5 PE=1 SV=3
P68510	Ywhah	0.06811,60.28216,12.22512,37.17786,	21.3191	16	14-3-3 protein eta OS=Mus musculus GN=Ywhah PE=1 SV=2
Q9Z2U1	Psma5	716.66111,7.56978,100.0,	100	11	Proteasome subunit alpha type-5 OS=Mus musculus GN=Psma5 PE=1 SV=1
P08030	Aprt	70.16655,157.93007,115.13785,21.76839,100.0,	100	6	Adenine phosphoribosyltransferase OS=Mus musculus GN=Aprt PE=1 SV=2
Q9R1P0	Psma4	20.15554,25.17894,76.56498,5.42366,0.02994,0.08206,1356.23108,	20.1555	20	Proteasome subunit alpha type-4 OS=Mus musculus GN=Psma4 PE=1 SV=1
Q9CQ65	Mtap	57.6246,0.03076,15.21915,	15.2192	10	S-methyl-5'-thioadenosine phosphorylase OS=Mus musculus GN=Mtap PE=1 SV=1
Q9DBF1	Aldh7a1	100.0,100.0,1772.88755,100.0,49.52823,	100	27	Alpha-aminoadipic semialdehyde dehydrogenase OS=Mus musculus GN=Aldh7a1 PE=1 SV=4
P80316	Cct5	19.11803,123265.98674,87.07586,25.36465,16.97817,5.09753,5.35507,3109.8204,100.0,	25.3647	31	T-complex protein 1 subunit epsilon OS=Mus musculus GN=Cct5 PE=1 SV=1
P11499	Hsp90ab1	9.29806,0.09161,203.78749,2462.71641,100.0,140.02737,4.90733,98.69913,523.101,165.7852,1258.73836,100.0,45.16922,2109.66021,947.7817,32.07514,598.69454,52.58729,40.66692,979.65636,20.82076,	100	65	Heat shock protein HSP 90-beta OS=Mus musculus GN=Hsp90ab1 PE=1 SV=3
Q9Z0N1	Eif2s3x	0.7084,100.0,265.96238,100.0,100.0,79.13971,93.07605,100.0,	100	18	Eukaryotic translation initiation factor 2 subunit 3, X-linked OS=Mus musculus GN=Eif2s3x PE=1 SV=2
P05063	Aldoc	31.07055,100.0,100.0,24.54856,26.19208,190.78172,100.0,100.0,57.69748,	100	24	Fructose-bisphosphate aldolase C OS=Mus musculus GN=Aldoc PE=1 SV=4
P10126	Eef1a1	68.36945,100.0,0.02311,186.35944,292.44716,100.0,100.0,2171.66183,256.38601,148.37953,100.0,7.55507,	100	54	Elongation factor 1-alpha 1 OS=Mus musculus GN=Eef1a1 PE=1 SV=3
Q9D8N0	Eef1g	100.0,100.0,1891.17622,42.08245,700.08758,261.79814,33.66571,9.85648,13.84546,13.91688,	64.871	34	Elongation factor 1-gamma OS=Mus musculus GN=Eef1g PE=1 SV=3
P11352	Gpx1	100.0,100.0,100.0,	100	10	Glutathione peroxidase 1 OS=Mus musculus GN=Gpx1 PE=1 SV=2
P62827	Ran	329.33572,100.0,5.95403,	100	10	GTP-binding nuclear protein Ran OS=Mus musculus GN=Ran PE=1 SV=3
Q9DCD0	Pgd	100.0,223.93103,47.65126,22.60415,51.09004,30.96446,0.02052,	47.6513	21	6-phosphogluconate dehydrogenase, decarboxylating OS=Mus musculus GN=Pgd PE=1 SV=3
P21550	Eno3	5.50382,100.0,47.76857,16.18088,596.27957,	47.7686	35	Beta-enolase OS=Mus musculus GN=Eno3 PE=1 SV=3
Q921M7	Fam49b	64.33732,100.0,78073.27075,148.02113,76.59116,23.7604,	87.5164	10	Protein FAM49B OS=Mus musculus GN=Fam49b PE=2 SV=1
P10630	Eif4a2	100.0,100.0,100.0,100.0,100.0,100.0,61.78373,295.1346,	100	23	Eukaryotic initiation factor 4A-II OS=Mus musculus GN=Eif4a2 PE=2 SV=2
P61982	Ywhag	6.838,160.66014,73.28441,16.49714,127.02291,173.07956,	96.4821	14	14-3-3 protein gamma OS=Mus musculus GN=Ywhag PE=1 SV=2
P06745	Gpi	100.0,290.7488,101.64833,57.47178,754.23898,125.76199,100.0,	101.648	27	Glucose-6-phosphate isomerase OS=Mus musculus GN=Gpi PE=1 SV=4
P80318	Cct3	11.69516,14196.96703,100.0,100.0,100.0,121.04993,9.08209,1380.85745,	100	23	T-complex protein 1 subunit gamma OS=Mus musculus GN=Cct3 PE=1 SV=1
Q68FD5	Cltc	0.7365,12.28927,35.14844,6.65433,1232.02485,0.08651,1030.31884,121.4644,100.0,100.0,14.59699,6.20823,78.84756,4.83942,178.73756,9.75389,0.00668,100.0,10.84446,100.0,177.05963,100.0,35.40141,100.0,5.52166,	35.4014	77	Clathrin heavy chain 1 OS=Mus musculus GN=Cltc PE=1 SV=3
A2AMT1	Bfsp1	7.72672,8.2096,6081.49368,134.80154,5904.24547,873.05115,30.69348,413.75572,100.0,1364.65439,399.80532,264.48028,395.70785,374.66442,100.0,655.47517,1426.05215,177.40976,13.16654,100.0,111.19799,100.0,6.20647,	177.41	107	Filensin OS=Mus musculus GN=Bfsp1 PE=2 SV=1
P15532	Nme1	100.0,321.27187,100.0,	100	6	Nucleoside diphosphate kinase A OS=Mus musculus GN=Nme1 PE=1 SV=1
P42932	Cct8	0.46315,126.16686,100.0,899.03311,100.0,100.0,298.4913,42.18572,	100	16	T-complex protein 1 subunit theta OS=Mus musculus GN=Cct8 PE=1 SV=3
P62908	Rps3	50.94588,177.90306,775.24069,77.01558,	117.053	16	40S ribosomal protein S3 OS=Mus musculus GN=Rps3 PE=1 SV=1
P17751	Tpi1	100.0,38.56363,8.55077,7.81453,	18.159	11	Triosephosphate isomerase OS=Mus musculus GN=Tpi1 PE=1 SV=4
Q9CWJ9	Atic	8.36662,100.0,100.0,100.0,100.0,35.03868,	100	25	Bifunctional purine biosynthesis protein PURH OS=Mus musculus GN=Atic PE=1 SV=2
O70250	Pgam2	1210.32332,11.12305,118.71397,100.0,100.0,2492.77671,	108.956	29	Phosphoglycerate mutase 2 OS=Mus musculus GN=Pgam2 PE=1 SV=3
Q9R0P3	Esd	37.12663,17.52311,53.18752,229.13304,	44.4373	14	S-formylglutathione hydrolase OS=Mus musculus GN=Esd PE=1 SV=1
Q8CIX8	Lgsn	2.84009,92.82196,38.1832,100.0,31.21183,	38.1832	21	Lengsin OS=Mus musculus GN=Lgsn PE=1 SV=1
P70195	Psmb7	144.34523,5.58003,100.0,	100	6	Proteasome subunit beta type-7 OS=Mus musculus GN=Psmb7 PE=1 SV=1
P49722	Psma2	100.0,133.34782,100.0,60.31521,254.55118,	100	20	Proteasome subunit alpha type-2 OS=Mus musculus GN=Psma2 PE=1 SV=3
P47962	Rpl5	7.80079,147.00268,173.89596,1452.04238,94.43039,100.0,100.0,7.85996,	100	12	60S ribosomal protein L5 OS=Mus musculus GN=Rpl5 PE=1 SV=3
P05064	Aldoa	2.8876,97.08032,100.0,33.66726,38.66059,57.69748,	47.2294	17	Fructose-bisphosphate aldolase A OS=Mus musculus GN=Aldoa PE=1 SV=2
Q9QUM9	Psma6	82.93687,100.0,978.82741,	100	14	Proteasome subunit alpha type-6 OS=Mus musculus GN=Psma6 PE=1 SV=1
P68254	Ywhaq	41.27574,6.78496,43.34043,62.95686,6.67506,	41.2757	10	14-3-3 protein theta OS=Mus musculus GN=Ywhaq PE=1 SV=1
O08553	Dpysl2	26.48515,0.07314,0.03293,77.18385,100.0,411.06206,100.0,	77.1839	30	Dihydropyrimidinase-related protein 2 OS=Mus musculus GN=Dpysl2 PE=1 SV=2
P14148	Rpl7	1.00065,61.02043,1356.40907,601.12527,1371.12284,100.0,	245.179	18	60S ribosomal protein L7 OS=Mus musculus GN=Rpl7 PE=1 SV=2
Q99KC8	Vwa5a	100.0,100.0,87.1191,48.89452,100.0,338.10108,118.98803,100.0,100.0,	100	22	von Willebrand factor A domain-containing protein 5A OS=Mus musculus GN=Vwa5a PE=1 SV=2
P14152	Mdh1	161.17213,34.8776,164.46731,25.50437,156.11102,9.71627,14.68474,10.22348,188.27542,	34.8776	15	Malate dehydrogenase, cytoplasmic OS=Mus musculus GN=Mdh1 PE=1 SV=3
P61164	Actr1a	37.50495,57.62653,100.0,725.74156,7.77882,	57.6265	22	Alpha-centractin OS=Mus musculus GN=Actr1a PE=2 SV=1
Q922R8	Pdia6	100.0,392.83877,192.43023,100.0,59.58736,	100	22	Protein disulfide-isomerase A6 OS=Mus musculus GN=Pdia6 PE=1 SV=3
Q9CQI6	Cotl1	36.38727,	36.3873	10	Coactosin-like protein OS=Mus musculus GN=Cotl1 PE=1 SV=3
Q9ERD7	Tubb3	0.23325,91.26888,100.0,0.0539,0.00857,53.33648,6.58802,	6.58802	29	Tubulin beta-3 chain OS=Mus musculus GN=Tubb3 PE=1 SV=1
P26516	Psmd7	29.62703,72.7479,135.79191,100.0,	85.2924	7	26S proteasome non-ATPase regulatory subunit 7 OS=Mus musculus GN=Psmd7 PE=1 SV=2
Q7TQI3	Otub1	100.0,548.19164,0.10422,22.79124,432.87991,	100	11	Ubiquitin thioesterase OTUB1 OS=Mus musculus GN=Otub1 PE=1 SV=2
Q922F4	Tubb6	91.26888,13.50935,53.22326,100.0,0.0539,0.00857,	26.8144	26	Tubulin beta-6 chain OS=Mus musculus GN=Tubb6 PE=1 SV=1
Q78ZA7	Nap1l4	100.0,63.39783,27.09373,100.0,	79.6227	14	Nucleosome assembly protein 1-like 4 OS=Mus musculus GN=Nap1l4 PE=1 SV=1
P07901	Hsp90aa1	0.09161,2462.71641,100.0,140.02737,100.0,24.24808,165.7852,1258.73836,229.66564,27.17718,63.03737,251.00376,100.0,	100	45	Heat shock protein HSP 90-alpha OS=Mus musculus GN=Hsp90aa1 PE=1 SV=4
P12382	Pfkl	102.92878,30.8271,137.35131,4.75032,100.0,100.0,0.01131,100.0,	100	20	6-phosphofructokinase, liver type OS=Mus musculus GN=Pfkl PE=1 SV=4
P63001	Rac1	44.14746,100.0,225.36566,35.67577,	66.4436	8	Ras-related C3 botulinum toxin substrate 1 OS=Mus musculus GN=Rac1 PE=1 SV=1
Q8QZY1	Eif3l	100.0,31.7896,101.88832,47.84321,27347.17997,21.82407,55.22037,	55.2204	20	Eukaryotic translation initiation factor 3 subunit L OS=Mus musculus GN=Eif3l PE=1 SV=1
Q9DBZ5	Eif3k	9.66598,15.55337,100.0,235.07403,	39.4378	4	Eukaryotic translation initiation factor 3 subunit K OS=Mus musculus GN=Eif3k PE=1 SV=1
P62301	Rps13	148.27652,100.0,268.71973,100.0,	121.769	4	40S ribosomal protein S13 OS=Mus musculus GN=Rps13 PE=1 SV=2
Q8K1M6	Dnm1l	4.44303,11.38084,27.05162,51.87775,	17.5462	21	Dynamin-1-like protein OS=Mus musculus GN=Dnm1l PE=1 SV=2
Q8BZF8	Pgm5	3.76982,38.45782,24.54927,505.8166,	30.7264	15	Phosphoglucomutase-like protein 5 OS=Mus musculus GN=Pgm5 PE=1 SV=2
P10107	Anxa1	100.0,99.19789,38.29249,21.11193,40.77909,100.0,0.00918,	40.7791	9	Annexin A1 OS=Mus musculus GN=Anxa1 PE=1 SV=2
Q8R5C5	Actr1b	100.0,725.74156,7.77882,	100	15	Beta-centractin OS=Mus musculus GN=Actr1b PE=1 SV=1
P80317	Cct6a	2.69775,7.84778,1100.50448,11.38756,121.70235,100.0,129.51857,101.0984,516.57369,45174.21632,	110.923	25	T-complex protein 1 subunit zeta OS=Mus musculus GN=Cct6a PE=1 SV=3
P14869	Rplp0	4.34417,1677.07917,584.34622,17446.25697,736.58818,	736.588	9	60S acidic ribosomal protein P0 OS=Mus musculus GN=Rplp0 PE=1 SV=3
P62874	Gnb1	8.74314,44.51741,355.25635,11.39203,51.61053,	44.5174	8	Guanine nucleotide-binding protein G(I)/G(S)/G(T) subunit beta-1 OS=Mus musculus GN=Gnb1 PE=1 SV=3
P50396	Gdi1	0.02477,5.24997,8.9449,85.18003,255.61708,107.76826,	27.603	14	Rab GDP dissociation inhibitor alpha OS=Mus musculus GN=Gdi1 PE=1 SV=3
Q9CPY7	Lap3	105.29911,528.09809,20.46075,0.04736,100.0,11.74889,	45.2336	13	Cytosol aminopeptidase OS=Mus musculus GN=Lap3 PE=1 SV=3
Q99JI4	Psmd6	36.41507,100.0,100.0,34.30769,	60.3449	8	26S proteasome non-ATPase regulatory subunit 6 OS=Mus musculus GN=Psmd6 PE=1 SV=1
Q6ZWX6	Eif2s1	63.13362,681.3478,100.0,	100	8	Eukaryotic translation initiation factor 2 subunit 1 OS=Mus musculus GN=Eif2s1 PE=1 SV=3
Q920E5	Fdps	38.61398,	38.614	12	Farnesyl pyrophosphate synthase OS=Mus musculus GN=Fdps PE=1 SV=1
O08709	Prdx6	60.42339,	60.4234	5	Peroxiredoxin-6 OS=Mus musculus GN=Prdx6 PE=1 SV=3
Q9D0I9	Rars	9.15157,491.46498,38.77102,100.0,	62.2664	24	Arginine--tRNA ligase, cytoplasmic OS=Mus musculus GN=Rars PE=2 SV=2
P84228	Hist1h3b	2.36653,3.25112,	2.77378	3	Histone H3.2 OS=Mus musculus GN=Hist1h3b PE=1 SV=2
Q8R016	Blmh	113.04232,1359.685,4.06052,	113.042	9	Bleomycin hydrolase OS=Mus musculus GN=Blmh PE=1 SV=1
Q9JLR9	Higd1a	16.85638,	16.8564	1	HIG1 domain family member 1A, mitochondrial OS=Mus musculus GN=Higd1a PE=2 SV=1
O35945	Aldh1a7	53.40692,239.28089,64.88472,316.00827,124.20418,0.09518,	89.7717	31	Aldehyde dehydrogenase, cytosolic 1 OS=Mus musculus GN=Aldh1a7 PE=2 SV=1
P26638	Sars	100.0,823.59171,100.0,334.65017,32.06151,	100	24	Serine--tRNA ligase, cytoplasmic OS=Mus musculus GN=Sars PE=2 SV=3
Q64105	Spr	100.0,0.06406,333.78594,	100	6	Sepiapterin reductase OS=Mus musculus GN=Spr PE=1 SV=1
P51180	Mip	33.95,	33.95	13	Lens fiber major intrinsic protein OS=Mus musculus GN=Mip PE=1 SV=2
Q02248	Ctnnb1	30.11814,94.72073,0.00809,55.84701,11.83435,41.63673,100.0,	41.6367	22	Catenin beta-1 OS=Mus musculus GN=Ctnnb1 PE=1 SV=1
P26040	Ezr	91.49559,100.0,98.9002,35.12266,	95.1259	35	Ezrin OS=Mus musculus GN=Ezr PE=1 SV=3
P27659	Rpl3	100.0,21.72395,100.0,1344.59559,	100	11	60S ribosomal protein L3 OS=Mus musculus GN=Rpl3 PE=1 SV=3
P06801	Me1	268.41046,12.75761,6.27168,	12.7576	9	NADP-dependent malic enzyme OS=Mus musculus GN=Me1 PE=1 SV=2
Q9D0F9	Pgm1	6.74634,35.19173,6.05698,102.74838,514.67541,100.0,100.0,	100	16	Phosphoglucomutase-1 OS=Mus musculus GN=Pgm1 PE=1 SV=4
Q9ET01	Pygl	7.21604,0.09023,91.61307,19.08321,100.0,100.0,72.50076,8.44268,2022.85102,	72.5008	24	Glycogen phosphorylase, liver form OS=Mus musculus GN=Pygl PE=1 SV=4
Q8JZQ9	Eif3b	0.0579,100.0,100.0,48.94759,	69.9625	14	Eukaryotic translation initiation factor 3 subunit B OS=Mus musculus GN=Eif3b PE=1 SV=1
Q60737	Csnk2a1	53.42909,50.94519,100.0,100.0,	73.0952	8	Casein kinase II subunit alpha OS=Mus musculus GN=Csnk2a1 PE=1 SV=2
Q91WQ3	Yars	100.0,161.32251,9.57951,52.28101,	72.3056	10	Tyrosine--tRNA ligase, cytoplasmic OS=Mus musculus GN=Yars PE=2 SV=3
Q9Z2W0	Dnpep	3.02633,11.79288,	5.97403	9	Aspartyl aminopeptidase OS=Mus musculus GN=Dnpep PE=2 SV=2
Q9CQD1	Rab5a	586.03607,0.01738,15.64763,	15.6476	6	Ras-related protein Rab-5A OS=Mus musculus GN=Rab5a PE=1 SV=1
P25444	Rps2	512.22738,8.45006,187.18329,243.77541,	213.613	8	40S ribosomal protein S2 OS=Mus musculus GN=Rps2 PE=2 SV=3
Q6ZWV3	Rpl10	2.6885,	2.6885	8	60S ribosomal protein L10 OS=Mus musculus GN=Rpl10 PE=1 SV=3
Q8BP48	Metap1	100.0,100.0,100.0,	100	7	Methionine aminopeptidase 1 OS=Mus musculus GN=Metap1 PE=2 SV=1
Q9JHR7	Ide	148.58208,43.21883,27.84043,0.02271,83895.37108,0.02019,100.0,65.59956,	53.246	16	Insulin-degrading enzyme OS=Mus musculus GN=Ide PE=1 SV=1
Q61035	Hars	100.0,100.0,25.98618,	100	7	Histidine--tRNA ligase, cytoplasmic OS=Mus musculus GN=Hars PE=2 SV=2
P12970	Rpl7a	56.22512,1437.67588,0.11303,	56.2251	9	60S ribosomal protein L7a OS=Mus musculus GN=Rpl7a PE=2 SV=2
Q9CZD3	Gars	39.51987,100.0,43.05957,89.83445,0.00465,100.0,	62.1951	12	Glycine--tRNA ligase OS=Mus musculus GN=Gars PE=1 SV=1
P28656	Nap1l1	100.0,5.43203,63.44761,43.7371,100.0,	63.4476	8	Nucleosome assembly protein 1-like 1 OS=Mus musculus GN=Nap1l1 PE=1 SV=2
P53026	Rpl10a	100.0,100.0,525.51754,26.41754,5.66058,	100	7	60S ribosomal protein L10a OS=Mus musculus GN=Rpl10a PE=1 SV=3
Q923B0	Ggact	0.01539,	0.01539	2	Gamma-glutamylaminecyclotransferase OS=Mus musculus GN=Ggact PE=1 SV=1
P57780	Actn4	3.32737,109.28616,7.82464,27.76893,142.49306,477.49407,100.0,9.58025,	52.6962	15	Alpha-actinin-4 OS=Mus musculus GN=Actn4 PE=1 SV=1
P68134,P68033	Acta1,Actc1	823.10107,6215.99964,232.57875,559.65947,	678.717	26	Actin, alpha skeletal muscle OS=Mus musculus GN=Acta1 PE=1 SV=1 @Actin, alpha cardiac muscle 1 OS=Mus musculus GN=Actc1 PE=1 SV=1
Q9JHU4	Dync1h1	11.76308,82.3678,21.62108,100.0,100.0,100.0,89.11486,100.0,32.56224,100.0,36.52412,417.11048,1192.07963,100.0,100.0,5.53205,34.44311,100.0,21.6098,356.36557,32.0385,100.0,605.76238,	100	96	Cytoplasmic dynein 1 heavy chain 1 OS=Mus musculus GN=Dync1h1 PE=1 SV=2
Q9ER72	Cars	14.18662,40.30387,30.1505,100.0,100.0,266.73009,153.69377,210.35332,275.00871,27.69176,	100	21	Cysteine--tRNA ligase, cytoplasmic OS=Mus musculus GN=Cars PE=2 SV=2
Q922B2	Dars	67.0912,100.0,168.76122,268.46327,	129.908	9	Aspartate--tRNA ligase, cytoplasmic OS=Mus musculus GN=Dars PE=2 SV=2
Q61316	Hspa4	6.38922,100.0,86.21428,100.0,	92.8516	20	Heat shock 70 kDa protein 4 OS=Mus musculus GN=Hspa4 PE=1 SV=1
Q9DBG3	Ap2b1	3.3105,4.8379,0.24179,100.0,7.51541,	4.8379	12	AP-2 complex subunit beta OS=Mus musculus GN=Ap2b1 PE=1 SV=1
O88844	Idh1	251.56434,11131.18371,100.0,	251.564	8	Isocitrate dehydrogenase [NADP] cytoplasmic OS=Mus musculus GN=Idh1 PE=1 SV=2
Q7TPR4	Actn1	109.28616,7.82464,27.76893,18.32471,100.0,100.0,477.49407,12.45161,100.0,	100	17	Alpha-actinin-1 OS=Mus musculus GN=Actn1 PE=1 SV=1
Q9D8E6	Rpl4	124.44426,325.377,9.25007,510.97645,	201.225	10	60S ribosomal protein L4 OS=Mus musculus GN=Rpl4 PE=1 SV=3
Q6ZQ38	Cand1	19.94985,59.06693,367.85352,13.34042,1035.83601,50.36436,	54.5423	17	Cullin-associated NEDD8-dissociated protein 1 OS=Mus musculus GN=Cand1 PE=2 SV=2
P15508	Sptb	100.0,324.64074,132.71604,100.0,81.02715,100.0,5.61005,100.0,258.34982,44.51399,113.42905,22.47244,9.27959,100.0,	100	37	Spectrin beta chain, erythrocytic OS=Mus musculus GN=Sptb PE=1 SV=4
P61458	Pcbd1	31.59548,	31.5955	1	Pterin-4-alpha-carbinolamine dehydratase OS=Mus musculus GN=Pcbd1 PE=1 SV=2
Q8CGC7	Eprs	19.71319,14.97151,102.22045,4.48645,100.0,10.61413,98.00063,100.0,160.2372,100.0,	98.9953	22	Bifunctional glutamate/proline--tRNA ligase OS=Mus musculus GN=Eprs PE=1 SV=4
P47963	Rpl13	594.57221,198.04091,122.524,	198.041	3	60S ribosomal protein L13 OS=Mus musculus GN=Rpl13 PE=2 SV=3
P14685	Psmd3	35.1228,36.71716,76.77383,100.0,16.3696,	36.7172	10	26S proteasome non-ATPase regulatory subunit 3 OS=Mus musculus GN=Psmd3 PE=1 SV=3
Q8CGA0	Ppm1f	35.82605,100.0,11.98155,	35.8261	11	Protein phosphatase 1F OS=Mus musculus GN=Ppm1f PE=2 SV=1
Q91XB0	Trex1	163.01314,41.77049,17.9056,60.45301,	50.2509	4	Three prime repair exonuclease 1 OS=Mus musculus GN=Trex1 PE=1 SV=2
Q8VDM4	Psmd2	7.47629,100.0,15.33229,18.31693,54.19503,100.0,100.0,	54.195	17	26S proteasome non-ATPase regulatory subunit 2 OS=Mus musculus GN=Psmd2 PE=1 SV=1
Q61301	Ctnna2	6.35488,	6.35488	13	Catenin alpha-2 OS=Mus musculus GN=Ctnna2 PE=1 SV=3
O70435	Psma3	97.77214,0.06347,100.0,	97.7721	3	Proteasome subunit alpha type-3 OS=Mus musculus GN=Psma3 PE=1 SV=3
Q8CI94	Pygb	91.61307,19.08321,204.30112,100.0,100.0,100.0,2022.85102,	100	20	Glycogen phosphorylase, brain form OS=Mus musculus GN=Pygb PE=1 SV=3
Q9JLV5	Cul3	285.53534,134.61985,4.56541,25.37216,	58.4431	14	Cullin-3 OS=Mus musculus GN=Cul3 PE=1 SV=1
P50247	Ahcy	66.70648,6.03337,100.0,	66.7065	5	Adenosylhomocysteinase OS=Mus musculus GN=Ahcy PE=1 SV=3
P62334	Psmc6	157.75968,100.0,0.06792,13.09012,1208.20834,	100	6	26S protease regulatory subunit 10B OS=Mus musculus GN=Psmc6 PE=1 SV=1
P28236	Gja8	448.42519,100.0,203.83656,52.90521,	142.771	5	Gap junction alpha-8 protein OS=Mus musculus GN=Gja8 PE=1 SV=2
Q9R0N0	Galk1	18.58785,	18.5878	4	Galactokinase OS=Mus musculus GN=Galk1 PE=2 SV=2
Q6ZQ73	Cand2	48.37145,17.25888,51.21276,33.19945,	40.0737	16	Cullin-associated NEDD8-dissociated protein 2 OS=Mus musculus GN=Cand2 PE=1 SV=2
O88543	Cops3	0.79062,	0.79062	5	COP9 signalosome complex subunit 3 OS=Mus musculus GN=Cops3 PE=1 SV=3
P14824	Anxa6	50.64432,100.0,100.0,100.0,100.0,	100	11	Annexin A6 OS=Mus musculus GN=Anxa6 PE=1 SV=3
Q9CQA1	Trappc5	10.319,	10.319	1	Trafficking protein particle complex subunit 5 OS=Mus musculus GN=Trappc5 PE=1 SV=1
Q9WU28	Pfdn5	0.30376,	0.30376	3	Prefoldin subunit 5 OS=Mus musculus GN=Pfdn5 PE=1 SV=1
P63038	Hspd1	100.0,24.70648,23.6402,	24.7065	5	60 kDa heat shock protein, mitochondrial OS=Mus musculus GN=Hspd1 PE=1 SV=1
P60229	Eif3e	15.78056,200.9526,30.09147,	30.0915	5	Eukaryotic translation initiation factor 3 subunit E OS=Mus musculus GN=Eif3e PE=1 SV=1
Q02053	Uba1	8.03099,193.45273,43.80711,	43.8071	12	Ubiquitin-like modifier-activating enzyme 1 OS=Mus musculus GN=Uba1 PE=1 SV=1
Q6ZPJ3	Ube2o	19.62009,132.79651,0.12575,9.1104,	13.3696	10	Ubiquitin-conjugating enzyme E2 O OS=Mus musculus GN=Ube2o PE=1 SV=3
Q3TXS7	Psmd1	180.42123,504.55718,33.40692,	180.421	11	26S proteasome non-ATPase regulatory subunit 1 OS=Mus musculus GN=Psmd1 PE=1 SV=1
O08917	Flot1	8.60641,27.51433,32.3866,	27.5143	5	Flotillin-1 OS=Mus musculus GN=Flot1 PE=1 SV=1
P19096	Fasn	331.37027,12.94187,21.65859,27.77982,100.0,745.38268,38.60583,10.09779,100.0,	38.6058	19	Fatty acid synthase OS=Mus musculus GN=Fasn PE=1 SV=2
Q9CZX8	Rps19	86.55432,3146.51053,100.0,	100	4	40S ribosomal protein S19 OS=Mus musculus GN=Rps19 PE=1 SV=3
Q8BFY9	Tnpo1	100.0,0.10504,20.19823,46.24168,	30.5614	11	Transportin-1 OS=Mus musculus GN=Tnpo1 PE=1 SV=2
Q5FWK3	Arhgap1	14.33987,	14.3399	3	Rho GTPase-activating protein 1 OS=Mus musculus GN=Arhgap1 PE=1 SV=1
Q66JS6,Q3UGC7	Eif3j1,Eif3j2	8.63752,2338.63174,100.0,	100	3	Eukaryotic translation initiation factor 3 subunit J-B OS=Mus musculus GN=Eif3j2 PE=1 SV=1 @Eukaryotic translation initiation factor 3 subunit J-A OS=Mus musculus GN=Eif3j1 PE=2 SV=1
Q9EPL8	Ipo7	2.79889,	2.79889	18	Importin-7 OS=Mus musculus GN=Ipo7 PE=1 SV=2
Q06138	Cab39	0.94843,	0.94843	5	Calcium-binding protein 39 OS=Mus musculus GN=Cab39 PE=1 SV=2
P54775	Psmc4	72.22797,31.80749,52.47699,	52.477	9	26S protease regulatory subunit 6B OS=Mus musculus GN=Psmc4 PE=1 SV=2
P17426	Ap2a1	5.86762,	5.86762	10	AP-2 complex subunit alpha-1 OS=Mus musculus GN=Ap2a1 PE=1 SV=1
Q9JI91	Actn2	7.82464,27.76893,100.0,270.42216,5.8436,89.21708,	49.7741	8	Alpha-actinin-2 OS=Mus musculus GN=Actn2 PE=1 SV=2
P50516	Atp6v1a	8.10152,100.0,21.24742,22.83847,100.0,	22.8385	8	V-type proton ATPase catalytic subunit A OS=Mus musculus GN=Atp6v1a PE=1 SV=2
Q9Z1Q9	Vars	56.08974,100.0,100.0,199.67467,	100	11	Valine--tRNA ligase OS=Mus musculus GN=Vars PE=2 SV=1
P59325	Eif5	57.85885,	57.8588	2	Eukaryotic translation initiation factor 5 OS=Mus musculus GN=Eif5 PE=1 SV=1
P70398	Usp9x	100.0,5.81451,12.85974,100.0,100.0,9.25336,35.82134,	35.8213	21	Probable ubiquitin carboxyl-terminal hydrolase FAF-X OS=Mus musculus GN=Usp9x PE=1 SV=2
Q3V1L4	Nt5c2	38.63149,14.85586,10.815,	14.8559	4	Cytosolic purine 5'-nucleotidase OS=Mus musculus GN=Nt5c2 PE=1 SV=2
Q9QXS1	Plec	226.05003,9.00693,92.51786,10.0748,100.0,80.15715,26.84254,256.15088,58.15007,12.70845,100.0,9.02765,100.0,208.48952,114.11811,21.23304,100.0,0.02531,	86.116	38	Plectin OS=Mus musculus GN=Plec PE=1 SV=2
Q11011	Npepps	88.07808,13.35213,100.0,0.16311,	34.2933	7	Puromycin-sensitive aminopeptidase OS=Mus musculus GN=Npepps PE=1 SV=2
O08529	Capn2	16.7825,145.425,5.58385,182.4983,	49.4024	8	Calpain-2 catalytic subunit OS=Mus musculus GN=Capn2 PE=2 SV=4
Q8BYA0	Tbcd	482.0617,100.0,115.19703,100.0,100.0,16.227,	100	6	Tubulin-specific chaperone D OS=Mus musculus GN=Tbcd PE=2 SV=1
Q8BG32	Psmd11	8.8806,	8.8806	3	26S proteasome non-ATPase regulatory subunit 11 OS=Mus musculus GN=Psmd11 PE=1 SV=3
Q8VI75	Ipo4	57.20925,100.0,100.0,	100	7	Importin-4 OS=Mus musculus GN=Ipo4 PE=1 SV=1
P23116	Eif3a	11.01929,	11.0193	16	Eukaryotic translation initiation factor 3 subunit A OS=Mus musculus GN=Eif3a PE=1 SV=5
Q8BGZ7,P50446,Q9Z331	Krt6a,Krt6b,Krt75	0.0159,10.62748,	0.41112	6	Keratin, type II cytoskeletal 75 OS=Mus musculus GN=Krt75 PE=1 SV=1 @Keratin, type II cytoskeletal 6A OS=Mus musculus GN=Krt6a PE=2 SV=3 @Keratin, type II cytoskeletal 6B OS=Mus musculus GN=Krt6b PE=2 SV=3
Q9EPK7	Xpo7	1.90688,	1.90688	7	Exportin-7 OS=Mus musculus GN=Xpo7 PE=2 SV=3
Q8C8R3	Ank2	111.70649,120.73627,137.9649,49.29209,100.0,13.52467,18.21462,100.0,	100	22	Ankyrin-2 OS=Mus musculus GN=Ank2 PE=1 SV=2
Q8BZW8	Nhlrc2	5.3248,	5.3248	1	NHL repeat-containing protein 2 OS=Mus musculus GN=Nhlrc2 PE=2 SV=1
Q05D44	Eif5b	52.54759,100.0,100.0,41.39111,	72.4897	6	Eukaryotic translation initiation factor 5B OS=Mus musculus GN=Eif5b PE=1 SV=2
Q64737	Gart	2.26676,	2.26676	4	Trifunctional purine biosynthetic protein adenosine-3 OS=Mus musculus GN=Gart PE=2 SV=3
Q9Z2K1	Krt16	2.63595,	2.63595	5	Keratin, type I cytoskeletal 16 OS=Mus musculus GN=Krt16 PE=1 SV=3
Q9JIF7	Copb1	2.65954,	2.65954	5	Coatomer subunit beta OS=Mus musculus GN=Copb1 PE=1 SV=1
Q8K2I1	Fntb	7.65643,	7.65643	1	Protein farnesyltransferase subunit beta OS=Mus musculus GN=Fntb PE=1 SV=1
Q9WTM5	Ruvbl2	8.12215,	8.12215	1	RuvB-like 2 OS=Mus musculus GN=Ruvbl2 PE=2 SV=3
Q5SSW2	Psme4	2.36213,	2.36213	4	Proteasome activator complex subunit 4 OS=Mus musculus GN=Psme4 PE=1 SV=1
P26043	Rdx		14N Only	25	Radixin OS=Mus musculus GN=Rdx PE=1 SV=3 ;
O35643	Ap1b1		14N Only	19	AP-1 complex subunit beta-1 OS=Mus musculus GN=Ap1b1 PE=2 SV=2 ;
Q99JY9	Actr3		14N Only	15	Actin-related protein 3 OS=Mus musculus GN=Actr3 PE=1 SV=3 ;
P62702	Rps4x		14N Only	15	40S ribosomal protein S4, X isoform OS=Mus musculus GN=Rps4x PE=2 SV=2 ;
P34884	Mif		14N Only	13	Macrophage migration inhibitory factor OS=Mus musculus GN=Mif PE=1 SV=2 ;
P99026	Psmb4		14N Only	12	Proteasome subunit beta type-4 OS=Mus musculus GN=Psmb4 PE=1 SV=1 ;
O88685	Psmc3		14N Only	12	26S protease regulatory subunit 6A OS=Mus musculus GN=Psmc3 PE=1 SV=2 ;
P58044	Idi1		14N Only	11	Isopentenyl-diphosphate Delta-isomerase 1 OS=Mus musculus GN=Idi1 PE=2 SV=1 ;
P14901	Hmox1		14N Only	11	Heme oxygenase 1 OS=Mus musculus GN=Hmox1 PE=1 SV=1 ;
Q61553	Fscn1		14N Only	11	Fascin OS=Mus musculus GN=Fscn1 PE=1 SV=4 ;
Q8BSL7	Arf2		14N Only	10	ADP-ribosylation factor 2 OS=Mus musculus GN=Arf2 PE=1 SV=2 ;
P62082	Rps7		14N Only	10	40S ribosomal protein S7 OS=Mus musculus GN=Rps7 PE=2 SV=1 ;
P10649	Gstm1		14N Only	10	Glutathione S-transferase Mu 1 OS=Mus musculus GN=Gstm1 PE=1 SV=2 ;
P47911	Rpl6		14N Only	10	60S ribosomal protein L6 OS=Mus musculus GN=Rpl6 PE=1 SV=3 ;
P26041	Msn		14N Only	10	Moesin OS=Mus musculus GN=Msn PE=1 SV=3 ;
Q9ERK4	Cse1l		14N Only	10	Exportin-2 OS=Mus musculus GN=Cse1l PE=2 SV=1 ;
P62962	Pfn1		14N Only	9	Profilin-1 OS=Mus musculus GN=Pfn1 PE=1 SV=2 ;
Q9R1P4	Psma1		14N Only	9	Proteasome subunit alpha type-1 OS=Mus musculus GN=Psma1 PE=1 SV=1 ;
P13707	Gpd1		14N Only	9	Glycerol-3-phosphate dehydrogenase [NAD(+)], cytoplasmic OS=Mus musculus GN=Gpd1 PE=1 SV=3 ;
Q9CQC6	Bzw1		14N Only	9	Basic leucine zipper and W2 domain-containing protein 1 OS=Mus musculus GN=Bzw1 PE=1 SV=1 ;
Q9CYT6	Cap2		14N Only	9	Adenylyl cyclase-associated protein 2 OS=Mus musculus GN=Cap2 PE=1 SV=1 ;
O88544	Cops4		14N Only	9	COP9 signalosome complex subunit 4 OS=Mus musculus GN=Cops4 PE=1 SV=1 ;
P56563	Lim2		14N Only	9	Lens fiber membrane intrinsic protein OS=Mus musculus GN=Lim2 PE=1 SV=2 ;
O88342	Wdr1		14N Only	9	WD repeat-containing protein 1 OS=Mus musculus GN=Wdr1 PE=1 SV=3 ;
Q7TNG5	Eml2		14N Only	9	Echinoderm microtubule-associated protein-like 2 OS=Mus musculus GN=Eml2 PE=2 SV=1 ;
P46471	Psmc2		14N Only	9	26S protease regulatory subunit 7 OS=Mus musculus GN=Psmc2 PE=1 SV=5 ;
Q8R146	Apeh		14N Only	9	Acylamino-acid-releasing enzyme OS=Mus musculus GN=Apeh PE=2 SV=3 ;
Q8BMJ2	Lars		14N Only	9	Leucine--tRNA ligase, cytoplasmic OS=Mus musculus GN=Lars PE=1 SV=2 ;
Q99K85	Psat1		14N Only	8	Phosphoserine aminotransferase OS=Mus musculus GN=Psat1 PE=1 SV=1 ;
P97351	Rps3a		14N Only	8	40S ribosomal protein S3a OS=Mus musculus GN=Rps3a PE=1 SV=3 ;
Q80W21	Gstm7		14N Only	8	Glutathione S-transferase Mu 7 OS=Mus musculus GN=Gstm7 PE=1 SV=1 ;
P63094,Q6R0H7	Gnas Gnas		14N Only	8	Guanine nucleotide-binding protein G(s) subunit alpha isoforms short OS=Mus musculus GN=Gnas PE=1 SV=1 ;Guanine nucleotide-binding protein G(s) subunit alpha isoforms XLas OS=Mus musculus GN=Gnas PE=2 SV=1 ;
Q9WTX6	Cul1		14N Only	8	Cullin-1 OS=Mus musculus GN=Cul1 PE=1 SV=1 ;
Q99LG2	Tnpo2		14N Only	8	Transportin-2 OS=Mus musculus GN=Tnpo2 PE=2 SV=1 ;
Q76MZ3	Ppp2r1a		14N Only	8	Serine/threonine-protein phosphatase 2A 65 kDa regulatory subunit A alpha isoform OS=Mus musculus GN=Ppp2r1a PE=1 SV=3 ;
P02535	Krt10		14N Only	8	Keratin, type I cytoskeletal 10 OS=Mus musculus GN=Krt10 PE=1 SV=3 ;
Q8VDN2	Atp1a1		14N Only	8	Sodium/potassium-transporting ATPase subunit alpha-1 OS=Mus musculus GN=Atp1a1 PE=1 SV=1 ;
Q3U1J4	Ddb1		14N Only	8	DNA damage-binding protein 1 OS=Mus musculus GN=Ddb1 PE=1 SV=2 ;
Q8BU30	Iars		14N Only	8	Isoleucine--tRNA ligase, cytoplasmic OS=Mus musculus GN=Iars PE=2 SV=2 ;
P97346	Nxn		14N Only	8	Nucleoredoxin OS=Mus musculus GN=Nxn PE=1 SV=1 ;
P62242	Rps8		14N Only	7	40S ribosomal protein S8 OS=Mus musculus GN=Rps8 PE=1 SV=2 ;
P59999	Arpc4		14N Only	7	Actin-related protein 2/3 complex subunit 4 OS=Mus musculus GN=Arpc4 PE=1 SV=3 ;
Q9R0P5	Dstn		14N Only	7	Destrin OS=Mus musculus GN=Dstn PE=1 SV=3 ;
Q9R1P1	Psmb3		14N Only	7	Proteasome subunit beta type-3 OS=Mus musculus GN=Psmb3 PE=1 SV=1 ;
Q9CVB6	Arpc2		14N Only	7	Actin-related protein 2/3 complex subunit 2 OS=Mus musculus GN=Arpc2 PE=1 SV=3 ;
O35864	Cops5		14N Only	7	COP9 signalosome complex subunit 5 OS=Mus musculus GN=Cops5 PE=1 SV=3 ;
Q9QY48	Dnase2b		14N Only	7	Deoxyribonuclease-2-beta OS=Mus musculus GN=Dnase2b PE=2 SV=1 ;
Q61239	Fnta		14N Only	7	Protein farnesyltransferase/geranylgeranyltransferase type-1 subunit alpha OS=Mus musculus GN=Fnta PE=1 SV=1 ;
Q11136	Pepd		14N Only	7	Xaa-Pro dipeptidase OS=Mus musculus GN=Pepd PE=2 SV=3 ;
P17427	Ap2a2		14N Only	7	AP-2 complex subunit alpha-2 OS=Mus musculus GN=Ap2a2 PE=1 SV=2 ;
O35215	Ddt		14N Only	6	D-dopachrome decarboxylase OS=Mus musculus GN=Ddt PE=1 SV=3 ;
P62889	Rpl30		14N Only	6	60S ribosomal protein L30 OS=Mus musculus GN=Rpl30 PE=2 SV=2 ;
Q9Z2U0	Psma7		14N Only	6	Proteasome subunit alpha type-7 OS=Mus musculus GN=Psma7 PE=1 SV=1 ;
P23506	Pcmt1		14N Only	6	Protein-L-isoaspartate(D-aspartate) O-methyltransferase OS=Mus musculus GN=Pcmt1 PE=1 SV=3 ;
Q9D8B4	Ndufa11		14N Only	6	NADH dehydrogenase [ubiquinone] 1 alpha subcomplex subunit 11 OS=Mus musculus GN=Ndufa11 PE=2 SV=2 ;
P60766	Cdc42		14N Only	6	Cell division control protein 42 homolog OS=Mus musculus GN=Cdc42 PE=1 SV=2 ;
P84084	Arf5		14N Only	6	ADP-ribosylation factor 5 OS=Mus musculus GN=Arf5 PE=1 SV=2 ;
P61759	Vbp1		14N Only	6	Prefoldin subunit 3 OS=Mus musculus GN=Vbp1 PE=2 SV=2 ;
P08556,Q61411	Nras Hras		14N Only	6	GTPase NRas OS=Mus musculus GN=Nras PE=2 SV=1 ;GTPase HRas OS=Mus musculus GN=Hras PE=1 SV=2 ;
O35343	Kpna4		14N Only	6	Importin subunit alpha-3 OS=Mus musculus GN=Kpna4 PE=1 SV=1 ;
Q91VI7	Rnh1		14N Only	6	Ribonuclease inhibitor OS=Mus musculus GN=Rnh1 PE=1 SV=1 ;
P61079,P62838	Ube2d3 Ube2d2		14N Only	6	Ubiquitin-conjugating enzyme E2 D3 OS=Mus musculus GN=Ube2d3 PE=1 SV=1 ;Ubiquitin-conjugating enzyme E2 D2 OS=Mus musculus GN=Ube2d2 PE=1 SV=1 ;
Q8BJY1	Psmd5		14N Only	6	26S proteasome non-ATPase regulatory subunit 5 OS=Mus musculus GN=Psmd5 PE=1 SV=4 ;
P54822	Adsl		14N Only	6	Adenylosuccinate lyase OS=Mus musculus GN=Adsl PE=2 SV=2 ;
Q80UM3	Naa15		14N Only	6	N-alpha-acetyltransferase 15, NatA auxiliary subunit OS=Mus musculus GN=Naa15 PE=1 SV=1 ;
Q6IFX2	Krt42		14N Only	6	Keratin, type I cytoskeletal 42 OS=Mus musculus GN=Krt42 PE=1 SV=1 ;
P04104	Krt1		14N Only	6	Keratin, type II cytoskeletal 1 OS=Mus musculus GN=Krt1 PE=1 SV=4 ;
P67984	Rpl22		14N Only	5	60S ribosomal protein L22 OS=Mus musculus GN=Rpl22 PE=1 SV=2 ;
P62830	Rpl23		14N Only	5	60S ribosomal protein L23 OS=Mus musculus GN=Rpl23 PE=1 SV=1 ;
Q61206	Pafah1b2		14N Only	5	Platelet-activating factor acetylhydrolase IB subunit beta OS=Mus musculus GN=Pafah1b2 PE=1 SV=2 ;
Q8BQM7	Smco3		14N Only	5	Single-pass membrane and coiled-coil domain-containing protein 3 OS=Mus musculus GN=Smco3 PE=2 SV=1 ;
Q9D892	Itpa		14N Only	5	Inosine triphosphate pyrophosphatase OS=Mus musculus GN=Itpa PE=1 SV=2 ;
P60335	Pcbp1		14N Only	5	Poly(rC)-binding protein 1 OS=Mus musculus GN=Pcbp1 PE=1 SV=1 ;
P97461	Rps5		14N Only	5	40S ribosomal protein S5 OS=Mus musculus GN=Rps5 PE=1 SV=3 ;
P97372	Psme2		14N Only	5	Proteasome activator complex subunit 2 OS=Mus musculus GN=Psme2 PE=2 SV=4 ;
P07356	Anxa2		14N Only	5	Annexin A2 OS=Mus musculus GN=Anxa2 PE=1 SV=2 ;
Q91Z53	Grhpr		14N Only	5	Glyoxylate reductase/hydroxypyruvate reductase OS=Mus musculus GN=Grhpr PE=1 SV=1 ;
Q60960	Kpna1		14N Only	5	Importin subunit alpha-5 OS=Mus musculus GN=Kpna1 PE=1 SV=2 ;
P48036	Anxa5		14N Only	5	Annexin A5 OS=Mus musculus GN=Anxa5 PE=1 SV=1 ;
Q9R0Q6	Arpc1a		14N Only	5	Actin-related protein 2/3 complex subunit 1A OS=Mus musculus GN=Arpc1a PE=1 SV=1 ;
P63321,Q9JIW9	Rala Ralb		14N Only	5	Ras-related protein Ral-A OS=Mus musculus GN=Rala PE=1 SV=1 ;Ras-related protein Ral-B OS=Mus musculus GN=Ralb PE=2 SV=1 ;
P61161	Actr2		14N Only	5	Actin-related protein 2 OS=Mus musculus GN=Actr2 PE=1 SV=1 ;
O35344	Kpna3		14N Only	5	Importin subunit alpha-4 OS=Mus musculus GN=Kpna3 PE=1 SV=1 ;
P62814	Atp6v1b2		14N Only	5	V-type proton ATPase subunit B, brain isoform OS=Mus musculus GN=Atp6v1b2 PE=1 SV=1 ;
Q9CZ04	Cops7a		14N Only	5	COP9 signalosome complex subunit 7a OS=Mus musculus GN=Cops7a PE=1 SV=2 ;
P67871	Csnk2b		14N Only	5	Casein kinase II subunit beta OS=Mus musculus GN=Csnk2b PE=1 SV=1 ;
Q99LD4	Gps1		14N Only	5	COP9 signalosome complex subunit 1 OS=Mus musculus GN=Gps1 PE=1 SV=1 ;
P39654	Alox15		14N Only	5	Arachidonate 15-lipoxygenase OS=Mus musculus GN=Alox15 PE=1 SV=4 ;
Q80X95	Rraga		14N Only	5	Ras-related GTP-binding protein A OS=Mus musculus GN=Rraga PE=2 SV=1 ;
Q9QYB8	Add2		14N Only	5	Beta-adducin OS=Mus musculus GN=Add2 PE=1 SV=4 ;
O70310	Nmt1		14N Only	5	Glycylpeptide N-tetradecanoyltransferase 1 OS=Mus musculus GN=Nmt1 PE=1 SV=1 ;
P05201	Got1		14N Only	5	Aspartate aminotransferase, cytoplasmic OS=Mus musculus GN=Got1 PE=1 SV=3 ;
Q6NXH9	Krt73		14N Only	5	Keratin, type II cytoskeletal 73 OS=Mus musculus GN=Krt73 PE=1 SV=1 ;
Q5SQX6	Cyfip2		14N Only	5	Cytoplasmic FMR1-interacting protein 2 OS=Mus musculus GN=Cyfip2 PE=1 SV=2 ;
P70698	Ctps1		14N Only	5	CTP synthase 1 OS=Mus musculus GN=Ctps1 PE=1 SV=2 ;
Q78PY7	Snd1		14N Only	5	Staphylococcal nuclease domain-containing protein 1 OS=Mus musculus GN=Snd1 PE=1 SV=1 ;
Q9D0M5	Dynll2		14N Only	4	Dynein light chain 2, cytoplasmic OS=Mus musculus GN=Dynll2 PE=1 SV=1 ;
O08756	Hsd17b10		14N Only	4	3-hydroxyacyl-CoA dehydrogenase type-2 OS=Mus musculus GN=Hsd17b10 PE=1 SV=4 ;
Q9D0J4	Arl2		14N Only	4	ADP-ribosylation factor-like protein 2 OS=Mus musculus GN=Arl2 PE=1 SV=1 ;
Q9R1P3	Psmb2		14N Only	4	Proteasome subunit beta type-2 OS=Mus musculus GN=Psmb2 PE=1 SV=1 ;
P00493	Hprt1		14N Only	4	Hypoxanthine-guanine phosphoribosyltransferase OS=Mus musculus GN=Hprt1 PE=1 SV=3 ;
P63085	Mapk1		14N Only	4	Mitogen-activated protein kinase 1 OS=Mus musculus GN=Mapk1 PE=1 SV=3 ;
P62196	Psmc5		14N Only	4	26S protease regulatory subunit 8 OS=Mus musculus GN=Psmc5 PE=1 SV=1 ;
Q9CPU0	Glo1		14N Only	4	Lactoylglutathione lyase OS=Mus musculus GN=Glo1 PE=1 SV=3 ;
P62835,Q99JI6	Rap1a Rap1b		14N Only	4	Ras-related protein Rap-1A OS=Mus musculus GN=Rap1a PE=2 SV=1 ;Ras-related protein Rap-1b OS=Mus musculus GN=Rap1b PE=2 SV=2 ;
Q99J09	Wdr77		14N Only	4	Methylosome protein 50 OS=Mus musculus GN=Wdr77 PE=1 SV=1 ;
Q9CZM2	Rpl15		14N Only	4	60S ribosomal protein L15 OS=Mus musculus GN=Rpl15 PE=2 SV=4 ;
Q9CZ30	Ola1		14N Only	4	Obg-like ATPase 1 OS=Mus musculus GN=Ola1 PE=1 SV=1 ;
Q9EQ80	Nif3l1		14N Only	4	Putative GTP cyclohydrolase 1 type 2 Nif3l1 OS=Mus musculus GN=Nif3l1 PE=1 SV=4 ;
Q8BH44	Coro2b		14N Only	4	Coronin-2B OS=Mus musculus GN=Coro2b PE=2 SV=2 ;
Q9CR57	Rpl14		14N Only	4	60S ribosomal protein L14 OS=Mus musculus GN=Rpl14 PE=1 SV=3 ;
O55131	2019-09-07		14N Only	4	Septin-7 OS=Mus musculus GN=Sept7 PE=1 SV=1 ;
P84091	Ap2m1		14N Only	4	AP-2 complex subunit mu OS=Mus musculus GN=Ap2m1 PE=1 SV=1 ;
P61202	Cops2		14N Only	4	COP9 signalosome complex subunit 2 OS=Mus musculus GN=Cops2 PE=1 SV=1 ;
Q9D1A2	Cndp2		14N Only	4	Cytosolic non-specific dipeptidase OS=Mus musculus GN=Cndp2 PE=1 SV=1 ;
Q62465	Vat1		14N Only	4	Synaptic vesicle membrane protein VAT-1 homolog OS=Mus musculus GN=Vat1 PE=1 SV=3 ;
Q9WUL7	Arl3		14N Only	4	ADP-ribosylation factor-like protein 3 OS=Mus musculus GN=Arl3 PE=1 SV=1 ;
Q91ZJ5	Ugp2		14N Only	4	UTP--glucose-1-phosphate uridylyltransferase OS=Mus musculus GN=Ugp2 PE=2 SV=3 ;
Q9D7G0	Prps1		14N Only	4	Ribose-phosphate pyrophosphokinase 1 OS=Mus musculus GN=Prps1 PE=1 SV=4 ;
Q9WVK4	Ehd1		14N Only	4	EH domain-containing protein 1 OS=Mus musculus GN=Ehd1 PE=1 SV=1 ;
Q9QXK3	Copg2		14N Only	4	Coatomer subunit gamma-2 OS=Mus musculus GN=Copg2 PE=2 SV=1 ;
Q9QYH6	Maged1		14N Only	4	Melanoma-associated antigen D1 OS=Mus musculus GN=Maged1 PE=1 SV=1 ;
Q99L27	Gmpr2		14N Only	4	GMP reductase 2 OS=Mus musculus GN=Gmpr2 PE=2 SV=2 ;
Q9CX56	Psmd8		14N Only	4	26S proteasome non-ATPase regulatory subunit 8 OS=Mus musculus GN=Psmd8 PE=1 SV=2 ;
Q3UPL0	Sec31a		14N Only	4	Protein transport protein Sec31A OS=Mus musculus GN=Sec31a PE=1 SV=2 ;
Q9EQQ9	Mgea5		14N Only	4	Bifunctional protein NCOAT OS=Mus musculus GN=Mgea5 PE=1 SV=2 ;
Q9DC69	Ndufa9		14N Only	4	NADH dehydrogenase [ubiquinone] 1 alpha subcomplex subunit 9, mitochondrial OS=Mus musculus GN=Ndufa9 PE=1 SV=2 ;
Q61879	Myh10		14N Only	4	Myosin-10 OS=Mus musculus GN=Myh10 PE=1 SV=2 ;
P39447	Tjp1		14N Only	4	Tight junction protein ZO-1 OS=Mus musculus GN=Tjp1 PE=1 SV=2 ;
P70349	Hint1		14N Only	3	Histidine triad nucleotide-binding protein 1 OS=Mus musculus GN=Hint1 PE=1 SV=3 ;
P09671	Sod2		14N Only	3	Superoxide dismutase [Mn], mitochondrial OS=Mus musculus GN=Sod2 PE=1 SV=3 ;
Q9CQC9	Sar1b		14N Only	3	GTP-binding protein SAR1b OS=Mus musculus GN=Sar1b PE=1 SV=1 ;
P62821	Rab1A		14N Only	3	Ras-related protein Rab-1A OS=Mus musculus GN=Rab1A PE=1 SV=3 ;
O35593	Psmd14		14N Only	3	26S proteasome non-ATPase regulatory subunit 14 OS=Mus musculus GN=Psmd14 PE=1 SV=2 ;
P62918	Rpl8		14N Only	3	60S ribosomal protein L8 OS=Mus musculus GN=Rpl8 PE=2 SV=2 ;
P62717	Rpl18a		14N Only	3	60S ribosomal protein L18a OS=Mus musculus GN=Rpl18a PE=1 SV=1 ;
Q9CPR4	Rpl17		14N Only	3	60S ribosomal protein L17 OS=Mus musculus GN=Rpl17 PE=2 SV=3 ;
Q9JLJ2	Aldh9a1		14N Only	3	4-trimethylaminobutyraldehyde dehydrogenase OS=Mus musculus GN=Aldh9a1 PE=1 SV=1 ;
Q8VCA8	Scrn2		14N Only	3	Secernin-2 OS=Mus musculus GN=Scrn2 PE=2 SV=1 ;
Q93092	Taldo1		14N Only	3	Transaldolase OS=Mus musculus GN=Taldo1 PE=1 SV=2 ;
Q62433	Ndrg1		14N Only	3	Protein NDRG1 OS=Mus musculus GN=Ndrg1 PE=1 SV=1 ;
Q8K274	Fn3krp		14N Only	3	Ketosamine-3-kinase OS=Mus musculus GN=Fn3krp PE=2 SV=2 ;
P47757	Capzb		14N Only	3	F-actin-capping protein subunit beta OS=Mus musculus GN=Capzb PE=1 SV=3 ;
Q9DD18	Dtd1		14N Only	3	D-tyrosyl-tRNA(Tyr) deacylase 1 OS=Mus musculus GN=Dtd1 PE=1 SV=2 ;
P48758	Cbr1		14N Only	3	Carbonyl reductase [NADPH] 1 OS=Mus musculus GN=Cbr1 PE=1 SV=3 ;
P05132	Prkaca		14N Only	3	cAMP-dependent protein kinase catalytic subunit alpha OS=Mus musculus GN=Prkaca PE=1 SV=3 ;
P63005	Pafah1b1		14N Only	3	Platelet-activating factor acetylhydrolase IB subunit alpha OS=Mus musculus GN=Pafah1b1 PE=1 SV=2 ;
P62754	Rps6		14N Only	3	40S ribosomal protein S6 OS=Mus musculus GN=Rps6 PE=1 SV=1 ;
O89079	Cope		14N Only	3	Coatomer subunit epsilon OS=Mus musculus GN=Cope PE=2 SV=3 ;
Q9CPV4	Glod4		14N Only	3	Glyoxalase domain-containing protein 4 OS=Mus musculus GN=Glod4 PE=1 SV=1 ;
P42208	2019-09-02		14N Only	3	Septin-2 OS=Mus musculus GN=Sept2 PE=1 SV=2 ;
Q91WK2	Eif3h		14N Only	3	Eukaryotic translation initiation factor 3 subunit H OS=Mus musculus GN=Eif3h PE=1 SV=1 ;
Q9WU84	Ccs		14N Only	3	Copper chaperone for superoxide dismutase OS=Mus musculus GN=Ccs PE=2 SV=1 ;
P62141,P63087	Ppp1cb Ppp1cc		14N Only	3	Serine/threonine-protein phosphatase PP1-beta catalytic subunit OS=Mus musculus GN=Ppp1cb PE=1 SV=3 ;Serine/threonine-protein phosphatase PP1-gamma catalytic subunit OS=Mus musculus GN=Ppp1cc PE=1 SV=1 ;
P53810	Pitpna		14N Only	3	Phosphatidylinositol transfer protein alpha isoform OS=Mus musculus GN=Pitpna PE=1 SV=2 ;
P24270	Cat		14N Only	3	Catalase OS=Mus musculus GN=Cat PE=1 SV=4 ;
P40124	Cap1		14N Only	3	Adenylyl cyclase-associated protein 1 OS=Mus musculus GN=Cap1 PE=1 SV=4 ;
Q80X73	Pelo		14N Only	3	Protein pelota homolog OS=Mus musculus GN=Pelo PE=2 SV=3 ;
P48962	Slc25a4		14N Only	3	ADP/ATP translocase 1 OS=Mus musculus GN=Slc25a4 PE=1 SV=4 ;
Q9D8W5	Psmd12		14N Only	3	26S proteasome non-ATPase regulatory subunit 12 OS=Mus musculus GN=Psmd12 PE=1 SV=4 ;
Q9WUM4	Coro1c		14N Only	3	Coronin-1C OS=Mus musculus GN=Coro1c PE=1 SV=2 ;
Q8BK64	Ahsa1		14N Only	3	Activator of 90 kDa heat shock protein ATPase homolog 1 OS=Mus musculus GN=Ahsa1 PE=2 SV=2 ;
Q9QYC0	Add1		14N Only	3	Alpha-adducin OS=Mus musculus GN=Add1 PE=1 SV=2 ;
P53994,P59279	Rab2a Rab2b		14N Only	3	Ras-related protein Rab-2A OS=Mus musculus GN=Rab2a PE=1 SV=1 ;Ras-related protein Rab-2B OS=Mus musculus GN=Rab2b PE=2 SV=1 ;
P62960	Ybx1		14N Only	3	Nuclease-sensitive element-binding protein 1 OS=Mus musculus GN=Ybx1 PE=1 SV=3 ;
Q9Z127	Slc7a5		14N Only	3	Large neutral amino acids transporter small subunit 1 OS=Mus musculus GN=Slc7a5 PE=1 SV=2 ;
Q99KK7	Dpp3		14N Only	3	Dipeptidyl peptidase 3 OS=Mus musculus GN=Dpp3 PE=2 SV=2 ;
Q9WUA2	Farsb		14N Only	3	Phenylalanine--tRNA ligase beta subunit OS=Mus musculus GN=Farsb PE=2 SV=2 ;
Q99JX4	Eif3m		14N Only	3	Eukaryotic translation initiation factor 3 subunit M OS=Mus musculus GN=Eif3m PE=2 SV=1 ;
O70194	Eif3d		14N Only	3	Eukaryotic translation initiation factor 3 subunit D OS=Mus musculus GN=Eif3d PE=1 SV=2 ;
P22907	Hmbs		14N Only	3	Porphobilinogen deaminase OS=Mus musculus GN=Hmbs PE=1 SV=2 ;
O35682	Myadm		14N Only	3	Myeloid-associated differentiation marker OS=Mus musculus GN=Myadm PE=2 SV=2 ;
Q3UM45	Ppp1r7		14N Only	3	Protein phosphatase 1 regulatory subunit 7 OS=Mus musculus GN=Ppp1r7 PE=1 SV=2 ;
Q3TCH7	Cul4a		14N Only	3	Cullin-4A OS=Mus musculus GN=Cul4a PE=1 SV=1 ;
Q9QZB7	Actr10		14N Only	3	Actin-related protein 10 OS=Mus musculus GN=Actr10 PE=1 SV=2 ;
Q68FL6	Mars		14N Only	3	Methionine--tRNA ligase, cytoplasmic OS=Mus musculus GN=Mars PE=2 SV=1 ;
P48722	Hspa4l		14N Only	3	Heat shock 70 kDa protein 4L OS=Mus musculus GN=Hspa4l PE=1 SV=2 ;
A2BDX3	Mocs3		14N Only	3	Adenylyltransferase and sulfurtransferase MOCS3 OS=Mus musculus GN=Mocs3 PE=2 SV=1 ;
Q6P1F6Q925E7Q6ZWR4	Ppp2r2a Ppp2r2d Ppp2r2b		14N Only	3	Serine/threonine-protein phosphatase 2A 55 kDa regulatory subunit B alpha isoform OS=Mus musculus GN=Ppp2r2a PE=1 SV=1 ;Serine/threonine-protein phosphatase 2A 55 kDa regulatory subunit B delta isoform OS=Mus musculus GN=Ppp2r2d PE=2 SV=1 ;Serine/threonine-protein phosphatase 2A 55 kDa regulatory subunit B beta isoform OS=Mus musculus GN=Ppp2r2b PE=1 SV=1 ;
Q9Z1Z0	Uso1		14N Only	3	General vesicular transport factor p115 OS=Mus musculus GN=Uso1 PE=1 SV=2 ;
Q91VR5	Ddx1		14N Only	3	ATP-dependent RNA helicase DDX1 OS=Mus musculus GN=Ddx1 PE=1 SV=1 ;
Q6P5F9	Xpo1		14N Only	3	Exportin-1 OS=Mus musculus GN=Xpo1 PE=1 SV=1 ;
P33173	Kif1a		14N Only	3	Kinesin-like protein KIF1A OS=Mus musculus GN=Kif1a PE=1 SV=2 ;
Q91V92	Acly		14N Only	3	ATP-citrate synthase OS=Mus musculus GN=Acly PE=1 SV=1 ;
P62264	Rps14		14N Only	2	40S ribosomal protein S14 OS=Mus musculus GN=Rps14 PE=2 SV=3 ;
Q9CPQ8	Atp5l		14N Only	2	ATP synthase subunit g, mitochondrial OS=Mus musculus GN=Atp5l PE=1 SV=1 ;
P0CG49,P62984,P62983,P0CG50	Ubb Uba52 Rps27a Ubc		14N Only	2	Polyubiquitin-B OS=Mus musculus GN=Ubb PE=2 SV=1 ;Ubiquitin-60S ribosomal protein L40 OS=Mus musculus GN=Uba52 PE=1 SV=2 ;Ubiquitin-40S ribosomal protein S27a OS=Mus musculus GN=Rps27a PE=1 SV=2 ;Polyubiquitin-C OS=Mus musculus GN=Ubc PE=1 SV=2 ;
Q60692	Psmb6		14N Only	2	Proteasome subunit beta type-6 OS=Mus musculus GN=Psmb6 PE=1 SV=3 ;
P61514	Rpl37a		14N Only	2	60S ribosomal protein L37a OS=Mus musculus GN=Rpl37a PE=2 SV=2 ;
P60867	Rps20		14N Only	2	40S ribosomal protein S20 OS=Mus musculus GN=Rps20 PE=1 SV=1 ;
Q9JJI8	Rpl38		14N Only	2	60S ribosomal protein L38 OS=Mus musculus GN=Rpl38 PE=2 SV=3 ;
P62281	Rps11		14N Only	2	40S ribosomal protein S11 OS=Mus musculus GN=Rps11 PE=1 SV=3 ;
Q8R3U1	Pla2g16		14N Only	2	HRAS-like suppressor 3 OS=Mus musculus GN=Pla2g16 PE=1 SV=2 ;
Q9CQ54	Ndufc2		14N Only	2	NADH dehydrogenase [ubiquinone] 1 subunit C2 OS=Mus musculus GN=Ndufc2 PE=1 SV=1 ;
P62245	Rps15a		14N Only	2	40S ribosomal protein S15a OS=Mus musculus GN=Rps15a PE=1 SV=2 ;
Q99PT1	Arhgdia		14N Only	2	Rho GDP-dissociation inhibitor 1 OS=Mus musculus GN=Arhgdia PE=1 SV=3 ;
P62307	Snrpf		14N Only	2	Small nuclear ribonucleoprotein F OS=Mus musculus GN=Snrpf PE=2 SV=1 ;
P63325	Rps10		14N Only	2	40S ribosomal protein S10 OS=Mus musculus GN=Rps10 PE=1 SV=1 ;
P14115	Rpl27a		14N Only	2	60S ribosomal protein L27a OS=Mus musculus GN=Rpl27a PE=2 SV=5 ;
P97371	Psme1		14N Only	2	Proteasome activator complex subunit 1 OS=Mus musculus GN=Psme1 PE=2 SV=2 ;
Q8BVI4	Qdpr		14N Only	2	Dihydropteridine reductase OS=Mus musculus GN=Qdpr PE=1 SV=2 ;
P83877	Txnl4a		14N Only	2	Thioredoxin-like protein 4A OS=Mus musculus GN=Txnl4a PE=2 SV=1 ;
P61087	Ube2k		14N Only	2	Ubiquitin-conjugating enzyme E2 K OS=Mus musculus GN=Ube2k PE=1 SV=3 ;
Q9CXW4	Rpl11		14N Only	2	60S ribosomal protein L11 OS=Mus musculus GN=Rpl11 PE=1 SV=4 ;
O70325,Q91XR9	Gpx4 Gpx4		14N Only	2	Phospholipid hydroperoxide glutathione peroxidase, mitochondrial OS=Mus musculus GN=Gpx4 PE=1 SV=4 ;Phospholipid hydroperoxide glutathione peroxidase, nuclear OS=Mus musculus GN=Gpx4 PE=2 SV=3 ;
P24369	Ppib		14N Only	2	Peptidyl-prolyl cis-trans isomerase B OS=Mus musculus GN=Ppib PE=1 SV=2 ;
P62270	Rps18		14N Only	2	40S ribosomal protein S18 OS=Mus musculus GN=Rps18 PE=1 SV=3 ;
Q9CQV8	Ywhab		14N Only	2	14-3-3 protein beta/alpha OS=Mus musculus GN=Ywhab PE=1 SV=3 ;
Q91ZR1	Rab4b		14N Only	2	Ras-related protein Rab-4B OS=Mus musculus GN=Rab4b PE=2 SV=2 ;
Q9JHW2	Nit2		14N Only	2	Omega-amidase NIT2 OS=Mus musculus GN=Nit2 PE=1 SV=1 ;
P10853,Q9D2U9,Q8CGP2,Q8CGP1,Q8CGP0,Q6ZWY9,Q64525,Q64524,Q64478,Q64475,P10854	Hist1h2bf Hist3h2ba Hist1h2bp Hist1h2bk Hist3h2bb Hist1h2bc Hist2h2bb Hist2h2be Hist1h2bh Hist1h2bb Hist1h2bm		14N Only	2	Histone H2B type 1-F/J/L OS=Mus musculus GN=Hist1h2bf PE=1 SV=2 ;Histone H2B type 3-A OS=Mus musculus GN=Hist3h2ba PE=1 SV=3 ;Histone H2B type 1-P OS=Mus musculus GN=Hist1h2bp PE=1 SV=3 ;Histone H2B type 1-K OS=Mus musculus GN=Hist1h2bk PE=1 SV=3 ;Histone H2B type 3-B OS=Mus musculus GN=Hist3h2bb PE=1 SV=3 ;Histone H2B type 1-C/E/G OS=Mus musculus GN=Hist1h2bc PE=1 SV=3 ;Histone H2B type 2-B OS=M…
P61021	Rab5b		14N Only	2	Ras-related protein Rab-5B OS=Mus musculus GN=Rab5b PE=1 SV=1 ;
P36536	Sar1a		14N Only	2	GTP-binding protein SAR1a OS=Mus musculus GN=Sar1a PE=2 SV=1 ;
Q91VH6	Memo1		14N Only	2	Protein MEMO1 OS=Mus musculus GN=Memo1 PE=1 SV=1 ;
P62849	Rps24		14N Only	2	40S ribosomal protein S24 OS=Mus musculus GN=Rps24 PE=2 SV=1 ;
Q91YI0	Asl		14N Only	2	Argininosuccinate lyase OS=Mus musculus GN=Asl PE=1 SV=1 ;
P47754	Capza2		14N Only	2	F-actin-capping protein subunit alpha-2 OS=Mus musculus GN=Capza2 PE=1 SV=3 ;
Q9WTP6	Ak2		14N Only	2	Adenylate kinase 2, mitochondrial OS=Mus musculus GN=Ak2 PE=1 SV=5 ;
Q923D2	Blvrb		14N Only	2	Flavin reductase (NADPH) OS=Mus musculus GN=Blvrb PE=2 SV=3 ;
Q6ZWN5	Rps9		14N Only	2	40S ribosomal protein S9 OS=Mus musculus GN=Rps9 PE=1 SV=3 ;
Q9CQQ7	Atp5f1		14N Only	2	ATP synthase F(0) complex subunit B1, mitochondrial OS=Mus musculus GN=Atp5f1 PE=1 SV=1 ;
Q9JII6	Akr1a1		14N Only	2	Alcohol dehydrogenase [NADP(+)] OS=Mus musculus GN=Akr1a1 PE=1 SV=3 ;
O54950	Prkag1		14N Only	2	5'-AMP-activated protein kinase subunit gamma-1 OS=Mus musculus GN=Prkag1 PE=1 SV=2 ;
Q01730	Rsu1		14N Only	2	Ras suppressor protein 1 OS=Mus musculus GN=Rsu1 PE=2 SV=3 ;
Q9CQP2	Trappc2		14N Only	2	Trafficking protein particle complex subunit 2 OS=Mus musculus GN=Trappc2 PE=1 SV=1 ;
P62751	Rpl23a		14N Only	2	60S ribosomal protein L23a OS=Mus musculus GN=Rpl23a PE=1 SV=1 ;
Q9R062	Gyg1		14N Only	2	Glycogenin-1 OS=Mus musculus GN=Gyg1 PE=2 SV=3 ;
P62192	Psmc1		14N Only	2	26S protease regulatory subunit 4 OS=Mus musculus GN=Psmc1 PE=1 SV=1 ;
Q9CR68	Uqcrfs1		14N Only	2	Cytochrome b-c1 complex subunit Rieske, mitochondrial OS=Mus musculus GN=Uqcrfs1 PE=1 SV=1 ;
P63276	Rps17		14N Only	2	40S ribosomal protein S17 OS=Mus musculus GN=Rps17 PE=1 SV=2 ;
Q9WVJ2	Psmd13		14N Only	2	26S proteasome non-ATPase regulatory subunit 13 OS=Mus musculus GN=Psmd13 PE=1 SV=1 ;
Q8BVE3	Atp6v1h		14N Only	2	V-type proton ATPase subunit H OS=Mus musculus GN=Atp6v1h PE=1 SV=1 ;
Q91V41	Rab14		14N Only	2	Ras-related protein Rab-14 OS=Mus musculus GN=Rab14 PE=1 SV=3 ;
Q8BWY3	Etf1		14N Only	2	Eukaryotic peptide chain release factor subunit 1 OS=Mus musculus GN=Etf1 PE=1 SV=4 ;
P50580	Pa2g4		14N Only	2	Proliferation-associated protein 2G4 OS=Mus musculus GN=Pa2g4 PE=1 SV=3 ;
P46638,P62492	Rab11b Rab11a		14N Only	2	Ras-related protein Rab-11B OS=Mus musculus GN=Rab11b PE=1 SV=3 ;Ras-related protein Rab-11A OS=Mus musculus GN=Rab11a PE=1 SV=3 ;
P61979	Hnrnpk		14N Only	2	Heterogeneous nuclear ribonucleoprotein K OS=Mus musculus GN=Hnrnpk PE=1 SV=1 ;
Q8VDQ8	Sirt2		14N Only	2	NAD-dependent protein deacetylase sirtuin-2 OS=Mus musculus GN=Sirt2 PE=1 SV=2 ;
Q9DCH4	Eif3f		14N Only	2	Eukaryotic translation initiation factor 3 subunit F OS=Mus musculus GN=Eif3f PE=1 SV=2 ;
O35639	Anxa3		14N Only	2	Annexin A3 OS=Mus musculus GN=Anxa3 PE=1 SV=4 ;
Q60634	Flot2		14N Only	2	Flotillin-2 OS=Mus musculus GN=Flot2 PE=1 SV=2 ;
Q8BP47	Nars		14N Only	2	Asparagine--tRNA ligase, cytoplasmic OS=Mus musculus GN=Nars PE=1 SV=2 ;
Q9QUR6	Prep		14N Only	2	Prolyl endopeptidase OS=Mus musculus GN=Prep PE=2 SV=1 ;
Q6NSR8	Npepl1		14N Only	2	Probable aminopeptidase NPEPL1 OS=Mus musculus GN=Npepl1 PE=2 SV=1 ;
Q6P1B1	Xpnpep1		14N Only	2	Xaa-Pro aminopeptidase 1 OS=Mus musculus GN=Xpnpep1 PE=2 SV=1 ;
P24527	Lta4h		14N Only	2	Leukotriene A-4 hydrolase OS=Mus musculus GN=Lta4h PE=1 SV=4 ;
Q920Q8	Ivns1abp		14N Only	2	Influenza virus NS1A-binding protein homolog OS=Mus musculus GN=Ivns1abp PE=1 SV=2 ;
P17225	Ptbp1		14N Only	2	Polypyrimidine tract-binding protein 1 OS=Mus musculus GN=Ptbp1 PE=1 SV=2 ;
O70318	Epb41l2		14N Only	2	Band 4.1-like protein 2 OS=Mus musculus GN=Epb41l2 PE=1 SV=2 ;
P98203	Arvcf		14N Only	2	Armadillo repeat protein deleted in velo-cardio-facial syndrome homolog OS=Mus musculus GN=Arvcf PE=1 SV=2 ;
Q91W89	Man2c1		14N Only	2	Alpha-mannosidase 2C1 OS=Mus musculus GN=Man2c1 PE=2 SV=1 ;
Q9Z1W9	Stk39		14N Only	2	STE20/SPS1-related proline-alanine-rich protein kinase OS=Mus musculus GN=Stk39 PE=1 SV=1 ;
Q7TQI7	Abtb2		14N Only	2	Ankyrin repeat and BTB/POZ domain-containing protein 2 OS=Mus musculus GN=Abtb2 PE=2 SV=1 ;
Q8BH57	Wdr48		14N Only	2	WD repeat-containing protein 48 OS=Mus musculus GN=Wdr48 PE=1 SV=1 ;
P08003	Pdia4		14N Only	2	Protein disulfide-isomerase A4 OS=Mus musculus GN=Pdia4 PE=1 SV=3 ;
Q9D5V5	Cul5		14N Only	2	Cullin-5 OS=Mus musculus GN=Cul5 PE=1 SV=3 ;
Q6PGB8	Smarca1		14N Only	2	Probable global transcription activator SNF2L1 OS=Mus musculus GN=Smarca1 PE=1 SV=1 ;
P70670,Q60817	Naca Naca		14N Only	2	Nascent polypeptide-associated complex subunit alpha, muscle-specific form OS=Mus musculus GN=Naca PE=1 SV=2 ;Nascent polypeptide-associated complex subunit alpha OS=Mus musculus GN=Naca PE=1 SV=1 ;
O08788	Dctn1		14N Only	2	Dynactin subunit 1 OS=Mus musculus GN=Dctn1 PE=1 SV=3 ;
Q8BHG1	Nrd1		14N Only	2	Nardilysin OS=Mus musculus GN=Nrd1 PE=1 SV=1 ;
Q8BWZ3	Naa25		14N Only	2	N-alpha-acetyltransferase 25, NatB auxiliary subunit OS=Mus musculus GN=Naa25 PE=2 SV=1 ;
Q6NZJ6	Eif4g1		14N Only	2	Eukaryotic translation initiation factor 4 gamma 1 OS=Mus musculus GN=Eif4g1 PE=1 SV=1 ;
E9Q557	Dsp		14N Only	2	Desmoplakin OS=Mus musculus GN=Dsp PE=1 SV=1 ;
P08032	Spta1		14N Only	2	Spectrin alpha chain, erythrocytic 1 OS=Mus musculus GN=Spta1 PE=2 SV=3 ;
Q6PGC1	Dhx29		14N Only	2	ATP-dependent RNA helicase Dhx29 OS=Mus musculus GN=Dhx29 PE=2 SV=1 ;
Q9QXZ0	Macf1		14N Only	2	Microtubule-actin cross-linking factor 1 OS=Mus musculus GN=Macf1 PE=1 SV=2 ;
P17095	Hmga1		14N Only	1	High mobility group protein HMG-I/HMG-Y OS=Mus musculus GN=Hmga1 PE=1 SV=4 ;
P62858	Rps28		14N Only	1	40S ribosomal protein S28 OS=Mus musculus GN=Rps28 PE=2 SV=1 ;
P18760	Cfl1		14N Only	1	Cofilin-1 OS=Mus musculus GN=Cfl1 PE=1 SV=3 ;
P62315	Snrpd1		14N Only	1	Small nuclear ribonucleoprotein Sm D1 OS=Mus musculus GN=Snrpd1 PE=2 SV=1 ;
P50543	S100a11		14N Only	1	Protein S100-A11 OS=Mus musculus GN=S100a11 PE=1 SV=1 ;
P51807	Dynlt1		14N Only	1	Dynein light chain Tctex-type 1 OS=Mus musculus GN=Dynlt1 PE=1 SV=1 ;
Q6ZWU9,Q6ZWY3	Rps27 Rps27l		14N Only	1	40S ribosomal protein S27 OS=Mus musculus GN=Rps27 PE=1 SV=3 ;40S ribosomal protein S27-like OS=Mus musculus GN=Rps27l PE=2 SV=3 ;
P07091	S100a4		14N Only	1	Protein S100-A4 OS=Mus musculus GN=S100a4 PE=1 SV=1 ;
P68037	Ube2l3		14N Only	1	Ubiquitin-conjugating enzyme E2 L3 OS=Mus musculus GN=Ube2l3 PE=2 SV=1 ;
O35683	Ndufa1		14N Only	1	NADH dehydrogenase [ubiquinone] 1 alpha subcomplex subunit 1 OS=Mus musculus GN=Ndufa1 PE=3 SV=1 ;
P62274	Rps29		14N Only	1	40S ribosomal protein S29 OS=Mus musculus GN=Rps29 PE=2 SV=2 ;
Q64433	Hspe1		14N Only	1	10 kDa heat shock protein, mitochondrial OS=Mus musculus GN=Hspe1 PE=1 SV=2 ;
P63323	Rps12		14N Only	1	40S ribosomal protein S12 OS=Mus musculus GN=Rps12 PE=1 SV=2 ;
P62855	Rps26		14N Only	1	40S ribosomal protein S26 OS=Mus musculus GN=Rps26 PE=2 SV=3 ;
P56135	Atp5j2		14N Only	1	ATP synthase subunit f, mitochondrial OS=Mus musculus GN=Atp5j2 PE=1 SV=3 ;
P10639	Txn		14N Only	1	Thioredoxin OS=Mus musculus GN=Txn PE=1 SV=3 ;
P34022	Ranbp1		14N Only	1	Ran-specific GTPase-activating protein OS=Mus musculus GN=Ranbp1 PE=1 SV=2 ;
P62900	Rpl31		14N Only	1	60S ribosomal protein L31 OS=Mus musculus GN=Rpl31 PE=1 SV=1 ;
P61971	Nutf2		14N Only	1	Nuclear transport factor 2 OS=Mus musculus GN=Nutf2 PE=2 SV=1 ;
Q9CQR2	Rps21		14N Only	1	40S ribosomal protein S21 OS=Mus musculus GN=Rps21 PE=2 SV=1 ;
Q8BHG2			14N Only	1	UPF0587 protein C1orf123 homolog OS=Mus musculus PE=2 SV=1 ;
P61089	Ube2n		14N Only	1	Ubiquitin-conjugating enzyme E2 N OS=Mus musculus GN=Ube2n PE=1 SV=1 ;
P56380	Nudt2		14N Only	1	Bis(5'-nucleosyl)-tetraphosphatase [asymmetrical] OS=Mus musculus GN=Nudt2 PE=1 SV=3 ;
P47964	Rpl36		14N Only	1	60S ribosomal protein L36 OS=Mus musculus GN=Rpl36 PE=2 SV=2 ;
O09167	Rpl21		14N Only	1	60S ribosomal protein L21 OS=Mus musculus GN=Rpl21 PE=2 SV=3 ;
Q9DCS2			14N Only	1	UPF0585 protein C16orf13 homolog OS=Mus musculus PE=1 SV=1 ;
O88851	Rbbp9		14N Only	1	Putative hydrolase RBBP9 OS=Mus musculus GN=Rbbp9 PE=1 SV=2 ;
P24547	Impdh2		14N Only	1	Inosine-5'-monophosphate dehydrogenase 2 OS=Mus musculus GN=Impdh2 PE=1 SV=2 ;
Q9CQT1	Mri1		14N Only	1	Methylthioribose-1-phosphate isomerase OS=Mus musculus GN=Mri1 PE=2 SV=1 ;
Q9DCT1	Akr1e2		14N Only	1	1,5-anhydro-D-fructose reductase OS=Mus musculus GN=Akr1e2 PE=1 SV=1 ;
Q9CQU0	Txndc12		14N Only	1	Thioredoxin domain-containing protein 12 OS=Mus musculus GN=Txndc12 PE=2 SV=1 ;
P63028	Tpt1		14N Only	1	Translationally-controlled tumor protein OS=Mus musculus GN=Tpt1 PE=1 SV=1 ;
Q9Z223	Mocs2		14N Only	1	Molybdopterin synthase catalytic subunit OS=Mus musculus GN=Mocs2 PE=2 SV=3 ;
P62267	Rps23		14N Only	1	40S ribosomal protein S23 OS=Mus musculus GN=Rps23 PE=1 SV=3 ;
Q9D8S4	Rexo2		14N Only	1	Oligoribonuclease, mitochondrial OS=Mus musculus GN=Rexo2 PE=1 SV=2 ;
Q9ERS2	Ndufa13		14N Only	1	NADH dehydrogenase [ubiquinone] 1 alpha subcomplex subunit 13 OS=Mus musculus GN=Ndufa13 PE=1 SV=3 ;
Q9DB05	Napa		14N Only	1	Alpha-soluble NSF attachment protein OS=Mus musculus GN=Napa PE=1 SV=1 ;
P62911	Rpl32		14N Only	1	60S ribosomal protein L32 OS=Mus musculus GN=Rpl32 PE=1 SV=2 ;
Q99P31	Hspbp1		14N Only	1	Hsp70-binding protein 1 OS=Mus musculus GN=Hspbp1 PE=2 SV=1 ;
Q8VBV7	Cops8		14N Only	1	COP9 signalosome complex subunit 8 OS=Mus musculus GN=Cops8 PE=1 SV=1 ;
P62852	Rps25		14N Only	1	40S ribosomal protein S25 OS=Mus musculus GN=Rps25 PE=1 SV=1 ;
O88545	Cops6		14N Only	1	COP9 signalosome complex subunit 6 OS=Mus musculus GN=Cops6 PE=1 SV=1 ;
Q62348	Tsn		14N Only	1	Translin OS=Mus musculus GN=Tsn PE=1 SV=1 ;
Q8VE04	Mob3b		14N Only	1	MOB kinase activator 3B OS=Mus musculus GN=Mob3b PE=2 SV=1 ;
P35980	Rpl18		14N Only	1	60S ribosomal protein L18 OS=Mus musculus GN=Rpl18 PE=2 SV=3 ;
Q9D1R9	Rpl34		14N Only	1	60S ribosomal protein L34 OS=Mus musculus GN=Rpl34 PE=1 SV=2 ;
Reverse_sp|P50615|BTG3_MOUSE	Btg3		14N Only	1	Protein BTG3 OS=Mus musculus GN=Btg3 PE=2 SV=1 ;
Q9CQW1	Ykt6		14N Only	1	Synaptobrevin homolog YKT6 OS=Mus musculus GN=Ykt6 PE=2 SV=1 ;
Q9DD02	L7rn6		14N Only	1	Protein Hikeshi OS=Mus musculus GN=L7rn6 PE=2 SV=1 ;
P61358	Rpl27		14N Only	1	60S ribosomal protein L27 OS=Mus musculus GN=Rpl27 PE=1 SV=2 ;
Q9CZD0	Mmachc		14N Only	1	Methylmalonic aciduria and homocystinuria type C protein homolog OS=Mus musculus GN=Mmachc PE=2 SV=2 ;
Q9DCZ1	Gmpr		14N Only	1	GMP reductase 1 OS=Mus musculus GN=Gmpr PE=2 SV=1 ;
Q9ES56	Trappc4		14N Only	1	Trafficking protein particle complex subunit 4 OS=Mus musculus GN=Trappc4 PE=1 SV=1 ;
P00920	Ca2		14N Only	1	Carbonic anhydrase 2 OS=Mus musculus GN=Ca2 PE=1 SV=4 ;
Q9CQ60	Pgls		14N Only	1	6-phosphogluconolactonase OS=Mus musculus GN=Pgls PE=2 SV=1 ;
Q9JM76	Arpc3		14N Only	1	Actin-related protein 2/3 complex subunit 3 OS=Mus musculus GN=Arpc3 PE=1 SV=3 ;
Q63844	Mapk3		14N Only	1	Mitogen-activated protein kinase 3 OS=Mus musculus GN=Mapk3 PE=1 SV=5 ;
Q6P069	Sri		14N Only	1	Sorcin OS=Mus musculus GN=Sri PE=1 SV=1 ;
Q9CZY3,Q9D2M8	Ube2v1 Ube2v2		14N Only	1	Ubiquitin-conjugating enzyme E2 variant 1 OS=Mus musculus GN=Ube2v1 PE=1 SV=1 ;Ubiquitin-conjugating enzyme E2 variant 2 OS=Mus musculus GN=Ube2v2 PE=2 SV=4 ;
Q9DB29	Iah1		14N Only	1	Isoamyl acetate-hydrolyzing esterase 1 homolog OS=Mus musculus GN=Iah1 PE=1 SV=1 ;
Q9ER35	Fn3k		14N Only	1	Fructosamine-3-kinase OS=Mus musculus GN=Fn3k PE=2 SV=1 ;
P35802	Gpm6a		14N Only	1	Neuronal membrane glycoprotein M6-a OS=Mus musculus GN=Gpm6a PE=1 SV=1 ;
P55258	Rab8a		14N Only	1	Ras-related protein Rab-8A OS=Mus musculus GN=Rab8a PE=1 SV=2 ;
Q9D358	Acp1		14N Only	1	Low molecular weight phosphotyrosine protein phosphatase OS=Mus musculus GN=Acp1 PE=1 SV=3 ;
Q8BP67	Rpl24		14N Only	1	60S ribosomal protein L24 OS=Mus musculus GN=Rpl24 PE=1 SV=2 ;
Q8CHH9	2019-09-08		14N Only	1	Septin-8 OS=Mus musculus GN=Sept8 PE=1 SV=4 ;
P70662	Ldb1		14N Only	1	LIM domain-binding protein 1 OS=Mus musculus GN=Ldb1 PE=1 SV=2 ;
Q9D7H3	RtcA		14N Only	1	RNA 3'-terminal phosphate cyclase OS=Mus musculus GN=RtcA PE=2 SV=2 ;
P61027	Rab10		14N Only	1	Ras-related protein Rab-10 OS=Mus musculus GN=Rab10 PE=1 SV=1 ;
Q3UIU2	Ndufb6		14N Only	1	NADH dehydrogenase [ubiquinone] 1 beta subcomplex subunit 6 OS=Mus musculus GN=Ndufb6 PE=1 SV=3 ;
Q8CG76	Akr7a2		14N Only	1	Aflatoxin B1 aldehyde reductase member 2 OS=Mus musculus GN=Akr7a2 PE=1 SV=3 ;
Q99LC5	Etfa		14N Only	1	Electron transfer flavoprotein subunit alpha, mitochondrial OS=Mus musculus GN=Etfa PE=1 SV=2 ;
P97765	Wbp2		14N Only	1	WW domain-binding protein 2 OS=Mus musculus GN=Wbp2 PE=1 SV=1 ;
P21279	Gnaq		14N Only	1	Guanine nucleotide-binding protein G(q) subunit alpha OS=Mus musculus GN=Gnaq PE=1 SV=4 ;
Q9CZ42	Carkd		14N Only	1	ATP-dependent (S)-NAD(P)H-hydrate dehydratase OS=Mus musculus GN=Carkd PE=1 SV=1 ;
Q9CR67	Tmem33		14N Only	1	Transmembrane protein 33 OS=Mus musculus GN=Tmem33 PE=2 SV=1 ;
Q99L13	Hibadh		14N Only	1	3-hydroxyisobutyrate dehydrogenase, mitochondrial OS=Mus musculus GN=Hibadh PE=1 SV=1 ;
Q9CQH3	Ndufb5		14N Only	1	NADH dehydrogenase [ubiquinone] 1 beta subcomplex subunit 5, mitochondrial OS=Mus musculus GN=Ndufb5 PE=1 SV=1 ;
O08663	Metap2		14N Only	1	Methionine aminopeptidase 2 OS=Mus musculus GN=Metap2 PE=1 SV=1 ;
Q99JW4	Lims1		14N Only	1	LIM and senescent cell antigen-like-containing domain protein 1 OS=Mus musculus GN=Lims1 PE=1 SV=3 ;
P56399	Usp5		14N Only	1	Ubiquitin carboxyl-terminal hydrolase 5 OS=Mus musculus GN=Usp5 PE=1 SV=1 ;
P45376	Akr1b1		14N Only	1	Aldose reductase OS=Mus musculus GN=Akr1b1 PE=1 SV=3 ;
P51881	Slc25a5		14N Only	1	ADP/ATP translocase 2 OS=Mus musculus GN=Slc25a5 PE=1 SV=3 ;
O55023	Impa1		14N Only	1	Inositol monophosphatase 1 OS=Mus musculus GN=Impa1 PE=1 SV=1 ;
Q9DCC4	Pycrl		14N Only	1	Pyrroline-5-carboxylate reductase 3 OS=Mus musculus GN=Pycrl PE=2 SV=2 ;
Q9DC70	Ndufs7		14N Only	1	NADH dehydrogenase [ubiquinone] iron-sulfur protein 7, mitochondrial OS=Mus musculus GN=Ndufs7 PE=1 SV=1 ;
Q61205	Pafah1b3		14N Only	1	Platelet-activating factor acetylhydrolase IB subunit gamma OS=Mus musculus GN=Pafah1b3 PE=1 SV=1 ;
Q99MN1	Kars		14N Only	1	Lysine--tRNA ligase OS=Mus musculus GN=Kars PE=1 SV=1 ;
P23591	Tsta3		14N Only	1	GDP-L-fucose synthase OS=Mus musculus GN=Tsta3 PE=2 SV=3 ;
Q61990	Pcbp2		14N Only	1	Poly(rC)-binding protein 2 OS=Mus musculus GN=Pcbp2 PE=1 SV=1 ;
Q9Z1K6	Arih2		14N Only	1	E3 ubiquitin-protein ligase ARIH2 OS=Mus musculus GN=Arih2 PE=1 SV=1 ;
P60122	Ruvbl1		14N Only	1	RuvB-like 1 OS=Mus musculus GN=Ruvbl1 PE=1 SV=1 ;
Q9DB77	Uqcrc2		14N Only	1	Cytochrome b-c1 complex subunit 2, mitochondrial OS=Mus musculus GN=Uqcrc2 PE=1 SV=1 ;
Q8VD66	Abhd4		14N Only	1	Abhydrolase domain-containing protein 4 OS=Mus musculus GN=Abhd4 PE=2 SV=1 ;
P23492	Pnp		14N Only	1	Purine nucleoside phosphorylase OS=Mus musculus GN=Pnp PE=1 SV=2 ;
Q64448	Gja3		14N Only	1	Gap junction alpha-3 protein OS=Mus musculus GN=Gja3 PE=2 SV=4 ;
P08249	Mdh2		14N Only	1	Malate dehydrogenase, mitochondrial OS=Mus musculus GN=Mdh2 PE=1 SV=3 ;
P97864	Casp7		14N Only	1	Caspase-7 OS=Mus musculus GN=Casp7 PE=1 SV=2 ;
Q60963	Pla2g7		14N Only	1	Platelet-activating factor acetylhydrolase OS=Mus musculus GN=Pla2g7 PE=2 SV=2 ;
Q91WU5	As3mt		14N Only	1	Arsenite methyltransferase OS=Mus musculus GN=As3mt PE=2 SV=2 ;
P30416	Fkbp4		14N Only	1	Peptidyl-prolyl cis-trans isomerase FKBP4 OS=Mus musculus GN=Fkbp4 PE=1 SV=5 ;
Q3TMH2	Scrn3		14N Only	1	Secernin-3 OS=Mus musculus GN=Scrn3 PE=1 SV=1 ;
Q9CZC8	Scrn1		14N Only	1	Secernin-1 OS=Mus musculus GN=Scrn1 PE=1 SV=1 ;
Q3UGR5	Hdhd2		14N Only	1	Haloacid dehalogenase-like hydrolase domain-containing protein 2 OS=Mus musculus GN=Hdhd2 PE=1 SV=2 ;
Q9JIF0	Prmt1		14N Only	1	Protein arginine N-methyltransferase 1 OS=Mus musculus GN=Prmt1 PE=1 SV=1 ;
P10518	Alad		14N Only	1	Delta-aminolevulinic acid dehydratase OS=Mus musculus GN=Alad PE=1 SV=1 ;
P61222	Abce1		14N Only	1	ATP-binding cassette sub-family E member 1 OS=Mus musculus GN=Abce1 PE=2 SV=1 ;
P20152	Vim		14N Only	1	Vimentin OS=Mus musculus GN=Vim PE=1 SV=3 ;
Q8R010	Aimp2		14N Only	1	Aminoacyl tRNA synthase complex-interacting multifunctional protein 2 OS=Mus musculus GN=Aimp2 PE=1 SV=2 ;
P42669	Pura		14N Only	1	Transcriptional activator protein Pur-alpha OS=Mus musculus GN=Pura PE=1 SV=1 ;
P29341	Pabpc1		14N Only	1	Polyadenylate-binding protein 1 OS=Mus musculus GN=Pabpc1 PE=1 SV=2 ;
P34914	Ephx2		14N Only	1	Bifunctional epoxide hydrolase 2 OS=Mus musculus GN=Ephx2 PE=1 SV=2 ;
Q7TMY7	Ipo8		14N Only	1	Importin-8 OS=Mus musculus GN=Ipo8 PE=1 SV=3 ;
A6H6A9	Rabgap1l		14N Only	1	Rab GTPase-activating protein 1-like OS=Mus musculus GN=Rabgap1l PE=1 SV=1 ;
O88746	Tom1		14N Only	1	Target of Myb protein 1 OS=Mus musculus GN=Tom1 PE=1 SV=1 ;
P47856	Gfpt1		14N Only	1	Glutamine--fructose-6-phosphate aminotransferase [isomerizing] 1 OS=Mus musculus GN=Gfpt1 PE=1 SV=3 ;
P38647	Hspa9		14N Only	1	Stress-70 protein, mitochondrial OS=Mus musculus GN=Hspa9 PE=1 SV=3 ;
P54071	Idh2		14N Only	1	Isocitrate dehydrogenase [NADP], mitochondrial OS=Mus musculus GN=Idh2 PE=1 SV=3 ;
P35585	Ap1m1		14N Only	1	AP-1 complex subunit mu-1 OS=Mus musculus GN=Ap1m1 PE=1 SV=3 ;
Q61768	Kif5b		14N Only	1	Kinesin-1 heavy chain OS=Mus musculus GN=Kif5b PE=1 SV=3 ;
O55029	Copb2		14N Only	1	Coatomer subunit beta' OS=Mus musculus GN=Copb2 PE=2 SV=2 ;
O88487	Dync1i2		14N Only	1	Cytoplasmic dynein 1 intermediate chain 2 OS=Mus musculus GN=Dync1i2 PE=1 SV=1 ;
P18052	Ptpra		14N Only	1	Receptor-type tyrosine-protein phosphatase alpha OS=Mus musculus GN=Ptpra PE=1 SV=3 ;
Q8C1A5	Thop1		14N Only	1	Thimet oligopeptidase OS=Mus musculus GN=Thop1 PE=1 SV=1 ;
Q9CPN8	Igf2bp3		14N Only	1	Insulin-like growth factor 2 mRNA-binding protein 3 OS=Mus musculus GN=Igf2bp3 PE=1 SV=1 ;
Q99JW2	Acy1		14N Only	1	Aminoacylase-1 OS=Mus musculus GN=Acy1 PE=1 SV=1 ;
Q9EQH3	Vps35		14N Only	1	Vacuolar protein sorting-associated protein 35 OS=Mus musculus GN=Vps35 PE=1 SV=1 ;
Q69ZS7	Hbs1l		14N Only	1	HBS1-like protein OS=Mus musculus GN=Hbs1l PE=1 SV=2 ;
Q7TMK9	Syncrip		14N Only	1	Heterogeneous nuclear ribonucleoprotein Q OS=Mus musculus GN=Syncrip PE=1 SV=2 ;
Q9D6Z1	Nop56		14N Only	1	Nucleolar protein 56 OS=Mus musculus GN=Nop56 PE=1 SV=2 ;
Q8CBY8	Dctn4		14N Only	1	Dynactin subunit 4 OS=Mus musculus GN=Dctn4 PE=1 SV=1 ;
Q9WU78	Pdcd6ip		14N Only	1	Programmed cell death 6-interacting protein OS=Mus musculus GN=Pdcd6ip PE=1 SV=3 ;
Q8CHT1	Ngef		14N Only	1	Ephexin-1 OS=Mus musculus GN=Ngef PE=1 SV=1 ;
Q7TT45,Q99K70	Rragd Rragc		14N Only	1	Ras-related GTP-binding protein D OS=Mus musculus GN=Rragd PE=2 SV=2 ;Ras-related GTP-binding protein C OS=Mus musculus GN=Rragc PE=1 SV=1 ;
P15116	Cdh2		14N Only	1	Cadherin-2 OS=Mus musculus GN=Cdh2 PE=1 SV=2 ;
P48193	Epb41		14N Only	1	Protein 4.1 OS=Mus musculus GN=Epb41 PE=1 SV=2 ;
Q05A80	Caprin2		14N Only	1	Caprin-2 OS=Mus musculus GN=Caprin2 PE=1 SV=1 ;
O08810	Eftud2		14N Only	1	116 kDa U5 small nuclear ribonucleoprotein component OS=Mus musculus GN=Eftud2 PE=2 SV=1 ;
Q9CYR6	Pgm3		14N Only	1	Phosphoacetylglucosamine mutase OS=Mus musculus GN=Pgm3 PE=1 SV=1 ;
Q91YE6	Ipo9		14N Only	1	Importin-9 OS=Mus musculus GN=Ipo9 PE=1 SV=3 ;
Q571I9	Aldh16a1		14N Only	1	Aldehyde dehydrogenase family 16 member A1 OS=Mus musculus GN=Aldh16a1 PE=2 SV=2 ;
Q3UDE2	Ttll12		14N Only	1	Tubulin--tyrosine ligase-like protein 12 OS=Mus musculus GN=Ttll12 PE=2 SV=1 ;
Q61024	Asns		14N Only	1	Asparagine synthetase [glutamine-hydrolyzing] OS=Mus musculus GN=Asns PE=2 SV=3 ;
Q8BHN3	Ganab		14N Only	1	Neutral alpha-glucosidase AB OS=Mus musculus GN=Ganab PE=1 SV=1 ;
Q80WQ2	Vac14		14N Only	1	Protein VAC14 homolog OS=Mus musculus GN=Vac14 PE=1 SV=1 ;
Q80TM9	Nisch		14N Only	1	Nischarin OS=Mus musculus GN=Nisch PE=1 SV=2 ;
O70133	Dhx9		14N Only	1	ATP-dependent RNA helicase A OS=Mus musculus GN=Dhx9 PE=1 SV=2 ;
Q8R1B4	Eif3c		14N Only	1	Eukaryotic translation initiation factor 3 subunit C OS=Mus musculus GN=Eif3c PE=1 SV=1 ;
Q9WV92	Epb41l3		14N Only	1	Band 4.1-like protein 3 OS=Mus musculus GN=Epb41l3 PE=1 SV=1 ;
O35379	Abcc1		14N Only	1	Multidrug resistance-associated protein 1 OS=Mus musculus GN=Abcc1 PE=1 SV=1 ;
Q8CIE6	Copa		14N Only	1	Coatomer subunit alpha OS=Mus musculus GN=Copa PE=1 SV=2 ;
B1AY13	Usp24		14N Only	1	Ubiquitin carboxyl-terminal hydrolase 24 OS=Mus musculus GN=Usp24 PE=1 SV=1 ;
Q70IV5	Synm		14N Only	1	Synemin OS=Mus musculus GN=Synm PE=1 SV=2 ;
Q04690	Nf1		14N Only	1	Neurofibromin OS=Mus musculus GN=Nf1 PE=1 SV=1 ;
Q6V4S5	Sdk2		14N Only	1	Protein sidekick-2 OS=Mus musculus GN=Sdk2 PE=2 SV=1 ;
Reverse_sp|Q8C147|DOCK8_MOUSE	Dock8		14N Only	1	Dedicator of cytokinesis protein 8 OS=Mus musculus GN=Dock8 PE=1 SV=4 ;
Q05793	Hspg2		14N Only	1	Basement membrane-specific heparan sulfate proteoglycan core protein OS=Mus musculus GN=Hspg2 PE=1 SV=1 ;
Q8BTM8	Flna		14N Only	1	Filamin-A OS=Mus musculus GN=Flna PE=1 SV=5 ;
Q80X90	Flnb		14N Only	1	Filamin-B OS=Mus musculus GN=Flnb PE=1 SV=3 ;
A2AN08	Ubr4		14N Only	1	E3 ubiquitin-protein ligase UBR4 OS=Mus musculus GN=Ubr4 PE=1 SV=1 ;
Q920Q4	Vps16		15N Only	2	Vacuolar protein sorting-associated protein 16 homolog OS=Mus musculus GN=Vps16 PE=1 SV=3 ;
P56480	Atp5b		15N Only	1	ATP synthase subunit beta, mitochondrial OS=Mus musculus GN=Atp5b PE=1 SV=2 ;
Reverse_sp|Q6PAV2|HERC4_MOUSE	Herc4		15N Only	1	Probable E3 ubiquitin-protein ligase HERC4 OS=Mus musculus GN=Herc4 PE=2 SV=2 ;
Reverse_sp|Q6PFE3|RA54B_MOUSE	Rad54b		15N Only	1	DNA repair and recombination protein RAD54B OS=Mus musculus GN=Rad54b PE=2 SV=1 ;
Reverse_sp|E9Q3T6|PRD14_MOUSE	Prdm14		15N Only	1	PR domain zinc finger protein 14 OS=Mus musculus GN=Prdm14 PE=1 SV=1 ;
Reverse_sp|Q80V70|MEGF6_MOUSE	Megf6		15N Only	1	Multiple epidermal growth factor-like domains protein 6 OS=Mus musculus GN=Megf6 PE=2 SV=3 ;
A2ASS6	Ttn		15N Only	1	Titin OS=Mus musculus GN=Ttn PE=1 SV=1 ;

## Sheet: Sclera choroid 
Table S4. A complete list of sclera/choroid proteins identified by mass spectrometry
Uniprot Entry	Gene symbol	Peptide ratio(s) (14N/15N)	Composite ratio (14N/15N)	Spectra count	Protein names
Q5SX39	Myh4	0.02208,0.04404,0.04404,0.02139,0.0305,0.03973,0.03312,0.03986,0.07723,0.02535,0.02488,	0.05	299	Myosin-4 (Myosin heavy chain 2b) (MyHC-2b) (Myosin heavy chain 4)
Q5SX40	Myh1	0.06003,0.04404,0.04404,0.02139,0.01454,0.0305,0.0579,0.03973,0.03312,0.05346,0.05749,0.02535,0.02488,0.04276,	0.05	260	Myosin-1 (Myosin heavy chain 1) (Myosin heavy chain 2x) (MyHC-2x) (Myosin heavy chain, skeletal muscle, adult 1)
P13542	Myh8 Myhsp	0.02208,0.04404,0.04404,0.01454,0.0305,0.03973,0.03312,0.02535,0.02488,0.04276,	0.05	197	Myosin-8 (Myosin heavy chain 8) (Myosin heavy chain, skeletal muscle, perinatal) (MyHC-perinatal)
P56480	Atp5f1b Atp5b	0.03836,0.04314,0.03799,0.03746,0.03749,0.02805,0.05632,0.04693,	0.05	90	ATP synthase subunit beta, mitochondrial (EC 7.1.2.2) (ATP synthase F1 subunit beta)
P60710	Actb	0.34895,0.01005,0.29101,0.47826,0.26895,0.09476,	0.05	184	Actin, cytoplasmic 1 (Beta-actin) [Cleaved into: Actin, cytoplasmic 1, N-terminally processed]
P63260	Actg1 Actg	0.34895,0.01005,0.29101,0.47826,0.26895,0.09476,	0.05	184	Actin, cytoplasmic 2 (Gamma-actin) [Cleaved into: Actin, cytoplasmic 2, N-terminally processed]
Q03265	Atp5f1a Atp5a1	0.07305,0.03022,0.0295,0.03171,0.04464,	0.05	70	ATP synthase subunit alpha, mitochondrial (ATP synthase F1 subunit alpha)
Q8R429	Atp2a1	0.01267,0.01875,0.02375,0.01982,	0.05	103	Sarcoplasmic/endoplasmic reticulum calcium ATPase 1 (SERCA1) (SR Ca(2+)-ATPase 1) (EC 3.6.3.8) (Calcium pump 1) (Calcium-transporting ATPase sarcoplasmic reticulum type, fast twitch skeletal muscle isoform) (Endoplasmic reticulum class 1/2 Ca(2+) ATPase)
P16858	Gapdh Gapd	0.05754,0.03925,0.03436,0.06022,0.0506,0.05356,0.05781,0.06514,	0.05	95	Glyceraldehyde-3-phosphate dehydrogenase (GAPDH) (EC 1.2.1.12) (Peptidyl-cysteine S-nitrosylase GAPDH) (EC 2.6.99.-)
P17182	Eno1 Eno-1	0.03087,0.02998,0.02676,0.02206,0.03517,0.04521,0.03491,	0.05	85	Alpha-enolase (EC 4.2.1.11) (2-phospho-D-glycerate hydro-lyase) (Enolase 1) (Non-neural enolase) (NNE)
P82198	Tgfbi	0.02716,0.02765,0.02717,0.02842,0.0265,	0.05	99	Transforming growth factor-beta-induced protein ig-h3 (Beta ig-h3)
P05213	Tuba1b Tuba2	0.01991,0.03344,0.03344,	0.05	95	Tubulin alpha-1B chain (Alpha-tubulin 2) (Alpha-tubulin isotype M-alpha-2) (Tubulin alpha-2 chain) [Cleaved into: Detyrosinated tubulin alpha-1B chain]
P13541	Myh3 Myhse	0.06003,0.04404,0.04404,0.02139,0.05755,1.07774,0.15185,	0.05	115	Myosin-3 (Myosin heavy chain 3)
P52480	Pkm Pk3 Pkm2 Pykm	0.16772,0.04492,0.04946,0.03418,0.01557,0.01525,2.10521,1.46998,	0.05	110	Pyruvate kinase PKM (EC 2.7.1.40) (Pyruvate kinase muscle isozyme)
Q91Z83	Myh7	0.06003,0.04404,0.04404,0.02139,0.05755,0.01454,0.15185,	0.05	65	Myosin-7 (Myosin heavy chain 7) (Myosin heavy chain slow isoform) (MyHC-slow) (Myosin heavy chain, cardiac muscle beta isoform) (MyHC-beta)
Q02566	Myh6 Myhca	0.06003,0.04404,0.04404,0.02139,0.05755,0.01454,1.07774,0.15185,	0.05	63	Myosin-6 (Myosin heavy chain 6) (Myosin heavy chain, cardiac muscle alpha isoform) (MyHC-alpha)
P68369	Tuba1a Tuba1	0.0285,0.01991,0.03911,	0.05	92	Tubulin alpha-1A chain (Alpha-tubulin 1) (Alpha-tubulin isotype M-alpha-1) (Tubulin alpha-1 chain) [Cleaved into: Detyrosinated tubulin alpha-1A chain]
P40142	Tkt	0.00904,0.00796,0.00509,	0.05	158	Transketolase (TK) (EC 2.2.1.1) (P68)
P07356	Anxa2 Anx2 Cal1h	0.02242,0.02435,0.02411,	0.05	89	Annexin A2 (Annexin II) (Annexin-2) (Calpactin I heavy chain) (Calpactin-1 heavy chain) (Chromobindin-8) (Lipocortin II) (Placental anticoagulant protein IV) (PAP-IV) (Protein I) (p36)
P28654	Dcn	0.03107,0.02354,	0.05	122	Decorin (Bone proteoglycan II) (PG-S2) (PG40)
P68373	Tuba1c Tuba6	0.01514,0.01991,0.03911,	0.05	90	Tubulin alpha-1C chain (Alpha-tubulin 6) (Alpha-tubulin isotype M-alpha-6) (Tubulin alpha-6 chain) [Cleaved into: Detyrosinated tubulin alpha-1C chain]
P68368	Tuba4a Tuba4	0.03344,0.03344,	0.05	76	Tubulin alpha-4A chain (Alpha-tubulin 4) (Alpha-tubulin isotype M-alpha-4) (Tubulin alpha-4 chain)
P05214	Tuba3a Tuba3; Tuba3b Tuba7	0.0285,0.01991,0.03911,	0.05	85	Tubulin alpha-3 chain (Alpha-tubulin 3/7) (Alpha-tubulin isotype M-alpha-3/7) (Tubulin alpha-3/alpha-7 chain) [Cleaved into: Detyrosinated tubulin alpha-3 chain]
P06151	Ldha Ldh-1 Ldh1	0.05462,0.04643,	0.05	28	L-lactate dehydrogenase A chain (LDH-A) (EC 1.1.1.27) (LDH muscle subunit) (LDH-M)
P21550	Eno3 Eno-3	0.03087,0.03517,0.04521,0.03491,	0.05	57	Beta-enolase (EC 4.2.1.11) (2-phospho-D-glycerate hydro-lyase) (Enolase 3) (Muscle-specific enolase) (MSE) (Skeletal muscle enolase)
O55143	Atp2a2	0.01875,0.01982,	0.05	49	Sarcoplasmic/endoplasmic reticulum calcium ATPase 2 (SERCA2) (SR Ca(2+)-ATPase 2) (EC 3.6.3.8) (Calcium pump 2) (Calcium-transporting ATPase sarcoplasmic reticulum type, slow twitch skeletal muscle isoform) (Endoplasmic reticulum class 1/2 Ca(2+) ATPase)
P17183	Eno2 Eno-2	0.03087,0.03517,0.04521,0.03491,	0.05	36	Gamma-enolase (EC 4.2.1.11) (2-phospho-D-glycerate hydro-lyase) (Enolase 2) (Neural enolase) (Neuron-specific enolase) (NSE)
P20152	Vim	0.02198,0.03492,	0.05	65	Vimentin
Q02257	Jup	0.06241,0.14926,0.071,	0.05	32	Junction plakoglobin (Desmoplakin III) (Desmoplakin-3)
P50608	Fmod	0.00719,	0.05	74	Fibromodulin (FM) (Collagen-binding 59 kDa protein) (Keratan sulfate proteoglycan fibromodulin) (KSPG fibromodulin)
Q9DB20	Atp5po Atp5o D12Wsu28e	NA	0.05	21	ATP synthase subunit O, mitochondrial (ATP synthase peripheral stalk subunit OSCP) (Oligomycin sensitivity conferral protein) (OSCP)
Q6GQT1	A2m A2mp	0.07655,0.14261,0.00418,	0.05	168	Alpha-2-macroglobulin-P (Alpha-2-macroglobulin)
P09411	Pgk1 Pgk-1	0.01404,	0.05	51	Phosphoglycerate kinase 1 (EC 2.7.2.3)
Q61696	Hspa1a Hsp70-3 Hsp70A1	8.41925,0.67001,	0.05	38	Heat shock 70 kDa protein 1A (Heat shock 70 kDa protein 3) (HSP70.3) (Hsp68)
Q62009	Postn Osf2	0.07211,0.04545,	0.05	31	Periostin (PN) (Osteoblast-specific factor 2) (OSF-2)
Q9JJZ2	Tuba8	0.01514,0.03911,	0.05	44	Tubulin alpha-8 chain (Alpha-tubulin 8)
P48962	Slc25a4 Anc1 Ant1	0.07349,0.27971,0.03915,0.03271,	0.05	30	ADP/ATP translocase 1 (ADP,ATP carrier protein 1) (ADP,ATP carrier protein, heart/skeletal muscle isoform T1) (Adenine nucleotide translocator 1) (ANT 1) (Solute carrier family 25 member 4) (mANC1)
P05202	Got2 Got-2	NA	0.05	35	Aspartate aminotransferase, mitochondrial (mAspAT) (EC 2.6.1.1) (EC 2.6.1.7) (Fatty acid-binding protein) (FABP-1) (Glutamate oxaloacetate transaminase 2) (Kynurenine aminotransferase 4) (Kynurenine aminotransferase IV) (Kynurenine--oxoglutarate transaminase 4) (Kynurenine--oxoglutarate transaminase IV) (Plasma membrane-associated fatty acid-binding protein) (FABPpm) (Transaminase A)
Q8BH59	Slc25a12 Aralar1	0.04584,0.04362,	0.05	22	Calcium-binding mitochondrial carrier protein Aralar1 (Mitochondrial aspartate glutamate carrier 1) (Solute carrier family 25 member 12)
Q9Z1T2	Thbs4 Tsp4	0.09543,	0.05	27	Thrombospondin-4
P51881	Slc25a5 Ant2	0.07349,0.03915,0.03271,	0.05	22	ADP/ATP translocase 2 (ADP,ATP carrier protein 2) (Adenine nucleotide translocator 2) (ANT 2) (Solute carrier family 25 member 5) [Cleaved into: ADP/ATP translocase 2, N-terminally processed]
Q8BMF4	Dlat	0.05175,	0.05	12	Dihydrolipoyllysine-residue acetyltransferase component of pyruvate dehydrogenase complex, mitochondrial (EC 2.3.1.12) (Dihydrolipoamide acetyltransferase component of pyruvate dehydrogenase complex) (Pyruvate dehydrogenase complex component E2) (PDC-E2) (PDCE2)
P07724	Alb Alb-1 Alb1	NA	0.05	267	Serum albumin
P57780	Actn4	0.03147,0.03147,	0.05	96	Alpha-actinin-4 (Non-muscle alpha-actinin 4)
Q7TPR4	Actn1	1.47756,0.03147,0.03147,	0.05	58	Alpha-actinin-1 (Alpha-actinin cytoskeletal isoform) (F-actin cross-linking protein) (Non-muscle alpha-actinin-1)
Q922U2	Krt5 Krt2-5	0.21398,	0.05	98	Keratin, type II cytoskeletal 5 (Cytokeratin-5) (CK-5) (Keratin-5) (K5) (Type-II keratin Kb5)
Q8VDN2	Atp1a1	NA	0.05	72	Sodium/potassium-transporting ATPase subunit alpha-1 (Na(+)/K(+) ATPase alpha-1 subunit) (EC 3.6.3.9) (Sodium pump subunit alpha-1)
P63017	Hspa8 Hsc70 Hsc73	0.1472,1.18086,0.05191,	0.05	59	Heat shock cognate 71 kDa protein (Heat shock 70 kDa protein 8)
Q9JI91	Actn2	0.03147,0.03147,0.14364,	0.05	46	Alpha-actinin-2 (Alpha-actinin skeletal muscle isoform 2) (F-actin cross-linking protein)
Q6PIC6	Atp1a3	NA	0.05	55	Sodium/potassium-transporting ATPase subunit alpha-3 (Na(+)/K(+) ATPase alpha-3 subunit) (EC 3.6.3.9) (Na(+)/K(+) ATPase alpha(III) subunit) (Sodium pump subunit alpha-3)
Q99KI0	Aco2	0.12072,	0.05	38	Aconitate hydratase, mitochondrial (Aconitase) (EC 4.2.1.3) (Citrate hydro-lyase)
P10126	Eef1a1 Eef1a	0.21585,	0.05	47	Elongation factor 1-alpha 1 (EF-1-alpha-1) (Elongation factor Tu) (EF-Tu) (Eukaryotic elongation factor 1 A-1) (eEF1A-1)
Q6PIE5	Atp1a2	0.10321,	0.05	46	Sodium/potassium-transporting ATPase subunit alpha-2 (Na(+)/K(+) ATPase alpha-2 subunit) (EC 3.6.3.9) (Na(+)/K(+) ATPase alpha(+) subunit) (Sodium pump subunit alpha-2)
Q61598	Gdi2 Gdi3	0.14908,	0.05	30	Rab GDP dissociation inhibitor beta (Rab GDI beta) (GDI-3) (Guanosine diphosphate dissociation inhibitor 2) (GDI-2)
P06745	Gpi Gpi1	0.01545,	0.05	47	Glucose-6-phosphate isomerase (GPI) (EC 5.3.1.9) (Autocrine motility factor) (AMF) (Neuroleukin) (NLK) (Phosphoglucose isomerase) (PGI) (Phosphohexose isomerase) (PHI)
P48036	Anxa5 Anx5	NA	0.05	47	Annexin A5 (Anchorin CII) (Annexin V) (Annexin-5) (Calphobindin I) (CBP-I) (Endonexin II) (Lipocortin V) (Placental anticoagulant protein 4) (PP4) (Placental anticoagulant protein I) (PAP-I) (Thromboplastin inhibitor) (Vascular anticoagulant-alpha) (VAC-alpha)
P62874	Gnb1	NA	0.05	42	Guanine nucleotide-binding protein G(I)/G(S)/G(T) subunit beta-1 (Transducin beta chain 1)
P50446	Krt6a Ker2 Krt2-6 Krt2-6a Krt6	0.21398,	0.05	35	Keratin, type II cytoskeletal 6A (Cytokeratin-6A) (CK-6A) (Keratin-6-alpha) (mK6-alpha) (Keratin-6A) (K6A)
P62631	Eef1a2 Eef1al Stn	0.21585,	0.05	31	Elongation factor 1-alpha 2 (EF-1-alpha-2) (Eukaryotic elongation factor 1 A-2) (eEF1A-2) (Statin-S1)
Q9CZ13	Uqcrc1	NA	0.05	17	Cytochrome b-c1 complex subunit 1, mitochondrial (Complex III subunit 1) (Core protein I) (Ubiquinol-cytochrome-c reductase complex core protein 1)
P60843	Eif4a1 Ddx2a Eif4a	NA	0.05	17	Eukaryotic initiation factor 4A-I (eIF-4A-I) (eIF4A-I) (EC 3.6.4.13) (ATP-dependent RNA helicase eIF4A-1)
P15626	Gstm2	NA	0.05	14	Glutathione S-transferase Mu 2 (EC 2.5.1.18) (GST 5-5) (GST class-mu 2) (Glutathione S-transferase pmGT2)
P62880	Gnb2	0.06343,	0.05	17	Guanine nucleotide-binding protein G(I)/G(S)/G(T) subunit beta-2 (G protein subunit beta-2) (Transducin beta chain 2)
P10649	Gstm1	0.02278,	0.05	13	Glutathione S-transferase Mu 1 (EC 2.5.1.18) (GST 1-1) (GST class-mu 1) (Glutathione S-transferase GT8.7) (pmGT10)
Q99LC3	Ndufa10	NA	0.05	14	NADH dehydrogenase [ubiquinone] 1 alpha subcomplex subunit 10, mitochondrial (Complex I-42kD) (CI-42kD) (NADH-ubiquinone oxidoreductase 42 kDa subunit)
P19639	Gstm3	0.02278,	0.05	11	Glutathione S-transferase Mu 3 (EC 2.5.1.18) (GST class-mu 3) (Glutathione S-transferase GT9.3)
Q62261	Sptbn1 Elf Spnb-2 Spnb2 Sptb2	NA	0.05	116	Spectrin beta chain, non-erythrocytic 1 (Beta-II spectrin) (Embryonic liver fodrin) (Fodrin beta chain)
Q68FD5	Cltc	0.30832,	0.05	92	Clathrin heavy chain 1
Q9JHU4	Dync1h1 Dhc1 Dnch1 Dnchc1 Dyhc	0.17468,0.04217,	0.05	73	Cytoplasmic dynein 1 heavy chain 1 (Cytoplasmic dynein heavy chain 1) (Dynein heavy chain, cytosolic)
Q9QXS1	Plec Plec1	0.60883,4.17752,	0.05	92	Plectin (PCN) (PLTN) (Plectin-1) (Plectin-6)
P49194	Rbp3	NA	0.05	67	Retinol-binding protein 3 (Interphotoreceptor retinoid-binding protein) (IRBP) (Interstitial retinol-binding protein)
Q8VDD5	Myh9	NA	0.05	58	Myosin-9 (Cellular myosin heavy chain, type A) (Myosin heavy chain 9) (Myosin heavy chain, non-muscle IIa) (Non-muscle myosin heavy chain A) (NMMHC-A) (Non-muscle myosin heavy chain IIa) (NMMHC II-a) (NMMHC-IIA)
P26039	Tln1 Tln	1.71884,0.72768,	0.05	66	Talin-1
Q921I1	Tf Trf	NA	0.05	66	Serotransferrin (Transferrin) (Beta-1 metal-binding globulin) (Siderophilin)
O08553	Dpysl2 Crmp2 Ulip2	0.12725,	0.05	67	Dihydropyrimidinase-related protein 2 (DRP-2) (Unc-33-like phosphoprotein 2) (ULIP-2)
P11499	Hsp90ab1 Hsp84 Hsp84-1 Hspcb	NA	0.05	54	Heat shock protein HSP 90-beta (Heat shock 84 kDa) (HSP 84) (HSP84) (Tumor-specific transplantation 84 kDa antigen) (TSTA)
Q8BTM8	Flna Fln Fln1	NA	0.05	53	Filamin-A (FLN-A) (Actin-binding protein 280) (ABP-280) (Alpha-filamin) (Endothelial actin-binding protein) (Filamin-1) (Non-muscle filamin)
P20443	Sag	NA	0.05	43	S-arrestin (48 kDa protein) (Retinal S-antigen) (S-AG) (Rod photoreceptor arrestin)
P10107	Anxa1 Anx1 Lpc-1 Lpc1	0.01539,	0.05	54	Annexin A1 (Annexin I) (Annexin-1) (Calpactin II) (Calpactin-2) (Chromobindin-9) (Lipocortin I) (Phospholipase A2 inhibitory protein) (p35)
Q02053	Uba1 Sbx Ube1 Ube1ax Ube1x	NA	0.05	42	Ubiquitin-like modifier-activating enzyme 1 (EC 6.2.1.45) (Ubiquitin-activating enzyme E1) (Ubiquitin-activating enzyme E1 X) (Ubiquitin-like modifier-activating enzyme 1 X)
P08113	Hsp90b1 Grp94 Tra-1 Tra1	NA	0.05	33	Endoplasmin (94 kDa glucose-regulated protein) (GRP-94) (Endoplasmic reticulum resident protein 99) (ERp99) (Heat shock protein 90 kDa beta member 1) (Polymorphic tumor rejection antigen 1) (Tumor rejection antigen gp96)
P07901	Hsp90aa1 Hsp86 Hsp86-1 Hspca	NA	0.05	46	Heat shock protein HSP 90-alpha (Heat shock 86 kDa) (HSP 86) (HSP86) (Tumor-specific transplantation 86 kDa antigen) (TSTA)
Q61879	Myh10	NA	0.05	27	Myosin-10 (Cellular myosin heavy chain, type B) (Myosin heavy chain 10) (Myosin heavy chain, non-muscle IIb) (Non-muscle myosin heavy chain B) (NMMHC-B) (Non-muscle myosin heavy chain IIb) (NMMHC II-b) (NMMHC-IIB)
O88990	Actn3	NA	0.05	30	Alpha-actinin-3 (Alpha-actinin skeletal muscle isoform 3) (F-actin cross-linking protein)
P01027	C3	NA	0.05	33	Complement C3 (HSE-MSF) [Cleaved into: Complement C3 beta chain; C3-beta-c (C3bc); Complement C3 alpha chain; C3a anaphylatoxin; Acylation stimulating protein (ASP) (C3adesArg); Complement C3b alpha' chain; Complement C3c alpha' chain fragment 1; Complement C3dg fragment; Complement C3g fragment; Complement C3d fragment; Complement C3f fragment; Complement C3c alpha' chain fragment 2]
Q04447	Ckb Ckbb	NA	0.05	44	Creatine kinase B-type (EC 2.7.3.2) (B-CK) (Creatine kinase B chain) (Creatine phosphokinase B-type) (CPK-B)
Q60597	Ogdh Kiaa4192	0.13437,0.07041,	0.05	40	2-oxoglutarate dehydrogenase, mitochondrial (EC 1.2.4.2) (2-oxoglutarate dehydrogenase complex component E1) (OGDC-E1) (Alpha-ketoglutarate dehydrogenase)
P19324	Serpinh1 Cbp1 Hsp47	0.57624,	0.05	41	Serpin H1 (47 kDa heat shock protein) (Collagen-binding protein) (Colligin) (Serine protease inhibitor J6)
P58252	Eef2	0.54671,	0.05	41	Elongation factor 2 (EF-2)
P50516	Atp6v1a Atp6a1 Atp6a2 Atp6v1a1	NA	0.05	33	V-type proton ATPase catalytic subunit A (V-ATPase subunit A) (EC 7.1.2.2) (V-ATPase 69 kDa subunit) (Vacuolar proton pump subunit alpha)
P27773	Pdia3 Erp Erp60 Grp58	0.37571,0.48905,	0.05	30	Protein disulfide-isomerase A3 (EC 5.3.4.1) (58 kDa glucose-regulated protein) (58 kDa microsomal protein) (p58) (Disulfide isomerase ER-60) (Endoplasmic reticulum resident protein 57) (ER protein 57) (ERp57) (Endoplasmic reticulum resident protein 60) (ER protein 60) (ERp60)
Q60932	Vdac1 Vdac5	NA	0.05	49	Voltage-dependent anion-selective channel protein 1 (VDAC-1) (mVDAC1) (Outer mitochondrial membrane protein porin 1) (Plasmalemmal porin) (Voltage-dependent anion-selective channel protein 5) (VDAC-5) (mVDAC5)
Q6P8J7	Ckmt2	0.0662,	0.05	24	Creatine kinase S-type, mitochondrial (EC 2.7.3.2) (Basic-type mitochondrial creatine kinase) (Mib-CK) (Sarcomeric mitochondrial creatine kinase) (S-MtCK)
Q01853	Vcp	NA	0.05	34	Transitional endoplasmic reticulum ATPase (TER ATPase) (EC 3.6.4.6) (15S Mg(2+)-ATPase p97 subunit) (Valosin-containing protein) (VCP)
O88569	Hnrnpa2b1 Hnrpa2b1	NA	0.05	26	Heterogeneous nuclear ribonucleoproteins A2/B1 (hnRNP A2/B1)
Q00898	Serpina1e Dom5 Spi1-5	NA	0.05	46	Alpha-1-antitrypsin 1-5 (Alpha-1 protease inhibitor 5) (Serine protease inhibitor 1-5) (Serine protease inhibitor A1e) (Serpin A1e)
Q8BMS1	Hadha	NA	0.05	29	Trifunctional enzyme subunit alpha, mitochondrial (TP-alpha) [Includes: Long-chain enoyl-CoA hydratase (EC 4.2.1.17); Long chain 3-hydroxyacyl-CoA dehydrogenase (EC 1.1.1.211)]
P70168	Kpnb1 Impnb	0.46963,	0.05	23	Importin subunit beta-1 (Karyopherin subunit beta-1) (Nuclear factor p97) (Pore targeting complex 97 kDa subunit) (PTAC97) (SCG)
Q02248	Ctnnb1 Catnb	0.14926,0.75444,	0.05	21	Catenin beta-1 (Beta-catenin)
P02088	Hbb-b1	0.1831,	0.05	38	Hemoglobin subunit beta-1 (Beta-1-globin) (Hemoglobin beta-1 chain) (Hemoglobin beta-major chain)
Q62188	Dpysl3 Drp3 Ulip	0.05144,	0.05	30	Dihydropyrimidinase-related protein 3 (DRP-3) (Unc-33-like phosphoprotein 1) (ULIP-1)
O55240	Rdh5 cRDH rdh RDH4	0.26369,	0.05	30	11-cis retinol dehydrogenase (11-cis RDH) (11-cis RoDH) (EC 1.1.1.315) (9-cis retinol dehydrogenase) (Cis-retinol dehydrogenase) (Retinol dehydrogenase 5)
P00329	Adh1 Adh-1	NA	0.05	34	Alcohol dehydrogenase 1 (EC 1.1.1.1) (ADH-A2) (Alcohol dehydrogenase A subunit)
Q80YX1	Tnc Hxb	5.40966,	0.05	21	Tenascin (TN) (Hexabrachion) (Tenascin-C) (TN-C)
P26040	Ezr Vil2	0.54199,	0.05	33	Ezrin (Cytovillin) (Villin-2) (p81)
P80314	Cct2 Cctb	NA	0.05	26	T-complex protein 1 subunit beta (TCP-1-beta) (CCT-beta)
P05064	Aldoa Aldo1	NA	0.05	61	Fructose-bisphosphate aldolase A (EC 4.1.2.13) (Aldolase 1) (Muscle-type aldolase)
P50396	Gdi1 Rabgdia	0.14908,	0.05	28	Rab GDP dissociation inhibitor alpha (Rab GDI alpha) (Guanosine diphosphate dissociation inhibitor 1) (GDI-1)
Q9DBG3	Ap2b1 Clapb1	NA	0.05	24	AP-2 complex subunit beta (AP105B) (Adaptor protein complex AP-2 subunit beta) (Adaptor-related protein complex 2 subunit beta) (Beta-2-adaptin) (Beta-adaptin) (Clathrin assembly protein complex 2 beta large chain) (Plasma membrane adaptor HA2/AP2 adaptin beta subunit)
Q64727	Vcl	NA	0.05	23	Vinculin (Metavinculin)
P07758	Serpina1a Dom1 Spi1-1	NA	0.05	38	Alpha-1-antitrypsin 1-1 (AAT) (Alpha-1 protease inhibitor 1) (Alpha-1-antiproteinase) (Serine protease inhibitor 1-1) (Serine protease inhibitor A1a) (Serpin A1a)
Q00896	Serpina1c Dom3 Dom6 Spi1-3 Spi1-6	NA	0.05	38	Alpha-1-antitrypsin 1-3 (Alpha-1 protease inhibitor 3) (Alpha-1 protease inhibitor 6) (Alpha-1-antitrypsin 1-6) (Serine protease inhibitor 1-3) (Serine protease inhibitor 1-6) (Serine protease inhibitor A1c) (Serpin A1c)
Q00897	Serpina1d Dom4 Spi1-4	NA	0.05	38	Alpha-1-antitrypsin 1-4 (Alpha-1 protease inhibitor 4) (Serine protease inhibitor 1-4) (Serine protease inhibitor A1d) (Serpin A1d)
O35678	Mgll	0.26715,	0.05	25	Monoglyceride lipase (MGL) (EC 3.1.1.23) (Monoacylglycerol lipase) (MAGL)
P07759	Serpina3k Mcm2 Spi2	0.022,	0.05	28	Serine protease inhibitor A3K (Serpin A3K) (Contrapsin) (SPI-2)
P15105	Glul Glns	NA	0.05	25	Glutamine synthetase (GS) (EC 6.3.1.2) (Glutamate--ammonia ligase) (Palmitoyltransferase GLUL) (EC 2.3.1.225)
P05201	Got1	0.32081,	0.05	24	Aspartate aminotransferase, cytoplasmic (cAspAT) (EC 2.6.1.1) (EC 2.6.1.3) (Cysteine aminotransferase, cytoplasmic) (Cysteine transaminase, cytoplasmic) (cCAT) (Glutamate oxaloacetate transaminase 1) (Transaminase A)
P22599	Serpina1b Aat2 Dom2 Spi1-2	NA	0.05	37	Alpha-1-antitrypsin 1-2 (AAT) (Alpha-1 protease inhibitor 2) (Alpha-1-antiproteinase) (Serine protease inhibitor 1-2) (Serine protease inhibitor A1b) (Serpin A1b)
Q8BWT1	Acaa2	NA	0.05	24	3-ketoacyl-CoA thiolase, mitochondrial (EC 2.3.1.16) (Acetyl-CoA acyltransferase) (Beta-ketothiolase) (Mitochondrial 3-oxoacyl-CoA thiolase)
P14211	Calr	NA	0.05	29	Calreticulin (CRP55) (Calregulin) (Endoplasmic reticulum resident protein 60) (ERp60) (HACBP)
P21614	Gc	NA	0.05	24	Vitamin D-binding protein (DBP) (VDB) (Gc-globulin) (Group-specific component)
P24549	Aldh1a1 Ahd-2 Ahd2 Aldh1	NA	0.05	30	Retinal dehydrogenase 1 (RALDH 1) (RalDH1) (EC 1.2.1.-) (EC 1.2.1.36) (ALDH-E1) (ALHDII) (Aldehyde dehydrogenase family 1 member A1) (Aldehyde dehydrogenase, cytosolic)
P62259	Ywhae	0.27706,	0.05	22	14-3-3 protein epsilon (14-3-3E)
O08709	Prdx6 Aop2 Ltw4 Prdx5	NA	0.05	21	Peroxiredoxin-6 (EC 1.11.1.15) (1-Cys peroxiredoxin) (1-Cys PRX) (Acidic calcium-independent phospholipase A2) (aiPLA2) (EC 3.1.1.4) (Antioxidant protein 2) (Non-selenium glutathione peroxidase) (NSGPx)
P10493	Nid1 Ent	NA	0.05	18	Nidogen-1 (NID-1) (Entactin)
P68040	Rack1 Gnb2-rs1 Gnb2l1	NA	0.05	19	Receptor of activated protein C kinase 1 (12-3) (Guanine nucleotide-binding protein subunit beta-2-like 1) (Receptor for activated C kinase) (Receptor of activated protein kinase C 1) (p205) [Cleaved into: Receptor of activated protein C kinase 1, N-terminally processed (Guanine nucleotide-binding protein subunit beta-2-like 1, N-terminally processed)]
Q6ZQ38	Cand1 D10Ertd516e Kiaa0829	NA	0.05	19	Cullin-associated NEDD8-dissociated protein 1 (Cullin-associated and neddylation-dissociated protein 1) (p120 CAND1)
P63038	Hspd1 Hsp60	NA	0.05	17	60 kDa heat shock protein, mitochondrial (EC 3.6.4.9) (60 kDa chaperonin) (Chaperonin 60) (CPN60) (HSP-65) (Heat shock protein 60) (HSP-60) (Hsp60) (Mitochondrial matrix protein P1)
P17710	Hk1	2.42379,	0.05	15	Hexokinase-1 (EC 2.7.1.1) (Hexokinase type I) (HK I) (Hexokinase, tumor isozyme)
Q91VD9	Ndufs1	NA	0.05	16	NADH-ubiquinone oxidoreductase 75 kDa subunit, mitochondrial (EC 1.6.99.3) (EC 7.1.1.2) (Complex I-75kD) (CI-75kD)
P28665	Mug1 Mug-1	1.58978,	0.05	19	Murinoglobulin-1 (MuG1)
P07744	Krt4 Krt2-4	0.20905,	0.05	25	Keratin, type II cytoskeletal 4 (Cytokeratin-4) (CK-4) (Cytoskeletal 57 kDa keratin) (Keratin-4) (K4) (Type-II keratin Kb4)
P17751	Tpi1 Tpi	NA	0.05	20	Triosephosphate isomerase (TIM) (EC 5.3.1.1) (Methylglyoxal synthase) (EC 4.2.3.3) (Triose-phosphate isomerase)
Q9DBJ1	Pgam1	NA	0.05	17	Phosphoglycerate mutase 1 (EC 5.4.2.11) (EC 5.4.2.4) (BPG-dependent PGAM 1) (Phosphoglycerate mutase isozyme B) (PGAM-B)
Q8VDM4	Psmd2	0.01291,	0.05	14	26S proteasome non-ATPase regulatory subunit 2 (26S proteasome regulatory subunit RPN1) (26S proteasome regulatory subunit S2) (26S proteasome subunit p97)
P14206	Rpsa Lamr1 P40-8	0.07787,	0.05	14	40S ribosomal protein SA (37 kDa laminin receptor precursor) (37LRP) (37 kDa oncofetal antigen) (37/67 kDa laminin receptor) (LRP/LR) (67 kDa laminin receptor) (67LR) (Laminin receptor 1) (LamR) (Laminin-binding protein precursor p40) (LBP/p40) (OFA/iLRP)
P19096	Fasn	NA	0.05	19	Fatty acid synthase (EC 2.3.1.85) [Includes: [Acyl-carrier-protein] S-acetyltransferase (EC 2.3.1.38); [Acyl-carrier-protein] S-malonyltransferase (EC 2.3.1.39); 3-oxoacyl-[acyl-carrier-protein] synthase (EC 2.3.1.41); 3-oxoacyl-[acyl-carrier-protein] reductase (EC 1.1.1.100); 3-hydroxyacyl-[acyl-carrier-protein] dehydratase (EC 4.2.1.59); Enoyl-[acyl-carrier-protein] reductase (EC 1.3.1.39); Ole…
Q8R0W0	Eppk1 EPPK	NA	0.05	17	Epiplakin
P50544	Acadvl Vlcad	0.13799,	0.05	18	Very long-chain specific acyl-CoA dehydrogenase, mitochondrial (EC 1.3.8.9) (MVLCAD) (VLCAD)
P26443	Glud1 Glud	NA	0.05	24	Glutamate dehydrogenase 1, mitochondrial (GDH 1) (EC 1.4.1.3)
P16015	Ca3 Car3	NA	0.05	12	Carbonic anhydrase 3 (EC 4.2.1.1) (Carbonate dehydratase III) (Carbonic anhydrase III) (CA-III)
Q8VEK3	Hnrnpu Hnrpu	NA	0.05	17	Heterogeneous nuclear ribonucleoprotein U (hnRNP U) (Scaffold-attachment factor A) (SAF-A)
P97807	Fh Fh1	NA	0.05	15	Fumarate hydratase, mitochondrial (Fumarase) (EC 4.2.1.2) (EF-3)
Q78PY7	Snd1	NA	0.05	15	Staphylococcal nuclease domain-containing protein 1 (EC 3.1.31.1) (100 kDa coactivator) (p100 co-activator)
P14152	Mdh1 Mor2	0.34353,	0.05	20	Malate dehydrogenase, cytoplasmic (EC 1.1.1.37) (Cytosolic malate dehydrogenase)
P26043	Rdx	NA	0.05	24	Radixin (ESP10)
Q91VI7	Rnh1 Rnh	NA	0.05	15	Ribonuclease inhibitor (Ribonuclease/angiogenin inhibitor 1)
P27659	Rpl3	NA	0.05	15	60S ribosomal protein L3 (J1 protein)
Q9D8E6	Rpl4	NA	0.05	14	60S ribosomal protein L4
Q9QZ47	Tnnt3	0.01759,	0.05	22	Troponin T, fast skeletal muscle (TnTf) (Fast skeletal muscle troponin T) (fTnT)
P51150	Rab7a Rab7	0.05173,	0.05	23	Ras-related protein Rab-7a
Q8K2B3	Sdha	0.68376,	0.05	18	Succinate dehydrogenase [ubiquinone] flavoprotein subunit, mitochondrial (EC 1.3.5.1) (Flavoprotein subunit of complex II) (Fp)
O70318	Epb41l2 Epb4.1l2	NA	0.05	21	Band 4.1-like protein 2 (Generally expressed protein 4.1) (4.1G)
Q9D0K2	Oxct1 Oxct Scot	NA	0.05	23	Succinyl-CoA:3-ketoacid coenzyme A transferase 1, mitochondrial (EC 2.8.3.5) (3-oxoacid CoA-transferase 1) (Somatic-type succinyl-CoA:3-oxoacid CoA-transferase) (SCOT-s)
P14602	Hspb1 Hsp25 Hsp27	NA	0.05	17	Heat shock protein beta-1 (HspB1) (Growth-related 25 kDa protein) (Heat shock 25 kDa protein) (HSP 25) (Heat shock 27 kDa protein) (HSP 27) (p25)
Q9ET01	Pygl	NA	0.05	10	Glycogen phosphorylase, liver form (EC 2.4.1.1)
P19157	Gstp1 Gstpib	2.0629,	0.05	23	Glutathione S-transferase P 1 (Gst P1) (EC 2.5.1.18) (GST YF-YF) (GST class-pi) (GST-piB) (Preadipocyte growth factor)
P63101	Ywhaz	NA	0.05	15	14-3-3 protein zeta/delta (Protein kinase C inhibitor protein 1) (KCIP-1) (SEZ-2)
P18760	Cfl1	0.03013,	0.05	18	Cofilin-1 (Cofilin, non-muscle isoform)
O35643	Ap1b1 Adtb1	NA	0.05	12	AP-1 complex subunit beta-1 (Adaptor protein complex AP-1 subunit beta-1) (Adaptor-related protein complex 1 subunit beta-1) (Beta-1-adaptin) (Beta-adaptin 1) (Clathrin assembly protein complex 1 beta large chain) (Golgi adaptor HA1/AP1 adaptin beta subunit)
P99029	Prdx5 Prdx6	NA	0.05	11	Peroxiredoxin-5, mitochondrial (EC 1.11.1.15) (Antioxidant enzyme B166) (AOEB166) (Liver tissue 2D-page spot 2D-0014IV) (PLP) (Peroxiredoxin V) (Prx-V) (Peroxisomal antioxidant enzyme) (Thioredoxin peroxidase PMP20)
P24527	Lta4h	NA	0.05	16	Leukotriene A-4 hydrolase (LTA-4 hydrolase) (EC 3.3.2.6) (Leukotriene A(4) hydrolase)
Q9QYC0	Add1	NA	0.05	11	Alpha-adducin (Erythrocyte adducin subunit alpha)
P49312	Hnrnpa1 Fli-2 Hnrpa1 Tis	NA	0.05	11	Heterogeneous nuclear ribonucleoprotein A1 (hnRNP A1) (HDP-1) (Helix-destabilizing protein) (Single-strand-binding protein) (Topoisomerase-inhibitor suppressed) (hnRNP core protein A1) [Cleaved into: Heterogeneous nuclear ribonucleoprotein A1, N-terminally processed]
Q9DB77	Uqcrc2	NA	0.05	19	Cytochrome b-c1 complex subunit 2, mitochondrial (Complex III subunit 2) (Core protein II) (Ubiquinol-cytochrome-c reductase complex core protein 2)
P23440	Pde6b Mpb Pdeb rd	NA	0.05	14	Rod cGMP-specific 3',5'-cyclic phosphodiesterase subunit beta (GMP-PDE beta) (EC 3.1.4.35)
P38647	Hspa9 Grp75 Hsp74 Hspa9a	NA	0.05	18	Stress-70 protein, mitochondrial (75 kDa glucose-regulated protein) (GRP-75) (Heat shock 70 kDa protein 9) (Mortalin) (Peptide-binding protein 74) (PBP74) (p66 MOT)
P17427	Ap2a2 Adtab	NA	0.05	11	AP-2 complex subunit alpha-2 (100 kDa coated vesicle protein C) (Adaptor protein complex AP-2 subunit alpha-2) (Adaptor-related protein complex 2 subunit alpha-2) (Alpha-adaptin C) (Alpha2-adaptin) (Clathrin assembly protein complex 2 alpha-C large chain) (Plasma membrane adaptor HA2/AP2 adaptin alpha C subunit)
Q9EQ06	Hsd17b11 Dhrs8 Pan1b	NA	0.05	17	Estradiol 17-beta-dehydrogenase 11 (EC 1.1.1.62) (17-beta-hydroxysteroid dehydrogenase 11) (17-beta-HSD 11) (17bHSD11) (17betaHSD11) (17-beta-hydroxysteroid dehydrogenase XI) (17-beta-HSD XI) (17betaHSDXI) (Dehydrogenase/reductase SDR family member 8)
P68254	Ywhaq	NA	0.05	11	14-3-3 protein theta (14-3-3 protein tau)
P17742	Ppia	NA	0.05	19	Peptidyl-prolyl cis-trans isomerase A (PPIase A) (EC 5.2.1.8) (Cyclophilin A) (Cyclosporin A-binding protein) (Rotamase A) (SP18) [Cleaved into: Peptidyl-prolyl cis-trans isomerase A, N-terminally processed]
P17156	Hspa2 Hcp70.2 Hsp70-2	NA	0.05	14	Heat shock-related 70 kDa protein 2 (Heat shock protein 70.2)
P61164	Actr1a Ctrn1	3.67016,	0.05	14	Alpha-centractin (Centractin) (ARP1) (Actin-RPV) (Centrosome-associated actin homolog)
P80315	Cct4 Cctd	NA	0.05	11	T-complex protein 1 subunit delta (TCP-1-delta) (A45) (CCT-delta)
O70456	Sfn Mkrn3	NA	0.05	15	14-3-3 protein sigma (Stratifin)
Q91ZJ5	Ugp2	0.10502,0.02331,	0.05	12	UTP--glucose-1-phosphate uridylyltransferase (EC 2.7.7.9) (UDP-glucose pyrophosphorylase) (UDPGP) (UGPase)
O08599	Stxbp1	NA	0.05	12	Syntaxin-binding protein 1 (Protein unc-18 homolog 1) (Unc18-1) (Protein unc-18 homolog A) (Unc-18A)
P54071	Idh2	NA	0.05	9	Isocitrate dehydrogenase [NADP], mitochondrial (IDH) (EC 1.1.1.42) (ICD-M) (IDP) (NADP(+)-specific ICDH) (Oxalosuccinate decarboxylase)
P13595	Ncam1 Ncam	NA	0.05	18	Neural cell adhesion molecule 1 (N-CAM-1) (NCAM-1) (CD antigen CD56)
Q61425	Hadh Hadhsc Mschad Schad	NA	0.05	15	Hydroxyacyl-coenzyme A dehydrogenase, mitochondrial (HCDH) (EC 1.1.1.35) (Medium and short-chain L-3-hydroxyacyl-coenzyme A dehydrogenase) (Short-chain 3-hydroxyacyl-CoA dehydrogenase)
Q9JKS4	Ldb3 Kiaa0613	0.34466,	0.05	8	LIM domain-binding protein 3 (Protein cypher) (Protein oracle) (Z-band alternatively spliced PDZ-motif protein)
P41216	Acsl1 Acsl2 Facl2	NA	0.05	9	Long-chain-fatty-acid--CoA ligase 1 (EC 6.2.1.3) (Long-chain acyl-CoA synthetase 1) (LACS 1)
Q64518	Atp2a3	NA	0.05	18	Sarcoplasmic/endoplasmic reticulum calcium ATPase 3 (SERCA3) (SR Ca(2+)-ATPase 3) (EC 3.6.3.8) (Calcium pump 3)
Q99KK7	Dpp3	0.04518,	0.05	11	Dipeptidyl peptidase 3 (EC 3.4.14.4) (Dipeptidyl aminopeptidase III) (Dipeptidyl arylamidase III) (Dipeptidyl peptidase III) (DPP III) (Enkephalinase B)
P28271	Aco1 Ireb1 Irebp	NA	0.05	10	Cytoplasmic aconitate hydratase (Aconitase) (EC 4.2.1.3) (Citrate hydro-lyase) (Iron regulatory protein 1) (IRP1) (Iron-responsive element-binding protein 1) (IRE-BP 1)
P61982	Ywhag	NA	0.05	10	14-3-3 protein gamma [Cleaved into: 14-3-3 protein gamma, N-terminally processed]
P84084	Arf5	NA	0.05	11	ADP-ribosylation factor 5
P61205	Arf3	NA	0.05	12	ADP-ribosylation factor 3
P84078	Arf1	NA	0.05	12	ADP-ribosylation factor 1
P61750	Arf4	NA	0.05	11	ADP-ribosylation factor 4
Q8BSL7	Arf2	NA	0.05	12	ADP-ribosylation factor 2
Q9CQV8	Ywhab	NA	0.05	12	14-3-3 protein beta/alpha (Protein kinase C inhibitor protein 1) (KCIP-1) [Cleaved into: 14-3-3 protein beta/alpha, N-terminally processed]
Q9DCD0	Pgd	NA	0.05	10	6-phosphogluconate dehydrogenase, decarboxylating (EC 1.1.1.44)
P62702	Rps4x Rps4	NA	0.05	10	40S ribosomal protein S4, X isoform
P00920	Ca2 Car2	NA	0.05	10	Carbonic anhydrase 2 (EC 4.2.1.1) (Carbonate dehydratase II) (Carbonic anhydrase II) (CA-II)
O08749	Dld	NA	0.05	11	Dihydrolipoyl dehydrogenase, mitochondrial (EC 1.8.1.4) (Dihydrolipoamide dehydrogenase)
Q91YT0	Ndufv1	NA	0.05	12	NADH dehydrogenase [ubiquinone] flavoprotein 1, mitochondrial (EC 1.6.99.3) (EC 7.1.1.2) (Complex I-51kD) (CI-51kD) (NADH-ubiquinone oxidoreductase 51 kDa subunit)
P61922	Abat Gabat	NA	0.05	12	4-aminobutyrate aminotransferase, mitochondrial (EC 2.6.1.19) ((S)-3-amino-2-methylpropionate transaminase) (EC 2.6.1.22) (GABA aminotransferase) (GABA-AT) (Gamma-amino-N-butyrate transaminase) (GABA transaminase) (GABA-T) (L-AIBAT)
P16125	Ldhb Ldh-2 Ldh2	NA	0.05	9	L-lactate dehydrogenase B chain (LDH-B) (EC 1.1.1.27) (LDH heart subunit) (LDH-H)
O70503	Hsd17b12 Kik1	NA	0.05	8	Very-long-chain 3-oxoacyl-CoA reductase (EC 1.1.1.330) (17-beta-hydroxysteroid dehydrogenase 12) (17-beta-HSD 12) (3-ketoacyl-CoA reductase) (KAR) (Estradiol 17-beta-dehydrogenase 12) (EC 1.1.1.62) (KIK-I)
Q8VIJ6	Sfpq Psf	NA	0.05	14	Splicing factor, proline- and glutamine-rich (DNA-binding p52/p100 complex, 100 kDa subunit) (Polypyrimidine tract-binding protein-associated-splicing factor) (PSF) (PTB-associated-splicing factor)
P24472	Gsta4 Gsta	0.06536,	0.05	15	Glutathione S-transferase A4 (EC 2.5.1.18) (GST A4-4) (GSTA4-4) (GST class-alpha member 4) (Glutathione S-transferase 5.7) (GST 5.7)
P08752	Gnai2 Gnai-2	NA	0.05	9	Guanine nucleotide-binding protein G(i) subunit alpha-2 (Adenylate cyclase-inhibiting G alpha protein)
Q63844	Mapk3 Erk1 Prkm3	NA	0.05	8	Mitogen-activated protein kinase 3 (MAP kinase 3) (MAPK 3) (EC 2.7.11.24) (ERT2) (Extracellular signal-regulated kinase 1) (ERK-1) (Insulin-stimulated MAP2 kinase) (MAP kinase isoform p44) (p44-MAPK) (MNK1) (Microtubule-associated protein 2 kinase) (p44-ERK1)
P46935	Nedd4 Kiaa0093 Nedd-4 Nedd4-1 Nedd4a	NA	0.05	8	E3 ubiquitin-protein ligase NEDD4 (EC 2.3.2.26) (HECT-type E3 ubiquitin transferase NEDD4) (Neural precursor cell expressed developmentally down-regulated protein 4) (NEDD-4)
P28666	Mug2 Mug-2	NA	0.05	11	Murinoglobulin-2 (MuG2)
P80316	Cct5 Ccte Kiaa0098	NA	0.05	8	T-complex protein 1 subunit epsilon (TCP-1-epsilon) (CCT-epsilon)
Q8R5C5	Actr1b	NA	0.05	6	Beta-centractin (Actin-related protein 1B) (ARP1B)
Q5FWK3	Arhgap1	NA	0.05	9	Rho GTPase-activating protein 1 (Rho-type GTPase-activating protein 1)
Q9CR62	Slc25a11	0.02109,	0.05	6	Mitochondrial 2-oxoglutarate/malate carrier protein (OGCP) (Solute carrier family 25 member 11)
P02089	Hbb-b2	NA	0.05	8	Hemoglobin subunit beta-2 (Beta-2-globin) (Hemoglobin beta-2 chain) (Hemoglobin beta-minor chain)
P28650	Adssl1 Adss1	NA	0.05	7	Adenylosuccinate synthetase isozyme 1 (AMPSase 1) (AdSS 1) (EC 6.3.4.4) (Adenylosuccinate synthetase, basic isozyme) (Adenylosuccinate synthetase, muscle isozyme) (M-type adenylosuccinate synthetase) (IMP--aspartate ligase 1)
Q80TB8	Vat1l Kiaa1576	NA	0.05	7	Synaptic vesicle membrane protein VAT-1 homolog-like (EC 1.-.-.-)
Q9Z2I8	Suclg2	NA	0.05	10	Succinate--CoA ligase [GDP-forming] subunit beta, mitochondrial (EC 6.2.1.4) (GTP-specific succinyl-CoA synthetase subunit beta) (G-SCS) (GTPSCS) (Succinyl-CoA synthetase beta-G chain) (SCS-betaG)
Q61595	Ktn1	0.0351,	0.05	8	Kinectin
Q9DCL9	Paics	NA	0.05	5	Multifunctional protein ADE2 [Includes: Phosphoribosylaminoimidazole-succinocarboxamide synthase (EC 6.3.2.6) (SAICAR synthetase); Phosphoribosylaminoimidazole carboxylase (EC 4.1.1.21) (AIR carboxylase) (AIRC)]
P49722	Psma2 Lmpc3	NA	0.05	6	Proteasome subunit alpha type-2 (EC 3.4.25.1) (Macropain subunit C3) (Multicatalytic endopeptidase complex subunit C3) (Proteasome component C3)
Q8BFR5	Tufm	NA	0.05	4	Elongation factor Tu, mitochondrial
Q9DC51	Gnai3	NA	0.05	5	Guanine nucleotide-binding protein G(k) subunit alpha (G(i) alpha-3)
Q99MN9	Pccb	0.052,	0.05	5	Propionyl-CoA carboxylase beta chain, mitochondrial (PCCase subunit beta) (EC 6.4.1.3) (Propanoyl-CoA:carbon dioxide ligase subunit beta)
Q64521	Gpd2 Gdm1	NA	0.05	4	Glycerol-3-phosphate dehydrogenase, mitochondrial (GPD-M) (GPDH-M) (EC 1.1.5.3) (Protein TISP38)
Q60668	Hnrnpd Auf1 Hnrpd	0.0091,	0.05	3	Heterogeneous nuclear ribonucleoprotein D0 (hnRNP D0) (AU-rich element RNA-binding protein 1)
O35343	Kpna4 Qip1	0.01082,	0.05	2	Importin subunit alpha-3 (Importin alpha Q1) (Qip1) (Karyopherin subunit alpha-4)
O88346	Tnnt1	0.01759,	0.05	1	Troponin T, slow skeletal muscle (TnTs) (Slow skeletal muscle troponin T) (sTnT)
P28653	Bgn	0.05778,0.08004,0.06156,0.06156,0.05327,0.0626,	0.06	74	Biglycan (Bone/cartilage proteoglycan I) (PG-S1)
P08249	Mdh2 Mor1	0.04783,0.06066,0.05997,0.06171,	0.06	40	Malate dehydrogenase, mitochondrial (EC 1.1.1.37)
P17879	Hspa1b Hcp70.1 Hsp70-1 Hsp70a1 Hspa1	8.41925,0.67001,	0.06	43	Heat shock 70 kDa protein 1B (Heat shock 70 kDa protein 1) (HSP70.1)
P21107	Tpm3 Tpm-5 Tpm5	NA	0.06	10	Tropomyosin alpha-3 chain (Gamma-tropomyosin) (Tropomyosin-3)
Q64467	Gapdhs Gapd-s Gapds	0.06022,	0.06	6	Glyceraldehyde-3-phosphate dehydrogenase, testis-specific (EC 1.2.1.12) (Spermatogenic cell-specific glyceraldehyde 3-phosphate dehydrogenase 2) (GAPDH-2) (Spermatogenic glyceraldehyde-3-phosphate dehydrogenase)
P09405	Ncl Nuc	NA	0.06	11	Nucleolin (Protein C23)
O08529	Capn2	NA	0.06	13	Calpain-2 catalytic subunit (EC 3.4.22.53) (80 kDa M-calpain subunit) (CALP80) (Calcium-activated neutral proteinase 2) (CANP 2) (Calpain M-type) (Calpain-2 large subunit) (Millimolar-calpain) (M-calpain)
Q921F2	Tardbp Tdp43	1.14801,	0.06	13	TAR DNA-binding protein 43 (TDP-43)
Q9D0F9	Pgm1 Pgm2	NA	0.06	8	Phosphoglucomutase-1 (PGM 1) (EC 5.4.2.2) (Glucose phosphomutase 1) (Phosphoglucomutase-2)
E9Q557	Dsp	0.11004,0.18415,0.5333,	0.07	82	Desmoplakin (DP)
Q9CQQ7	Atp5pb Atp5f1	0.0665,	0.07	8	ATP synthase F(0) complex subunit B1, mitochondrial (ATP synthase peripheral stalk-membrane subunit b) (ATP synthase subunit b) (ATPase subunit b)
Q3V132	Slc25a31 Aac4 Ant4 Sfec	0.07349,	0.07	6	ADP/ATP translocase 4 (ADP,ATP carrier protein 4) (Adenine nucleotide translocator 4) (ANT 4) (Solute carrier family 25 member 31) (Sperm flagellar energy carrier protein)
Q9JKF1	Iqgap1	3.09725,	0.07	36	Ras GTPase-activating-like protein IQGAP1
P26231	Ctnna1 Catna1	NA	0.07	35	Catenin alpha-1 (102 kDa cadherin-associated protein) (Alpha E-catenin) (CAP102)
P14824	Anxa6 Anx6	0.86452,	0.07	23	Annexin A6 (67 kDa calelectrin) (Annexin VI) (Annexin-6) (Calphobindin-II) (CPB-II) (Chromobindin-20) (Lipocortin VI) (Protein III) (p68) (p70)
P05063	Aldoc Aldo3 Scrg2	0.01167,	0.07	14	Fructose-bisphosphate aldolase C (EC 4.1.2.13) (Aldolase 3) (Brain-type aldolase) (Scrapie-responsive protein 2) (Zebrin II)
Q9DCX2	Atp5pd Atp5h	NA	0.07	6	ATP synthase subunit d, mitochondrial (ATPase subunit d) (ATP synthase peripheral stalk subunit d)
A2AQP0	Myh7b	0.15185,	0.07	9	Myosin-7B (Myosin cardiac muscle beta chain) (Myosin heavy chain 7B, cardiac muscle beta isoform)
Q03734	Serpina3m	NA	0.07	8	Serine protease inhibitor A3M (Serpin A3M)
P63094	Gnas Gnas1 MNCb-5546	0.06803,	0.07	7	Guanine nucleotide-binding protein G(s) subunit alpha isoforms short (Adenylate cyclase-stimulating G alpha protein)
Q6R0H6	Gnas Gnas1	0.06803,	0.07	7	Protein ALEX (Alternative gene product encoded by XL-exon)
Q6R0H7	Gnas Gnas1	0.06803,	0.07	7	Guanine nucleotide-binding protein G(s) subunit alpha isoforms XLas (Adenylate cyclase-stimulating G alpha protein) (Extra large alphas protein) (XLalphas)
P08030	Aprt	0.07252,	0.07	2	Adenine phosphoribosyltransferase (APRT) (EC 2.4.2.7)
P58774	Tpm2 Tpm-2	0.06679,	0.08	12	Tropomyosin beta chain (Beta-tropomyosin) (Tropomyosin-2)
P20029	Hspa5 Grp78	0.35277,	0.08	48	Endoplasmic reticulum chaperone BiP (EC 3.6.4.10) (78 kDa glucose-regulated protein) (GRP-78) (Binding-immunoglobulin protein) (BiP) (Heat shock protein 70 family protein 5) (HSP70 family protein 5) (Heat shock protein family A member 5) (Immunoglobulin heavy chain-binding protein)
P21981	Tgm2	0.62909,	0.08	24	Protein-glutamine gamma-glutamyltransferase 2 (EC 2.3.2.13) (Tissue transglutaminase) (Transglutaminase C) (TG(C)) (TGC) (TGase C) (Transglutaminase-2) (TGase-2)
P68372	Tubb4b Tubb2c	0.14544,0.14544,0.04886,0.68051,0.06018,0.07076,0.0656,0.13919,0.19446,0.11156,0.186,0.11605,0.11061,	0.09	120	Tubulin beta-4B chain (Tubulin beta-2C chain)
P99024	Tubb5	0.06641,0.09151,0.04886,0.06018,0.07076,0.0656,0.13919,0.11156,0.09334,0.11605,0.11061,	0.09	117	Tubulin beta-5 chain
Q9D6F9	Tubb4a Tubb4	0.06018,0.07076,0.0656,0.13919,0.19446,0.11156,0.186,0.11605,0.11061,	0.09	109	Tubulin beta-4A chain (Tubulin beta-4 chain)
Q9ERD7	Tubb3	0.09151,0.04886,0.68051,0.13919,0.186,0.11605,0.09638,0.08667,0.11061,	0.09	51	Tubulin beta-3 chain
P97298	Serpinf1 Pedf Sdf3	0.84403,0.52821,	0.09	20	Pigment epithelium-derived factor (PEDF) (Caspin) (Serpin F1) (Stromal cell-derived factor 3) (SDF-3)
Q9DCS2	Mettl26	0.09383,	0.09	2	Methyltransferase-like 26
P97443	Smyd1 Bop	0.08515,	0.09	1	Histone-lysine N-methyltransferase Smyd1 (EC 2.1.1.43) (CD8b-opposite) (SET and MYND domain-containing protein 1) (Zinc finger protein BOP) (m-BOP)
Q9CWF2	Tubb2b	0.09151,0.04886,0.68051,0.07076,0.0656,0.13919,0.19446,0.11156,0.11605,0.11061,	0.1	91	Tubulin beta-2B chain
Q62465	Vat1 Vat-1	0.10049,0.13025,0.12188,0.14158,	0.1	38	Synaptic vesicle membrane protein VAT-1 homolog (EC 1.-.-.-)
Q8BKC5	Ipo5 Kpnb3 Ranbp5	NA	0.1	18	Importin-5 (Imp5) (Importin subunit beta-3) (Karyopherin beta-3) (Ran-binding protein 5) (RanBP5)
Q9R0G6	Comp	0.09543,	0.1	1	Cartilage oligomeric matrix protein (COMP)
P13020	Gsn Gsb	0.11648,0.18731,	0.1	33	Gelsolin (Actin-depolymerizing factor) (ADF) (Brevin)
Q9CWJ9	Atic Purh	NA	0.1	17	Bifunctional purine biosynthesis protein PURH [Includes: Phosphoribosylaminoimidazolecarboxamide formyltransferase (EC 2.1.2.3) (5-aminoimidazole-4-carboxamide ribonucleotide formyltransferase) (AICAR transformylase); IMP cyclohydrolase (EC 3.5.4.10) (ATIC) (IMP synthase) (Inosinicase)]
P16627	Hspa1l Hsc70t	0.67001,	0.1	12	Heat shock 70 kDa protein 1-like (Heat shock 70 kDa protein 1L) (Heat shock 70 kDa-like protein 1) (Spermatid-specific heat shock protein 70)
O08788	Dctn1	0.09617,	0.1	7	Dynactin subunit 1 (150 kDa dynein-associated polypeptide) (DAP-150) (DP-150) (p150-glued)
Q923B6	Steap4 Tiarp	0.09916,	0.1	3	Metalloreductase STEAP4 (EC 1.16.1.9) (Dudulin-4) (Six-transmembrane epithelial antigen of prostate 4) (Tumor necrosis factor-alpha-induced adipose-related protein)
Q6ZWR4	Ppp2r2b	0.10445,	0.1	1	Serine/threonine-protein phosphatase 2A 55 kDa regulatory subunit B beta isoform (PP2A subunit B isoform B55-beta) (PP2A subunit B isoform PR55-beta) (PP2A subunit B isoform R2-beta) (PP2A subunit B isoform beta)
Q6P1F6	Ppp2r2a	0.10445,	0.1	1	Serine/threonine-protein phosphatase 2A 55 kDa regulatory subunit B alpha isoform (PP2A subunit B isoform B55-alpha) (PP2A subunit B isoform PR55-alpha) (PP2A subunit B isoform R2-alpha) (PP2A subunit B isoform alpha)
Q925E7	Ppp2r2d D7Ertd753e Kiaa1541	0.10445,	0.1	1	Serine/threonine-protein phosphatase 2A 55 kDa regulatory subunit B delta isoform (PP2A subunit B isoform B55-delta) (PP2A subunit B isoform PR55-delta) (PP2A subunit B isoform R2-delta) (PP2A subunit B isoform delta)
Q05793	Hspg2	0.32595,1.07894,0.09407,	0.11	98	Basement membrane-specific heparan sulfate proteoglycan core protein (HSPG) [Cleaved into: Endorepellin; LG3 peptide]
Q7TMM9	Tubb2a Tubb2	0.09151,0.04886,0.68051,0.07076,0.0656,0.13919,0.19446,0.11156,0.11605,0.11061,	0.11	91	Tubulin beta-2A chain
P58771	Tpm1 Tpm-1 Tpma	0.13139,	0.11	18	Tropomyosin alpha-1 chain (Alpha-tropomyosin) (Tropomyosin-1)
P10630	Eif4a2 Ddx2b	NA	0.11	18	Eukaryotic initiation factor 4A-II (eIF-4A-II) (eIF4A-II) (EC 3.6.4.13) (ATP-dependent RNA helicase eIF4A-2)
Q9D1A2	Cndp2 Cn2	0.21621,	0.11	16	Cytosolic non-specific dipeptidase (EC 3.4.13.18) (CNDP dipeptidase 2) (Glutamate carboxypeptidase-like protein 1)
Q9WTI7	Myo1c	0.11439,	0.11	7	Unconventional myosin-Ic (Myosin I beta) (MMI-beta) (MMIb)
Q99K70	Rragc	0.11425,	0.11	3	Ras-related GTP-binding protein C (Rag C) (RagC) (GTPase-interacting protein 2) (TIB929)
O35129	Phb2 Bap Bcap37 Rea	NA	0.12	6	Prohibitin-2 (B-cell receptor-associated protein BAP37) (Repressor of estrogen receptor activity)
Q9DB05	Napa Snapa	NA	0.13	14	Alpha-soluble NSF attachment protein (SNAP-alpha) (N-ethylmaleimide-sensitive factor attachment protein alpha)
Q922F4	Tubb6	0.04886,0.68051,0.13919,0.186,0.11605,	0.14	32	Tubulin beta-6 chain
A2AQ07	Tubb1	0.13919,	0.14	8	Tubulin beta-1 chain
P97457	Mylpf	0.15153,0.13316,0.1548,0.18939,	0.15	42	Myosin regulatory light chain 2, skeletal muscle isoform (Fast skeletal myosin light chain 2) (MLC2F)
Q99K41	Emilin1	0.15469,	0.15	10	EMILIN-1 (Elastin microfibril interface-located protein 1) (Elastin microfibril interfacer 1)
P56399	Usp5 Isot	3.60953,0.7357,	0.15	19	Ubiquitin carboxyl-terminal hydrolase 5 (EC 3.4.19.12) (Deubiquitinating enzyme 5) (Isopeptidase T) (Ubiquitin thioesterase 5) (Ubiquitin-specific-processing protease 5)
Q8VCT4	Ces1d Ces1 Ces3	0.56032,	0.15	14	Carboxylesterase 1D (Carboxylesterase 3) (EC 3.1.1.1) (EC 3.1.1.67) (Fatty acid ethyl ester synthase) (FAEE synthase) (Triacylglycerol hydrolase) (TGH)
O08808	Diaph1 Diap1	0.16378,	0.16	2	Protein diaphanous homolog 1 (Diaphanous-related formin-1) (DRF1) (p140mDIA) (mDIA1)
P63158	Hmgb1 Hmg-1 Hmg1	0.172,	0.17	7	High mobility group protein B1 (High mobility group protein 1) (HMG-1)
Q9QZQ8	H2afy	1.56796,	0.21	25	Core histone macro-H2A.1 (Histone macroH2A1) (mH2A1) (H2A.y) (H2A/y)
Q9D8N0	Eef1g	NA	0.21	10	Elongation factor 1-gamma (EF-1-gamma) (eEF-1B gamma)
Q8BGZ7	Krt75 Kb18	0.21398,	0.21	10	Keratin, type II cytoskeletal 75 (Cytokeratin-75) (CK-75) (Keratin-6 hair follicle) (mK6hf) (Keratin-75) (K75) (Type II keratin-K6hf) (Type-II keratin Kb18)
Q9JK53	Prelp	0.22277,0.25797,0.13863,	0.22	35	Prolargin (Proline-arginine-rich end leucine-rich repeat protein)
Q60847	Col12a1	0.17443,0.16592,0.37149,0.17241,0.12315,0.19782,0.13847,0.17552,0.23651,0.22186,0.21093,0.12177,0.24659,0.16081,0.17432,0.22506,0.28229,0.25254,0.18115,0.25338,0.30138,0.26662,0.27089,0.28837,0.5351,0.2608,0.26629,0.25332,0.30025,0.25974,0.25974,0.16085,0.16398,0.22075,0.22075,0.33161,0.32392,0.30514,0.30514,0.30255,0.29874,0.17458,0.31032,0.31032,0.51457,0.24731,0.31296,0.31296,0.20424,0.25371,0…	0.23	719	Collagen alpha-1(XII) chain
P05977	Myl1 Mylf	0.3491,0.27187,0.30158,0.22738,0.15619,0.14891,0.17121,	0.23	19	Myosin light chain 1/3, skeletal muscle isoform (MLC1/MLC3) (MLC1F/MLC3F) (Myosin light chain alkali 1/2) (Myosin light chain A1/A2)
Q8BFZ3	Actbl2	0.26895,	0.23	51	Beta-actin-like protein 2 (Kappa-actin)
Q9D1H9	Mfap4	0.33538,0.32771,	0.23	16	Microfibril-associated glycoprotein 4
P63268	Actg2 Acta3 Actsg	0.34895,0.39954,1.96353,0.69851,0.87472,0.63078,0.26895,0.58933,0.92462,	0.24	202	Actin, gamma-enteric smooth muscle (Alpha-actin-3) (Gamma-2-actin) (Smooth muscle gamma-actin) [Cleaved into: Actin, gamma-enteric smooth muscle, intermediate form]
Q9D1G3	Hhatl Gup1 Kiaa1173	0.26244,0.24862,	0.26	3	Protein-cysteine N-palmitoyltransferase HHAT-like protein (Glycerol uptake/transporter homolog) (Hedgehog acyltransferase-like protein)
Q62470	Itga3	0.25549,	0.26	5	Integrin alpha-3 (CD49 antigen-like family member C) (Galactoprotein B3) (GAPB3) (VLA-3 subunit alpha) (CD antigen CD49c) [Cleaved into: Integrin alpha-3 heavy chain; Integrin alpha-3 light chain]
Q62000	Ogn Og	0.26534,0.25475,0.30231,0.26568,0.22988,0.30782,0.2607,	0.27	42	Mimecan (Osteoglycin)
Q60675	Lama2	0.26889,	0.27	12	Laminin subunit alpha-2 (Laminin M chain) (Laminin-12 subunit alpha) (Laminin-2 subunit alpha) (Laminin-4 subunit alpha) (Merosin heavy chain)
O35367	Kera Ktcn	0.27796,0.23733,0.28956,0.24909,0.31299,0.40017,0.30105,0.27805,0.19487,0.34749,0.37953,0.2805,	0.28	85	Keratocan (KTN) (Keratan sulfate proteoglycan keratocan)
O70250	Pgam2	0.28047,	0.28	4	Phosphoglycerate mutase 2 (EC 5.4.2.11) (EC 5.4.2.4) (BPG-dependent PGAM 2) (Muscle-specific phosphoglycerate mutase) (Phosphoglycerate mutase isozyme M) (PGAM-M)
Q80X19	Col14a1	0.29457,0.29457,0.34039,0.37065,0.39892,0.51389,0.36014,0.29191,	0.29	107	Collagen alpha-1(XIV) chain
P51885	Lum Lcn Ldc	0.85835,0.32688,0.3249,0.27273,0.25182,0.30056,0.28086,	0.3	108	Lumican (Keratan sulfate proteoglycan lumican) (KSPG lumican)
P68033	Actc1 Actc	0.34895,0.39954,1.96353,0.69851,0.87472,0.63078,0.26895,0.58933,0.92462,0.62109,0.71554,0.71554,	0.31	232	Actin, alpha cardiac muscle 1 (Alpha-cardiac actin) [Cleaved into: Actin, alpha cardiac muscle 1, intermediate form]
P62737	Acta2 Actsa Actvs	0.34895,0.39954,1.96353,0.69851,0.87472,0.63078,0.26895,0.58933,0.92462,0.62109,0.71554,0.71554,	0.31	207	Actin, aortic smooth muscle (Alpha-actin-2) [Cleaved into: Actin, aortic smooth muscle, intermediate form]
O09061	Psmb1	0.33856,	0.34	7	Proteasome subunit beta type-1 (EC 3.4.25.1) (Macropain subunit C5) (Multicatalytic endopeptidase complex subunit C5) (Proteasome component C5) (Proteasome gamma chain)
D3Z7H8	Cilp2	0.60401,0.21475,	0.36	13	Cartilage intermediate layer protein 2 [Cleaved into: Cartilage intermediate layer protein 2 C1; Cartilage intermediate layer protein 2 C2]
Q7TQ48	Srl Sar	0.59878,0.20944,0.20944,0.33882,0.3656,0.42653,0.5762,0.49879,	0.39	39	Sarcalumenin
O09165	Casq1	0.41421,0.42338,0.54202,0.42338,0.48404,	0.42	32	Calsequestrin-1 (Calmitine) (Calsequestrin, skeletal muscle isoform)
Q61001	Lama5	0.35616,0.59458,	0.46	41	Laminin subunit alpha-5 (Laminin-10 subunit alpha) (Laminin-11 subunit alpha) (Laminin-15 subunit alpha)
O89104	Sypl2 Mg29	0.51713,0.49151,	0.5	3	Synaptophysin-like protein 2 (Mitsugumin-29) (Mg29)
Q99LX0	Park7	0.55586,	0.56	5	Protein/nucleic acid deglycase DJ-1 (EC 3.1.2.-) (EC 3.5.1.-) (EC 3.5.1.124) (Maillard deglycase) (Parkinson disease protein 7 homolog) (Parkinsonism-associated deglycase) (Protein DJ-1) (DJ-1)
Q99KJ8	Dctn2	0.58347,	0.58	8	Dynactin subunit 2 (50 kDa dynein-associated polypeptide) (Dynactin complex 50 kDa subunit) (DCTN-50) (Growth cone membrane protein 23-48K) (GMP23-48K) (p50 dynamitin)
Q9DBE0	Csad	0.58279,	0.58	2	Cysteine sulfinic acid decarboxylase (EC 4.1.1.29) (Aspartate 1-decarboxylase) (EC 4.1.1.11) (Cysteine-sulfinate decarboxylase) (Sulfinoalanine decarboxylase)
P68134	Acta1 Acta	0.34895,0.39954,1.96353,0.69851,0.87472,0.63078,0.26895,0.58933,0.92462,0.76549,0.62109,0.71554,0.71554,	0.59	234	Actin, alpha skeletal muscle (Alpha-actin-1) [Cleaved into: Actin, alpha skeletal muscle, intermediate form]
P02463	Col4a1	0.59593,0.59593,	0.6	6	Collagen alpha-1(IV) chain [Cleaved into: Arresten]
P08122	Col4a2	0.64777,	0.65	5	Collagen alpha-2(IV) chain [Cleaved into: Canstatin]
Q99MQ4	Aspn	0.66826,0.85525,0.64661,0.64661,	0.66	24	Asporin (Periodontal ligament-associated protein 1) (PLAP-1)
Q5XKE0	Mybpc2	0.667,	0.67	10	Myosin-binding protein C, fast-type (Fast MyBP-C) (C-protein, skeletal muscle fast isoform)
P23953	Ces1c Es1	0.7339,	0.73	17	Carboxylesterase 1C (EC 3.1.1.1) (Liver carboxylesterase N) (Lung surfactant convertase) (PES-N)
P14733	Lmnb1	0.76971,0.92088,0.93028,	0.92	37	Lamin-B1
Q9R0M3	Srpx	0.91785,0.91785,	0.92	11	Sushi-repeat-containing protein SRPX (DRS protein)
Q3THW5	H2afv H2av	1.43484,0.65899,	0.97	12	Histone H2A.V (H2A.F/Z)
P0C0S6	H2afz H2az	1.43484,0.65899,	0.97	12	Histone H2A.Z (H2A/z)
P84244	H3f3a H3.3a; H3f3b H3.3b	0.98917,	0.99	27	Histone H3.3
P02301	H3f3c Gm14384	0.98917,	0.99	27	Histone H3.3C (Embryonic)
Q8K1M6	Dnm1l Drp1	1.03724,	1.04	11	Dynamin-1-like protein (EC 3.6.5.5) (Dynamin family member proline-rich carboxyl-terminal domain less) (Dymple) (Dynamin-related protein 1)
A2AMT1	Bfsp1	1.09273,	1.09	7	Filensin (Beaded filament structural protein 1) (Lens fiber cell beaded-filament structural protein CP 95) (CP95)
Q91ZA3	Pcca	1.10896,	1.11	4	Propionyl-CoA carboxylase alpha chain, mitochondrial (PCCase subunit alpha) (EC 6.4.1.3) (Propanoyl-CoA:carbon dioxide ligase subunit alpha)
P62855	Rps26	1.25157,1.15106,	1.2	7	40S ribosomal protein S26
Q91VR5	Ddx1	1.25794,	1.26	5	ATP-dependent RNA helicase DDX1 (EC 3.6.4.13) (DEAD box protein 1)
P23927	Cryab Crya2	2.73356,1.16076,1.28794,1.34986,1.35296,0.92738,2.00013,	1.35	200	Alpha-crystallin B chain (Alpha(B)-crystallin) (P23)
O35638	Stag2 Sa2 Sap2	1.37321,	1.37	1	Cohesin subunit SA-2 (SCC3 homolog 2) (Stromal antigen 2)
Q61554	Fbn1 Fbn-1	1.39373,1.41141,1.41141,1.67637,1.1274,2.26365,1.43955,1.56999,1.35013,	1.41	88	Fibrillin-1 [Cleaved into: Asprosin]
P62696	Crybb2	1.71521,1.42217,1.48161,2.30395,1.3444,1.58817,	1.53	125	Beta-crystallin B2 (Beta-B2 crystallin) (Beta-crystallin Bp)
P04344	Crygb	0.852,2.40544,1.53851,1.59184,1.71471,1.65846,1.41874,	1.59	74	Gamma-crystallin B (Gamma-B-crystallin) (Gamma-crystallin 3)
Q64523	Hist2h2ac Hist2h2ab	1.43484,1.84875,	1.63	58	Histone H2A type 2-C (H2a-613B)
Q6GSS7	Hist2h2aa1; Hist2h2aa2	1.43484,1.84875,	1.63	58	Histone H2A type 2-A (H2a-614) (H2a-615) (Histone H2A.2)
Q8CGP6	Hist1h2ah	1.43484,1.84875,	1.63	56	Histone H2A type 1-H
Q8R1M2	H2afj	1.43484,1.84875,	1.63	56	Histone H2A.J (H2a/j)
Q8CGP7	Hist1h2ak	1.43484,1.84875,	1.63	56	Histone H2A type 1-K
Q8CGP5	Hist1h2af	1.43484,1.84875,	1.63	56	Histone H2A type 1-F
Q8BFU2	Hist3h2a	1.43484,1.84875,	1.63	56	Histone H2A type 3
C0HKE1	Hist1h2ab	1.43484,1.84875,	1.63	56	Histone H2A type 1-B
C0HKE2	Hist1h2ac	1.43484,1.84875,	1.63	56	Histone H2A type 1-C
C0HKE3	Hist1h2ad	1.43484,1.84875,	1.63	56	Histone H2A type 1-D
C0HKE4	Hist1h2ae	1.43484,1.84875,	1.63	56	Histone H2A type 1-E
C0HKE5	Hist1h2ag	1.43484,1.84875,	1.63	56	Histone H2A type 1-G
C0HKE6	Hist1h2ai	1.43484,1.84875,	1.63	56	Histone H2A type 1-I
C0HKE7	Hist1h2an	1.43484,1.84875,	1.63	56	Histone H2A type 1-N
C0HKE8	Hist1h2ao	1.43484,1.84875,	1.63	56	Histone H2A type 1-O
C0HKE9	Hist1h2ap	1.43484,1.84875,	1.63	56	Histone H2A type 1-P
Q64522	Hist2h2ab	1.43484,1.56796,3.86783,1.84875,	1.7	71	Histone H2A type 2-B (H2a-613A)
P27661	H2afx H2a.x H2ax Hist5-2ax	1.43484,1.56796,3.86783,1.84875,	1.7	71	Histone H2AX (H2a/x) (Histone H2A.X)
Q61597	Crygc Gammab-cry	0.852,2.40544,1.53851,1.59184,1.71471,2.76747,2.86132,	1.71	50	Gamma-crystallin C (Gamma-C-crystallin)
Q91VC3	Eif4a3 Ddx48	1.80708,	1.81	9	Eukaryotic initiation factor 4A-III (eIF-4A-III) (eIF4A-III) (EC 3.6.4.13) (ATP-dependent RNA helicase DDX48) (ATP-dependent RNA helicase eIF4A-3) (DEAD box protein 48) (Eukaryotic translation initiation factor 4A isoform 3) [Cleaved into: Eukaryotic initiation factor 4A-III, N-terminally processed]
P62806	Hist1h4a; Hist1h4b H4-53; Hist1h4c H4-12; Hist1h4d; Hist1h4f; Hist1h4h; Hist1h4i; Hist1h4j; Hist1h4k; Hist1h4m; Hist2h4a Hist2h4; Hist4h4	1.95471,2.15027,1.69158,2.80671,1.15781,1.6593,	1.82	65	Histone H4
P15864	Hist1h1c H1f2	1.95104,2.16206,1.9,1.04838,	1.93	12	Histone H1.2 (H1 VAR.1) (H1c)
P43277	Hist1h1d H1f3	1.95104,2.16206,1.9,1.04838,	1.93	12	Histone H1.3 (H1 VAR.4) (H1d)
P51180	Mip Palm	0.98382,4.21234,	2.04	3	Lens fiber major intrinsic protein (Aquaporin-0) (MIP26) (MP26)
P46425	Gstp2 Gstpia	2.0629,	2.06	12	Glutathione S-transferase P 2 (Gst P2) (EC 2.5.1.18) (GST YF-YF) (GST class-pi) (GST-piA)
Q9D2U9	Hist3h2ba	2.11294,	2.11	43	Histone H2B type 3-A
Q64524	Hist2h2be	2.11294,	2.11	43	Histone H2B type 2-E (H2b 613)
P24622	Cryaa Crya1	2.36624,1.92797,1.87636,4.46141,	2.14	83	Alpha-crystallin A chain
P10854	Hist1h2bm	2.15736,2.15736,2.19384,2.11294,	2.16	52	Histone H2B type 1-M (H2B 291B)
Q64525	Hist2h2bb	2.15736,2.15736,2.19384,2.11294,	2.16	52	Histone H2B type 2-B (H2b 616)
Q64478	Hist1h2bh	2.15736,2.15736,2.19384,2.11294,	2.16	52	Histone H2B type 1-H (h2B-221)
Q6ZWY9	Hist1h2bc; Hist1h2be; Hist1h2bg	2.15736,2.15736,2.19384,2.11294,	2.16	52	Histone H2B type 1-C/E/G
Q64475	Hist1h2bb	2.15736,2.15736,2.19384,2.11294,	2.16	52	Histone H2B type 1-B (h2B-143)
Q8CGP1	Hist1h2bk	2.15736,2.15736,2.19384,2.11294,	2.16	52	Histone H2B type 1-K
P10853	Hist1h2bf H2b-f; Hist1h2bj H2b-j; Hist1h2bl H2b-l; Hist1h2bn H2b-n	2.15736,2.15736,2.19384,2.11294,	2.16	52	Histone H2B type 1-F/J/L (H2B 291A)
Q8CGP2	Hist1h2bp	2.15736,2.15736,2.19384,2.11294,	2.16	52	Histone H2B type 1-P
Q3UVK0	Ermp1 D19Wsu12e Fxna Kiaa1815	2.17682,	2.18	2	Endoplasmic reticulum metallopeptidase 1 (EC 3.4.-.-) (Felix-ina)
Q9ES97	Rtn3	2.21287,	2.21	4	Reticulon-3
P04342	Crygd	2.14878,1.98801,1.998,2.41909,5.7506,7.50801,	2.28	118	Gamma-crystallin D (Gamma-D-crystallin) (Gamma-crystallin 1)
Q03740	Cryge	6.61153,1.98801,1.998,2.41909,7.50801,	2.42	176	Gamma-crystallin E (Gamma-E-crystallin)
Q9CXV3	Crygf	6.61153,1.98801,1.998,2.41909,7.50801,	2.42	176	Gamma-crystallin F (Gamma-F-crystallin)
Q9JJV1	Cryba2	2.71743,2.71743,	2.72	127	Beta-crystallin A2 (Beta-A2 crystallin)
Q04857	Col6a1	2.72865,5.19167,2.95088,5.13418,2.10495,4.64812,2.88068,2.88068,2.89616,3.01702,3.35883,2.33642,3.98396,1.69839,2.09058,2.81449,1.85122,2.29025,2.66131,2.41114,3.11033,	2.92	347	Collagen alpha-1(VI) chain
O35486	Crygs	4.97147,2.56588,2.98294,	2.98	44	Gamma-crystallin S (Beta-crystallin S) (Gamma-S-crystallin)
Q02788	Col6a2	2.73186,5.52553,3.94005,1.61534,2.69872,3.061,3.061,2.35974,4.32699,2.00152,	3.47	246	Collagen alpha-2(VI) chain
P68433	Hist1h3a H3a; Hist1h3g H3.1-221 H3g; Hist1h3h H3.1-291 H3h; Hist1h3i H3.1-I H3i	5.13543,4.90153,	5.02	14	Histone H3.1
Q99P91	Gpnmb Dchil Hgfin Nmb	5.27795,	5.28	14	Transmembrane glycoprotein NMB (DC-HIL) (Dendritic cell-associated transmembrane protein) (Osteoactivin)
P63087	Ppp1cc	5.21,5.65723,	5.43	14	Serine/threonine-protein phosphatase PP1-gamma catalytic subunit (PP-1G) (EC 3.1.3.16) (Protein phosphatase 1C catalytic subunit)
P62137	Ppp1ca Ppp1a	5.21,5.65723,	5.43	12	Serine/threonine-protein phosphatase PP1-alpha catalytic subunit (PP-1A) (EC 3.1.3.16)
P11087	Col1a1 Cola1	4.51132,4.49406,6.31817,5.8197,4.67269,4.52787,7.0354,	5.55	104	Collagen alpha-1(I) chain (Alpha-1 type I collagen)
Q9JJV0	Cryba4	3.2855,4.11985,5.79695,	6.11	101	Beta-crystallin A4 (Beta-A4 crystallin)
P84228	Hist1h3b H3-53 H3.2 H3b; Hist1h3c H3-143; Hist1h3d H3-B; Hist1h3e H3-F; Hist1h3f H3.2-221 H3f; Hist2h3b H3.2-616; Hist2h3c1 H3.2-615 Hist2h3ca1; Hist2h3c2 H3.2-614 Hist2h3ca2	6.11136,6.48965,3.60338,	6.11	33	Histone H3.2
Q9D0M3	Cyc1	6.53647,	6.54	10	Cytochrome c1, heme protein, mitochondrial (Complex III subunit 4) (Complex III subunit IV) (Cytochrome b-c1 complex subunit 4) (Ubiquinol-cytochrome-c reductase complex cytochrome c1 subunit) (Cytochrome c-1)
P97350	Pkp1	7.064,	7.06	15	Plakophilin-1
Q9Z2U0	Psma7	7.45029,	7.45	3	Proteasome subunit alpha type-7 (EC 3.4.25.1) (Proteasome subunit RC6-1)
Q9CWH6	Psma8 Psma7l	7.45029,	7.45	2	Proteasome subunit alpha-type 7-like (EC 3.4.25.1)
Q01149	Col1a2 Cola2	11.54709,11.54709,7.37417,8.13009,7.59029,6.61889,	7.86	80	Collagen alpha-2(I) chain (Alpha-2 type I collagen)
Q9WVJ5	Crybb1	4.82618,	7.98	112	Beta-crystallin B1 (Beta-B1 crystallin) [Cleaved into: Beta-crystallin B1B]
Q9JJU9	Crybb3	6.57346,	10.05	50	Beta-crystallin B3 (Beta-B3 crystallin) [Cleaved into: Beta-crystallin B3, N-terminally processed]
P62918	Rpl8	NA	13.25	10	60S ribosomal protein L8
Q8CCK0	H2afy2 H2afy3	NA	16.4	9	Core histone macro-H2A.2 (Histone macroH2A2) (mH2A2)
Q8R1F1	Fam129b	92.03676,	20	7	Niban-like protein 1 (Protein FAM129B)
Q63870	Col7a1		14N only	20	Collagen alpha-1(VII) chain (Long-chain collagen) (LC collagen)
Q61555	Fbn2 Fbn-2		14N only	17	Fibrillin-2 [Cleaved into: Fibrillin-2 C-terminal peptide]
Q9WVH9	Fbln5 Dance		14N only	27	Fibulin-5 (FIBL-5) (Developmental arteries and neural crest EGF-like protein) (Dance)
P02469	Lamb1 Lamb-1 Lamb1-1		14N only	14	Laminin subunit beta-1 (Laminin B1 chain) (Laminin-1 subunit beta) (Laminin-10 subunit beta) (Laminin-12 subunit beta) (Laminin-2 subunit beta) (Laminin-6 subunit beta) (Laminin-8 subunit beta)
P04345	Cryga		14N only	29	Gamma-crystallin A (Gamma-A-crystallin) (Gamma-crystallin 4)
P04104	Krt1 Krt2-1		14N only	11	Keratin, type II cytoskeletal 1 (67 kDa cytokeratin) (Cytokeratin-1) (CK-1) (Keratin-1) (K1) (Type-II keratin Kb1)
Q61292	Lamb2 Lams		14N only	14	Laminin subunit beta-2 (Laminin-11 subunit beta) (Laminin-14 subunit beta) (Laminin-15 subunit beta) (Laminin-3 subunit beta) (Laminin-4 subunit beta) (Laminin-7 subunit beta) (Laminin-9 subunit beta) (S-laminin subunit beta) (S-LAM beta)
Q8VHL5	Crygn		14N only	7	Gamma-crystallin N (Gamma-N-crystallin)
P02535	Krt10 Krt1-10		14N only	9	Keratin, type I cytoskeletal 10 (56 kDa cytokeratin) (Cytokeratin-10) (CK-10) (Keratin, type I cytoskeletal 59 kDa) (Keratin-10) (K10)
Q9EP64	Tnmd Chm1l		14N only	9	Tenomodulin (TeM) (mTeM) (Chondromodulin-1-like protein) (ChM1L) (mChM1L) (Chondromodulin-I-like protein) (Myodulin) (Tendin)
Q6NVD9	Bfsp2		14N only	6	Phakinin (49 kDa cytoskeletal protein) (Beaded filament structural protein 2) (Lens fiber cell beaded filament protein CP 49) (CP49)
Q6NXH9	Krt73 Kb36		14N only	7	Keratin, type II cytoskeletal 73 (Cytokeratin-73) (CK-73) (Keratin-73) (K73) (Type II inner root sheath-specific keratin-K6irs3) (Type-II keratin Kb36)
Q9QZR9	Col4a4		14N only	3	Collagen alpha-4(IV) chain
Q3U962	Col5a2		14N only	2	Collagen alpha-2(V) chain
Q9QZZ6	Dpt		14N only	2	Dermatopontin (Early quiescence protein 1) (EQ-1) (Tyrosine-rich acidic matrix protein) (TRAMP)
P11276	Fn1		14N only	35	Fibronectin (FN) [Cleaved into: Anastellin]
P48678	Lmna Lmn1		14N only	26	Prelamin-A/C [Cleaved into: Lamin-A/C]
Q99JY9	Actr3 Arp3		14N only	18	Actin-related protein 3 (Actin-like protein 3)
P07310	Ckm Ckmm		14N only	25	Creatine kinase M-type (EC 2.7.3.2) (Creatine kinase M chain) (Creatine phosphokinase M-type) (CPK-M) (M-CK)
Q80W21	Gstm7		14N only	7	Glutathione S-transferase Mu 7 (EC 2.5.1.18) (GST class-mu 7) (GSTM-7)
Q641P0	Actr3b		14N only	6	Actin-related protein 3B (ARP3-beta) (Actin-like protein 3B)
Q9DCV7	Krt7 Krt2-7		14N only	4	Keratin, type II cytoskeletal 7 (Cytokeratin-7) (CK-7) (Keratin-7) (K7) (Type-II keratin Kb7)
O89023	Tpp1 Cln2		14N only	5	Tripeptidyl-peptidase 1 (TPP-1) (EC 3.4.14.9) (Lysosomal pepstatin-insensitive protease) (LPIC) (Tripeptidyl aminopeptidase) (Tripeptidyl-peptidase I) (TPP-I)
P21619	Lmnb2		14N only	4	Lamin-B2
O35083	Agpat1		14N only	6	1-acyl-sn-glycerol-3-phosphate acyltransferase alpha (EC 2.3.1.51) (1-acylglycerol-3-phosphate O-acyltransferase 1) (1-AGP acyltransferase 1) (1-AGPAT 1) (Lysophosphatidic acid acyltransferase alpha) (LPAAT-alpha)
Q6IFX2	Krt42 Ka22		14N only	6	Keratin, type I cytoskeletal 42 (Cytokeratin-42) (CK-42) (Keratin-17n) (Keratin-42) (K42) (Type I keratin Ka22)
A6H584	Col6a5 Col29a1 Gm7455		14N only	5	Collagen alpha-5(VI) chain (Collagen alpha-1(XXIX) chain)
Q05816	Fabp5 Fabpe Klbp Mal1		14N only	13	Fatty acid-binding protein 5 (Epidermal-type fatty acid-binding protein) (E-FABP) (Fatty acid-binding protein, epidermal) (Keratinocyte lipid-binding protein) (Psoriasis-associated fatty acid-binding protein homolog) (PA-FABP)
Q9QZS0	Col4a3		14N only	6	Collagen alpha-3(IV) chain [Cleaved into: Tumstatin]
P00405	Mtco2 COII COX2 mt-Co2		14N only	3	Cytochrome c oxidase subunit 2 (Cytochrome c oxidase polypeptide II)
Q9CZU6	Cs		14N only	3	Citrate synthase, mitochondrial (EC 2.3.3.1) (Citrate (Si)-synthase)
P29387	Gnb4		14N only	2	Guanine nucleotide-binding protein subunit beta-4 (Transducin beta chain 4)
Q9QXX4	Slc25a13 Aralar2		14N only	2	Calcium-binding mitochondrial carrier protein Aralar2 (Citrin) (Mitochondrial aspartate glutamate carrier 2) (Solute carrier family 25 member 13)
Q9D1U0	Grifin		14N only	1	Grifin (Galectin-related inter-fiber protein)
Q9R0H5	Krt71 K6irs1 Kb34 Krt2-6g Krt6g		14N only	5	Keratin, type II cytoskeletal 71 (Cytokeratin-6G) (CK-6G) (Cytokeratin-71) (CK-71) (Keratin-6G) (K6G) (Keratin-71) (K71) (Type II inner root sheath-specific keratin-K6irs1) (mK6irs) (mK6irs1/Krt2-6g) (Type-II keratin Kb34)
Q6IFZ6	Krt77 Krt1b		14N only	5	Keratin, type II cytoskeletal 1b (Cytokeratin-1B) (CK-1B) (Embryonic type II keratin-1) (Keratin-77) (K77) (Type-II keratin Kb39)
P03995	Gfap		14N only	2	Glial fibrillary acidic protein (GFAP)
Q9Z2T6	Krt85 Krt2-18 Krthb5		14N only	2	Keratin, type II cuticular Hb5 (Keratin-85) (K85) (Type II hair keratin Hb5) (Type-II keratin Kb25)
P43274	Hist1h1e H1f4		14N only	2	Histone H1.4 (H1 VAR.2) (H1e)
P43275	Hist1h1a H1a H1f1		14N only	2	Histone H1.1 (H1 VAR.3) (Histone H1a) (H1a)
P70696	Hist1h2ba Th2b		14N only	1	Histone H2B type 1-A (Histone H2B, testis) (Testis-specific histone H2B)
Q8C6K9	Col6a6		14N only	2	Collagen alpha-6(VI) chain
Q8BJM7	Tyw1 Rsafd1		14N only	1	S-adenosyl-L-methionine-dependent tRNA 4-demethylwyosine synthase (EC 4.1.3.44) (Radical S-adenosyl methionine and flavodoxin domain-containing protein 1) (tRNA wybutosine-synthesizing protein 1 homolog) (tRNA-yW-synthesizing protein)
Q9WV52	Plek2		14N only	1	Pleckstrin-2
O88207	Col5a1		14N only	4	Collagen alpha-1(V) chain
Q99MY8	Ash1l		14N only	1	Histone-lysine N-methyltransferase ASH1L (EC 2.1.1.43) (ASH1-like protein) (Absent small and homeotic disks protein 1 homolog)
Q8CC27	Cacnb2 Cacnlb2		14N only	1	Voltage-dependent L-type calcium channel subunit beta-2 (CAB2) (Calcium channel voltage-dependent subunit beta 2)
P27573	Mpz P0		14N only	1	Myelin protein P0 (Myelin peripheral protein) (MPP) (Myelin protein zero)
P98156	Vldlr		14N only	1	Very low-density lipoprotein receptor (VLDL receptor) (VLDL-R)
P47739	Aldh3a1 Ahd-4 Ahd4 Aldh3 Aldh4		15N only	101	Aldehyde dehydrogenase, dimeric NADP-preferring (EC 1.2.1.5) (Aldehyde dehydrogenase 4) (Aldehyde dehydrogenase family 3 member A1) (Dioxin-inducible aldehyde dehydrogenase 3)
Q9WUB3	Pygm		15N only	46	Glycogen phosphorylase, muscle form (EC 2.4.1.1) (Myophosphorylase)
Q76MZ3	Ppp2r1a		15N only	32	Serine/threonine-protein phosphatase 2A 65 kDa regulatory subunit A alpha isoform (PP2A subunit A isoform PR65-alpha) (PP2A subunit A isoform R1-alpha)
P97449	Anpep Lap-1 Lap1		15N only	38	Aminopeptidase N (AP-N) (mAPN) (EC 3.4.11.2) (Alanyl aminopeptidase) (Aminopeptidase M) (AP-M) (Membrane protein p161) (Microsomal aminopeptidase) (CD antigen CD13)
Q6URW6	Myh14		15N only	30	Myosin-14 (Myosin heavy chain 14) (Myosin heavy chain, non-muscle IIc) (Non-muscle myosin heavy chain IIc) (NMHC II-C)
P47857	Pfkm Pfk-m Pfka		15N only	27	ATP-dependent 6-phosphofructokinase, muscle type (ATP-PFK) (PFK-M) (EC 2.7.1.11) (6-phosphofructokinase type A) (Phosphofructo-1-kinase isozyme A) (PFK-A) (Phosphohexokinase)
Q61414	Krt15 Krt1-15		15N only	45	Keratin, type I cytoskeletal 15 (Cytokeratin-15) (CK-15) (Keratin-15) (K15)
Q9D952	Evpl		15N only	22	Envoplakin (210 kDa cornified envelope precursor protein) (p210)
P47738	Aldh2 Ahd-1 Ahd1		15N only	32	Aldehyde dehydrogenase, mitochondrial (EC 1.2.1.3) (AHD-M1) (ALDH class 2) (ALDH-E2) (ALDHI)
P09103	P4hb Pdia1		15N only	38	Protein disulfide-isomerase (PDI) (EC 5.3.4.1) (Cellular thyroid hormone-binding protein) (Endoplasmic reticulum resident protein 59) (ER protein 59) (ERp59) (Prolyl 4-hydroxylase subunit beta) (p55)
Q3UW53	Fam129a Niban		15N only	29	Protein Niban (Protein FAM129A)
Q8VHX6	Flnc Abpl Fln2		15N only	28	Filamin-C (FLN-C) (ABP-280-like protein) (ABP-L) (Actin-binding-like protein) (Filamin-2) (Gamma-filamin)
Q80X90	Flnb		15N only	25	Filamin-B (FLN-B) (ABP-280-like protein) (Actin-binding-like protein) (Beta-filamin)
Q8CI94	Pygb		15N only	24	Glycogen phosphorylase, brain form (EC 2.4.1.1)
P20612	Gnat1 Gnat-1		15N only	33	Guanine nucleotide-binding protein G(t) subunit alpha-1 (Transducin alpha-1 chain)
Q8CIE6	Copa		15N only	21	Coatomer subunit alpha (Alpha-coat protein) (Alpha-COP) [Cleaved into: Xenin (Xenopsin-related peptide); Proxenin]
Q91ZX7	Lrp1 A2mr		15N only	17	Prolow-density lipoprotein receptor-related protein 1 (LRP-1) (Alpha-2-macroglobulin receptor) (A2MR) (CD antigen CD91) [Cleaved into: Low-density lipoprotein receptor-related protein 1 85 kDa subunit (LRP-85); Low-density lipoprotein receptor-related protein 1 515 kDa subunit (LRP-515); Low-density lipoprotein receptor-related protein 1 intracellular domain (LRPICD)]
Q64437	Adh7 Adh-3 Adh3		15N only	30	Alcohol dehydrogenase class 4 mu/sigma chain (EC 1.1.1.1) (ADH-C2) (Alcohol dehydrogenase 7) (Alcohol dehydrogenase class IV mu/sigma chain) (Gastric alcohol dehydrogenase) (Retinol dehydrogenase)
Q8R1Q3	Angptl7		15N only	29	Angiopoietin-related protein 7 (Angiopoietin-like protein 7)
O88342	Wdr1		15N only	28	WD repeat-containing protein 1 (Actin-interacting protein 1) (AIP1)
P31001	Des		15N only	20	Desmin
P26041	Msn		15N only	30	Moesin (Membrane-organizing extension spike protein)
Q9JIF7	Copb1 Copb		15N only	21	Coatomer subunit beta (Beta-coat protein) (Beta-COP)
P62814	Atp6v1b2 Atp6b2 Vat2		15N only	27	V-type proton ATPase subunit B, brain isoform (V-ATPase subunit B 2) (Endomembrane proton pump 58 kDa subunit) (Vacuolar proton pump subunit B 2)
O70133	Dhx9 Ddx9		15N only	19	ATP-dependent RNA helicase A (EC 3.6.4.13) (DEAH box protein 9) (mHEL-5) (Nuclear DNA helicase II) (NDH II) (RNA helicase A) (RHA)
Q91V92	Acly		15N only	14	ATP-citrate synthase (EC 2.3.3.8) (ATP-citrate (pro-S-)-lyase) (Citrate cleavage enzyme)
Q9R269	Ppl		15N only	19	Periplakin
P40124	Cap1 Cap		15N only	21	Adenylyl cyclase-associated protein 1 (CAP 1)
P62141	Ppp1cb		15N only	17	Serine/threonine-protein phosphatase PP1-beta catalytic subunit (PP-1B) (EC 3.1.3.16) (EC 3.1.3.53)
Q9Z275	Rlbp1 Cralbp		15N only	30	Retinaldehyde-binding protein 1 (Cellular retinaldehyde-binding protein)
P61979	Hnrnpk Hnrpk		15N only	24	Heterogeneous nuclear ribonucleoprotein K (hnRNP K)
P29758	Oat		15N only	14	Ornithine aminotransferase, mitochondrial (EC 2.6.1.13) (Ornithine--oxo-acid aminotransferase)
P35564	Canx		15N only	27	Calnexin
Q62234	Myom1		15N only	18	Myomesin-1 (Myomesin family member 1) (Skelemin)
Q9EQH3	Vps35 Mem3		15N only	19	Vacuolar protein sorting-associated protein 35 (Maternal-embryonic 3) (Vesicle protein sorting 35)
Q91YQ5	Rpn1		15N only	15	Dolichyl-diphosphooligosaccharide--protein glycosyltransferase subunit 1 (Dolichyl-diphosphooligosaccharide--protein glycosyltransferase 67 kDa subunit) (Ribophorin I) (RPN-I) (Ribophorin-1)
Q9QZE5	Copg1 Copg		15N only	21	Coatomer subunit gamma-1 (Gamma-1-coat protein) (Gamma-1-COP)
Q61781	Krt14 Krt1-14		15N only	22	Keratin, type I cytoskeletal 14 (Cytokeratin-14) (CK-14) (Keratin-14) (K14)
O35350	Capn1 Canp1 Capa1		15N only	22	Calpain-1 catalytic subunit (EC 3.4.22.52) (Calcium-activated neutral proteinase 1) (CANP 1) (Calpain mu-type) (Calpain-1 large subunit) (Micromolar-calpain) (muCANP)
P19001	Krt19 Krt1-19		15N only	16	Keratin, type I cytoskeletal 19 (Cytokeratin-19) (CK-19) (Keratin-19) (K19)
P80313	Cct7 Ccth		15N only	18	T-complex protein 1 subunit eta (TCP-1-eta) (CCT-eta)
P11983	Tcp1 Cct1 Ccta		15N only	17	T-complex protein 1 subunit alpha (TCP-1-alpha) (CCT-alpha) (Tailless complex polypeptide 1A) (TCP-1-A) (Tailless complex polypeptide 1B) (TCP-1-B)
Q9WUA3	Pfkp Pfkc		15N only	17	ATP-dependent 6-phosphofructokinase, platelet type (ATP-PFK) (PFK-P) (EC 2.7.1.11) (6-phosphofructokinase type C) (Phosphofructo-1-kinase isozyme C) (PFK-C) (Phosphohexokinase)
O35737	Hnrnph1 Hnrph Hnrph1		15N only	16	Heterogeneous nuclear ribonucleoprotein H (hnRNP H) [Cleaved into: Heterogeneous nuclear ribonucleoprotein H, N-terminally processed]
Q99JY0	Hadhb		15N only	14	Trifunctional enzyme subunit beta, mitochondrial (TP-beta) [Includes: 3-ketoacyl-CoA thiolase (EC 2.3.1.16) (Acetyl-CoA acyltransferase) (Beta-ketothiolase)]
P39053	Dnm1 Dnm Kiaa4093		15N only	18	Dynamin-1 (EC 3.6.5.5)
Q91X72	Hpx Hpxn		15N only	25	Hemopexin
P29699	Ahsg Fetua		15N only	16	Alpha-2-HS-glycoprotein (Countertrypin) (Fetuin-A)
Q99P72	Rtn4 Kiaa0886 Nogo		15N only	29	Reticulon-4 (Neurite outgrowth inhibitor) (Nogo protein)
P70124	Serpinb5 Pi5 Spi5 Spi7		15N only	18	Serpin B5 (Maspin) (Peptidase inhibitor 5) (PI-5)
Q8BHB9	Clic6		15N only	12	Chloride intracellular channel protein 6
P16460	Ass1 Ass		15N only	11	Argininosuccinate synthase (EC 6.3.4.5) (Citrulline--aspartate ligase)
P12382	Pfkl Pfk-l Pfkb		15N only	17	ATP-dependent 6-phosphofructokinase, liver type (ATP-PFK) (PFK-L) (EC 2.7.1.11) (6-phosphofructokinase type B) (Phosphofructo-1-kinase isozyme B) (PFK-B) (Phosphohexokinase)
P80318	Cct3 Cctg		15N only	11	T-complex protein 1 subunit gamma (TCP-1-gamma) (CCT-gamma) (Matricin) (mTRiC-P5)
Q9R0P3	Esd Es10 Sid478		15N only	14	S-formylglutathione hydrolase (FGH) (EC 3.1.2.12) (Esterase 10) (Esterase D) (Sid 478)
Q11011	Npepps Psa		15N only	11	Puromycin-sensitive aminopeptidase (PSA) (EC 3.4.11.14) (Cytosol alanyl aminopeptidase) (AAP-S)
Q9Z1N5	Ddx39b Bat1 Bat1a Uap56		15N only	11	Spliceosome RNA helicase Ddx39b (EC 3.6.4.13) (56 kDa U2AF65-associated protein) (DEAD box protein UAP56) (HLA-B-associated transcript 1 protein)
Q8QZT1	Acat1		15N only	14	Acetyl-CoA acetyltransferase, mitochondrial (EC 2.3.1.9) (Acetoacetyl-CoA thiolase)
O09131	Gsto1 Gstx Gtsttl		15N only	20	Glutathione S-transferase omega-1 (GSTO-1) (EC 2.5.1.18) (Glutathione S-transferase omega 1-1) (GSTO 1-1) (Glutathione-dependent dehydroascorbate reductase) (EC 1.8.5.1) (Monomethylarsonic acid reductase) (MMA(V) reductase) (EC 1.20.4.2) (S-(Phenacyl)glutathione reductase) (SPG-R) (p28)
P10605	Ctsb		15N only	15	Cathepsin B (EC 3.4.22.1) (Cathepsin B1) [Cleaved into: Cathepsin B light chain; Cathepsin B heavy chain]
Q9DCN2	Cyb5r3 Dia1		15N only	13	NADH-cytochrome b5 reductase 3 (B5R) (Cytochrome b5 reductase) (EC 1.6.2.2) (Diaphorase-1) [Cleaved into: NADH-cytochrome b5 reductase 3 membrane-bound form; NADH-cytochrome b5 reductase 3 soluble form]
Q8BG05	Hnrnpa3 Hnrpa3		15N only	13	Heterogeneous nuclear ribonucleoprotein A3 (hnRNP A3)
Q8R081	Hnrnpl Hnrpl		15N only	17	Heterogeneous nuclear ribonucleoprotein L (hnRNP L)
Q9DBG6	Rpn2		15N only	9	Dolichyl-diphosphooligosaccharide--protein glycosyltransferase subunit 2 (Dolichyl-diphosphooligosaccharide--protein glycosyltransferase 63 kDa subunit) (Ribophorin II) (RPN-II) (Ribophorin-2)
Q62167	Ddx3x D1Pas1-rs2 Ddx3 Dead3 Erh		15N only	14	ATP-dependent RNA helicase DDX3X (EC 3.6.4.13) (D1Pas1-related sequence 2) (DEAD box RNA helicase DEAD3) (mDEAD3) (DEAD box protein 3, X-chromosomal) (Embryonic RNA helicase)
Q8CAQ8	Immt Mic60		15N only	15	MICOS complex subunit Mic60 (Mitochondrial inner membrane protein) (Mitofilin)
Q61147	Cp		15N only	14	Ceruloplasmin (EC 1.16.3.1) (Ferroxidase)
O54724	Cavin1 Ptrf		15N only	15	Caveolae-associated protein 1 (Cav-p60) (Cavin-1) (Polymerase I and transcript release factor)
Q9JKR6	Hyou1 Grp170		15N only	16	Hypoxia up-regulated protein 1 (GRP-170) (140 kDa Ca(2+)-binding protein) (CBP-140)
Q8BH64	Ehd2		15N only	14	EH domain-containing protein 2
P55292	Dsc2 Dsc3		15N only	11	Desmocollin-2 (Epithelial type 2 desmocollin)
O35640	Anxa8 Anx8		15N only	14	Annexin A8 (Annexin VIII) (Annexin-8)
Q8BPB5	Efemp1 Fbln3		15N only	13	EGF-containing fibulin-like extracellular matrix protein 1 (Fibulin-3) (FIBL-3)
P97351	Rps3a Rps3a1		15N only	10	40S ribosomal protein S3a (Protein TU-11)
Q922R8	Pdia6 Txndc7		15N only	12	Protein disulfide-isomerase A6 (EC 5.3.4.1) (Thioredoxin domain-containing protein 7)
Q99KC8	Vwa5a Loh11cr2a		15N only	12	von Willebrand factor A domain-containing protein 5A (Loss of heterozygosity 11 chromosomal region 2 gene A protein homolog)
Q9R0P5	Dstn Dsn Sid23		15N only	12	Destrin (Actin-depolymerizing factor) (ADF) (Sid 23)
P06801	Me1 Mod-1 Mod1		15N only	15	NADP-dependent malic enzyme (NADP-ME) (EC 1.1.1.40) (Malic enzyme 1)
Q9WVK4	Ehd1 Past1		15N only	10	EH domain-containing protein 1 (PAST homolog 1) (mPAST1)
Q9ERK4	Cse1l Xpo2		15N only	12	Exportin-2 (Exp2) (Chromosome segregation 1-like protein) (Importin-alpha re-exporter)
Q61753	Phgdh		15N only	11	D-3-phosphoglycerate dehydrogenase (3-PGDH) (EC 1.1.1.95) (A10)
P47754	Capza2 Cappa2		15N only	14	F-actin-capping protein subunit alpha-2 (CapZ alpha-2)
P46460	Nsf Skd2		15N only	9	Vesicle-fusing ATPase (EC 3.6.4.6) (N-ethylmaleimide-sensitive fusion protein) (NEM-sensitive fusion protein) (Suppressor of K(+) transport growth defect 2) (Protein SKD2) (Vesicular-fusion protein NSF)
P70333	Hnrnph2 Hnrph2		15N only	14	Heterogeneous nuclear ribonucleoprotein H2 (hnRNP H2) (Heterogeneous nuclear ribonucleoprotein H') (hnRNP H') [Cleaved into: Heterogeneous nuclear ribonucleoprotein H2, N-terminally processed]
P15499	Prph2 Rds		15N only	11	Peripherin-2 (Retinal degeneration slow protein)
O08528	Hk2		15N only	8	Hexokinase-2 (EC 2.7.1.1) (Hexokinase type II) (HK II)
Q91WC3	Acsl6 Facl6		15N only	11	Long-chain-fatty-acid--CoA ligase 6 (EC 6.2.1.3) (Long-chain acyl-CoA synthetase 6) (LACS 6)
P18242	Ctsd		15N only	15	Cathepsin D (EC 3.4.23.5)
Q8K310	Matr3		15N only	15	Matrin-3
Q8BHN3	Ganab G2an Kiaa0088		15N only	9	Neutral alpha-glucosidase AB (EC 3.2.1.84) (Alpha-glucosidase 2) (Glucosidase II subunit alpha)
Q99PV0	Prpf8 Prp8		15N only	13	Pre-mRNA-processing-splicing factor 8 (Splicing factor Prp8)
Q7TMK9	Syncrip Hnrpq Nsap1 Nsap1l		15N only	10	Heterogeneous nuclear ribonucleoprotein Q (hnRNP Q) (Glycine- and tyrosine-rich RNA-binding protein) (GRY-RBP) (NS1-associated protein 1) (Synaptotagmin-binding, cytoplasmic RNA-interacting protein) (pp68)
Q9EQP2	Ehd4 Past2		15N only	10	EH domain-containing protein 4 (PAST homolog 2) (mPAST2)
Q6P5E4	Uggt1 Gt Ugcgl1 Uggt Ugt1 Ugtr		15N only	15	UDP-glucose:glycoprotein glucosyltransferase 1 (UGT1) (EC 2.4.1.-) (UDP--Glc:glycoprotein glucosyltransferase) (UDP-glucose ceramide glucosyltransferase-like 1)
Q3U7R1	Esyt1 Fam62a Mbc2		15N only	13	Extended synaptotagmin-1 (E-Syt1) (Membrane-bound C2 domain-containing protein)
P08730	Krt13 Krt1-13		15N only	14	Keratin, type I cytoskeletal 13 (47 kDa cytokeratin) (Cytokeratin-13) (CK-13) (Keratin-13) (K13)
Q9D379	Ephx1		15N only	13	Epoxide hydrolase 1 (EC 3.3.2.9) (Epoxide hydratase) (Microsomal epoxide hydrolase) (mEH)
P30999	Ctnnd1 Catns Kiaa0384		15N only	15	Catenin delta-1 (Cadherin-associated Src substrate) (CAS) (p120 catenin) (p120(ctn)) (p120(cas))
P09470	Ace Dcp1		15N only	10	Angiotensin-converting enzyme (ACE) (EC 3.2.1.-) (EC 3.4.15.1) (Dipeptidyl carboxypeptidase I) (Kininase II) (CD antigen CD143) [Cleaved into: Angiotensin-converting enzyme, soluble form]
P33267	Cyp2f2 Cyp2f-2		15N only	10	Cytochrome P450 2F2 (EC 1.14.14.-) (CYPIIF2) (Cytochrome P450-NAH-2) (Naphthalene dehydrogenase) (Naphthalene hydroxylase)
Q640N1	Aebp1 Aclp		15N only	11	Adipocyte enhancer-binding protein 1 (AE-binding protein 1) (Aortic carboxypeptidase-like protein)
P43406	Itgav		15N only	8	Integrin alpha-V (Vitronectin receptor subunit alpha) (CD antigen CD51) [Cleaved into: Integrin alpha-V heavy chain; Integrin alpha-V light chain]
Q9WV27	Atp1a4 Atp1al2		15N only	14	Sodium/potassium-transporting ATPase subunit alpha-4 (Na(+)/K(+) ATPase alpha-4 subunit) (EC 3.6.3.9) (Sodium pump subunit alpha-4)
P70296	Pebp1 Pbp Pebp		15N only	12	Phosphatidylethanolamine-binding protein 1 (PEBP-1) (HCNPpp) [Cleaved into: Hippocampal cholinergic neurostimulating peptide (HCNP)]
P25444	Rps2 Llrep3 Rps4		15N only	14	40S ribosomal protein S2 (40S ribosomal protein S4) (Protein LLRep3)
P62962	Pfn1		15N only	9	Profilin-1 (Profilin I)
P35700	Prdx1 Msp23 Paga Tdpx2		15N only	10	Peroxiredoxin-1 (EC 1.11.1.15) (Macrophage 23 kDa stress protein) (Osteoblast-specific factor 3) (OSF-3) (Thioredoxin peroxidase 2) (Thioredoxin-dependent peroxide reductase 2)
P42932	Cct8 Cctq		15N only	14	T-complex protein 1 subunit theta (TCP-1-theta) (CCT-theta)
Q8CGC7	Eprs Qprs		15N only	9	Bifunctional glutamate/proline--tRNA ligase (Bifunctional aminoacyl-tRNA synthetase) [Includes: Glutamate--tRNA ligase (EC 6.1.1.17) (Glutamyl-tRNA synthetase) (GluRS); Proline--tRNA ligase (EC 6.1.1.15) (Prolyl-tRNA synthetase) (ProRS)]
P63325	Rps10		15N only	9	40S ribosomal protein S10
P62821	Rab1A Rab1		15N only	15	Ras-related protein Rab-1A (YPT1-related protein)
O88844	Idh1		15N only	9	Isocitrate dehydrogenase [NADP] cytoplasmic (IDH) (EC 1.1.1.42) (Cytosolic NADP-isocitrate dehydrogenase) (IDP) (NADP(+)-specific ICDH) (Oxalosuccinate decarboxylase)
P48722	Hspa4l Apg1 Hsp4l Osp94		15N only	7	Heat shock 70 kDa protein 4L (Heat shock 70-related protein APG-1) (Osmotic stress protein 94)
Q9WU78	Pdcd6ip Aip1 Alix		15N only	8	Programmed cell death 6-interacting protein (ALG-2-interacting protein 1) (ALG-2-interacting protein X) (E2F1-inducible protein) (Eig2)
P07309	Ttr		15N only	16	Transthyretin (Prealbumin)
Q9DCT2	Ndufs3		15N only	9	NADH dehydrogenase [ubiquinone] iron-sulfur protein 3, mitochondrial (EC 1.6.99.3) (EC 7.1.1.2) (Complex I-30kD) (CI-30kD) (NADH-ubiquinone oxidoreductase 30 kDa subunit)
Q9QYG0	Ndrg2 Kiaa1248 Ndr2		15N only	10	Protein NDRG2 (N-myc downstream-regulated gene 2 protein) (Protein Ndr2)
Q9Z2X1	Hnrnpf Hnrpf		15N only	9	Heterogeneous nuclear ribonucleoprotein F (hnRNP F) [Cleaved into: Heterogeneous nuclear ribonucleoprotein F, N-terminally processed]
Q91WD5	Ndufs2		15N only	7	NADH dehydrogenase [ubiquinone] iron-sulfur protein 2, mitochondrial (EC 1.6.99.3) (EC 7.1.1.2) (Complex I-49kD) (CI-49kD) (NADH-ubiquinone oxidoreductase 49 kDa subunit)
Q9CX86	Hnrnpa0 Hnrpa0		15N only	8	Heterogeneous nuclear ribonucleoprotein A0 (hnRNP A0)
P35486	Pdha1 Pdha-1		15N only	13	Pyruvate dehydrogenase E1 component subunit alpha, somatic form, mitochondrial (EC 1.2.4.1) (PDHE1-A type I)
Q9D1D4	Tmed10 Tmp21		15N only	7	Transmembrane emp24 domain-containing protein 10 (21 kDa transmembrane-trafficking protein) (Transmembrane protein Tmp21) (p24 family protein delta-1) (p24delta1)
Q9D1G1	Rab1b		15N only	9	Ras-related protein Rab-1B
Q9CQ19	Myl9 Myrl2		15N only	12	Myosin regulatory light polypeptide 9 (Myosin regulatory light chain 2, smooth muscle isoform) (Myosin regulatory light chain 9)
P84091	Ap2m1 Clapm1		15N only	7	AP-2 complex subunit mu (AP-2 mu chain) (Adaptor protein complex AP-2 subunit mu) (Adaptor-related protein complex 2 subunit mu) (Clathrin assembly protein complex 2 mu medium chain) (Clathrin coat assembly protein AP50) (Clathrin coat-associated protein AP50) (Mu2-adaptin) (Plasma membrane adaptor AP-2 50 kDa protein)
P53994	Rab2a Rab2		15N only	9	Ras-related protein Rab-2A
Q9D051	Pdhb		15N only	9	Pyruvate dehydrogenase E1 component subunit beta, mitochondrial (PDHE1-B) (EC 1.2.4.1)
Q5XG69	Fam169a Kiaa0888		15N only	8	Soluble lamin-associated protein of 75 kDa (SLAP75) (Protein FAM169A)
Q3THE2	Myl12b Mrlc2 Mylc2b		15N only	12	Myosin regulatory light chain 12B (Myosin regulatory light chain 2-B, smooth muscle isoform) (Myosin regulatory light chain 20 kDa) (MLC20) (Myosin regulatory light chain MRLC2)
Q3V3I2	Gnat3		15N only	8	Guanine nucleotide-binding protein G(t) subunit alpha-3 (Gustducin alpha-3 chain)
P97315	Csrp1 Crp1 Csrp		15N only	14	Cysteine and glycine-rich protein 1 (Cysteine-rich protein 1) (CRP) (CRP1)
Q9JLJ2	Aldh9a1		15N only	9	4-trimethylaminobutyraldehyde dehydrogenase (TMABADH) (EC 1.2.1.47) (Aldehyde dehydrogenase family 9 member A1) (EC 1.2.1.3)
Q99LC5	Etfa		15N only	9	Electron transfer flavoprotein subunit alpha, mitochondrial (Alpha-ETF)
A2AUC9	Klhl41 Kbtbd10		15N only	9	Kelch-like protein 41 (Kelch repeat and BTB domain-containing protein 10)
P17563	Selenbp1 Lpsb		15N only	9	Methanethiol oxidase (MTO) (EC 1.8.3.4) (56 kDa selenium-binding protein) (SBP56) (SP56) (Selenium-binding protein 1)
Q63836	Selenbp2 Lpsb2		15N only	9	Selenium-binding protein 2 (56 kDa acetaminophen-binding protein) (AP56)
Q9EP69	Sacm1l Kiaa0851 Sac1		15N only	8	Phosphatidylinositide phosphatase SAC1 (EC 3.1.3.-) (Suppressor of actin mutations 1-like protein)
P70372	Elavl1 Elra Hua		15N only	7	ELAV-like protein 1 (Elav-like generic protein) (Hu-antigen R) (HuR) (MelG)
Q6P5F9	Xpo1 Crm1		15N only	8	Exportin-1 (Exp1) (Chromosome region maintenance 1 protein homolog)
G5E829	Atp2b1		15N only	10	Plasma membrane calcium-transporting ATPase 1 (PMCA1) (EC 3.6.3.8) (Plasma membrane calcium ATPase isoform 1) (Plasma membrane calcium pump isoform 1)
P97370	Atp1b3		15N only	8	Sodium/potassium-transporting ATPase subunit beta-3 (Sodium/potassium-dependent ATPase subunit beta-3) (ATPB-3) (CD antigen CD298)
Q8BMK4	Ckap4		15N only	11	Cytoskeleton-associated protein 4 (63-kDa cytoskeleton-linking membrane protein) (Climp-63) (p63)
P11679	Krt8 Krt2-8		15N only	7	Keratin, type II cytoskeletal 8 (Cytokeratin endo A) (Cytokeratin-8) (CK-8) (Keratin-8) (K8) (Type-II keratin Kb8)
Q3UQ44	Iqgap2		15N only	7	Ras GTPase-activating-like protein IQGAP2
P08003	Pdia4 Cai Erp72		15N only	12	Protein disulfide-isomerase A4 (EC 5.3.4.1) (Endoplasmic reticulum resident protein 72) (ER protein 72) (ERp-72) (ERp72)
Q61702	Itih1		15N only	10	Inter-alpha-trypsin inhibitor heavy chain H1 (ITI heavy chain H1) (ITI-HC1) (Inter-alpha-inhibitor heavy chain 1)
P06909	Cfh Hf1		15N only	11	Complement factor H (Protein beta-1-H)
P01029	C4b C4		15N only	11	Complement C4-B [Cleaved into: Complement C4 beta chain; Complement C4 alpha chain; C4a anaphylatoxin; Complement C4 gamma chain]
P20918	Plg		15N only	8	Plasminogen (EC 3.4.21.7) [Cleaved into: Plasmin heavy chain A; Activation peptide; Angiostatin; Plasmin heavy chain A, short form; Plasmin light chain B]
P05784	Krt18 Kerd Krt1-18		15N only	12	Keratin, type I cytoskeletal 18 (Cytokeratin endo B) (Keratin D) (Cytokeratin-18) (CK-18) (Keratin-18) (K18)
Q9EQK5	Mvp		15N only	9	Major vault protein (MVP)
Q91YR9	Ptgr1 Ltb4dh		15N only	9	Prostaglandin reductase 1 (PRG-1) (EC 1.3.1.-) (15-oxoprostaglandin 13-reductase) (EC 1.3.1.48) (NADP-dependent leukotriene B4 12-hydroxydehydrogenase) (EC 1.3.1.74)
O70624	Myoc Tigr		15N only	11	Myocilin (Trabecular meshwork-induced glucocorticoid response protein) [Cleaved into: Myocilin, N-terminal fragment (Myocilin 20 kDa N-terminal fragment); Myocilin, C-terminal fragment (Myocilin 35 kDa N-terminal fragment)]
Q61495	Dsg1a Dsg1		15N only	10	Desmoglein-1-alpha (Desmoglein-1) (Dsg1-alpha) (DG1) (DGI) (Desmosomal glycoprotein I)
O89029	Matn4		15N only	13	Matrilin-4 (MAT-4)
P21956	Mfge8		15N only	7	Lactadherin (MFGM) (Milk fat globule-EGF factor 8) (MFG-E8) (SED1) (Sperm surface protein SP47) (MP47)
P47962	Rpl5		15N only	5	60S ribosomal protein L5
O35945	Aldh1a7 Aldh-pb		15N only	9	Aldehyde dehydrogenase, cytosolic 1 (EC 1.2.1.3) (ALDH class 1) (ALDH-E1) (ALHDII) (Aldehyde dehydrogenase family 1 member A7) (Aldehyde dehydrogenase phenobarbital-inducible)
Q9DBF1	Aldh7a1 Ald7a1		15N only	9	Alpha-aminoadipic semialdehyde dehydrogenase (Alpha-AASA dehydrogenase) (EC 1.2.1.31) (Aldehyde dehydrogenase family 7 member A1) (EC 1.2.1.3) (Antiquitin-1) (Betaine aldehyde dehydrogenase) (EC 1.2.1.8) (Delta1-piperideine-6-carboxylate dehydrogenase) (P6c dehydrogenase)
Q01768	Nme2		15N only	9	Nucleoside diphosphate kinase B (NDK B) (NDP kinase B) (EC 2.7.4.6) (Histidine protein kinase NDKB) (EC 2.7.13.3) (P18) (nm23-M2)
P14869	Rplp0 Arbp		15N only	8	60S acidic ribosomal protein P0 (60S ribosomal protein L10E)
P28474	Adh5 Adh-2 Adh2		15N only	10	Alcohol dehydrogenase class-3 (EC 1.1.1.1) (Alcohol dehydrogenase 2) (Alcohol dehydrogenase 5) (Alcohol dehydrogenase B2) (ADH-B2) (Alcohol dehydrogenase class-III) (Glutathione-dependent formaldehyde dehydrogenase) (FALDH) (FDH) (GSH-FDH) (EC 1.1.1.-) (S-(hydroxymethyl)glutathione dehydrogenase) (EC 1.1.1.284)
P54775	Psmc4 Tbp7		15N only	10	26S proteasome regulatory subunit 6B (26S proteasome AAA-ATPase subunit RPT3) (CIP21) (MB67-interacting protein) (MIP224) (Proteasome 26S subunit ATPase 4) (Tat-binding protein 7) (TBP-7)
Q9Z2U1	Psma5		15N only	7	Proteasome subunit alpha type-5 (EC 3.4.25.1) (Macropain zeta chain) (Multicatalytic endopeptidase complex zeta chain) (Proteasome zeta chain)
P14148	Rpl7		15N only	8	60S ribosomal protein L7
Q99PT1	Arhgdia C87222 Gdi1		15N only	8	Rho GDP-dissociation inhibitor 1 (Rho GDI 1) (GDI-1) (Rho-GDI alpha)
Q9QUI0	Rhoa Arha Arha2		15N only	8	Transforming protein RhoA
P12970	Rpl7a Surf-3 Surf3		15N only	10	60S ribosomal protein L7a (Surfeit locus protein 3)
Q9CVB6	Arpc2		15N only	10	Actin-related protein 2/3 complex subunit 2 (Arp2/3 complex 34 kDa subunit) (p34-ARC)
P26638	Sars Sars1 Sers		15N only	5	Serine--tRNA ligase, cytoplasmic (EC 6.1.1.11) (Seryl-tRNA synthetase) (SerRS) (Seryl-tRNA(Ser/Sec) synthetase)
P62334	Psmc6 Sug2		15N only	9	26S proteasome regulatory subunit 10B (26S proteasome AAA-ATPase subunit RPT4) (Proteasome 26S subunit ATPase 6) (Proteasome subunit p42)
P23116	Eif3a Csma Eif3 Eif3s10		15N only	9	Eukaryotic translation initiation factor 3 subunit A (eIF3a) (Centrosomin) (Eukaryotic translation initiation factor 3 subunit 10) (eIF-3-theta) (eIF3 p167) (eIF3 p180) (eIF3 p185) (p162)
P62835	Rap1a Krev-1		15N only	8	Ras-related protein Rap-1A (Ras-related protein Krev-1)
P51410	Rpl9		15N only	9	60S ribosomal protein L9
Q9R0Y5	Ak1		15N only	6	Adenylate kinase isoenzyme 1 (AK 1) (EC 2.7.4.3) (EC 2.7.4.6) (ATP-AMP transphosphorylase 1) (ATP:AMP phosphotransferase) (Adenylate monophosphate kinase) (Myokinase)
Q91V41	Rab14		15N only	7	Ras-related protein Rab-14
P24369	Ppib		15N only	8	Peptidyl-prolyl cis-trans isomerase B (PPIase B) (EC 5.2.1.8) (CYP-S1) (Cyclophilin B) (Rotamase B) (S-cyclophilin) (SCYLP)
Q9QXY6	Ehd3 Ehd2		15N only	7	EH domain-containing protein 3
O70194	Eif3d Eif3s7		15N only	11	Eukaryotic translation initiation factor 3 subunit D (eIF3d) (Eukaryotic translation initiation factor 3 subunit 7) (eIF-3-zeta) (eIF3 p66)
Q791V5	Mtch2		15N only	8	Mitochondrial carrier homolog 2
Q9JII6	Akr1a1 Akr1a4		15N only	7	Alcohol dehydrogenase [NADP(+)] (EC 1.1.1.2) (Aldehyde reductase) (Aldo-keto reductase family 1 member A1)
Q7TNP2	Ppp2r1b		15N only	6	Serine/threonine-protein phosphatase 2A 65 kDa regulatory subunit A beta isoform (PP2A subunit A isoform PR65-beta) (PP2A subunit A isoform R1-beta)
Q3TXS7	Psmd1		15N only	5	26S proteasome non-ATPase regulatory subunit 1 (26S proteasome regulatory subunit RPN2) (26S proteasome regulatory subunit S1)
Q9Z1Z0	Uso1 Vdp		15N only	7	General vesicular transport factor p115 (Protein USO1 homolog) (Transcytosis-associated protein) (TAP) (Vesicle-docking protein)
Q9QW08	Pdc Rpr1		15N only	9	Phosducin (PHD) (33 kDa phototransducing protein) (Rod photoreceptor 1) (RPR-1)
P0DP26	Calm1 Calm Cam Cam1		15N only	9	Calmodulin-1
P0DP27	Calm2 Cam2 CamC		15N only	9	Calmodulin-2
P0DP28	Calm3 Cam3 Camc		15N only	9	Calmodulin-3
P99027	Rplp2		15N only	6	60S acidic ribosomal protein P2
P70404	Idh3g		15N only	12	Isocitrate dehydrogenase [NAD] subunit gamma 1, mitochondrial (Isocitric dehydrogenase subunit gamma) (NAD(+)-specific ICDH subunit gamma)
Q60930	Vdac2 Vdac6		15N only	9	Voltage-dependent anion-selective channel protein 2 (VDAC-2) (mVDAC2) (Outer mitochondrial membrane protein porin 2) (Voltage-dependent anion-selective channel protein 6) (VDAC-6) (mVDAC6)
P32067	Ssb Ss-b		15N only	7	Lupus La protein homolog (La autoantigen homolog) (La ribonucleoprotein)
P60867	Rps20		15N only	7	40S ribosomal protein S20
P97447	Fhl1		15N only	9	Four and a half LIM domains protein 1 (FHL-1) (KyoT) (RBP-associated molecule 14-1) (RAM14-1) (Skeletal muscle LIM-protein 1) (SLIM) (SLIM-1)
Q60737	Csnk2a1 Ckiia		15N only	7	Casein kinase II subunit alpha (CK II alpha) (EC 2.7.11.1)
Q8BP92	Rcn2		15N only	11	Reticulocalbin-2 (Taipoxin-associated calcium-binding protein 49) (TCBP-49)
Q9D6R2	Idh3a		15N only	9	Isocitrate dehydrogenase [NAD] subunit alpha, mitochondrial (EC 1.1.1.41) (Isocitric dehydrogenase subunit alpha) (NAD(+)-specific ICDH subunit alpha)
Q61990	Pcbp2 Cbp Hnrnpx Hnrpx		15N only	9	Poly(rC)-binding protein 2 (Alpha-CP2) (CTBP) (CBP) (Putative heterogeneous nuclear ribonucleoprotein X) (hnRNP X)
P50149	Gnat2		15N only	6	Guanine nucleotide-binding protein G(t) subunit alpha-2 (Transducin alpha-2 chain)
P85094	Isoc2a Isoc2		15N only	8	Isochorismatase domain-containing protein 2A
P42125	Eci1 Dci		15N only	5	Enoyl-CoA delta isomerase 1, mitochondrial (EC 5.3.3.8) (3,2-trans-enoyl-CoA isomerase) (Delta(3),Delta(2)-enoyl-CoA isomerase) (D3,D2-enoyl-CoA isomerase) (Dodecenoyl-CoA isomerase)
Q9Z2I9	Sucla2		15N only	7	Succinate--CoA ligase [ADP-forming] subunit beta, mitochondrial (EC 6.2.1.5) (ATP-specific succinyl-CoA synthetase subunit beta) (A-SCS) (Succinyl-CoA synthetase beta-A chain) (SCS-betaA)
P30275	Ckmt1		15N only	7	Creatine kinase U-type, mitochondrial (EC 2.7.3.2) (Acidic-type mitochondrial creatine kinase) (Mia-CK) (Ubiquitous mitochondrial creatine kinase) (U-MtCK)
Q99KP6	Prpf19 Prp19 Snev		15N only	10	Pre-mRNA-processing factor 19 (EC 2.3.2.27) (Nuclear matrix protein 200) (PRP19/PSO4 homolog) (RING-type E3 ubiquitin transferase PRP19) (Senescence evasion factor)
Q9DC69	Ndufa9		15N only	6	NADH dehydrogenase [ubiquinone] 1 alpha subcomplex subunit 9, mitochondrial (Complex I-39kD) (CI-39kD) (NADH-ubiquinone oxidoreductase 39 kDa subunit)
P14873	Map1b Mtap1b Mtap5		15N only	8	Microtubule-associated protein 1B (MAP-1B) (MAP1(X)) (MAP1.2) [Cleaved into: MAP1B heavy chain; MAP1 light chain LC1]
Q9CQ62	Decr1		15N only	7	2,4-dienoyl-CoA reductase, mitochondrial (EC 1.3.1.34) (2,4-dienoyl-CoA reductase [NADPH]) (4-enoyl-CoA reductase [NADPH])
P56564	Slc1a3 Eaat1 Gmt1		15N only	10	Excitatory amino acid transporter 1 (Glial high affinity glutamate transporter) (High-affinity neuronal glutamate transporter) (GluT-1) (Sodium-dependent glutamate/aspartate transporter 1) (GLAST-1) (Solute carrier family 1 member 3)
Q62159	Rhoc Arhc		15N only	8	Rho-related GTP-binding protein RhoC (Silica-induced gene 61 protein) (SIG-61)
P50096	Impdh1		15N only	9	Inosine-5'-monophosphate dehydrogenase 1 (IMP dehydrogenase 1) (IMPD 1) (IMPDH 1) (EC 1.1.1.205) (IMPDH-I)
Q60605	Myl6 Myln		15N only	8	Myosin light polypeptide 6 (17 kDa myosin light chain) (LC17) (Myosin light chain 3) (MLC-3) (Myosin light chain alkali 3) (Myosin light chain A3) (Smooth muscle and nonmuscle myosin light chain alkali 6)
Q8CI51	Pdlim5 Enh		15N only	9	PDZ and LIM domain protein 5 (Enigma homolog) (Enigma-like PDZ and LIM domains protein)
P63330	Ppp2ca		15N only	7	Serine/threonine-protein phosphatase 2A catalytic subunit alpha isoform (PP2A-alpha) (EC 3.1.3.16)
Q9WUM5	Suclg1		15N only	7	Succinate--CoA ligase [ADP/GDP-forming] subunit alpha, mitochondrial (EC 6.2.1.4) (EC 6.2.1.5) (Succinyl-CoA synthetase subunit alpha) (SCS-alpha)
Q9JKB3	Ybx3 Csda Msy4		15N only	6	Y-box-binding protein 3 (Cold shock domain-containing protein A) (DNA-binding protein A) (Y-box protein 3)
Q3U0V1	Khsrp Fubp2		15N only	6	Far upstream element-binding protein 2 (FUSE-binding protein 2) (KH type-splicing regulatory protein) (KSRP)
Q9CQF9	Pcyox1 Kiaa0908		15N only	8	Prenylcysteine oxidase (EC 1.8.3.5)
Q99LF4	Rtcb D10Wsu52e		15N only	4	tRNA-splicing ligase RtcB homolog (EC 6.5.1.3) (Focal adhesion-associated protein) (FAAP)
Q9Z1G4	Atp6v0a1 Atp6n1		15N only	6	V-type proton ATPase 116 kDa subunit a isoform 1 (V-ATPase 116 kDa isoform a1) (Clathrin-coated vesicle/synaptic vesicle proton pump 116 kDa subunit) (Vacuolar adenosine triphosphatase subunit Ac116) (Vacuolar proton pump subunit 1) (Vacuolar proton translocating ATPase 116 kDa subunit a isoform 1)
P62192	Psmc1		15N only	7	26S proteasome regulatory subunit 4 (P26s4) (26S proteasome AAA-ATPase subunit RPT2) (Proteasome 26S subunit ATPase 1)
P35282	Rab21		15N only	7	Ras-related protein Rab-21 (Rab-12)
Q6P4T2	Snrnp200 Kiaa0788		15N only	6	U5 small nuclear ribonucleoprotein 200 kDa helicase (EC 3.6.4.13) (BRR2 homolog) (U5 snRNP-specific 200 kDa protein) (U5-200KD)
Q62318	Trim28 Kap1 Krip1 Tif1b		15N only	8	Transcription intermediary factor 1-beta (TIF1-beta) (E3 SUMO-protein ligase TRIM28) (EC 2.3.2.27) (KRAB-A-interacting protein) (KRIP-1) (RING-type E3 ubiquitin transferase TIF1-beta) (Tripartite motif-containing protein 28)
P47740	Aldh3a2 Ahd-3 Ahd3 Aldh3 Aldh4		15N only	10	Fatty aldehyde dehydrogenase (EC 1.2.1.3) (Aldehyde dehydrogenase 3) (Aldehyde dehydrogenase family 3 member A2)
Q9D0E1	Hnrnpm Hnrpm		15N only	6	Heterogeneous nuclear ribonucleoprotein M (hnRNP M)
Q00612	G6pdx G6pd G6pd-1		15N only	5	Glucose-6-phosphate 1-dehydrogenase X (G6PD) (EC 1.1.1.49)
Q62095	Ddx3y D1Pas1-rs1 Dead2		15N only	8	ATP-dependent RNA helicase DDX3Y (EC 3.6.4.13) (D1Pas1-related sequence 1) (DEAD box protein 3, Y-chromosomal) (DEAD-box RNA helicase DEAD2) (mDEAD2)
P16381	D1Pas1 Pl10		15N only	8	Putative ATP-dependent RNA helicase Pl10 (EC 3.6.4.13)
Q9EQ20	Aldh6a1		15N only	11	Methylmalonate-semialdehyde dehydrogenase [acylating], mitochondrial (MMSDH) (Malonate-semialdehyde dehydrogenase [acylating]) (EC 1.2.1.18) (EC 1.2.1.27) (Aldehyde dehydrogenase family 6 member A1)
Q3U1J4	Ddb1		15N only	6	DNA damage-binding protein 1 (DDB p127 subunit) (Damage-specific DNA-binding protein 1) (UV-damaged DNA-binding factor)
Q6PB66	Lrpprc Lrp130		15N only	8	Leucine-rich PPR motif-containing protein, mitochondrial (130 kDa leucine-rich protein) (LRP 130) (mLRP130)
Q99K51	Pls3		15N only	7	Plastin-3 (T-plastin)
P29341	Pabpc1 Pabp1		15N only	5	Polyadenylate-binding protein 1 (PABP-1) (Poly(A)-binding protein 1)
P17426	Ap2a1 Adtaa Clapa1		15N only	7	AP-2 complex subunit alpha-1 (100 kDa coated vesicle protein A) (Adaptor protein complex AP-2 subunit alpha-1) (Adaptor-related protein complex 2 subunit alpha-1) (Alpha-adaptin A) (Alpha1-adaptin) (Clathrin assembly protein complex 2 alpha-A large chain) (Plasma membrane adaptor HA2/AP2 adaptin alpha A subunit)
P06728	Apoa4		15N only	11	Apolipoprotein A-IV (Apo-AIV) (ApoA-IV) (Apolipoprotein A4)
Q6Q477	Atp2b4		15N only	6	Plasma membrane calcium-transporting ATPase 4 (PMCA4) (EC 3.6.3.8)
Q3UPL0	Sec31a Sec31l1		15N only	6	Protein transport protein Sec31A (SEC31-like protein 1) (SEC31-related protein A)
Q8BIJ6	Iars2		15N only	5	Isoleucine--tRNA ligase, mitochondrial (EC 6.1.1.5) (Isoleucyl-tRNA synthetase) (IleRS)
Q3TW96	Uap1l1		15N only	7	UDP-N-acetylhexosamine pyrophosphorylase-like protein 1 (EC 2.7.7.-)
Q91V61	Sfxn3		15N only	11	Sideroflexin-3
O54774	Ap3d1 Ap3d		15N only	8	AP-3 complex subunit delta-1 (AP-3 complex subunit delta) (Adaptor-related protein complex 3 subunit delta-1) (Delta-adaptin) (mBLVR1)
Q60854	Serpinb6 Serpinb6a Spi3		15N only	7	Serpin B6 (Placental thrombin inhibitor) (Proteinase inhibitor 6) (PI-6)
Q9QYB5	Add3 Addl		15N only	9	Gamma-adducin (Adducin-like protein 70)
Q01405	Sec23a Sec23 Sec23r		15N only	9	Protein transport protein Sec23A (SEC23-related protein A)
P09055	Itgb1		15N only	6	Integrin beta-1 (Fibronectin receptor subunit beta) (VLA-4 subunit beta) (CD antigen CD29)
P62908	Rps3		15N only	9	40S ribosomal protein S3 (EC 4.2.99.18)
P50285	Fmo1 Fmo-1		15N only	8	Dimethylaniline monooxygenase [N-oxide-forming] 1 (EC 1.14.13.8) (Dimethylaniline oxidase 1) (Hepatic flavin-containing monooxygenase 1) (FMO 1)
Q8K0E8	Fgb		15N only	7	Fibrinogen beta chain [Cleaved into: Fibrinopeptide B; Fibrinogen beta chain]
Q61739	Itga6		15N only	8	Integrin alpha-6 (CD49 antigen-like family member F) (VLA-6) (CD antigen CD49f) [Cleaved into: Integrin alpha-6 heavy chain; Integrin alpha-6 light chain]
Q9JMH6	Txnrd1 Trxr1		15N only	5	Thioredoxin reductase 1, cytoplasmic (TR) (EC 1.8.1.9) (Thioredoxin reductase TR1)
E9PVA8	Gcn1 Gcn1l1		15N only	5	eIF-2-alpha kinase activator GCN1 (GCN1 eIF-2-alpha kinase activator homolog) (GCN1-like protein 1) (General control of amino-acid synthesis 1-like protein 1) (Translational activator GCN1)
Q60604	Scin		15N only	7	Adseverin (Gelsolin-like protein) (Scinderin)
Q00915	Rbp1 Crbpi Rbp-1		15N only	4	Retinol-binding protein 1 (Cellular retinol-binding protein) (CRBP) (Cellular retinol-binding protein I) (CRBP-I) (mCRBPI)
P08074	Cbr2		15N only	10	Carbonyl reductase [NADPH] 2 (EC 1.1.1.184) (Adipocyte protein P27) (AP27) (Lung carbonyl reductase) (LCR) (NADPH-dependent carbonyl reductase 2)
Q8BK62	Olfml3		15N only	9	Olfactomedin-like protein 3
O35902	Dsg3		15N only	7	Desmoglein-3 (130 kDa pemphigus vulgaris antigen homolog)
O35074	Ptgis Cyp8		15N only	7	Prostacyclin synthase (EC 5.3.99.4) (Prostaglandin I2 synthase)
Q7TSF1	Dsg1b Dsg5		15N only	8	Desmoglein-1-beta (Dsg1-beta) (Desmoglein-5)
Q61398	Pcolce Pcpe1		15N only	8	Procollagen C-endopeptidase enhancer 1 (P14) (Procollagen COOH-terminal proteinase enhancer 1) (PCPE-1) (Procollagen C-proteinase enhancer 1) (Type 1 procollagen C-proteinase enhancer protein) (Type I procollagen COOH-terminal proteinase enhancer)
Q7TSF0	Dsg1c Dsg6		15N only	8	Desmoglein-1-gamma (Dsg1-gamma) (Desmoglein-6)
Q62433	Ndrg1 Ndr1 Ndrl Tdd5		15N only	6	Protein NDRG1 (N-myc downstream-regulated gene 1 protein) (Protein Ndr1)
P68510	Ywhah		15N only	10	14-3-3 protein eta
P80317	Cct6a Cct6 Cctz Cctz1		15N only	7	T-complex protein 1 subunit zeta (TCP-1-zeta) (CCT-zeta-1)
Q9EPL8	Ipo7 Ranbp7		15N only	4	Importin-7 (Imp7) (Ran-binding protein 7) (RanBP7)
Q9Z0N1	Eif2s3x		15N only	4	Eukaryotic translation initiation factor 2 subunit 3, X-linked (Eukaryotic translation initiation factor 2 subunit gamma, X-linked) (eIF-2-gamma X)
Q9Z0N2	Eif2s3y		15N only	4	Eukaryotic translation initiation factor 2 subunit 3, Y-linked (Eukaryotic translation initiation factor 2 subunit gamma, Y-linked) (eIF-2-gamma Y) (Spermatogonial proliferation factor) (Spy)
P62889	Rpl30		15N only	4	60S ribosomal protein L30
P34884	Mif		15N only	6	Macrophage migration inhibitory factor (MIF) (EC 5.3.2.1) (Delayed early response protein 6) (DER6) (Glycosylation-inhibiting factor) (GIF) (L-dopachrome isomerase) (L-dopachrome tautomerase) (EC 5.3.3.12) (Phenylpyruvate tautomerase)
Q9CZM2	Rpl15		15N only	6	60S ribosomal protein L15
Q9CQ60	Pgls		15N only	5	6-phosphogluconolactonase (6PGL) (EC 3.1.1.31)
Q9CPV4	Glod4		15N only	5	Glyoxalase domain-containing protein 4
Q8R016	Blmh		15N only	4	Bleomycin hydrolase (BH) (BLM hydrolase) (BMH) (EC 3.4.22.40)
Q8QZY1	Eif3l Eif3eip Eif3s6ip Paf67		15N only	5	Eukaryotic translation initiation factor 3 subunit L (eIF3l) (66 kDa tyrosine-rich heat shock protein) (67 kDa polymerase-associated factor) (Eukaryotic translation initiation factor 3 subunit 6-interacting protein) (Eukaryotic translation initiation factor 3 subunit E-interacting protein) (HSP-66Y) (PAF67)
P50247	Ahcy		15N only	4	Adenosylhomocysteinase (AdoHcyase) (EC 3.3.1.1) (CUBP) (Liver copper-binding protein) (S-adenosyl-L-homocysteine hydrolase)
Q9CZD3	Gars		15N only	5	Glycine--tRNA ligase (EC 3.6.1.17) (EC 6.1.1.14) (Diadenosine tetraphosphate synthetase) (AP-4-A synthetase) (Glycyl-tRNA synthetase) (GlyRS)
Q9Z1Q9	Vars Bat6 G7a Vars2		15N only	5	Valine--tRNA ligase (EC 6.1.1.9) (Protein G7a) (Valyl-tRNA synthetase) (ValRS)
P63028	Tpt1 Trt		15N only	4	Translationally-controlled tumor protein (TCTP) (21 kDa polypeptide) (p21) (p23)
P35979	Rpl12		15N only	6	60S ribosomal protein L12
P45376	Akr1b1 Akr1b3 Aldor1 Aldr1		15N only	5	Aldose reductase (AR) (EC 1.1.1.21) (Aldehyde reductase)
O55234	Psmb5		15N only	10	Proteasome subunit beta type-5 (EC 3.4.25.1) (Macropain epsilon chain) (Multicatalytic endopeptidase complex epsilon chain) (Proteasome chain 6) (Proteasome epsilon chain) (Proteasome subunit X)
Q9D7G0	Prps1		15N only	5	Ribose-phosphate pyrophosphokinase 1 (EC 2.7.6.1) (Phosphoribosyl pyrophosphate synthase I) (PRS-I)
Q9CS42	Prps2		15N only	5	Ribose-phosphate pyrophosphokinase 2 (EC 2.7.6.1) (Phosphoribosyl pyrophosphate synthase II) (PRS-II)
P50580	Pa2g4 Ebp1 Plfap		15N only	5	Proliferation-associated protein 2G4 (IRES-specific cellular trans-acting factor 45 kDa) (ITAF45) (Mpp1) (Proliferation-associated protein 1) (Protein p38-2G4)
Q61768	Kif5b Khcs Kns1		15N only	5	Kinesin-1 heavy chain (Conventional kinesin heavy chain) (Ubiquitous kinesin heavy chain) (UKHC)
Q60817	Naca		15N only	5	Nascent polypeptide-associated complex subunit alpha (Alpha-NAC) (Alpha-NAC/1.9.2)
Q99JI6	Rap1b		15N only	7	Ras-related protein Rap-1b (GTP-binding protein smg p21B)
Q9CQM9	Glrx3 Picot Txnl2		15N only	9	Glutaredoxin-3 (PKC-interacting cousin of thioredoxin) (PICOT) (PKC-theta-interacting protein) (PKCq-interacting protein) (Thioredoxin-like protein 2)
P62267	Rps23		15N only	7	40S ribosomal protein S23
P14131	Rps16		15N only	8	40S ribosomal protein S16
P11352	Gpx1		15N only	5	Glutathione peroxidase 1 (GPx-1) (GSHPx-1) (EC 1.11.1.9) (Cellular glutathione peroxidase) (Selenium-dependent glutathione peroxidase 1)
P63085	Mapk1 Erk2 Mapk Prkm1		15N only	5	Mitogen-activated protein kinase 1 (MAP kinase 1) (MAPK 1) (EC 2.7.11.24) (ERT1) (Extracellular signal-regulated kinase 2) (ERK-2) (MAP kinase isoform p42) (p42-MAPK) (Mitogen-activated protein kinase 2) (MAP kinase 2) (MAPK 2)
Q8JZQ9	Eif3b Eif3s9		15N only	5	Eukaryotic translation initiation factor 3 subunit B (eIF3b) (Eukaryotic translation initiation factor 3 subunit 9) (eIF-3-eta) (eIF3 p116)
Q922B2	Dars		15N only	4	Aspartate--tRNA ligase, cytoplasmic (EC 6.1.1.12) (Aspartyl-tRNA synthetase) (AspRS)
Q9D0I9	Rars		15N only	6	Arginine--tRNA ligase, cytoplasmic (EC 6.1.1.19) (Arginyl-tRNA synthetase) (ArgRS)
P70670	Naca Gm1878		15N only	5	Nascent polypeptide-associated complex subunit alpha, muscle-specific form (Alpha-NAC, muscle-specific form) (skNAC)
Q9QXK3	Copg2		15N only	5	Coatomer subunit gamma-2 (Gamma-2-coat protein) (Gamma-2-COP)
P20801	Tnnc2 Tncs		15N only	5	Troponin C, skeletal muscle (STNC)
P63044	Vamp2 Syb2		15N only	8	Vesicle-associated membrane protein 2 (VAMP-2) (Synaptobrevin-2)
P04247	Mb		15N only	9	Myoglobin
P51174	Acadl		15N only	10	Long-chain specific acyl-CoA dehydrogenase, mitochondrial (LCAD) (EC 1.3.8.8)
P46096	Syt1		15N only	5	Synaptotagmin-1 (Synaptotagmin I) (SytI) (p65)
Q9CQW2	Arl8b Arl10c Gie1		15N only	5	ADP-ribosylation factor-like protein 8B (ADP-ribosylation factor-like protein 10C) (Novel small G protein indispensable for equal chromosome segregation 1)
P50518	Atp6v1e1 Atp6e Atp6e2		15N only	5	V-type proton ATPase subunit E 1 (V-ATPase subunit E 1) (V-ATPase 31 kDa subunit) (p31) (Vacuolar proton pump subunit E 1)
Q60931	Vdac3		15N only	5	Voltage-dependent anion-selective channel protein 3 (VDAC-3) (mVDAC3) (Outer mitochondrial membrane protein porin 3)
P14094	Atp1b1 Atp4b		15N only	4	Sodium/potassium-transporting ATPase subunit beta-1 (Sodium/potassium-dependent ATPase subunit beta-1)
P63242	Eif5a		15N only	8	Eukaryotic translation initiation factor 5A-1 (eIF-5A-1) (eIF-5A1) (Eukaryotic initiation factor 5A isoform 1) (eIF-5A) (eIF-4D)
Q91VR2	Atp5f1c Atp5c1		15N only	6	ATP synthase subunit gamma, mitochondrial (ATP synthase F1 subunit gamma) (F-ATPase gamma subunit)
Q8K183	Pdxk Pkh		15N only	7	Pyridoxal kinase (EC 2.7.1.35) (Pyridoxine kinase)
P18872	Gnao1 Gna0 Gnao		15N only	6	Guanine nucleotide-binding protein G(o) subunit alpha
P60335	Pcbp1		15N only	8	Poly(rC)-binding protein 1 (Alpha-CP1) (Heterogeneous nuclear ribonucleoprotein E1) (hnRNP E1)
Q8VEM8	Slc25a3		15N only	8	Phosphate carrier protein, mitochondrial (Phosphate transport protein) (PTP) (Solute carrier family 25 member 3)
Q99K48	Nono		15N only	7	Non-POU domain-containing octamer-binding protein (NonO protein)
Q99L13	Hibadh		15N only	4	3-hydroxyisobutyrate dehydrogenase, mitochondrial (HIBADH) (EC 1.1.1.31)
Q9JK37	Myoz1		15N only	6	Myozenin-1 (Calsarcin-2) (Filamin-, actinin- and telethonin-binding protein) (Protein FATZ)
P56546	Ctbp2		15N only	6	C-terminal-binding protein 2 (CtBP2)
P51863	Atp6v0d1 Atp6d		15N only	6	V-type proton ATPase subunit d 1 (V-ATPase subunit d 1) (P39) (Physophilin) (V-ATPase 40 kDa accessory protein) (V-ATPase AC39 subunit) (Vacuolar proton pump subunit d 1)
Q07417	Acads		15N only	5	Short-chain specific acyl-CoA dehydrogenase, mitochondrial (SCAD) (EC 1.3.8.1) (Butyryl-CoA dehydrogenase)
P45952	Acadm		15N only	3	Medium-chain specific acyl-CoA dehydrogenase, mitochondrial (MCAD) (EC 1.3.8.7)
Q8BZ98	Dnm3 Kiaa0820		15N only	5	Dynamin-3 (EC 3.6.5.5)
Q3UEB3	Puf60		15N only	4	Poly(U)-binding-splicing factor PUF60 (60 kDa poly(U)-binding-splicing factor)
O35841	Api5		15N only	4	Apoptosis inhibitor 5 (API-5) (AAC-11)
P56959	Fus		15N only	6	RNA-binding protein FUS (Protein pigpen)
P53810	Pitpna Pitpn		15N only	11	Phosphatidylinositol transfer protein alpha isoform (PI-TP-alpha) (PtdIns transfer protein alpha) (PtdInsTP alpha)
P61358	Rpl27		15N only	3	60S ribosomal protein L27
P17809	Slc2a1 Glut-1 Glut1		15N only	5	Solute carrier family 2, facilitated glucose transporter member 1 (Glucose transporter type 1, erythrocyte/brain) (GLUT-1) (GT1)
O88712	Ctbp1		15N only	6	C-terminal-binding protein 1 (CtBP1) (EC 1.1.1.-)
P62715	Ppp2cb		15N only	6	Serine/threonine-protein phosphatase 2A catalytic subunit beta isoform (PP2A-beta) (EC 3.1.3.16)
Q60864	Stip1		15N only	5	Stress-induced-phosphoprotein 1 (STI1) (mSTI1) (Hsc70/Hsp90-organizing protein) (Hop)
Q99JR5	Tinagl1 Arg1 Lcn7 Tinagl		15N only	7	Tubulointerstitial nephritis antigen-like (Adrenocortical zonation factor 1) (AZ-1) (Androgen-regulated gene 1 protein) (Tubulointerstitial nephritis antigen-related protein) (TARP)
Q8BGH2	Samm50		15N only	5	Sorting and assembly machinery component 50 homolog
Q9Z1F9	Uba2 Sae2 Uble1b		15N only	7	SUMO-activating enzyme subunit 2 (EC 2.3.2.-) (Anthracycline-associated resistance ARX) (Ubiquitin-like 1-activating enzyme E1B) (Ubiquitin-like modifier-activating enzyme 2)
Q9DBE8	Alg2 MNCb-5081		15N only	4	Alpha-1,3/1,6-mannosyltransferase ALG2 (EC 2.4.1.132) (EC 2.4.1.257) (Asparagine-linked glycosylation protein 2 homolog) (GDP-Man:Man(1)GlcNAc(2)-PP-Dol alpha-1,3-mannosyltransferase) (GDP-Man:Man(1)GlcNAc(2)-PP-dolichol mannosyltransferase) (GDP-Man:Man(2)GlcNAc(2)-PP-Dol alpha-1,6-mannosyltransferase)
Q921H8	Acaa1a Acaa1		15N only	6	3-ketoacyl-CoA thiolase A, peroxisomal (EC 2.3.1.16) (Acetyl-CoA acyltransferase A) (Beta-ketothiolase A) (Peroxisomal 3-oxoacyl-CoA thiolase A)
Q6PHZ2	Camk2d Kiaa4163		15N only	4	Calcium/calmodulin-dependent protein kinase type II subunit delta (CaM kinase II subunit delta) (CaMK-II subunit delta) (EC 2.7.11.17)
O35609	Scamp3		15N only	6	Secretory carrier-associated membrane protein 3 (Secretory carrier membrane protein 3)
P42208	Sept2 Nedd-5 Nedd5		15N only	7	Septin-2 (Neural precursor cell expressed developmentally down-regulated protein 5) (NEDD-5)
P18572	Bsg		15N only	6	Basigin (Basic immunoglobulin superfamily) (HT7 antigen) (Membrane glycoprotein gp42) (CD antigen CD147)
P24270	Cat Cas-1 Cas1		15N only	6	Catalase (EC 1.11.1.6)
Q8CGK3	Lonp1 Prss15		15N only	3	Lon protease homolog, mitochondrial (EC 3.4.21.53) (Lon protease-like protein) (LONP) (Mitochondrial ATP-dependent protease Lon) (Serine protease 15)
O55131	Sept7 Cdc10		15N only	5	Septin-7 (CDC10 protein homolog)
Q9DBB8	Dhdh		15N only	5	Trans-1,2-dihydrobenzene-1,2-diol dehydrogenase (EC 1.3.1.20) (D-xylose 1-dehydrogenase) (D-xylose-NADP dehydrogenase) (EC 1.1.1.179) (Dimeric dihydrodiol dehydrogenase)
Q8BP47	Nars		15N only	5	Asparagine--tRNA ligase, cytoplasmic (EC 6.1.1.22) (Asparaginyl-tRNA synthetase) (AsnRS)
Q61548	Snap91		15N only	5	Clathrin coat assembly protein AP180 (91 kDa synaptosomal-associated protein) (Clathrin coat-associated protein AP180) (Phosphoprotein F1-20)
Q8BFZ9	Erlin2 Spfh2		15N only	5	Erlin-2 (Endoplasmic reticulum lipid raft-associated protein 2) (Stomatin-prohibitin-flotillin-HflC/K domain-containing protein 2) (SPFH domain-containing protein 2)
Q9WUM4	Coro1c		15N only	6	Coronin-1C (Coronin-3)
P62315	Snrpd1		15N only	9	Small nuclear ribonucleoprotein Sm D1 (Sm-D1) (Sm-D autoantigen) (snRNP core protein D1)
Q8BVE3	Atp6v1h		15N only	4	V-type proton ATPase subunit H (V-ATPase subunit H) (Vacuolar proton pump subunit H)
O08810	Eftud2 Snrp116		15N only	4	116 kDa U5 small nuclear ribonucleoprotein component (Elongation factor Tu GTP-binding domain-containing protein 2) (U5 snRNP-specific protein, 116 kDa) (U5-116 kDa)
P34914	Ephx2 Eph2		15N only	5	Bifunctional epoxide hydrolase 2 [Includes: Cytosolic epoxide hydrolase 2 (CEH) (EC 3.3.2.10) (Epoxide hydratase) (Soluble epoxide hydrolase) (SEH); Lipid-phosphate phosphatase (EC 3.1.3.76)]
P27546	Map4 Mtap4		15N only	3	Microtubule-associated protein 4 (MAP-4)
Q8VCH0	Acaa1b Acaa1		15N only	6	3-ketoacyl-CoA thiolase B, peroxisomal (EC 2.3.1.16) (Acetyl-CoA acyltransferase B) (Beta-ketothiolase B) (Peroxisomal 3-oxoacyl-CoA thiolase B)
Q9ESZ8	Gtf2i Bap135 Diws1t		15N only	3	General transcription factor II-I (GTFII-I) (TFII-I) (Bruton tyrosine kinase-associated protein 135) (BAP-135) (BTK-associated protein 135)
Q61937	Npm1		15N only	4	Nucleophosmin (NPM) (Nucleolar phosphoprotein B23) (Nucleolar protein NO38) (Numatrin)
P97429	Anxa4 Anx4		15N only	6	Annexin A4 (Annexin IV) (Annexin-4)
P61161	Actr2 Arp2		15N only	5	Actin-related protein 2 (Actin-like protein 2)
Q9WV54	Asah1 Asah		15N only	5	Acid ceramidase (AC) (ACDase) (Acid CDase) (EC 3.5.1.23) (Acylsphingosine deacylase) (N-acylsphingosine amidohydrolase) [Cleaved into: Acid ceramidase subunit alpha; Acid ceramidase subunit beta]
O35600	Abca4 Abcr		15N only	3	Retinal-specific ATP-binding cassette transporter (ATP-binding cassette sub-family A member 4) (RIM ABC transporter) (RIM protein) (RmP)
P46412	Gpx3		15N only	4	Glutathione peroxidase 3 (GPx-3) (GSHPx-3) (EC 1.11.1.9) (Plasma glutathione peroxidase) (GPx-P) (GSHPx-P)
Q9D2G2	Dlst		15N only	5	Dihydrolipoyllysine-residue succinyltransferase component of 2-oxoglutarate dehydrogenase complex, mitochondrial (EC 2.3.1.61) (2-oxoglutarate dehydrogenase complex component E2) (OGDC-E2) (Dihydrolipoamide succinyltransferase component of 2-oxoglutarate dehydrogenase complex) (E2K)
Q8BIW1	Prune1 Prune		15N only	5	Exopolyphosphatase PRUNE1 (EC 3.6.1.1) (PRUNEM1)
Q3UHJ0	Aak1 Kiaa1048		15N only	6	AP2-associated protein kinase 1 (EC 2.7.11.1) (Adaptor-associated kinase 1)
Q9CZN7	Shmt2		15N only	6	Serine hydroxymethyltransferase, mitochondrial (SHMT) (EC 2.1.2.1) (Glycine hydroxymethyltransferase) (Serine methylase)
O55029	Copb2		15N only	8	Coatomer subunit beta' (Beta'-coat protein) (Beta'-COP) (p102)
Q921M3	Sf3b3 Kiaa0017		15N only	6	Splicing factor 3B subunit 3 (Pre-mRNA-splicing factor SF3b 130 kDa subunit) (SF3b130) (Spliceosome-associated protein 130) (SAP 130)
Q9Z0X1	Aifm1 Aif Pdcd8		15N only	4	Apoptosis-inducing factor 1, mitochondrial (EC 1.1.1.-) (Programmed cell death protein 8)
Q08642	Padi2 Pad2 Pdi Pdi2		15N only	4	Protein-arginine deiminase type-2 (EC 3.5.3.15) (Peptidylarginine deiminase II) (Protein-arginine deiminase type II)
Q9DBS1	Tmem43		15N only	5	Transmembrane protein 43 (Protein LUMA)
Q7TMB8	Cyfip1 Kiaa0068 Shyc Sra1		15N only	6	Cytoplasmic FMR1-interacting protein 1 (Specifically Rac1-associated protein 1) (Sra-1)
Q8C522	Endod1 Kiaa0830		15N only	6	Endonuclease domain-containing 1 protein (EC 3.1.30.-)
E9PZQ0	Ryr1		15N only	4	Ryanodine receptor 1 (RYR-1) (RyR1) (Skeletal muscle calcium release channel) (Skeletal muscle ryanodine receptor) (Skeletal muscle-type ryanodine receptor) (Type 1 ryanodine receptor)
Q61543	Glg1 Esl1 Mg160 Selel		15N only	7	Golgi apparatus protein 1 (E-selectin ligand 1) (ESL-1) (Selel) (Golgi sialoglycoprotein MG-160)
Q99104	Myo5a Dilute		15N only	5	Unconventional myosin-Va (Dilute myosin heavy chain, non-muscle)
Q8R1B4	Eif3c Eif3s8		15N only	3	Eukaryotic translation initiation factor 3 subunit C (eIF3c) (Eukaryotic translation initiation factor 3 subunit 8) (eIF3 p110)
Q9EPU0	Upf1 Rent1		15N only	5	Regulator of nonsense transcripts 1 (EC 3.6.4.-) (ATP-dependent helicase RENT1) (Nonsense mRNA reducing factor 1) (NORF1) (Up-frameshift suppressor 1 homolog) (mUpf1)
A2AN08	Ubr4 Kiaa0462 Zubr1		15N only	4	E3 ubiquitin-protein ligase UBR4 (EC 2.3.2.27) (N-recognin-4) (RING-type E3 ubiquitin transferase UBR4) (Zinc finger UBR1-type protein 1) (p600)
P19783	Cox4i1 Cox4 Cox4a		15N only	8	Cytochrome c oxidase subunit 4 isoform 1, mitochondrial (Cytochrome c oxidase polypeptide IV) (Cytochrome c oxidase subunit IV isoform 1) (COX IV-1)
O54734	Ddost		15N only	4	Dolichyl-diphosphooligosaccharide--protein glycosyltransferase 48 kDa subunit (DDOST 48 kDa subunit) (Oligosaccharyl transferase 48 kDa subunit)
Q8BLF1	Nceh1 Aadacl1 Kiaa1363		15N only	3	Neutral cholesterol ester hydrolase 1 (NCEH) (EC 3.1.1.-) (Arylacetamide deacetylase-like 1) (Chlorpyrifos oxon-binding protein) (CPO-BP)
Q91YH5	Atl3		15N only	5	Atlastin-3 (EC 3.6.5.-)
Q64435	Ugt1a6 Ugt1 Ugt1a6a Ugt1a7		15N only	4	UDP-glucuronosyltransferase 1-6 (UDPGT 1-6) (UGT1*6) (UGT1-06) (UGT1.6) (EC 2.4.1.17) (Phenol UDP-glucuronosyltransferase) (UDP-glucuronosyltransferase 1A6) (UGT1A6) (UGP1A1) (UGT1A7)
O88322	Nid2		15N only	5	Nidogen-2 (NID-2) (Entactin-2)
Q07076	Anxa7 Anx7		15N only	6	Annexin A7 (Annexin VII) (Annexin-7) (Synexin)
Q9R069	Bcam Gplu Lu		15N only	6	Basal cell adhesion molecule (B-CAM cell surface glycoprotein) (Lutheran antigen) (CD antigen CD239)
P53395	Dbt		15N only	6	Lipoamide acyltransferase component of branched-chain alpha-keto acid dehydrogenase complex, mitochondrial (EC 2.3.1.168) (Branched-chain alpha-keto acid dehydrogenase complex component E2) (BCKAD-E2) (BCKADE2) (Dihydrolipoamide acetyltransferase component of branched-chain alpha-keto acid dehydrogenase complex) (Dihydrolipoamide branched chain transacylase) (Dihydrolipoyllysine-residue (2-methyl…
E9Q7G0	Numa1		15N only	3	Nuclear mitotic apparatus protein 1 (Nuclear mitotic apparatus protein) (NuMA protein)
Q9D1Q6	Erp44 Kiaa0573 Txndc4		15N only	6	Endoplasmic reticulum resident protein 44 (ER protein 44) (ERp44) (Thioredoxin domain-containing protein 4)
O55222	Ilk		15N only	3	Integrin-linked protein kinase (EC 2.7.11.1)
Q8VCW8	Acsf2		15N only	6	Acyl-CoA synthetase family member 2, mitochondrial (EC 6.2.1.-)
Q5I2A0	Serpina3g Spi2A		15N only	5	Serine protease inhibitor A3G (Serpin A3G) (Serine protease inhibitor 2A) (Serpin 2A)
Q71LX4	Tln2		15N only	5	Talin-2
O70475	Ugdh		15N only	5	UDP-glucose 6-dehydrogenase (UDP-Glc dehydrogenase) (UDP-GlcDH) (UDPGDH) (EC 1.1.1.22)
Q99L04	Dhrs1 D14ertd484e		15N only	4	Dehydrogenase/reductase SDR family member 1 (EC 1.1.-.-)
Q02819	Nucb1 Nuc Nucb		15N only	6	Nucleobindin-1 (CALNUC)
P32261	Serpinc1 At3		15N only	7	Antithrombin-III (ATIII) (Serpin C1)
Q8VCT3	Rnpep		15N only	4	Aminopeptidase B (AP-B) (EC 3.4.11.6) (Arginine aminopeptidase) (Arginyl aminopeptidase) (Cytosol aminopeptidase IV)
Q01279	Egfr		15N only	5	Epidermal growth factor receptor (EC 2.7.10.1)
P49586	Pcyt1a Ctpct Pcyt1		15N only	5	Choline-phosphate cytidylyltransferase A (EC 2.7.7.15) (CCT-alpha) (CTP:phosphocholine cytidylyltransferase A) (CCT A) (CT A) (Phosphorylcholine transferase A)
P16045	Lgals1 Gbp		15N only	6	Galectin-1 (Gal-1) (14 kDa lectin) (Beta-galactoside-binding lectin L-14-I) (Galaptin) (Lactose-binding lectin 1) (Lectin galactoside-binding soluble 1) (S-Lac lectin 1)
Q01339	Apoh B2gp1		15N only	7	Beta-2-glycoprotein 1 (APC inhibitor) (Activated protein C-binding protein) (Apolipoprotein H) (Apo-H) (Beta-2-glycoprotein I) (B2GPI) (Beta(2)GPI)
P97290	Serping1 C1nh		15N only	5	Plasma protease C1 inhibitor (C1 Inh) (C1Inh) (C1 esterase inhibitor) (C1-inhibiting factor) (Serpin G1)
Q9Z204	Hnrnpc Hnrpc		15N only	4	Heterogeneous nuclear ribonucleoproteins C1/C2 (hnRNP C1/C2)
Q9DBR7	Ppp1r12a Mypt1		15N only	6	Protein phosphatase 1 regulatory subunit 12A (Myosin phosphatase-targeting subunit 1) (Myosin phosphatase target subunit 1)
A2A863	Itgb4		15N only	6	Integrin beta-4 (CD antigen CD104)
Q9D6P8	Calml3		15N only	4	Calmodulin-like protein 3
Q09PK2	Asprv1 Sasp Taps		15N only	5	Retroviral-like aspartic protease 1 (EC 3.4.23.-) (Skin-specific retroviral-like aspartic protease) (SASPase) (Skin aspartic protease) (TPA-inducible aspartic proteinase-like protein)
Q07563	Col17a1 Bp180 Bpag2		15N only	7	Collagen alpha-1(XVII) chain (180 kDa bullous pemphigoid antigen 2) (Bullous pemphigoid antigen 2) [Cleaved into: 120 kDa linear IgA disease antigen homolog]
Q61171	Prdx2 Tdpx1 Tpx		15N only	4	Peroxiredoxin-2 (EC 1.11.1.15) (Thiol-specific antioxidant protein) (TSA) (Thioredoxin peroxidase 1) (Thioredoxin-dependent peroxide reductase 1)
Q9R1P1	Psmb3		15N only	3	Proteasome subunit beta type-3 (EC 3.4.25.1) (Proteasome chain 13) (Proteasome component C10-II) (Proteasome theta chain)
Q61301	Ctnna2 Catna2		15N only	4	Catenin alpha-2 (Alpha N-catenin)
P98203	Arvcf		15N only	3	Armadillo repeat protein deleted in velo-cardio-facial syndrome homolog
Q78ZA7	Nap1l4		15N only	3	Nucleosome assembly protein 1-like 4
P62827	Ran Rasl2-8		15N only	3	GTP-binding nuclear protein Ran (GTPase Ran) (Ras-like protein TC4) (Ras-related nuclear protein)
Q920E5	Fdps		15N only	6	Farnesyl pyrophosphate synthase (FPP synthase) (FPS) (EC 2.5.1.10) ((2E,6E)-farnesyl diphosphate synthase) (Cholesterol-regulated 39 kDa protein) (CR 39) (Dimethylallyltranstransferase) (EC 2.5.1.1) (Farnesyl diphosphate synthase) (Geranyltranstransferase)
Q6ZWV3	Rpl10 Qm		15N only	4	60S ribosomal protein L10 (Protein QM homolog) (Ribosomal protein L10)
Q9DCH4	Eif3f Eif3s5		15N only	3	Eukaryotic translation initiation factor 3 subunit F (eIF3f) (Deubiquitinating enzyme eIF3f) (EC 3.4.19.12) (Eukaryotic translation initiation factor 3 subunit 5) (eIF-3-epsilon) (eIF3 p47)
Q61553	Fscn1 Fan1 Snl		15N only	4	Fascin (Singed-like protein)
P62082	Rps7		15N only	4	40S ribosomal protein S7
Q3ULJ0	Gpd1l Kiaa0089		15N only	4	Glycerol-3-phosphate dehydrogenase 1-like protein (EC 1.1.1.8)
O88544	Cops4 Csn4		15N only	3	COP9 signalosome complex subunit 4 (SGN4) (Signalosome subunit 4) (JAB1-containing signalosome subunit 4)
Q7TQI3	Otub1		15N only	3	Ubiquitin thioesterase OTUB1 (EC 3.4.19.12) (Deubiquitinating enzyme OTUB1) (OTU domain-containing ubiquitin aldehyde-binding protein 1) (Otubain-1) (Ubiquitin-specific-processing protease OTUB1)
P47911	Rpl6		15N only	7	60S ribosomal protein L6 (TAX-responsive enhancer element-binding protein 107) (TAXREB107)
P97372	Psme2 Pa28b1		15N only	6	Proteasome activator complex subunit 2 (11S regulator complex subunit beta) (REG-beta) (Activator of multicatalytic protease subunit 2) (Proteasome activator 28 subunit beta) (PA28b) (PA28beta)
P97461	Rps5		15N only	4	40S ribosomal protein S5 [Cleaved into: 40S ribosomal protein S5, N-terminally processed]
Q9WVJ2	Psmd13		15N only	2	26S proteasome non-ATPase regulatory subunit 13 (26S proteasome regulatory subunit RPN9) (26S proteasome regulatory subunit S11) (26S proteasome regulatory subunit p40.5)
Q9QUM9	Psma6		15N only	2	Proteasome subunit alpha type-6 (EC 3.4.25.1) (Macropain iota chain) (Multicatalytic endopeptidase complex iota chain) (Proteasome iota chain)
O08917	Flot1		15N only	3	Flotillin-1
P67984	Rpl22		15N only	5	60S ribosomal protein L22 (Heparin-binding protein HBp15)
P61202	Cops2 Csn2 Trip15		15N only	4	COP9 signalosome complex subunit 2 (SGN2) (Signalosome subunit 2) (Alien homolog) (JAB1-containing signalosome subunit 2) (Thyroid receptor-interacting protein 15) (TR-interacting protein 15) (TRIP-15)
P62849	Rps24		15N only	3	40S ribosomal protein S24
Q61206	Pafah1b2 Pafahb		15N only	4	Platelet-activating factor acetylhydrolase IB subunit beta (EC 3.1.1.47) (PAF acetylhydrolase 30 kDa subunit) (PAF-AH 30 kDa subunit) (PAF-AH subunit beta) (PAFAH subunit beta)
Q91WK2	Eif3h Eif3s3		15N only	5	Eukaryotic translation initiation factor 3 subunit H (eIF3h) (Eukaryotic translation initiation factor 3 subunit 3) (eIF-3-gamma) (eIF3 p40 subunit)
Q99K85	Psat1 Psa Psat		15N only	5	Phosphoserine aminotransferase (PSAT) (EC 2.6.1.52) (Endometrial progesterone-induced protein) (EPIP) (Phosphohydroxythreonine aminotransferase)
P35980	Rpl18		15N only	3	60S ribosomal protein L18
P46638	Rab11b		15N only	5	Ras-related protein Rab-11B
P09671	Sod2 Sod-2		15N only	2	Superoxide dismutase [Mn], mitochondrial (EC 1.15.1.1)
P97371	Psme1		15N only	3	Proteasome activator complex subunit 1 (11S regulator complex subunit alpha) (REG-alpha) (Activator of multicatalytic protease subunit 1) (Proteasome activator 28 subunit alpha) (PA28a) (PA28alpha)
O88456	Capns1 Capn4		15N only	4	Calpain small subunit 1 (CSS1) (Calcium-activated neutral proteinase small subunit) (CANP small subunit) (Calcium-dependent protease small subunit) (CDPS) (Calcium-dependent protease small subunit 1) (Calpain regulatory subunit)
Q9D819	Ppa1 Pp Pyp		15N only	4	Inorganic pyrophosphatase (EC 3.6.1.1) (Pyrophosphate phospho-hydrolase) (PPase)
P42669	Pura		15N only	3	Transcriptional activator protein Pur-alpha (Purine-rich single-stranded DNA-binding protein alpha)
Q9DBC7	Prkar1a		15N only	7	cAMP-dependent protein kinase type I-alpha regulatory subunit [Cleaved into: cAMP-dependent protein kinase type I-alpha regulatory subunit, N-terminally processed]
Q3UX10	Tubal3		15N only	3	Tubulin alpha chain-like 3
O70325	Gpx4		15N only	2	Phospholipid hydroperoxide glutathione peroxidase (PHGPx) (EC 1.11.1.12) (Glutathione peroxidase 4) (GPx-4) (GSHPx-4)
Q8C0C7	Farsa Farsla		15N only	3	Phenylalanine--tRNA ligase alpha subunit (EC 6.1.1.20) (Phenylalanyl-tRNA synthetase alpha subunit) (PheRS)
P48758	Cbr1 Cbr		15N only	3	Carbonyl reductase [NADPH] 1 (EC 1.1.1.184) (15-hydroxyprostaglandin dehydrogenase [NADP(+)]) (EC 1.1.1.197) (NADPH-dependent carbonyl reductase 1) (Prostaglandin 9-ketoreductase) (Prostaglandin-E(2) 9-reductase) (EC 1.1.1.189)
O89079	Cope Cope1		15N only	5	Coatomer subunit epsilon (Epsilon-coat protein) (Epsilon-COP)
P47199	Cryz		15N only	3	Quinone oxidoreductase (EC 1.6.5.5) (NADPH:quinone reductase) (Zeta-crystallin)
Q9JLV5	Cul3		15N only	3	Cullin-3 (CUL-3)
Q9Z2W0	Dnpep		15N only	3	Aspartyl aminopeptidase (EC 3.4.11.21)
Q8BJY1	Psmd5 Kiaa0072		15N only	4	26S proteasome non-ATPase regulatory subunit 5 (26S protease subunit S5 basic) (26S proteasome subunit S5B)
Q8BMJ2	Lars		15N only	3	Leucine--tRNA ligase, cytoplasmic (EC 6.1.1.4) (Leucyl-tRNA synthetase) (LeuRS)
P13412	Tnni2		15N only	8	Troponin I, fast skeletal muscle (Troponin I, fast-twitch isoform)
P63024	Vamp3 Syb3		15N only	6	Vesicle-associated membrane protein 3 (VAMP-3) (Cellubrevin) (CEB) (Synaptobrevin-3)
Q91WS0	Cisd1 D10Ertd214e Zcd1		15N only	4	CDGSH iron-sulfur domain-containing protein 1 (MitoNEET)
P60904	Dnajc5		15N only	4	DnaJ homolog subfamily C member 5 (Cysteine string protein) (CSP)
Q9CPQ8	Atp5mg Atp5l		15N only	4	ATP synthase subunit g, mitochondrial (ATPase subunit g) (ATP synthase membrane subunit g)
P61264	Stx1b Stx1b1 Stx1b2		15N only	3	Syntaxin-1B
Q8BYK4	Rdh12		15N only	3	Retinol dehydrogenase 12 (EC 1.1.1.-)
O35381	Anp32a Anp32 Lanp		15N only	3	Acidic leucine-rich nuclear phosphoprotein 32 family member A (Acidic nuclear phosphoprotein pp32) (Leucine-rich acidic nuclear protein) (LANP) (Potent heat-stable protein phosphatase 2A inhibitor I1PP2A)
P28663	Napb Snapb		15N only	6	Beta-soluble NSF attachment protein (SNAP-beta) (Brain protein I47) (N-ethylmaleimide-sensitive factor attachment protein beta)
Q9DCS9	Ndufb10		15N only	5	NADH dehydrogenase [ubiquinone] 1 beta subcomplex subunit 10 (Complex I-PDSW) (CI-PDSW) (NADH-ubiquinone oxidoreductase PDSW subunit)
Q9CQJ8	Ndufb9		15N only	3	NADH dehydrogenase [ubiquinone] 1 beta subcomplex subunit 9 (Complex I-B22) (CI-B22) (NADH-ubiquinone oxidoreductase B22 subunit)
P63276	Rps17		15N only	3	40S ribosomal protein S17
P35278	Rab5c		15N only	4	Ras-related protein Rab-5C
P35293	Rab18		15N only	4	Ras-related protein Rab-18
P62320	Snrpd3		15N only	6	Small nuclear ribonucleoprotein Sm D3 (Sm-D3) (snRNP core protein D3)
Q9R0Q7	Ptges3 Sid3177 Tebp		15N only	3	Prostaglandin E synthase 3 (EC 5.3.99.3) (Cytosolic prostaglandin E2 synthase) (cPGES) (Hsp90 co-chaperone) (Progesterone receptor complex p23) (Sid 3177) (Telomerase-binding protein p23)
P34057	Rcvrn Rcv1		15N only	5	Recoverin (23 kDa photoreceptor cell-specific protein) (Cancer-associated retinopathy protein) (Protein CAR)
P57722	Pcbp3		15N only	6	Poly(rC)-binding protein 3 (Alpha-CP3)
P67778	Phb		15N only	4	Prohibitin (B-cell receptor-associated protein 32) (BAP 32)
Q8K3J1	Ndufs8		15N only	5	NADH dehydrogenase [ubiquinone] iron-sulfur protein 8, mitochondrial (EC 1.6.99.3) (EC 7.1.1.2) (Complex I-23kD) (CI-23kD) (NADH-ubiquinone oxidoreductase 23 kDa subunit)
P14231	Atp1b2		15N only	3	Sodium/potassium-transporting ATPase subunit beta-2 (Adhesion molecule in glia) (AMOG) (Sodium/potassium-dependent ATPase subunit beta-2)
O55022	Pgrmc1 Pgrmc		15N only	6	Membrane-associated progesterone receptor component 1 (mPR)
Q9CXY6	Ilf2 Nf45		15N only	4	Interleukin enhancer-binding factor 2 (Nuclear factor of activated T-cells 45 kDa)
Q9CQE8	RTRAF		15N only	4	RNA transcription, translation and transport factor protein
Q00623	Apoa1		15N only	4	Apolipoprotein A-I (Apo-AI) (ApoA-I) (Apolipoprotein A1) [Cleaved into: Proapolipoprotein A-I (ProapoA-I); Truncated apolipoprotein A-I]
Q61474	Msi1 Msi1h		15N only	3	RNA-binding protein Musashi homolog 1 (Musashi-1)
Q9Z1G3	Atp6v1c1 Atp6c Atp6c1 Vatc		15N only	3	V-type proton ATPase subunit C 1 (V-ATPase subunit C 1) (Vacuolar proton pump subunit C 1)
Q5FW53	Mybphl		15N only	3	Myosin-binding protein H-like
P62196	Psmc5 Sug1		15N only	4	26S proteasome regulatory subunit 8 (26S proteasome AAA-ATPase subunit RPT6) (Proteasome 26S subunit ATPase 5) (Proteasome subunit p45) (p45/SUG) (mSUG1)
Q91V14	Slc12a5 Kcc2 Kiaa1176		15N only	5	Solute carrier family 12 member 5 (Electroneutral potassium-chloride cotransporter 2) (K-Cl cotransporter 2) (mKCC2) (Neuronal K-Cl cotransporter)
Q9CZC8	Scrn1 Kiaa0193		15N only	7	Secernin-1
P63011	Rab3a		15N only	6	Ras-related protein Rab-3A
Q93092	Taldo1 Tal Taldo		15N only	3	Transaldolase (EC 2.2.1.2)
Q9CQF3	Nudt21 Cpsf5		15N only	4	Cleavage and polyadenylation specificity factor subunit 5 (Nucleoside diphosphate-linked moiety X motif 21) (Nudix motif 21) (Nudix hydrolase 21)
P47955	Rplp1		15N only	6	60S acidic ribosomal protein P1
P30416	Fkbp4 Fkpb52		15N only	3	Peptidyl-prolyl cis-trans isomerase FKBP4 (PPIase FKBP4) (EC 5.2.1.8) (52 kDa FK506-binding protein) (52 kDa FKBP) (FKBP-52) (59 kDa immunophilin) (p59) (FK506-binding protein 4) (FKBP-4) (FKBP59) (HSP-binding immunophilin) (HBI) (Immunophilin FKBP52) (Rotamase) [Cleaved into: Peptidyl-prolyl cis-trans isomerase FKBP4, N-terminally processed]
Q8BH95	Echs1		15N only	3	Enoyl-CoA hydratase, mitochondrial (EC 4.2.1.17) (Enoyl-CoA hydratase 1) (Short-chain enoyl-CoA hydratase) (SCEH)
P35762	Cd81 Tapa1		15N only	6	CD81 antigen (26 kDa cell surface protein TAPA-1) (Target of the antiproliferative antibody 1) (CD antigen CD81)
Q9D7X3	Dusp3		15N only	8	Dual specificity protein phosphatase 3 (EC 3.1.3.16) (EC 3.1.3.48) (T-DSP11) (Vaccinia H1-related phosphatase) (VHR)
P63001	Rac1		15N only	4	Ras-related C3 botulinum toxin substrate 1 (p21-Rac1)
P62245	Rps15a		15N only	4	40S ribosomal protein S15a
Q62048	Pea15 Pea15a		15N only	4	Astrocytic phosphoprotein PEA-15 (15 kDa phosphoprotein enriched in astrocytes)
Q02013	Aqp1		15N only	7	Aquaporin-1 (AQP-1) (Aquaporin-CHIP) (Delayed early response protein 2) (DER2) (Water channel protein for red blood cells and kidney proximal tubule)
Q9JHI5	Ivd		15N only	3	Isovaleryl-CoA dehydrogenase, mitochondrial (IVD) (EC 1.3.8.4)
Q9CYH2	Prxl2a Fam213a Pamm		15N only	4	Peroxiredoxin-like 2A (Peroxiredoxin-like 2 activated in M-CSF stimulated monocytes) (Protein PAMM) (Redox-regulatory protein FAM213A)
Q9CZ42	Naxd Carkd		15N only	5	ATP-dependent (S)-NAD(P)H-hydrate dehydratase (EC 4.2.1.93) (ATP-dependent NAD(P)HX dehydratase) (Carbohydrate kinase domain-containing protein) (NAD(P)HX dehydratase)
P12787	Cox5a		15N only	3	Cytochrome c oxidase subunit 5A, mitochondrial (Cytochrome c oxidase polypeptide Va)
P30115	Gsta3 Gstyc		15N only	5	Glutathione S-transferase A3 (EC 2.5.1.18) (GST class-alpha member 3) (Glutathione S-transferase Ya3) (Glutathione S-transferase Yc)
Q9Z2Q6	Sept5 Pnutl1		15N only	3	Septin-5 (Cell division control-related protein 1) (CDCrel-1) (Peanut-like protein 1)
P52785	Gucy2e Guc2e		15N only	3	Guanylyl cyclase GC-E (EC 4.6.1.2) (Guanylate cyclase 2E)
P47757	Capzb Cappb1		15N only	5	F-actin-capping protein subunit beta (CapZ beta)
Q8BGY2	Eif5a2		15N only	6	Eukaryotic translation initiation factor 5A-2 (eIF-5A-2) (eIF-5A2) (Eukaryotic initiation factor 5A isoform 2)
Q1XH17	Trim72 Mg53		15N only	4	Tripartite motif-containing protein 72 (Mitsugumin-53) (Mg53)
Q61735	Cd47		15N only	8	Leukocyte surface antigen CD47 (Integrin-associated protein) (IAP) (CD antigen CD47)
Q9CY58	Serbp1 Pairbp1		15N only	3	Plasminogen activator inhibitor 1 RNA-binding protein (PAI1 RNA-binding protein 1) (PAI-RBP1) (SERPINE1 mRNA-binding protein 1)
Q501J6	Ddx17		15N only	3	Probable ATP-dependent RNA helicase DDX17 (EC 3.6.4.13) (DEAD box protein 17)
P35550	Fbl		15N only	4	rRNA 2'-O-methyltransferase fibrillarin (EC 2.1.1.-) (Histone-glutamine methyltransferase) (Nucleolar protein 1)
P84104	Srsf3 Sfrs3 Srp20 X16		15N only	4	Serine/arginine-rich splicing factor 3 (Pre-mRNA-splicing factor SRP20) (Protein X16) (Splicing factor, arginine/serine-rich 3)
Q9QYJ0	Dnaja2		15N only	3	DnaJ homolog subfamily A member 2 (mDj3)
Q8C0E2	Vps26b		15N only	4	Vacuolar protein sorting-associated protein 26B (Vesicle protein sorting 26B)
Q9WVT6	Ca14 Car14 Catm		15N only	4	Carbonic anhydrase 14 (EC 4.2.1.1) (Carbonate dehydratase XIV) (Carbonic anhydrase XIV) (CA-XIV)
Q921F4	Hnrnpll Hnrpll		15N only	5	Heterogeneous nuclear ribonucleoprotein L-like
Q925N0	Sfxn5		15N only	2	Sideroflexin-5
Q3UMR5	Mcu		15N only	3	Calcium uniporter protein, mitochondrial
Q921G7	Etfdh		15N only	2	Electron transfer flavoprotein-ubiquinone oxidoreductase, mitochondrial (ETF-QO) (ETF-ubiquinone oxidoreductase) (EC 1.5.5.1) (Electron-transferring-flavoprotein dehydrogenase) (ETF dehydrogenase)
Q61239	Fnta		15N only	6	Protein farnesyltransferase/geranylgeranyltransferase type-1 subunit alpha (EC 2.5.1.58) (EC 2.5.1.59) (CAAX farnesyltransferase subunit alpha) (FTase-alpha) (Ras proteins prenyltransferase subunit alpha) (Type I protein geranyl-geranyltransferase subunit alpha) (GGTase-I-alpha)
Q61081	Cdc37		15N only	6	Hsp90 co-chaperone Cdc37 (Hsp90 chaperone protein kinase-targeting subunit) (p50Cdc37) [Cleaved into: Hsp90 co-chaperone Cdc37, N-terminally processed]
Q9WV34	Mpp2 Dlgh2		15N only	10	MAGUK p55 subfamily member 2 (Discs large homolog 2) (Protein MPP2)
Q2TPA8	Hsdl2		15N only	3	Hydroxysteroid dehydrogenase-like protein 2 (EC 1.-.-.-)
P31324	Prkar2b		15N only	2	cAMP-dependent protein kinase type II-beta regulatory subunit
Q60972	Rbbp4 Rbap48		15N only	3	Histone-binding protein RBBP4 (Chromatin assembly factor 1 subunit C) (CAF-1 subunit C) (Chromatin assembly factor I p48 subunit) (CAF-I 48 kDa subunit) (CAF-I p48) (Nucleosome-remodeling factor subunit RBAP48) (Retinoblastoma-binding protein 4) (RBBP-4) (Retinoblastoma-binding protein p48)
Q9Z273	Tulp1		15N only	3	Tubby-related protein 1 (Tubby-like protein 1)
Q9JJW6	Alyref2 Ref2 Refbp2		15N only	5	Aly/REF export factor 2 (Alyref) (RNA and export factor-binding protein 2)
Q62418	Dbnl Abp1 Sh3p7		15N only	4	Drebrin-like protein (Actin-binding protein 1) (SH3 domain-containing protein 7)
P52825	Cpt2 Cpt-2		15N only	4	Carnitine O-palmitoyltransferase 2, mitochondrial (EC 2.3.1.21) (Carnitine palmitoyltransferase II) (CPT II)
Q924X2	Cpt1b		15N only	4	Carnitine O-palmitoyltransferase 1, muscle isoform (CPT1-M) (EC 2.3.1.21) (Carnitine O-palmitoyltransferase I, muscle isoform) (CPT I) (CPTI-M) (Carnitine palmitoyltransferase 1B)
Q62093	Srsf2 Pr264 Sfrs10 Sfrs2		15N only	3	Serine/arginine-rich splicing factor 2 (Protein PR264) (Putative myelin regulatory factor 1) (MRF-1) (Splicing component, 35 kDa) (Splicing factor SC35) (SC-35) (Splicing factor, arginine/serine-rich 2)
P60122	Ruvbl1 Tip49 Tip49a		15N only	3	RuvB-like 1 (EC 3.6.4.12) (49 kDa TATA box-binding protein-interacting protein) (49 kDa TBP-interacting protein) (DNA helicase p50) (Pontin 52) (TIP49a)
Q9WTM5	Ruvbl2		15N only	4	RuvB-like 2 (EC 3.6.4.12) (p47 protein)
Q8CJ40	Crocc Kiaa0445		15N only	4	Rootletin (Ciliary rootlet coiled-coil protein)
Q99KQ4	Nampt Pbef1		15N only	3	Nicotinamide phosphoribosyltransferase (NAmPRTase) (Nampt) (EC 2.4.2.12) (Pre-B-cell colony-enhancing factor 1 homolog) (PBEF) (Visfatin)
P53986	Slc16a1 Mct1		15N only	4	Monocarboxylate transporter 1 (MCT 1) (Solute carrier family 16 member 1)
Q00PI9	Hnrnpul2 Hnrpul2 Manp		15N only	3	Heterogeneous nuclear ribonucleoprotein U-like protein 2 (MLF1-associated nuclear protein)
O08583	Alyref Aly Ref1 Refbp1 THOC4		15N only	5	THO complex subunit 4 (Tho4) (Ally of AML-1 and LEF-1) (Aly/REF export factor) (REF1-I) (RNA and export factor-binding protein 1) (Transcriptional coactivator Aly/REF)
Q91V12	Acot7 Bach		15N only	5	Cytosolic acyl coenzyme A thioester hydrolase (EC 3.1.2.2) (Acyl-CoA thioesterase 7) (Brain acyl-CoA hydrolase) (BACH) (CTE-IIa) (CTE-II) (Long chain acyl-CoA thioester hydrolase)
Q61545	Ewsr1 Ews Ewsh		15N only	2	RNA-binding protein EWS
Q9CR68	Uqcrfs1		15N only	3	Cytochrome b-c1 complex subunit Rieske, mitochondrial (EC 1.10.2.2) (Complex III subunit 5) (Cytochrome b-c1 complex subunit 5) (Rieske iron-sulfur protein) (RISP) (Rieske protein UQCRFS1) (Ubiquinol-cytochrome c reductase iron-sulfur subunit) [Cleaved into: Cytochrome b-c1 complex subunit 9 (Su9) (Subunit 9) (8 kDa subunit 9) (Complex III subunit IX) (Cytochrome b-c1 complex subunit 11) (Ubiquin…
Q9ER00	Stx12		15N only	3	Syntaxin-12
Q99LD8	Ddah2		15N only	4	N(G),N(G)-dimethylarginine dimethylaminohydrolase 2 (DDAH-2) (Dimethylarginine dimethylaminohydrolase 2) (EC 3.5.3.18) (DDAHII) (Dimethylargininase-2)
Q99020	Hnrnpab Cbf-a Cgbfa Hnrpab		15N only	3	Heterogeneous nuclear ribonucleoprotein A/B (hnRNP A/B) (CArG-binding factor-A) (CBF-A)
Q9EQU5	Set		15N only	2	Protein SET (Phosphatase 2A inhibitor I2PP2A) (I-2PP2A) (Template-activating factor I) (TAF-I)
Q9WUA2	Farsb Farsl Farslb Frsb		15N only	3	Phenylalanine--tRNA ligase beta subunit (EC 6.1.1.20) (Phenylalanyl-tRNA synthetase beta subunit) (PheRS)
Q60749	Khdrbs1		15N only	4	KH domain-containing, RNA-binding, signal transduction-associated protein 1 (GAP-associated tyrosine phosphoprotein p62) (Src-associated in mitosis 68 kDa protein) (Sam68) (p21 Ras GTPase-activating protein-associated p62) (p68)
Q3TDN2	Faf2 Kiaa0887 Ubxd8		15N only	7	FAS-associated factor 2 (UBX domain-containing protein 8)
Q91V64	Isoc1		15N only	3	Isochorismatase domain-containing protein 1
P62264	Rps14		15N only	4	40S ribosomal protein S14
Q9Z1X4	Ilf3		15N only	3	Interleukin enhancer-binding factor 3
Q922B1	Macrod1 Lrp16		15N only	3	ADP-ribose glycohydrolase MACROD1 (MACRO domain-containing protein 1) (O-acetyl-ADP-ribose deacetylase MACROD1) (EC 3.5.1.-) (Protein LRP16) ([Protein ADP-ribosylaspartate] hydrolase MACROD1) (EC 3.2.2.-) ([Protein ADP-ribosylglutamate] hydrolase MACROD1) (EC 3.2.2.-)
O35459	Ech1		15N only	4	Delta(3,5)-Delta(2,4)-dienoyl-CoA isomerase, mitochondrial (EC 5.3.3.-)
Q3UQ28	Pxdn Kiaa0230		15N only	3	Peroxidasin homolog (EC 1.11.1.7)
Q9DAW9	Cnn3		15N only	3	Calponin-3 (Calponin, acidic isoform)
D3Z7P3	Gls Gls1 Kiaa0838		15N only	3	Glutaminase kidney isoform, mitochondrial (GLS) (EC 3.5.1.2)
Q8CIB5	Fermt2 Plekhc1		15N only	3	Fermitin family homolog 2 (Kindlin-2) (Pleckstrin homology domain-containing family C member 1)
Q9Z1Z2	Strap Unrip		15N only	3	Serine-threonine kinase receptor-associated protein (UNR-interacting protein)
P62881	Gnb5		15N only	3	Guanine nucleotide-binding protein subunit beta-5 (Gbeta5) (Transducin beta chain 5)
Q3TEA8	Hp1bp3		15N only	3	Heterochromatin protein 1-binding protein 3
P24288	Bcat1 Eca39		15N only	3	Branched-chain-amino-acid aminotransferase, cytosolic (BCAT(c)) (EC 2.6.1.42) (Protein ECA39)
Q8K4Z5	Sf3a1		15N only	2	Splicing factor 3A subunit 1 (SF3a120)
Q9QZB7	Actr10 Act11 Actr11 Arp11		15N only	4	Actin-related protein 10 (Actin-related protein 11)
P61021	Rab5b		15N only	4	Ras-related protein Rab-5B
Q9DBG5	Plin3 M6prbp1 Tip47		15N only	3	Perilipin-3 (Cargo selection protein TIP47) (Mannose-6-phosphate receptor-binding protein 1)
Q7M6Y3	Picalm Calm Fit1		15N only	4	Phosphatidylinositol-binding clathrin assembly protein (Clathrin assembly lymphoid myeloid leukemia) (CALM)
O35857	Timm44 Mimt44 Tim44		15N only	3	Mitochondrial import inner membrane translocase subunit TIM44
P15116	Cdh2		15N only	4	Cadherin-2 (Neural cadherin) (N-cadherin) (CD antigen CD325)
P97855	G3bp1 G3bp		15N only	5	Ras GTPase-activating protein-binding protein 1 (G3BP-1) (EC 3.6.4.12) (EC 3.6.4.13) (ATP-dependent DNA helicase VIII) (GAP SH3 domain-binding protein 1) (HDH-VIII)
O70622	Rtn2 Nspl1		15N only	2	Reticulon-2 (Neuroendocrine-specific protein-like 1) (NSP-like protein 1) (Neuroendocrine-specific protein-like I) (NSP-like protein I) (NSPLI)
Q9QUR6	Prep Pep		15N only	4	Prolyl endopeptidase (PE) (EC 3.4.21.26) (Post-proline cleaving enzyme)
P54822	Adsl Adl		15N only	2	Adenylosuccinate lyase (ASL) (EC 4.3.2.2) (Adenylosuccinase) (ASase)
Q9WUM3	Coro1b		15N only	4	Coronin-1B (Coronin-2)
Q9CW03	Smc3 Bam Bmh Cspg6 Mmip1 Smc3l1 Smcd		15N only	2	Structural maintenance of chromosomes protein 3 (SMC protein 3) (SMC-3) (Basement membrane-associated chondroitin proteoglycan) (Bamacan) (Chondroitin sulfate proteoglycan 6) (Chromosome segregation protein SmcD) (Mad member-interacting protein 1)
P51660	Hsd17b4 Edh17b4		15N only	3	Peroxisomal multifunctional enzyme type 2 (MFE-2) (17-beta-hydroxysteroid dehydrogenase 4) (17-beta-HSD 4) (D-bifunctional protein) (DBP) (Multifunctional protein 2) (MPF-2) [Cleaved into: (3R)-hydroxyacyl-CoA dehydrogenase (EC 1.1.1.n12); Enoyl-CoA hydratase 2 (EC 4.2.1.107) (EC 4.2.1.119) (3-alpha,7-alpha,12-alpha-trihydroxy-5-beta-cholest-24-enoyl-CoA hydratase)]
Q922V4	Plrg1		15N only	4	Pleiotropic regulator 1
Q9Z1W8	Atp12a Atp1al1		15N only	3	Potassium-transporting ATPase alpha chain 2 (EC 3.6.3.10) (Non-gastric H(+)/K(+) ATPase subunit alpha) (Proton pump)
P07147	Tyrp1 Tyrp-1		15N only	4	5,6-dihydroxyindole-2-carboxylic acid oxidase (DHICA oxidase) (EC 1.14.18.-) (Brown locus protein) (Catalase B) (Tyrosinase-related protein 1) (TRP) (TRP-1) (TRP1)
Q8BYI9	Tnr		15N only	3	Tenascin-R (TN-R) (Janusin) (Neural recognition molecule J1-160/180) (Restrictin)
Q921T2	Tor1aip1		15N only	4	Torsin-1A-interacting protein 1 (Lamina-associated polypeptide 1B) (LAP1B)
Q9QZE7	Tsnax Trax		15N only	3	Translin-associated protein X (Translin-associated factor X)
Q99J99	Mpst		15N only	4	3-mercaptopyruvate sulfurtransferase (MST) (EC 2.8.1.2)
Q99MN1	Kars		15N only	4	Lysine--tRNA ligase (EC 2.7.7.-) (EC 6.1.1.6) (Lysyl-tRNA synthetase) (LysRS)
P39061	Col18a1		15N only	6	Collagen alpha-1(XVIII) chain [Cleaved into: Endostatin; Non-collagenous domain 1 (NC1)]
P37040	Por		15N only	4	NADPH--cytochrome P450 reductase (CPR) (P450R) (EC 1.6.2.4)
Q9D880	Timm50 Tim50		15N only	3	Mitochondrial import inner membrane translocase subunit TIM50
P55264	Adk		15N only	3	Adenosine kinase (AK) (EC 2.7.1.20) (Adenosine 5'-phosphotransferase)
Q9D0R2	Tars		15N only	3	Threonine--tRNA ligase, cytoplasmic (EC 6.1.1.3) (Threonyl-tRNA synthetase) (ThrRS)
Q4VA53	Pds5b Aprin As3 Kiaa0979		15N only	3	Sister chromatid cohesion protein PDS5 homolog B (Androgen-induced proliferation inhibitor) (Androgen-induced prostate proliferative shutoff-associated protein AS3)
Q3TVI8	Pbxip1 Hpip		15N only	6	Pre-B-cell leukemia transcription factor-interacting protein 1 (Hematopoietic PBX-interacting protein)
Q9R0Q6	Arpc1a Sid329		15N only	6	Actin-related protein 2/3 complex subunit 1A (SOP2-like protein) (Sid 329)
Q6PDQ2	Chd4		15N only	2	Chromodomain-helicase-DNA-binding protein 4 (CHD-4) (EC 3.6.4.12)
Q8BML9	Qars		15N only	5	Glutamine--tRNA ligase (EC 6.1.1.18) (Glutaminyl-tRNA synthetase) (GlnRS)
O35465	Fkbp8 Fkbp38 Sam11		15N only	4	Peptidyl-prolyl cis-trans isomerase FKBP8 (PPIase FKBP8) (EC 5.2.1.8) (38 kDa FK506-binding protein) (38 kDa FKBP) (FKBP-38) (mFKBP38) (FK506-binding protein 8) (FKBP-8) (FKBPR38) (Rotamase)
Q9D7N9	Apmap		15N only	3	Adipocyte plasma membrane-associated protein (Protein DD16)
O54990	Prom1 Prom Proml1		15N only	2	Prominin-1 (Antigen AC133 homolog) (Prominin-like protein 1) (CD antigen CD133)
Q8VDJ3	Hdlbp		15N only	3	Vigilin (High density lipoprotein-binding protein) (HDL-binding protein)
P39054	Dnm2 Dyn2		15N only	2	Dynamin-2 (EC 3.6.5.5) (Dynamin UDNM)
Q8VCM7	Fgg		15N only	7	Fibrinogen gamma chain
Q61029	Tmpo Lap2		15N only	4	Lamina-associated polypeptide 2, isoforms beta/delta/epsilon/gamma (Thymopoietin isoforms beta/delta/epsilon/gamma) (TP beta/delta/epsilon/gamma)
Q9QYR9	Acot2 Mte1		15N only	3	Acyl-coenzyme A thioesterase 2, mitochondrial (Acyl-CoA thioesterase 2) (EC 3.1.2.2) (Acyl coenzyme A thioester hydrolase) (MTE-I) (Very-long-chain acyl-CoA thioesterase)
O08663	Metap2 Mnpep P67eif2		15N only	3	Methionine aminopeptidase 2 (MAP 2) (MetAP 2) (EC 3.4.11.18) (Initiation factor 2-associated 67 kDa glycoprotein) (p67) (p67eIF2) (Peptidase M)
P00397	Mtco1 COI mt-Co1		15N only	4	Cytochrome c oxidase subunit 1 (EC 1.9.3.1) (Cytochrome c oxidase polypeptide I)
Q8C166	Cpne1		15N only	4	Copine-1 (Copine I)
Q6PDG5	Smarcc2 Baf170		15N only	3	SWI/SNF complex subunit SMARCC2 (BRG1-associated factor 170) (BAF170) (SWI/SNF complex 170 kDa subunit) (SWI/SNF-related matrix-associated actin-dependent regulator of chromatin subfamily C member 2)
Q6PDI5	Ecpas Ecm29 Kiaa0368		15N only	3	Proteasome adapter and scaffold protein ECM29 (Proteasome-associated protein ECM29 homolog)
Q5SQX6	Cyfip2 Kiaa1168 Pir121		15N only	3	Cytoplasmic FMR1-interacting protein 2 (p53-inducible protein 121)
Q8R050	Gspt1 Erf3a		15N only	3	Eukaryotic peptide chain release factor GTP-binding subunit ERF3A (Eukaryotic peptide chain release factor subunit 3a) (eRF3a) (G1 to S phase transition protein 1 homolog)
Q5SSZ5	Tns3 Tens1		15N only	6	Tensin-3 (Tensin-like SH2 domain-containing protein 1)
P97742	Cpt1a Cpt-1 Cpt1		15N only	4	Carnitine O-palmitoyltransferase 1, liver isoform (CPT1-L) (EC 2.3.1.21) (Carnitine O-palmitoyltransferase I, liver isoform) (CPT I) (CPTI-L) (Carnitine palmitoyltransferase 1A)
Q61699	Hsph1 Hsp105 Hsp110 Kiaa0201		15N only	2	Heat shock protein 105 kDa (42 degrees C-HSP) (Heat shock 110 kDa protein) (Heat shock-related 100 kDa protein E7I) (HSP-E7I)
Q9EQH2	Erap1 Appils Arts1		15N only	3	Endoplasmic reticulum aminopeptidase 1 (EC 3.4.11.-) (ARTS-1) (Adipocyte-derived leucine aminopeptidase) (A-LAP) (Aminopeptidase PILS) (Puromycin-insensitive leucyl-specific aminopeptidase) (PILS-AP) (VEGF-induced aminopeptidase)
Q7TPV4	Mybbp1a P160		15N only	4	Myb-binding protein 1A (Myb-binding protein of 160 kDa)
Q9QZQ1	Afdn Af6 Mllt4		15N only	3	Afadin (Afadin adherens junction formation factor) (Protein Af-6)
Q6ZQM8	Ugt1a7c Ugt1a10		15N only	2	UDP-glucuronosyltransferase 1-7C (UDPGT 1-7C) (UGT1*7C) (UGT1-07C) (UGT1.7C) (EC 2.4.1.17) (UDP-glucuronosyltransferase 1A7C) (UGT1A10)
Q9CPU4	Mgst3		15N only	3	Microsomal glutathione S-transferase 3 (Microsomal GST-3) (EC 2.5.1.18) (Microsomal GST-III)
Q9Z1Q5	Clic1		15N only	6	Chloride intracellular channel protein 1 (Nuclear chloride ion channel 27) (NCC27)
P55096	Abcd3 Pmp70 Pxmp1		15N only	5	ATP-binding cassette sub-family D member 3 (68 kDa peroxisomal membrane protein) (PMP68) (70 kDa peroxisomal membrane protein) (PMP70)
P84096	Rhog Arhg Sid10750		15N only	6	Rho-related GTP-binding protein RhoG (Sid 10750)
Q5SYD0	Myo1d		15N only	5	Unconventional myosin-Id
Q8CHT0	Aldh4a1		15N only	8	Delta-1-pyrroline-5-carboxylate dehydrogenase, mitochondrial (P5C dehydrogenase) (EC 1.2.1.88) (Aldehyde dehydrogenase family 4 member A1) (L-glutamate gamma-semialdehyde dehydrogenase)
Q922Q1	Marc2 Mg87 Mosc2		15N only	3	Mitochondrial amidoxime reducing component 2 (mARC2) (EC 1.-.-.-) (Molybdenum cofactor sulfurase C-terminal domain-containing protein 2) (MOSC domain-containing protein 2) (Moco sulfurase C-terminal domain-containing protein 2)
Q9DC50	Crot Cot		15N only	4	Peroxisomal carnitine O-octanoyltransferase (COT) (EC 2.3.1.137)
E9PV24	Fga		15N only	6	Fibrinogen alpha chain [Cleaved into: Fibrinopeptide A; Fibrinogen alpha chain]
Q62452	Ugt1a9 Ugt1 Ugt1a12		15N only	2	UDP-glucuronosyltransferase 1-9 (UDPGT 1-9) (UGT1*9) (UGT1-09) (UGT1.9) (EC 2.4.1.17) (UDP-glucuronosyltransferase 1-7) (UDPGT) (UDP-glucuronosyltransferase 1A9) (UGT1A12) (UGTP4)
P30677	Gna14 Gna-14		15N only	3	Guanine nucleotide-binding protein subunit alpha-14 (G alpha-14) (G-protein subunit alpha-14)
P70691	Ugt1a2 Ugt1		15N only	2	UDP-glucuronosyltransferase 1-2 (UDPGT 1-2) (UGT1*2) (UGT1-02) (UGT1.2) (EC 2.4.1.17) (Bilirubin-specific UDPGT) (UDP-glucuronosyltransferase 1A2) (UGT1A2)
Q63886	Ugt1a1 Ugt1		15N only	2	UDP-glucuronosyltransferase 1-1 (UDPGT 1-1) (UGT1*1) (UGT1-01) (UGT1.1) (EC 2.4.1.17) (UDP-glucuronosyltransferase 1A1) (UGTBR1)
P21278	Gna11 Gna-11		15N only	3	Guanine nucleotide-binding protein subunit alpha-11 (G alpha-11) (G-protein subunit alpha-11)
Q8R5J9	Arl6ip5 Aip5 Jwa Pra2 Praf3		15N only	2	PRA1 family protein 3 (ADP-ribosylation factor-like protein 6-interacting protein 5) (ARL-6-interacting protein 5) (Aip-5) (Addicsin) (GTRAP3-18) (Glutamate transporter EAAC1-interacting protein) (Prenylated Rab acceptor protein 2) (Protein JWa)
Q61033	Tmpo Lap2		15N only	5	Lamina-associated polypeptide 2, isoforms alpha/zeta (Thymopoietin isoforms alpha/zeta) (TP alpha/zeta)
Q80UM7	Mogs Gcs1		15N only	2	Mannosyl-oligosaccharide glucosidase (EC 3.2.1.106) (Glucosidase 1) (Glycoprotein-processing glucosidase I)
P31428	Dpep1 Mbd1 Rdp		15N only	3	Dipeptidase 1 (EC 3.4.13.19) (Membrane-bound dipeptidase 1) (MBD-1) (Microsomal dipeptidase) (Renal dipeptidase)
Q62165	Dag1 Dag-1		15N only	4	Dystroglycan (Dystrophin-associated glycoprotein 1) [Cleaved into: Alpha-dystroglycan (Alpha-DG); Beta-dystroglycan (Beta-DG)]
Q61235	Sntb2 Snt2b2		15N only	4	Beta-2-syntrophin (59 kDa dystrophin-associated protein A1 basic component 2) (Syntrophin-3) (SNT3) (Syntrophin-like) (SNTL)
P60766	Cdc42		15N only	8	Cell division control protein 42 homolog (G25K GTP-binding protein)
Q922D8	Mthfd1		15N only	2	C-1-tetrahydrofolate synthase, cytoplasmic (C1-THF synthase) [Cleaved into: C-1-tetrahydrofolate synthase, cytoplasmic, N-terminally processed] [Includes: Methylenetetrahydrofolate dehydrogenase (EC 1.5.1.5); Methenyltetrahydrofolate cyclohydrolase (EC 3.5.4.9); Formyltetrahydrofolate synthetase (EC 6.3.4.3)]
Q9ESB3	Hrg		15N only	6	Histidine-rich glycoprotein (Histidine-proline-rich glycoprotein) (HPRG)
Q8R2N1	Aqp3		15N only	3	Aquaporin-3 (AQP-3) (Aquaglyceroporin-3)
P09803	Cdh1		15N only	4	Cadherin-1 (ARC-1) (Epithelial cadherin) (E-cadherin) (Uvomorulin) (CD antigen CD324) [Cleaved into: E-Cad/CTF1; E-Cad/CTF2; E-Cad/CTF3]
Q6NZJ6	Eif4g1		15N only	3	Eukaryotic translation initiation factor 4 gamma 1 (eIF-4-gamma 1) (eIF-4G 1) (eIF-4G1)
Q8BJS4	Sun2 Unc84b		15N only	2	SUN domain-containing protein 2 (Protein unc-84 homolog B) (Sad1/unc-84 protein-like 2)
Q9CZR2	Naalad2		15N only	4	N-acetylated-alpha-linked acidic dipeptidase 2 (EC 3.4.17.21) (Glutamate carboxypeptidase III) (GCPIII) (N-acetylaspartylglutamate peptidase II) (NAAG-peptidase II) (N-acetylated-alpha-linked acidic dipeptidase II) (NAALADase II)
Q6P1B1	Xpnpep1		15N only	3	Xaa-Pro aminopeptidase 1 (EC 3.4.11.9) (Aminoacylproline aminopeptidase) (Cytosolic aminopeptidase P) (Soluble aminopeptidase P) (sAmp) (X-Pro aminopeptidase 1) (X-prolyl aminopeptidase 1, soluble)
Q9EPX2	Papln		15N only	2	Papilin
Q9WVA4	Tagln2 Kiaa0120		15N only	3	Transgelin-2 (SM22-beta)
Q99K30	Eps8l2 Eps8r2		15N only	3	Epidermal growth factor receptor kinase substrate 8-like protein 2 (EPS8-like protein 2) (Epidermal growth factor receptor pathway substrate 8-related protein 2) (EPS8-related protein 2)
Q6IRU2	Tpm4		15N only	4	Tropomyosin alpha-4 chain (Tropomyosin-4)
Q91W43	Gldc		15N only	4	Glycine dehydrogenase (decarboxylating), mitochondrial (EC 1.4.4.2) (Glycine cleavage system P protein) (Glycine decarboxylase) (Glycine dehydrogenase (aminomethyl-transferring))
P47856	Gfpt1 Gfpt		15N only	2	Glutamine--fructose-6-phosphate aminotransferase [isomerizing] 1 (EC 2.6.1.16) (D-fructose-6-phosphate amidotransferase 1) (Glutamine:fructose-6-phosphate amidotransferase 1) (GFAT 1) (GFAT1) (Hexosephosphate aminotransferase 1)
Q64010	Crk Crko		15N only	2	Adapter molecule crk (Proto-oncogene c-Crk) (p38)
P97384	Anxa11 Anx11		15N only	4	Annexin A11 (Annexin XI) (Annexin-11) (Calcyclin-associated annexin 50) (CAP-50)
P56565	S100a1		15N only	4	Protein S100-A1 (S-100 protein alpha chain) (S-100 protein subunit alpha) (S100 calcium-binding protein A1)
Q9CPW4	Arpc5		15N only	2	Actin-related protein 2/3 complex subunit 5 (Arp2/3 complex 16 kDa subunit) (p16-ARC)
O88952	Lin7c Mals3 Veli3		15N only	4	Protein lin-7 homolog C (Lin-7C) (mLin7C) (Mammalian lin-seven protein 3) (MALS-3) (Vertebrate lin-7 homolog 3) (Veli-3)
B2RXS4	Plxnb2		15N only	3	Plexin-B2
O35887	Calu		15N only	4	Calumenin (Crocalbin)
Q6DYE8	Enpp3		15N only	3	Ectonucleotide pyrophosphatase/phosphodiesterase family member 3 (E-NPP 3) (Phosphodiesterase I beta) (PD-Ibeta) (Phosphodiesterase I/nucleotide pyrophosphatase 3) (CD antigen CD203c) [Includes: Alkaline phosphodiesterase I (EC 3.1.4.1); Nucleotide pyrophosphatase (NPPase) (EC 3.6.1.9) (Nucleotide diphosphatase)]
Q9DAR7	Dcps Dcs1 Hint5		15N only	2	m7GpppX diphosphatase (EC 3.6.1.59) (DCS-1) (Decapping scavenger enzyme) (Hint-related 7meGMP-directed hydrolase) (Histidine triad nucleotide-binding protein 5) (Histidine triad protein member 5) (HINT-5) (Scavenger mRNA-decapping enzyme DcpS)
Q8JZS0	Lin7a Mals1 Veli1		15N only	4	Protein lin-7 homolog A (Lin-7A) (mLin-7) (Mammalian lin-seven protein 1) (MALS-1) (Vertebrate lin-7 homolog 1) (Veli-1)
Q8BG51	Rhot1 Arht1		15N only	4	Mitochondrial Rho GTPase 1 (MIRO-1) (EC 3.6.5.-) (Ras homolog gene family member T1)
Q6ZWQ0	Syne2		15N only	3	Nesprin-2 (KASH domain-containing protein 2) (KASH2) (Nuclear envelope spectrin repeat protein 2) (Nucleus and actin connecting element protein) (Protein NUANCE) (Synaptic nuclear envelope protein 2) (Syne-2)
P28660	Nckap1 Hem2 Kiaa0587 Nap1		15N only	3	Nck-associated protein 1 (NAP 1) (Brain protein H19) (MH19) (Membrane-associated protein HEM-2) (p125Nap1)
Q8C7R4	Uba6 Ube1l2		15N only	2	Ubiquitin-like modifier-activating enzyme 6 (Ubiquitin-activating enzyme 6) (EC 6.2.1.45) (Ubiquitin-activating enzyme E1-like protein 2) (E1-L2)
Q8BT60	Cpne3 Kiaa0636		15N only	2	Copine-3 (Copine III)
Q61160	Fadd Mort1		15N only	2	FAS-associated death domain protein (FAS-associating death domain-containing protein) (Mediator of receptor induced toxicity) (Protein FADD)
P54823	Ddx6 Hlr2 Rck		15N only	3	Probable ATP-dependent RNA helicase DDX6 (EC 3.6.4.13) (ATP-dependent RNA helicase p54) (DEAD box protein 6) (Oncogene RCK homolog)
Q62417	Sorbs1 Kiaa1296 Sh3d5		15N only	2	Sorbin and SH3 domain-containing protein 1 (Ponsin) (SH3 domain protein 5) (SH3P12) (c-Cbl-associated protein) (CAP)
Q99JB8	Pacsin3		15N only	8	Protein kinase C and casein kinase II substrate protein 3
Q3UGR5	Hdhd2		15N only	6	Haloacid dehalogenase-like hydrolase domain-containing protein 2
P37804	Tagln Sm22 Sm22a		15N only	3	Transgelin (Actin-associated protein p27) (Smooth muscle protein 22-alpha) (SM22-alpha)
Q6WVG3	Kctd12 Pfet1		15N only	3	BTB/POZ domain-containing protein KCTD12 (Pfetin) (Predominantly fetal expressed T1 domain)
Q3UTJ2	Sorbs2 Argbp2 Kiaa0777		15N only	2	Sorbin and SH3 domain-containing protein 2 (Arg-binding protein 2) (ArgBP2) (Arg/Abl-interacting protein 2)
Q8BH97	Rcn3 D7Ertd671e		15N only	3	Reticulocalbin-3
E9Q3L2	Pi4ka Pik4 Pik4ca		15N only	5	Phosphatidylinositol 4-kinase alpha (PI4-kinase alpha) (PI4K-alpha) (PtdIns-4-kinase alpha) (EC 2.7.1.67)
Q8R3B1	Plcd1 Plcd		15N only	2	1-phosphatidylinositol 4,5-bisphosphate phosphodiesterase delta-1 (EC 3.1.4.11) (Phosphoinositide phospholipase C-delta-1) (Phospholipase C-delta-1) (PLC-delta-1)
Q9CRA5	Golph3 Gpp34		15N only	3	Golgi phosphoprotein 3 (Coat protein GPP34)
Q64449	Mrc2 Kiaa0709		15N only	4	C-type mannose receptor 2 (Lectin lambda) (Macrophage mannose receptor 2) (CD antigen CD280)
Q8BX02	Kank2 Ankrd25		15N only	3	KN motif and ankyrin repeat domain-containing protein 2 (Ankyrin repeat domain-containing protein 25)
Q9JHU9	Isyna1 Ino1		15N only	2	Inositol-3-phosphate synthase 1 (IPS 1) (EC 5.5.1.4) (Myo-inositol 1-phosphate synthase) (MI-1-P synthase) (MIP synthase)
Q07797	Lgals3bp Cycap Mama		15N only	6	Galectin-3-binding protein (Cyp-C-associated protein) (CyCAP) (Lectin galactoside-binding soluble 3-binding protein) (Protein MAMA)
Q62189	Snrpa Rnu1a-1		15N only	4	U1 small nuclear ribonucleoprotein A (U1 snRNP A) (U1-A) (U1A)
Q9CU62	Smc1a Sb1.8 Smc1 Smc1l1 Smcb		15N only	4	Structural maintenance of chromosomes protein 1A (SMC protein 1A) (SMC-1-alpha) (SMC-1A) (Chromosome segregation protein SmcB) (Sb1.8)
Q61823	Pdcd4 Ma3 Tis		15N only	3	Programmed cell death protein 4 (Protein MA-3) (Topoisomerase-inhibitor suppressed protein)
Q8BWQ6			15N only	4	UPF0505 protein C16orf62 homolog
P29416	Hexa		15N only	4	Beta-hexosaminidase subunit alpha (EC 3.2.1.52) (Beta-N-acetylhexosaminidase subunit alpha) (Hexosaminidase subunit A) (N-acetyl-beta-glucosaminidase subunit alpha)
Q91VS7	Mgst1		15N only	3	Microsomal glutathione S-transferase 1 (Microsomal GST-1) (EC 2.5.1.18) (Microsomal GST-I)
P54869	Hmgcs2		15N only	2	Hydroxymethylglutaryl-CoA synthase, mitochondrial (HMG-CoA synthase) (EC 2.3.3.10) (3-hydroxy-3-methylglutaryl coenzyme A synthase)
Q6PHU5	Sort1		15N only	2	Sortilin (Neurotensin receptor 3) (NTR3) (mNTR3)
P50114	S100b		15N only	3	Protein S100-B (S-100 protein beta chain) (S-100 protein subunit beta) (S100 calcium-binding protein B)
O70400	Pdlim1 Clim1		15N only	3	PDZ and LIM domain protein 1 (C-terminal LIM domain protein 1) (Elfin) (LIM domain protein CLP-36)
P16330	Cnp Cnp1		15N only	3	2',3'-cyclic-nucleotide 3'-phosphodiesterase (CNP) (CNPase) (EC 3.1.4.37)
Q91ZQ5	Rpe65		15N only	3	Retinoid isomerohydrolase (EC 3.1.1.64) (All-trans-retinyl-palmitate hydrolase) (Meso-zeaxanthin isomerase) (EC 5.3.3.-) (Retinal pigment epithelium-specific 65 kDa protein) (Retinol isomerase)
P29812	Dct Tyrp-2 Tyrp2		15N only	3	L-dopachrome tautomerase (DCT) (DT) (EC 5.3.3.12) (DOPAchrome conversion factor) (DOPAchrome isomerase) (DOPAchrome oxidoreductase) (L-dopachrome Delta-isomerase) (SLATY locus protein) (Tyrosinase-related protein 2) (TRP-2) (TRP2)
O88668	Creg1 Creg		15N only	2	Protein CREG1 (Cellular repressor of E1A-stimulated genes 1)
P55850	Dsc3		15N only	5	Desmocollin-3
Q99L88	Sntb1 Snt2b1		15N only	5	Beta-1-syntrophin (59 kDa dystrophin-associated protein A1 basic component 1) (DAPA1B) (Syntrophin-2)
Q9DD23	Lypd2 Lypdc2		15N only	3	Ly6/PLAUR domain-containing protein 2 (Protein H8C4)
Q61490	Alcam		15N only	3	CD166 antigen (Activated leukocyte cell adhesion molecule) (BEN) (Protein DM-GRASP) (CD antigen CD166)
Q148V8	Fam83h		15N only	2	Protein FAM83H
Q9D701	Upk3bl1 Upk3bl		15N only	6	Uroplakin-3b-like protein 1
Q8VDM6	Hnrnpul1 Hnrpul1		15N only	4	Heterogeneous nuclear ribonucleoprotein U-like protein 1
Q8VCC9	Spon1		15N only	3	Spondin-1 (F-spondin)
Q9WUL7	Arl3		15N only	2	ADP-ribosylation factor-like protein 3
Q9DCJ9	Npl		15N only	1	N-acetylneuraminate lyase (NALase) (EC 4.1.3.3) (N-acetylneuraminate pyruvate-lyase) (N-acetylneuraminic acid aldolase) (Sialate lyase) (Sialate-pyruvate lyase) (Sialic acid aldolase) (Sialic acid lyase)
Q9CQI6	Cotl1 Clp		15N only	1	Coactosin-like protein
Q9R1P0	Psma4		15N only	3	Proteasome subunit alpha type-4 (EC 3.4.25.1) (Macropain subunit C9) (Multicatalytic endopeptidase complex subunit C9) (Proteasome component C9) (Proteasome subunit L)
P13707	Gpd1 Gdc-1 Gdc1 Kiaa4010		15N only	2	Glycerol-3-phosphate dehydrogenase [NAD(+)], cytoplasmic (GPD-C) (GPDH-C) (EC 1.1.1.8)
P15532	Nme1 Nm23		15N only	1	Nucleoside diphosphate kinase A (NDK A) (NDP kinase A) (EC 2.7.4.6) (Metastasis inhibition factor NM23) (NDPK-A) (Tumor metastatic process-associated protein) (nm23-M1)
P09041	Pgk2 Pgk-2		15N only	4	Phosphoglycerate kinase 2 (EC 2.7.2.3) (Phosphoglycerate kinase, testis specific)
Q9Z0S1	Bpnt1		15N only	2	3'(2'),5'-bisphosphate nucleotidase 1 (EC 3.1.3.7) (Bisphosphate 3'-nucleotidase 1) (PAP-inositol 1,4-phosphatase) (PIP)
O88685	Psmc3 Tbp1		15N only	3	26S proteasome regulatory subunit 6A (26S proteasome AAA-ATPase subunit RPT5) (Proteasome 26S subunit ATPase 3) (Tat-binding protein 1) (TBP-1)
P28656	Nap1l1 Nrp		15N only	1	Nucleosome assembly protein 1-like 1 (Brain protein DN38) (NAP-1-related protein)
P48774	Gstm5 Fsc2 Gstm3		15N only	2	Glutathione S-transferase Mu 5 (EC 2.5.1.18) (Fibrous sheath component 2) (Fsc2) (GST class-mu 5)
Q9CPU0	Glo1		15N only	2	Lactoylglutathione lyase (EC 4.4.1.5) (Aldoketomutase) (Glyoxalase I) (Glx I) (Ketone-aldehyde mutase) (Methylglyoxalase) (S-D-lactoylglutathione methylglyoxal lyase)
P60229	Eif3e Eif3s6 Int6		15N only	1	Eukaryotic translation initiation factor 3 subunit E (eIF3e) (Eukaryotic translation initiation factor 3 subunit 6) (MMTV integration site 6) (Mammary tumor-associated protein INT-6) (Viral integration site protein INT-6) (eIF-3 p48)
Q9CZ04	Cops7a Csn7a		15N only	2	COP9 signalosome complex subunit 7a (SGN7a) (Signalosome subunit 7a) (JAB1-containing signalosome subunit 7a)
P05132	Prkaca Pkaca		15N only	3	cAMP-dependent protein kinase catalytic subunit alpha (PKA C-alpha) (EC 2.7.11.11)
Q8BZF8	Pgm5		15N only	4	Phosphoglucomutase-like protein 5
O70435	Psma3		15N only	1	Proteasome subunit alpha type-3 (EC 3.4.25.1) (Macropain subunit C8) (Multicatalytic endopeptidase complex subunit C8) (Proteasome component C8) (Proteasome subunit K)
Q8VCA8	Scrn2		15N only	1	Secernin-2
Q99JX4	Eif3m Pcid1		15N only	2	Eukaryotic translation initiation factor 3 subunit M (eIF3m) (PCI domain-containing protein 1)
P68181	Prkacb Pkacb		15N only	2	cAMP-dependent protein kinase catalytic subunit beta (PKA C-beta) (EC 2.7.11.11)
Q80X95	Rraga		15N only	2	Ras-related GTP-binding protein A (Rag A) (RagA)
Q8CGA0	Ppm1f		15N only	1	Protein phosphatase 1F (EC 3.1.3.16) (Ca(2+)/calmodulin-dependent protein kinase phosphatase) (CaM-kinase phosphatase) (CaMKPase)
P14685	Psmd3 P91a Tstap91a		15N only	2	26S proteasome non-ATPase regulatory subunit 3 (26S proteasome regulatory subunit RPN3) (26S proteasome regulatory subunit S3) (Proteasome subunit p58) (Transplantation antigen P91A) (Tum-P91A antigen)
Q8BYA0	Tbcd		15N only	1	Tubulin-specific chaperone D (Beta-tubulin cofactor D) (Tubulin-folding cofactor D)
Q91W89	Man2c1		15N only	2	Alpha-mannosidase 2C1 (EC 3.2.1.24) (Alpha-D-mannoside mannohydrolase) (Mannosidase alpha class 2C member 1) (Neutral/cytosolic alpha-mannosidase)
Q05D44	Eif5b If2		15N only	2	Eukaryotic translation initiation factor 5B (eIF-5B) (EC 3.6.5.3) (Translation initiation factor IF-2)
P62858	Rps28		15N only	4	40S ribosomal protein S28
P62301	Rps13		15N only	1	40S ribosomal protein S13
Q9R1P3	Psmb2		15N only	1	Proteasome subunit beta type-2 (EC 3.4.25.1) (Macropain subunit C7-I) (Multicatalytic endopeptidase complex subunit C7-I) (Proteasome component C7-I)
Q9CR57	Rpl14		15N only	2	60S ribosomal protein L14
P62774	Mtpn Gcdp		15N only	2	Myotrophin (Granule cell differentiation protein) (Protein V-1)
P62900	Rpl31		15N only	2	60S ribosomal protein L31
Q8BK64	Ahsa1		15N only	1	Activator of 90 kDa heat shock protein ATPase homolog 1 (AHA1)
Q9JIW9	Ralb		15N only	3	Ras-related protein Ral-B
P63321	Rala Ral Ral-a		15N only	3	Ras-related protein Ral-A
Q6ZWX6	Eif2s1 Eif2a		15N only	2	Eukaryotic translation initiation factor 2 subunit 1 (Eukaryotic translation initiation factor 2 subunit alpha) (eIF-2-alpha) (eIF-2A) (eIF-2alpha)
Q9CXW4	Rpl11		15N only	2	60S ribosomal protein L11
Q9R0N0	Galk1 Galk Glk		15N only	1	Galactokinase (EC 2.7.1.6) (Galactose kinase)
O35593	Psmd14 Pad1		15N only	1	26S proteasome non-ATPase regulatory subunit 14 (EC 3.4.19.-) (26S proteasome regulatory subunit RPN11) (MAD1)
P62492	Rab11a Rab11		15N only	4	Ras-related protein Rab-11A (Rab-11)
O70251	Eef1b Eef1b2		15N only	4	Elongation factor 1-beta (EF-1-beta)
P62754	Rps6		15N only	3	40S ribosomal protein S6 (Phosphoprotein NP33)
Q9CZ30	Ola1 Gtpbp9		15N only	2	Obg-like ATPase 1 (GTP-binding protein 9)
Q9CQ65	Mtap		15N only	2	S-methyl-5'-thioadenosine phosphorylase (EC 2.4.2.28) (5'-methylthioadenosine phosphorylase) (MTA phosphorylase) (MTAP) (MTAPase)
O88545	Cops6 Csn6		15N only	2	COP9 signalosome complex subunit 6 (SGN6) (Signalosome subunit 6) (JAB1-containing signalosome subunit 6)
Q91Z53	Grhpr Glxr		15N only	2	Glyoxylate reductase/hydroxypyruvate reductase (EC 1.1.1.79) (EC 1.1.1.81)
P62242	Rps8		15N only	2	40S ribosomal protein S8
Q61820	Rasl2-9		15N only	1	GTP-binding nuclear protein Ran, testis-specific isoform
P00493	Hprt1 Hprt		15N only	2	Hypoxanthine-guanine phosphoribosyltransferase (HGPRT) (HGPRTase) (EC 2.4.2.8) (HPRT B)
Q9DB29	Iah1		15N only	2	Isoamyl acetate-hydrolyzing esterase 1 homolog (EC 3.1.-.-)
Q9Z1W9	Stk39 Spak		15N only	2	STE20/SPS1-related proline-alanine-rich protein kinase (Ste-20-related kinase) (EC 2.7.11.1) (Serine/threonine-protein kinase 39)
Q8R001	Mapre2		15N only	1	Microtubule-associated protein RP/EB family member 2 (APC-binding protein EB2) (End-binding protein 2) (EB2)
Q9R062	Gyg1 Gyg		15N only	1	Glycogenin-1 (GN-1) (GN1) (EC 2.4.1.186)
Q9DCZ1	Gmpr Gmpr1		15N only	2	GMP reductase 1 (GMPR 1) (EC 1.7.1.7) (Guanosine 5'-monophosphate oxidoreductase 1) (Guanosine monophosphate reductase 1)
P21279	Gnaq		15N only	2	Guanine nucleotide-binding protein G(q) subunit alpha (Guanine nucleotide-binding protein alpha-q)
Q3UM45	Ppp1r7 Sds22		15N only	2	Protein phosphatase 1 regulatory subunit 7 (Protein phosphatase 1 regulatory subunit 22)
Q8BWY3	Etf1		15N only	2	Eukaryotic peptide chain release factor subunit 1 (Eukaryotic release factor 1) (eRF1)
Q8BZW8	Nhlrc2		15N only	1	NHL repeat-containing protein 2
Q8R146	Apeh		15N only	2	Acylamino-acid-releasing enzyme (AARE) (EC 3.4.19.1) (Acyl-peptide hydrolase) (APH) (Acylaminoacyl-peptidase)
P48193	Epb41 Epb4.1 Kiaa4056		15N only	2	Protein 4.1 (P4.1) (4.1R) (Band 4.1)
Q8BGQ7	Aars		15N only	4	Alanine--tRNA ligase, cytoplasmic (EC 6.1.1.7) (Alanyl-tRNA synthetase) (AlaRS) (Protein sticky) (Sti)
Q64737	Gart		15N only	2	Trifunctional purine biosynthetic protein adenosine-3 [Includes: Phosphoribosylamine--glycine ligase (EC 6.3.4.13) (Glycinamide ribonucleotide synthetase) (GARS) (Phosphoribosylglycinamide synthetase); Phosphoribosylformylglycinamidine cyclo-ligase (EC 6.3.3.1) (AIR synthase) (AIRS) (Phosphoribosyl-aminoimidazole synthetase); Phosphoribosylglycinamide formyltransferase (EC 2.1.2.2) (5'-phosphorib…
Q9JJI8	Rpl38		15N only	2	60S ribosomal protein L38
Q64520	Guk1 Gmk		15N only	1	Guanylate kinase (EC 2.7.4.8) (GMP kinase)
P01831	Thy1 Thy-1		15N only	2	Thy-1 membrane glycoprotein (Thy-1 antigen) (CD antigen CD90)
Q99LY9	Ndufs5		15N only	2	NADH dehydrogenase [ubiquinone] iron-sulfur protein 5 (Complex I-15 kDa) (CI-15 kDa) (NADH-ubiquinone oxidoreductase 15 kDa subunit)
P57746	Atp6v1d Atp6m Vatd		15N only	2	V-type proton ATPase subunit D (V-ATPase subunit D) (V-ATPase 28 kDa accessory protein) (Vacuolar proton pump subunit D)
P60824	Cirbp Cirp		15N only	2	Cold-inducible RNA-binding protein (A18 hnRNP) (Glycine-rich RNA-binding protein CIRP)
Q9CQX2	Cyb5b Cyb5m		15N only	2	Cytochrome b5 type B (Cytochrome b5 outer mitochondrial membrane isoform)
Q9CQA3	Sdhb		15N only	1	Succinate dehydrogenase [ubiquinone] iron-sulfur subunit, mitochondrial (EC 1.3.5.1) (Iron-sulfur subunit of complex II) (Ip)
Q9DCW4	Etfb		15N only	2	Electron transfer flavoprotein subunit beta (Beta-ETF)
Q9DCJ5	Ndufa8		15N only	3	NADH dehydrogenase [ubiquinone] 1 alpha subcomplex subunit 8 (Complex I-19kD) (CI-19kD) (Complex I-PGIV) (CI-PGIV) (NADH-ubiquinone oxidoreductase 19 kDa subunit)
Q9CRB9	Chchd3 Mic19		15N only	2	MICOS complex subunit Mic19 (Coiled-coil-helix-coiled-coil-helix domain-containing protein 3)
Q9D6U8	Fam162a E2ig5		15N only	1	Protein FAM162A (E2-induced gene 5 protein homolog) (Growth and transformation-dependent protein) (HGTD-P)
P62281	Rps11		15N only	2	40S ribosomal protein S11
Q9D6M3	Slc25a22 Gc1		15N only	2	Mitochondrial glutamate carrier 1 (GC-1) (Glutamate/H(+) symporter 1) (Solute carrier family 25 member 22)
P97427	Crmp1 Dpysl1 Ulip3		15N only	1	Dihydropyrimidinase-related protein 1 (DRP-1) (Collapsin response mediator protein 1) (CRMP-1) (Unc-33-like phosphoprotein 3) (ULIP-3)
Q62425	Ndufa4		15N only	2	Cytochrome c oxidase subunit NDUFA4
P11031	Sub1 Pc4 Rpo2tc1		15N only	2	Activated RNA polymerase II transcriptional coactivator p15 (Positive cofactor 4) (PC4) (SUB1 homolog) (Single-stranded DNA-binding protein p9) (p14)
Q61011	Gnb3		15N only	1	Guanine nucleotide-binding protein G(I)/G(S)/G(T) subunit beta-3 (Transducin beta chain 3)
P56135	Atp5mf Atp5j2		15N only	1	ATP synthase subunit f, mitochondrial (ATP synthase membrane subunit f)
Q99JF8	Psip1 Ledgf		15N only	2	PC4 and SFRS1-interacting protein (Lens epithelium-derived growth factor) (mLEDGF)
P56395	Cyb5a Cyb5		15N only	2	Cytochrome b5
Q9QXT0	Cnpy2 Msap Tmem4 Zsig9		15N only	1	Protein canopy homolog 2 (MIR-interacting saposin-like protein) (Putative secreted protein ZSIG9) (Transmembrane protein 4)
P83917	Cbx1 Cbx		15N only	2	Chromobox protein homolog 1 (Heterochromatin protein 1 homolog beta) (HP1 beta) (Heterochromatin protein p25) (M31) (Modifier 1 protein)
Q61411	Hras Hras1		15N only	2	GTPase HRas (H-Ras-1) (Transforming protein p21) (c-H-ras) (p21ras) [Cleaved into: GTPase HRas, N-terminally processed]
Q64704	Stx3 Stx3a		15N only	3	Syntaxin-3
Q8BVI4	Qdpr Dhpr		15N only	2	Dihydropteridine reductase (EC 1.5.1.34) (HDHPR) (Quinoid dihydropteridine reductase)
P84099	Rpl19		15N only	1	60S ribosomal protein L19
Q6PDM2	Srsf1 Sfrs1		15N only	2	Serine/arginine-rich splicing factor 1 (ASF/SF2) (Pre-mRNA-splicing factor SRp30a) (Splicing factor, arginine/serine-rich 1)
Q8R0A7	Kiaa0513		15N only	2	Uncharacterized protein KIAA0513
Q64433	Hspe1		15N only	2	10 kDa heat shock protein, mitochondrial (Hsp10) (10 kDa chaperonin) (Chaperonin 10) (CPN10)
P20108	Prdx3 Aop1 Mer5		15N only	1	Thioredoxin-dependent peroxide reductase, mitochondrial (EC 1.11.1.15) (Antioxidant protein 1) (AOP-1) (PRX III) (Perioredoxin-3) (Protein MER5)
P30681	Hmgb2 Hmg2		15N only	2	High mobility group protein B2 (High mobility group protein 2) (HMG-2)
Q9WV92	Epb41l3 Dal1 Epb4.1l3 Kiaa0987		15N only	1	Band 4.1-like protein 3 (4.1B) (Differentially expressed in adenocarcinoma of the lung protein 1) (DAL-1) (DAL1P) (mDAL-1) [Cleaved into: Band 4.1-like protein 3, N-terminally processed]
Q8VDW0	Ddx39a Ddx39		15N only	1	ATP-dependent RNA helicase DDX39A (EC 3.6.4.13) (DEAD box protein 39)
P58389	Ptpa Ppp2r4		15N only	1	Serine/threonine-protein phosphatase 2A activator (EC 5.2.1.8) (PP2A, subunit B', PR53 isoform) (Phosphotyrosyl phosphatase activator) (PTPA) (Serine/threonine-protein phosphatase 2A regulatory subunit 4) (Serine/threonine-protein phosphatase 2A regulatory subunit B')
Q9DC70	Ndufs7		15N only	2	NADH dehydrogenase [ubiquinone] iron-sulfur protein 7, mitochondrial (EC 1.6.99.3) (EC 7.1.1.2) (Complex I-20kD) (CI-20kD) (NADH-ubiquinone oxidoreductase 20 kDa subunit)
Q9WV35	Apobec2		15N only	1	C->U-editing enzyme APOBEC-2 (EC 3.5.4.36) (mRNA(cytosine(6666)) deaminase 2)
Q9Z1L4	Rs1 Rs1h Xlrs1		15N only	2	Retinoschisin (X-linked juvenile retinoschisis protein homolog)
Q80XN0	Bdh1 Bdh		15N only	2	D-beta-hydroxybutyrate dehydrogenase, mitochondrial (EC 1.1.1.30) (3-hydroxybutyrate dehydrogenase) (BDH)
Q920Q6	Msi2 Msi2h		15N only	4	RNA-binding protein Musashi homolog 2 (Musashi-2)
Q9R1T2	Sae1 Aos1 Sua1 Ubl1a1 Uble1a		15N only	2	SUMO-activating enzyme subunit 1 (Ubiquitin-like 1-activating enzyme E1A) [Cleaved into: SUMO-activating enzyme subunit 1, N-terminally processed]
P62869	Elob Tceb2		15N only	1	Elongin-B (EloB) (Elongin 18 kDa subunit) (RNA polymerase II transcription factor SIII subunit B) (SIII p18) (Transcription elongation factor B polypeptide 2)
P32921	Wars Wrs		15N only	2	Tryptophan--tRNA ligase, cytoplasmic (EC 6.1.1.2) (Tryptophanyl-tRNA synthetase) (TrpRS) [Cleaved into: T1-TrpRS; T2-TrpRS]
Q9CZ44	Nsfl1c		15N only	2	NSFL1 cofactor p47 (p97 cofactor p47)
Q9WV55	Vapa Vap33		15N only	2	Vesicle-associated membrane protein-associated protein A (VAMP-A) (VAMP-associated protein A) (VAP-A) (33 kDa VAMP-associated protein) (VAP-33)
P59708	Sf3b6 Sf3b14		15N only	2	Splicing factor 3B subunit 6 (Pre-mRNA branch site protein p14) (SF3b 14 kDa subunit)
Q9D517	Agpat3 Lpaat3		15N only	1	1-acyl-sn-glycerol-3-phosphate acyltransferase gamma (EC 2.3.1.51) (1-acylglycerol-3-phosphate O-acyltransferase 3) (1-AGP acyltransferase 3) (1-AGPAT 3) (Lysophosphatidic acid acyltransferase gamma) (LPAAT-gamma)
Q9CQA1	Trappc5		15N only	3	Trafficking protein particle complex subunit 5
Q8R5M8	Cadm1 Igsf4 Necl2 Ra175 Syncam SynCam1 Tslc1		15N only	2	Cell adhesion molecule 1 (Immunoglobulin superfamily member 4) (IgSF4) (Nectin-like protein 2) (NECL-2) (Spermatogenic immunoglobulin superfamily) (SgIgSF) (Synaptic cell adhesion molecule) (SynCAM) (Tumor suppressor in lung cancer 1) (TSLC-1)
Q9CQZ5	Ndufa6		15N only	2	NADH dehydrogenase [ubiquinone] 1 alpha subcomplex subunit 6 (Complex I-B14) (CI-B14) (NADH-ubiquinone oxidoreductase B14 subunit)
Q8VH51	Rbm39 Caper Rnpc2		15N only	2	RNA-binding protein 39 (Coactivator of activating protein 1 and estrogen receptors) (Coactivator of AP-1 and ERs) (RNA-binding motif protein 39) (RNA-binding region-containing protein 2) (Transcription coactivator CAPER)
Q8K0U4	Hspa12a Kiaa0417		15N only	1	Heat shock 70 kDa protein 12A
P24668	M6pr 46mpr		15N only	2	Cation-dependent mannose-6-phosphate receptor (CD Man-6-P receptor) (CD-MPR) (46 kDa mannose 6-phosphate receptor) (MPR 46)
P62830	Rpl23		15N only	2	60S ribosomal protein L23
[truncated: 519 more rows]

## Sheet: Vitreoretina
Table S5. A complete list of Vitreoretina proteins identified by mass spectrometry
[truncated: 1,240 more rows]
